# Supplementary material for: Endothelial SHANK3 Controls Tight Junction of Neonatal Blood-Brain Barrier
Source: Research Square preprint supplement (doi:10.21203/rs.3.rs-3938233/v1), 2024-03-19
Supplement: Supplementary file 1 [file 6772fa8e2b9336c0a81428a1.docx]

**Supplementary Information Table 3.**

**Primers used for cloning**

| Gene | Primer sequence (5’-3’) | Restriction enzyme site |
| --- | --- | --- |
| *BioID2-HA*  *(in* phSyn1-WASH1-BioID2-HA) | F-GGGAGTCCGGAAGCTTAGGTGGAGGAGGTT  R-CGCGGGATCCCTATGCGTAATCCGGTACAT | HindIII  BamHI |
| *hGSK3βS9A*  (in HA-*GSK3βS9A*-pcDNA3) | F-CGAACGCGGCCGCATGTCAGGGCGGCCCAGAAC  R-CGAACGCTAGCTCAGGTGGAGTTGGAAGCTGATGC | NotI  NheI |
| C/EBPα  (in pcDNA3 Flag C/EBPα) | F-CGAACGCGGCCGCGAGTCGGCCGACTTCTACGA  R-CGAACGGATCCTCACGCGCAGTTGCCCATGG | NotI  BamHI |
| *hGSK3βS9A*  (in HA-*GSK3βS9A*-pcDNA3) | F-GCGCGCGGTACCGCGGCCGCCCCCTCGACATGTCAGGGCGG  R-GCGCGCGAATTCGCGGCCGCTCCGTCGGGACTGTACTAGTTGGGACC | NotI  NotI |

**Primers used for identifying *Shank3*-KO and off-targets of *Shank3* sgRNA**

| Gene | Primer sequence (5’-3’) | Amplification length (bp) | Tm (°C) |
| --- | --- | --- | --- |
| *Shank3* | F-GCTAGCACCGGGATGGAC  R-CAAAGATCACACCCTGAGCG | 628 | 60 |
| *Ahi1* | F-AGCACGAGCACGTTCAGAG  R-GAGCACGTTCTGTGATGTACC | 228 | 60 |
| *Mylk* | F-GGCACCACTACACCAGACAA  R-GCAGAGGCAGGTATGGAGTC | 436 | 60 |
| *Alox12* | F-TCTTGCTCACTGACCTTGCC  R-AAAGTTTTGGACCTGGCCCC | 243 | 60 |
| *Col7a1* | F-AGTTCCCACCTCATCCTCCA  R-GGATGCCAGAAGACCAGACC | 508 | 60 |
| *Mppe1* | F-CGGTGTCGATCATACGGGAA  R-ACAATAAGCCTCTGACCGGC | 572 | 60 |

**Primers used for AAV titration**

| Gene | Primer sequence (5’-3’) | Amplification length (bp) | Tm (°C) |
| --- | --- | --- | --- |
| WPRE | F-TGGCGTGGTGTGCACTGT  R-AGGGACGTAGCAGAAGGACG | 271 | 62 |
| CLDN5 | F-GGCCCTGACAAACACAAAGAGATG  R-CTCTGCAAGATTGGGCTTTCCTG | 171 | 60 |

**Primers used for PCR & qRT-PCR**

| Gene | Primer sequence (5’-3’) | Amplification length (bp) | Tm (°C) |
| --- | --- | --- | --- |
| *Shank1* (h, m) | F-CCATCGAGGAATTCACCCCC  R-TCATGTTGACCACCTGACGG | 168 | 60 |
| *Shank2* (h, m) | F-ATTCTCTCAGGCCCAAAGGC  R-TTGGTGAAACCACAGGGCTT | 301 | 60 |
| *Shank3* (m) | F-TGGATGAGATCCTGGCAGTTG  R-GGCGCTCAAACAATGAGCTG | 141 | 60 |
| *SHANK3* (h) | F-GACATCGCAGACGCAGACTC  R-CTTCCGCAAGGAGCCCGG | 141 | 61 |
| *b-Actin* (h, m) | F-TCACCCACACTGTGCCCATCTACGA  R-CAGCGGAACCGCTCATTGCCAATGG | 295 | 68 |
| *Shank3Δe18* (m) | F-GGCTGAGCTCGAGGAACTTG  R-TCTCAGCAGGGGTGATCCTC | 170 /146 | 60 |
| *SHANK3Δe18* (h) | F-TCCATGACAGCTGAGCTCGAG  R-GGTGTGATCCTCCGACTGGT | 170 /146 | 60 |
| *Shank3(a)*  (exon 1-2) | F-CGGACCTGCAACAAACGAAG  R-TGTCCAGGTTAGGCGGGTAG | 201 | 60 |
| *Shank3(a+b)*  (exon 4-5) | F-GTCCAGCTACACAGCACAGA  R-GTTGCGGAGAACCTTCAGGA | 147 | 60 |
| *Shank3(a+b+c+d+e)*  (exon 19-20) | F-TGGATGAGATCCTGGCAGTTG  R-GGCGCTCAAACAATGAGCTG | 141 | 60 |
| *ZO-1* (m) | F-GCTTTAGCGAACAGAAGGAGC  R-TTCATTTTTCCGAGACTTCACCA | 156 | 60 |
| *Claudin-5* (m) | F-TAAGGCACGGGTAGCACTCA  R-AACTCGCGGACAACGATGTT | 102 | 60 |
| *C/EBP1α* (m) | F-GCAAAGCCAAGAAGTCGGTGGA  R-CCTTCTGTTGCGTCTCCACGTT | 126 | 63 |
| *Gapdh* (m) | F-TGGCAAAGTGGAGATTGTTGCC  R-AAGATGGTGATGGGCTTCCCG | 156 | 62 |
| *Shank3Δe18* (m) sequencing | F-CCAAAGCAGAGACCCCCATT  R-GGCGCTCAA ACAATGAGCTG | 516/492 | 60 |
| *SHANK3Δe18* (h)  sequencing | F-CCACGAGGGCTTTGGTTTTG  R-TTGGTCCGTGGAATCCCCTT | 609/584 | 60 |
| *FMR1* (h, m) | F-CAACCGCTGGTGAATGGAGT  R-TTCATGCCCTGTGCCATCTT | 140 (h)  144 (m) | 60 |
| *MECP2* (h, m) | F-GGGCTCAGGGAGGAAAAGTC  R-CCCGGTCACGGATAATGGAG | 256 (h, m) | 60 |
| *UBE3A* (h) | F-TGAGAACTCGAAAGGTGCCC  R-TGTACCAATGCCTCAGCACT | 204 | 60 |
| *Ube3a* (m) | F-AGGGAGGCGTTTCCAAAGAG  R-CAGACCCAGGACTATGCCAA | 164 | 60 |
| *OXTR* (h, m) | F-TCTTCGTGCAGATGTGGAGC  R-CTGCACGAGTTCGTGGAAGA | 152 (h, m) | 60 |
| *NLGN3* (h, m) | F-ACTTTGGGAAGCTAAGGGGTG  R-GTGAACCAGACTGGCAGCAT | 232 (h, m) | 60 |
| *ANK2* (h, m) | F-AGCCAGTAGAAGGCCGTAGA  R-GGCTGAAGGAAGGTCAGTGG | 113 (h, m) | 60 |
| *CDH9* (h, m) | F-CAGGCTTTTGACATCGGCAC  R-TAAGTGGCCAGGGAGTCGTA | 206 (h, m) | 60 |
| *CHD8* (h, m) | F-GGTACTTTGCTGGTGGGTGA  R-CTGGCAAAACCCGGTTGAAC | 256 (h, m) | 60 |
| *CYFIP2* (h, m) | F-TTGCTCAAGGTGATGGGCTT  R-AGCTCTATCTGCATGTCGCC | 158 (h, m) | 60 |
| *HOXB1*(h) | F-CTGGGGATCAGCTCAGTGTC  R-TCCTCAAAGCTCGAAGGCAC | 121 | 60 |
| *Hoxb1* (m) | F-ATCTGGAGTCAGCCCATCCT  R-TCCCCCAGAAAAACCCCAAG | 157 | 60 |
| *KCNQ5* (h, m) | F-GAATCCAAGCTGGACTGCCT  R-AGGCCTCTTGAGATGTTGGC | 215 (h, m) | 60 |
| *NLGN4* (h) | F-TATCACCTCTGTTTCCTCCCCA  R-GGGGGAAATAGGCCACACAG | 154 | 60 |
| *Nlgn4* (m) | F-GCAGCGTGAACTGCATGAAA  R-TCAGTCCGGATCTGTCCAGT | 105 | 60 |
| *PTEN* (h, m) | F-TTCACGTCCTACCCCTTTGC  R-CTGATGTAGGGACTAATAGCATCTGA | 577 (h)  567, 571 (m) | 60 |
| *TSC1* (h) | F-AAGCCGCCACTCGTTTATCC  R-AGGAGACGAAGTTGCAAGGG | 360 | 60 |
| *Tsc1* (m) | F-TGTGATGAGGACAGCGTGAC  R-CAATGCCAGACCCAAAAGCC | 369 | 60 |
| *TSC2* (h) | F-AATCCCAGGTCTGCAGAGGG  R-TTCCACTGCGTGCTCTTCAA | 159 | 60 |
| *Tsc2* (m) | F-AATCCCAGGTGTGCAGAAGG  R-CTCCACTGCATGCTCCTCAA | 159 | 60 |

**Primers used for genotyping**

| Gene | Primer sequence (5’-3’) | Amplification length (bp) | Tm (°C) |
| --- | --- | --- | --- |
| *Shank3 e4-9 f/f* | F-AGGACAGGTGACAGTCAATGG  R-GCCTTGTCTGGTGGTACAGG  R-GGCTATGTTCATGGGATCTTGT | 660 (floxed)  437 (wild type)  317 (knock-out) | 60 |
| *Tek-Cre* | F-GCGGTCTGGCAGTAAAAACTATC  R-GTGAAACAGCATTGCTGTCACTT  F-CTAGGCCACAGAATTGAAAGATCT  R-GTAGGTGGAAATTCTAGCATCATCC | 102 (Cre)  324 (internal positive control) | 60 |
| *Ai-14* | F-AAGGGAGCTGCAGTGGAGTA  R-CCGAAAATCTGTGGGAAGTC  F-CTGTTCCTGTACGGCATGG  R-GGCATTAAAGCAGCGTATCC | 196 (floxed)  297 (wild type) | 60 |
| *Sex*  *(Rbm31x/y gene)* | F-CACCTTAAGAACAAGCCAATACA  R-GGCTTGTCCTGAAAACATTTGG | 269 (from X chromosome)  353 (from Y chromosome) | 59 |
