# Supplementary material for: Endothelial SHANK3 Controls Tight Junction of Neonatal Blood-Brain Barrier
Source: Research Square preprint supplement (doi:10.21203/rs.3.rs-3938233/v1), 2024-03-19
Supplement: Supplementary file 2 [file b887c2444fe370bcb5b45d84.xlsx]

## Sheet: Table of Contents
Supplementary Information Table 2.
Sample Label	Protein
C1	Control group expressing only Shank3DE18
C2	Control group expressing only BioID2
E	Experimental group expressing Shank3DE18-BioID2
Sheet Name	Description
Raw Protein	Raw data and corresponding protein information
Shank3dE18-BioID2	Statistical analysis of identified proteins to determine enrichment in Shank3DE18-BioID2 samples
GO_Cellular Component	Go analysis of cellular component of Shank3DE18-BioID2 enriched proteins
Edges	Evidence for protein-protein interactions in Shank3DE18-BioID2 network (corresponding to dashed gray edges in Figure 3b)

## Sheet: Raw protein
Accession	UniProt Accession	Description (Protein name)	Gene name	C1.F1	C1.F2	C1.F3	C1.F4	C2.F5	C2.F6	C2.F7	C2.F8	E.F9	E.F10	E.F11	E.F12
A0JLY1	A0JLY1	Cilia- and flagella- associated protein 210 (Coiled-coil domain-containing protein 173)	Cfap210	NA	NA	NA	NA	NA	NA	NA	NA	6675358	NA	NA	5.52212e+06
A2A432-1	A2A432	Cullin-4B (CUL-4B)	Cul4b	NA	NA	NA	NA	982456	879146	432982	NA	NA	NA	NA	NA
A2A699	A2A699	Protein FAM171A2	Fam171a2	NA	NA	NA	NA	1.10366e+07	1.74483e+07	5.90454e+06	8.04343e+06	5.9823e+06	1.1238e+06	4.51414e+06	5.6414e+06
A2A6A1	A2A6A1	G patch domain-containing protein 8	Gpatch8	NA	NA	NA	NA	129640	399619	84048.7	205761	NA	NA	NA	NA
A2A6T1	A2A6T1	Cerebellar degeneration-related protein 2-like	Cdr2l	NA	NA	NA	NA	1.63977e+07	14624270	6.54997e+06	9.14494e+06	NA	NA	NA	NA
A2A791	A2A791	Zinc finger MYM-type protein 4 (Zinc finger protein 262)	Zmym4	NA	NA	NA	NA	1918537	1.67959e+06	1.34671e+06	1.72707e+06	NA	NA	NA	NA
A2A7S8	A2A7S8	Uncharacterized protein KIAA1522	Kiaa1522	NA	NA	NA	NA	2.8158e+06	6.19769e+06	2.26344e+06	2.02642e+06	3.18057e+06	NA	3697131	3.75248e+06
A2A863	A2A863	Integrin beta-4 (CD antigen CD104)	Itgb4	NA	NA	NA	NA	NA	NA	NA	NA	455792	NA	NA	NA
A2A935	A2A935	Histone-lysine N-methyltransferase PRDM16 (EC 2.1.1.367) (PR domain zinc finger protein 16) (PR domain-containing protein 16) (Transcription factor MEL1) (MDS1/EVI1-like gene 1)	Prdm16	NA	NA	NA	NA	4.14708e+06	6680187	3192722	3766389	NA	NA	NA	NA
A2A9T0	A2A9T0	TANK-binding kinase 1-binding protein 1 (TBK1-binding protein 1) (Similar to NAP1 TBK1 adapter)	Tbkbp1	NA	NA	NA	NA	NA	NA	NA	NA	1.48136e+07	2.23677e+06	9.70712e+06	14673707
A2AAJ9-1	A2AAJ9	Obscurin (EC 2.7.11.1) (Obscurin-RhoGEF) (Obscurin-myosin light chain kinase) (Obscurin-MLCK)	Obscn	NA	NA	NA	NA	NA	NA	NA	NA	NA	NA	NA	NA
A2AAY5	A2AAY5	SH3 and PX domain-containing protein 2B (Factor for adipocyte differentiation 49) (Tyrosine kinase substrate with four SH3 domains)	Sh3pxd2b	NA	NA	NA	NA	NA	NA	NA	NA	2427863	430179	934773	1.19338e+06
A2AB59-1	A2AB59	Rho GTPase-activating protein 27 (CIN85-associated multi-domain-containing Rho GTPase-activating protein 1) (Rho-type GTPase-activating protein 27)	Arhgap27	NA	NA	NA	NA	2.09627e+06	2.12852e+06	1.21187e+06	869206	9.92306e+07	2.42717e+07	6.32458e+07	5.31931e+07
A2AGT5	A2AGT5	Cytoskeleton-associated protein 5	Ckap5	NA	NA	NA	NA	7.02187e+06	4.89125e+06	3.84364e+06	4.64339e+06	NA	NA	NA	NA
A2AHC3-1	A2AHC3	Calmodulin-regulated spectrin-associated protein 1	Camsap1	NA	NA	NA	NA	3.41443e+06	6.24418e+06	3.19988e+06	3.88788e+06	3.62942e+06	795219	1.73345e+06	2.39114e+06
A2AI08	A2AI08	Taperin	Tprn	NA	NA	NA	NA	NA	NA	NA	NA	1.6275e+06	86420.2	NA	1.03769e+06
A2AIV2-1	A2AIV2	Protein virilizer homolog	Virma	NA	NA	NA	NA	768703	601208	573586	894802	NA	NA	NA	NA
A2AJ76-1	A2AJ76	Hemicentin-2	Hmcn2	NA	NA	NA	NA	617181	3243002	699673	797024	NA	NA	NA	NA
A2AJI0	A2AJI0	MAP7 domain-containing protein 1	Map7d1	NA	NA	NA	NA	494877	492547	179277	231281	NA	NA	NA	NA
A2ALU4	A2ALU4	Protein Shroom2 (Protein Apxl)	Shroom2	NA	NA	NA	NA	6.84294e+06	1.28958e+07	5.15619e+06	4.9645e+06	1.19195e+07	NA	5.44561e+06	5.22315e+06
A2AN08	A2AN08	E3 ubiquitin-protein ligase UBR4 (EC 2.3.2.27) (N-recognin-4) (RING-type E3 ubiquitin transferase UBR4) (Zinc finger UBR1-type protein 1) (p600)	Ubr4	NA	NA	NA	NA	NA	NA	NA	NA	NA	NA	NA	NA
A2APB8	A2APB8	Targeting protein for Xklp2	Tpx2	NA	NA	NA	NA	2.18621e+07	2.38918e+07	1.01365e+07	1.60613e+07	1.32223e+07	1.11909e+06	9.45136e+06	1.11188e+07
A2AQ25-1	A2AQ25	Sickle tail protein (Enhancer trap locus 4)	Skt	NA	NA	NA	NA	1.05195e+06	1.5213e+06	597921	799665	NA	NA	NA	NA
A2AR02	A2AR02	Peptidyl-prolyl cis-trans isomerase G (PPIase G) (Peptidyl-prolyl isomerase G) (EC 5.2.1.8) (Cyclophilin G) (Rotamase G)	Ppig	NA	NA	NA	NA	1.84663e+06	13313934	NA	NA	NA	NA	NA	NA
A2AWA9	A2AWA9	Rab GTPase-activating protein 1 (GAP and centrosome-associated protein) (Rab6 GTPase-activating protein GAPCenA)	Rabgap1	NA	NA	NA	NA	NA	NA	NA	NA	NA	NA	NA	NA
A2AWL7	A2AWL7	MAX gene-associated protein	Mga	NA	NA	NA	NA	1.24526e+07	1.94088e+07	4.66086e+06	1.27811e+07	399179	NA	NA	188749
A2BE28	A2BE28	Ribosomal biogenesis protein LAS1L (Protein LAS1 homolog)	Las1l	NA	NA	NA	NA	2.27602e+06	1.79755e+06	1489542	1.56896e+06	NA	NA	NA	NA
A2BH40	A2BH40	AT-rich interactive domain-containing protein 1A (ARID domain-containing protein 1A) (BRG1-associated factor 250) (BAF250) (BRG1-associated factor 250a) (BAF250A) (Osa homolog 1) (SWI-like protein) (SWI/SNF complex protein p270) (SWI/SNF-related, matrix-associated, actin-dependent regulator of chromatin subfamily F member 1)	Arid1a	NA	NA	NA	NA	2.52722e+07	2.30736e+07	2.21155e+07	2.58842e+07	NA	NA	NA	NA
A2RSJ4	A2RSJ4	Bridge-like lipid transfer protein family member 3B (Syntaxin-6 Habc-interacting protein of 164 kDa) (UHRF1-binding protein 1-like)	Bltp3b	NA	NA	NA	NA	175750	632352	160300	233827	NA	NA	NA	NA
A2RSY6	A2RSY6	TRMT1-like protein (EC 2.1.1.-)	Trmt1l	NA	NA	NA	NA	NA	NA	NA	NA	NA	NA	550295	NA
A3KGB4	A3KGB4	TBC1 domain family member 8B	Tbc1d8b	NA	NA	NA	NA	843755	1245893	1.0952e+06	1.11074e+06	348417	NA	540003	414014
A3KGF9	A3KGF9	Coiled-coil domain-containing protein 9B	Ccdc9b	NA	NA	NA	NA	5.53547e+06	5.36451e+06	2.60246e+06	3.00597e+06	1.58573e+06	135820	1.09228e+06	1.27016e+06
A3KGV1	A3KGV1	Outer dense fiber protein 2 (84 kDa outer dense fiber protein) (Cenexin) (Outer dense fiber of sperm tails protein 2)	Odf2	NA	NA	NA	NA	NA	NA	NA	NA	NA	NA	1.4143e+06	NA
A4Q9E5-1	A4Q9E5	Tubulin monoglycylase TTLL3 (EC 6.3.2.-) (Tubulin--tyrosine ligase-like protein 3)	Ttll3	NA	NA	NA	NA	NA	NA	NA	NA	NA	NA	9427320	NA
A6H619-1	A6H619	PHD and RING finger domain-containing protein 1	Phrf1	NA	NA	NA	NA	1.03843e+06	1.75162e+06	165866	635254	NA	NA	NA	NA
A6H690-1	A6H690	IQ and AAA domain-containing protein 1-like (Protein IQCA1P1)	Iqca1l	NA	NA	NA	NA	NA	NA	NA	NA	NA	NA	NA	NA
A6X8Z5	A6X8Z5	Rho GTPase-activating protein 31 (Cdc42 GTPase-activating protein)	Arhgap31	NA	NA	NA	NA	7.29651e+06	1.38786e+07	7.62777e+06	6.69477e+06	1.09118e+06	NA	NA	444719
B1AQJ2	B1AQJ2	Ubiquitin carboxyl-terminal hydrolase 36 (EC 3.4.19.12) (Deubiquitinating enzyme 36) (Ubiquitin thioesterase 36) (Ubiquitin-specific-processing protease 36)	Usp36	NA	NA	NA	NA	1.61552e+06	2.66999e+06	1.20352e+06	1.33503e+06	NA	NA	NA	NA
B1AX39	B1AX39	Zinc finger CCHC domain-containing protein 7 (TRAMP-like complex RNA-binding factor ZCCHC7)	Zcchc7	NA	NA	NA	NA	NA	NA	NA	NA	NA	NA	NA	NA
B1AY10	B1AY10	Transcriptional repressor NF-X1 (m-Nfx.1) (EC 2.3.2.-) (Nuclear transcription factor, X box-binding protein 1)	Nfx1	NA	NA	NA	NA	NA	NA	NA	NA	1.31043e+06	221057	334876	488389
B1AZI6	B1AZI6	THO complex subunit 2 (Tho2)	Thoc2	NA	NA	NA	NA	2.2011e+07	1.96676e+07	10900500	1.50796e+07	NA	NA	NA	NA
B1AZP2-1	B1AZP2	Disks large-associated protein 4 (DAP-4) (PSD-95/SAP90-binding protein 4) (SAP90/PSD-95-associated protein 4) (SAPAP-4)	Dlgap4	NA	NA	NA	NA	NA	NA	NA	NA	2.94797e+06	NA	NA	NA
B2RQC6	B2RQC6	CAD protein [Includes: Glutamine-dependent carbamoyl-phosphate synthase (EC 6.3.5.5); Aspartate carbamoyltransferase (EC 2.1.3.2); Dihydroorotase (EC 3.5.2.3)]	Cad	NA	NA	NA	NA	NA	NA	NA	NA	797483	NA	718254	NA
B2RRE7	B2RRE7	OTU domain-containing protein 4 (EC 3.4.19.12)	Otud4	NA	NA	NA	NA	4.59992e+06	4.41772e+06	2.33739e+06	3.48892e+06	NA	NA	915484	NA
B2RUR8	B2RUR8	OTU domain-containing protein 7B (EC 3.4.19.12) (Cellular zinc finger anti-NF-kappa-B protein) (Zinc finger A20 domain-containing protein 1) (Zinc finger protein Cezanne)	Otud7b	NA	NA	NA	NA	NA	NA	NA	NA	NA	NA	NA	NA
B2RY56	B2RY56	RNA-binding protein 25 (RNA-binding motif protein 25)	Rbm25	NA	NA	NA	NA	7.58716e+07	9.69695e+07	2.74561e+07	4.0493e+07	857511	NA	5.55714e+06	536369
B9EJ86	B9EJ86	Oxysterol-binding protein-related protein 8 (ORP-8) (OSBP-related protein 8)	Osbpl8	NA	NA	NA	NA	NA	NA	NA	NA	NA	NA	NA	NA
B9EKI3	B9EKI3	TATA element modulatory factor (TMF) (Androgen receptor coactivator 160 kDa protein) (Androgen receptor-associated protein of 160 kDa)	Tmf1	NA	NA	NA	NA	7.62215e+07	7.2741e+07	3.46575e+07	4.58219e+07	NA	NA	NA	NA
D0QMC3	D0QMC3	Myeloid cell nuclear differentiation antigen-like protein	Mndal	NA	NA	NA	NA	NA	NA	NA	NA	NA	NA	NA	NA
D3YXG0	D3YXG0	Hemicentin-1 (Fibulin-6) (FIBL-6)	Hmcn1	NA	NA	NA	NA	NA	NA	NA	NA	447536	558928	1352612	3.77069e+06
D3YXK2	D3YXK2	Scaffold attachment factor B1 (SAF-B1)	Safb	NA	NA	NA	NA	9.10416e+07	9.95327e+07	5.3592e+07	6.5816e+07	1.576e+06	570459	1.24544e+06	2.21336e+06
D3Z7P3-2	D3Z7P3	Glutaminase kidney isoform, mitochondrial (GLS) (EC 3.5.1.2) [Cleaved into: Glutaminase kidney isoform, mitochondrial 68 kDa chain; Glutaminase kidney isoform, mitochondrial 65 kDa chain]	Gls	37063.1	163992	134141	307251	6.1236e+06	8.12793e+06	3.60435e+06	5043115	2.68767e+06	3.11921e+06	1.16836e+07	2.44195e+06
E9PV86	E9PV86	Multiple C2 and transmembrane domain-containing protein 1	Mctp1	NA	NA	NA	NA	NA	NA	NA	NA	NA	NA	NA	NA
E9PVX6	E9PVX6	Proliferation marker protein Ki-67 (Antigen identified by monoclonal antibody Ki-67 homolog) (Antigen KI-67 homolog) (Antigen Ki67 homolog)	Mki67	NA	NA	NA	NA	5.79686e+07	8.74182e+07	4.5523e+07	4.6286e+07	343681	134811	601211	968840
E9PYL2	E9PYL2	Proline-rich protein 12	Prr12	NA	NA	NA	NA	782635	875891	660977	847394	NA	NA	NA	NA
E9PZJ8-1	E9PZJ8	Activating signal cointegrator 1 complex subunit 3 (EC 3.6.4.12)	Ascc3	NA	NA	NA	NA	NA	546041	609666	816366	NA	59620.8	1.42552e+06	157523
E9Q1P8	E9Q1P8	Interferon regulatory factor 2-binding protein 2 (IRF-2-binding protein 2) (IRF-2BP2)	Irf2bp2	NA	NA	NA	NA	529940	678988	559668	734824	NA	NA	NA	NA
E9Q3L2	E9Q3L2	Phosphatidylinositol 4-kinase alpha (PI4-kinase alpha) (PI4K-alpha) (PtdIns-4-kinase alpha) (EC 2.7.1.67)	Pi4ka	NA	NA	NA	NA	782298	1.07972e+06	412102	413206	730712	NA	NA	549158
E9Q4P1	E9Q4P1	WD repeat and FYVE domain-containing protein 1 (WD40- and FYVE domain-containing protein 1)	Wdfy1	NA	NA	NA	NA	NA	NA	NA	NA	1.13675e+06	NA	NA	1.21061e+06
E9Q4Z2	E9Q4Z2	Acetyl-CoA carboxylase 2 (EC 6.4.1.2) (ACC-beta)	Acacb	NA	480985	NA	675944	888009	1.28619e+06	774587	NA	1.49944e+06	189843	5.71744e+06	1.08038e+06
E9Q555	E9Q555	E3 ubiquitin-protein ligase RNF213 (EC 2.3.2.27) (EC 3.6.4.-) (E3 ubiquitin-lipopolysaccharide ligase RNF213) (EC 2.3.2.-) (Mysterin) (RING finger protein 213)	Rnf213	NA	NA	NA	NA	1.22653e+07	1.25686e+07	7.2352e+06	1.07304e+07	4.04093e+06	583622	1.09244e+07	3.67144e+06
E9Q557	E9Q557	Desmoplakin (DP)	Dsp	NA	NA	NA	NA	6116618	8.07682e+06	4.92781e+06	5.84291e+06	1.73067e+06	2.25997e+06	1.30776e+07	1.49957e+06
E9Q5C9	E9Q5C9	Nucleolar and coiled-body phosphoprotein 1 (140 kDa nucleolar phosphoprotein) (Nopp140)	Nolc1	NA	NA	NA	NA	5.71302e+07	2.39347e+08	2.92754e+07	4.89929e+07	NA	NA	NA	NA
E9Q5F9	E9Q5F9	Histone-lysine N-methyltransferase SETD2 (EC 2.1.1.359) (Lysine N-methyltransferase 3A) (Protein-lysine N-methyltransferase SETD2) (EC 2.1.1.-) (SET domain-containing protein 2)	Setd2	NA	NA	NA	NA	1.97757e+07	2.234e+07	1.16293e+07	1.6923e+07	NA	NA	NA	NA
E9Q5G3	E9Q5G3	Kinesin-like protein KIF23	Kif23	NA	NA	NA	NA	NA	NA	NA	NA	212427	161676	208269	184060
E9Q5K9-1	E9Q5K9	YTH domain-containing protein 1	Ythdc1	NA	NA	NA	NA	2.05131e+06	1.09053e+07	1.6919e+06	2997657	283005	NA	169678	751122
E9Q634	E9Q634	Unconventional myosin-Ie (Unconventional myosin 1E)	Myo1e	NA	NA	NA	NA	NA	NA	NA	NA	9.06617e+06	2.68812e+06	3.99554e+07	1.21558e+07
E9Q6B2	E9Q6B2	Coiled-coil domain-containing protein 85C	Ccdc85c	NA	NA	NA	NA	4.72278e+06	9287488	3.2948e+06	3.69446e+06	2.97657e+06	NA	1.45937e+06	1.01056e+06
E9Q6J5	E9Q6J5	Biorientation of chromosomes in cell division protein 1-like 1	Bod1l	NA	NA	NA	NA	7.12833e+06	4.76769e+06	3.31111e+06	3.4831e+06	NA	NA	NA	NA
E9Q784	E9Q784	Zinc finger CCCH domain-containing protein 13	Zc3h13	NA	NA	NA	NA	1.87991e+06	2.53654e+06	487050	1.24514e+06	NA	NA	NA	NA
E9Q7D5	E9Q7D5	Rho guanine nucleotide exchange factor 5	Arhgef5	NA	NA	NA	NA	NA	NA	NA	NA	NA	NA	NA	NA
E9Q7F2	E9Q7F2	E3 ubiquitin-protein ligase RNF169 (EC 2.3.2.27) (RING finger protein 169) (RING-type E3 ubiquitin transferase RNF169)	Rnf169	NA	NA	NA	NA	NA	NA	NA	NA	NA	NA	2149250	NA
E9Q7G0	E9Q7G0	Nuclear mitotic apparatus protein 1 (Nuclear mitotic apparatus protein) (NuMA protein)	Numa1	110020	508757	644924	2.07874e+06	3.82307e+07	4.0973e+07	2.98336e+07	3.85534e+07	1.36364e+06	1.15816e+06	5.60686e+06	4.02779e+06
E9Q9A9-1	E9Q9A9	2'-5'-oligoadenylate synthase 2 ((2-5')oligo(A) synthase 2) (2-5A synthase 2) (EC 2.7.7.84) (2',5'-oligoadenylate synthetase-like 11)	Oas2	NA	NA	NA	NA	5.71783e+06	12760895	3.79766e+06	6.61289e+06	NA	NA	NA	NA
E9Q9R9	E9Q9R9	Disks large homolog 5	Dlg5	NA	NA	NA	NA	NA	NA	NA	NA	389732	407955	187497	659035
F6ZDS4	F6ZDS4	Nucleoprotein TPR (NPC-associated intranuclear protein) (Translocated promoter region and nuclear basket protein)	Tpr	NA	NA	NA	NA	2.3163e+07	1.9136e+07	1.36608e+07	1.917e+07	NA	NA	NA	NA
G3X982	G3X982	Aldehyde oxidase 3 (EC 1.2.3.1) (Aldehyde oxidase homolog 1) (Azaheterocycle hydroxylase 3) (EC 1.17.3.-)	Aox3	NA	NA	NA	NA	28622130	24767524	19716636	26520386	NA	NA	NA	NA
G3X9C2	G3X9C2	F-box only protein 50 (NCC receptor protein 1) (NCCRP-1) (Non-specific cytotoxic cell receptor protein 1 homolog)	Nccrp1	NA	238270	331686	245433	838846	NA	841552	128639	NA	475848	958372	477955
G3X9J0	G3X9J0	Signal-induced proliferation-associated 1-like protein 3 (SIPA1-like protein 3) (SPA-1-like protein 3)	Sipa1l3	NA	NA	NA	NA	3.93504e+07	7.31961e+07	2.08166e+07	3.02392e+07	1.24437e+08	2.31136e+07	9.9474e+07	7.92795e+07
G5E829	G5E829	Plasma membrane calcium-transporting ATPase 1 (EC 7.2.2.10) (Plasma membrane calcium ATPase isoform 1) (PMCA1) (Plasma membrane calcium pump isoform 1)	Atp2b1	NA	NA	NA	NA	1.49499e+06	2.46242e+06	774485	1.30351e+06	3.19887e+06	285658	732321	700119
G5E870	G5E870	E3 ubiquitin-protein ligase TRIP12 (EC 2.3.2.26) (HECT-type E3 ubiquitin transferase TRIP12) (Thyroid receptor-interacting protein 12) (TR-interacting protein 12) (TRIP-12)	Trip12	NA	NA	NA	NA	1.92673e+07	1.28301e+07	1.24064e+07	1.39171e+07	NA	NA	NA	NA
G5E8Z2	G5E8Z2	Transcription initiation factor TFIID subunit 4B (Transcription initiation factor TFIID 105 kDa subunit) (TAF(II)105) (TAFII-105) (TAFII105)	Taf4b	NA	NA	NA	NA	1.84329e+06	1.37588e+06	885516	1092643	NA	NA	NA	NA
O08528	O08528	Hexokinase-2 (EC 2.7.1.1) (Hexokinase type II) (HK II)	Hk2	NA	NA	NA	NA	280746	498752	NA	NA	NA	NA	NA	NA
O08529	O08529	Calpain-2 catalytic subunit (EC 3.4.22.53) (80 kDa M-calpain subunit) (CALP80) (Calcium-activated neutral proteinase 2) (CANP 2) (Calpain M-type) (Calpain-2 large subunit) (Millimolar-calpain) (M-calpain)	Capn2	NA	NA	NA	NA	4.18473e+06	4.78606e+06	2.91844e+06	3.14695e+06	2.33302e+06	431356	6311980	3.68883e+06
O08530	O08530	Sphingosine 1-phosphate receptor 1 (S1P receptor 1) (S1P1) (Endothelial differentiation G-protein coupled receptor 1) (Lysophospholipid receptor B1) (Sphingosine 1-phosphate receptor Edg-1) (S1P receptor Edg-1) (CD antigen CD363)	S1pr1	NA	NA	NA	NA	NA	NA	NA	NA	NA	NA	NA	NA
O08547	O08547	Vesicle-trafficking protein SEC22b (ER-Golgi SNARE of 24 kDa) (ERS-24) (ERS24) (SEC22 vesicle-trafficking protein homolog B) (SEC22 vesicle-trafficking protein-like 1) (mSec22b)	Sec22b	NA	NA	NA	NA	1.21828e+06	783119	844215	953055	NA	NA	NA	NA
O08553	O08553	Dihydropyrimidinase-related protein 2 (DRP-2) (Unc-33-like phosphoprotein 2) (ULIP-2)	Dpysl2	NA	NA	NA	NA	1.63475e+06	1.03899e+06	564491	1.13125e+06	1.3611e+06	422685	NA	960508
O08579	O08579	Emerin	Emd	NA	NA	NA	NA	1.68867e+07	2.969e+07	8.43714e+06	7.98902e+06	NA	NA	NA	NA
O08599	O08599	Syntaxin-binding protein 1 (Protein unc-18 homolog 1) (Unc18-1) (Protein unc-18 homolog A) (Unc-18A)	Stxbp1	NA	NA	NA	NA	492689	600484	152972	293905	NA	NA	NA	NA
O08665	O08665	Semaphorin-3A (Semaphorin III) (Sema III) (Semaphorin-D) (Sema D)	Sema3a	NA	NA	NA	NA	1573008	NA	1.92104e+06	2.43654e+06	NA	NA	NA	NA
O08709	O08709	Peroxiredoxin-6 (EC 1.11.1.27) (1-Cys peroxiredoxin) (1-Cys PRX) (Acidic calcium-independent phospholipase A2) (aiPLA2) (EC 3.1.1.4) (Antioxidant protein 2) (Glutathione-dependent peroxiredoxin) (Lysophosphatidylcholine acyltransferase 5) (LPC acyltransferase 5) (LPCAT-5) (Lyso-PC acyltransferase 5) (EC 2.3.1.23) (Non-selenium glutathione peroxidase) (NSGPx)	Prdx6	504235	474178	383581	656214	1.98603e+07	2.62207e+07	1.00636e+07	9.6967e+06	1.81129e+07	5.17588e+06	30791853	4.84357e+06
O08715	O08715	A-kinase anchor protein 1, mitochondrial (Dual specificity A-kinase-anchoring protein 1) (D-AKAP-1) (Protein kinase A-anchoring protein 1) (PRKA1) (Spermatid A-kinase anchor protein) (S-AKAP)	Akap1	NA	NA	NA	NA	1.64972e+07	1.95532e+07	8.78187e+06	7.14894e+06	NA	NA	NA	NA
O08739	O08739	AMP deaminase 3 (EC 3.5.4.6) (AMP deaminase H-type) (AMP deaminase isoform E) (Heart-type AMPD)	Ampd3	NA	NA	NA	NA	419153	661787	210991	342243	NA	NA	NA	NA
O08749	O08749	Dihydrolipoyl dehydrogenase, mitochondrial (EC 1.8.1.4) (Dihydrolipoamide dehydrogenase)	Dld	NA	1.62178e+06	1.62463e+06	1.81428e+06	2.84194e+06	2.43831e+06	1.71675e+06	2.94173e+06	965699	225501	2.08178e+06	1.50375e+06
O08756	O08756	3-hydroxyacyl-CoA dehydrogenase type-2 (EC 1.1.1.35) (17-beta-estradiol 17-dehydrogenase) (EC 1.1.1.62) (2-methyl-3-hydroxybutyryl-CoA dehydrogenase) (MHBD) (3-alpha-(17-beta)-hydroxysteroid dehydrogenase (NAD(+))) (EC 1.1.1.239) (3-hydroxy-2-methylbutyryl-CoA dehydrogenase) (EC 1.1.1.178) (3-hydroxyacyl-CoA dehydrogenase type II) (3alpha(or 20beta)-hydroxysteroid dehydrogenase) (EC 1.1.1.53) (7-…	Hsd17b10	NA	NA	NA	NA	NA	NA	NA	NA	2.06703e+06	NA	12912592	2.26764e+06
O08784	O08784	Treacle protein (Treacher Collins syndrome protein homolog)	Tcof1	NA	NA	NA	NA	3.1394e+08	6.01829e+08	1.59197e+08	2.17812e+08	NA	NA	NA	NA
O08807	O08807	Peroxiredoxin-4 (EC 1.11.1.24) (Antioxidant enzyme AOE372) (Peroxiredoxin IV) (Prx-IV) (Thioredoxin peroxidase AO372) (Thioredoxin-dependent peroxide reductase A0372) (Thioredoxin-dependent peroxiredoxin 4)	Prdx4	NA	NA	NA	NA	2.9986e+07	5.82514e+07	2.29848e+07	2.92208e+07	3.51617e+06	NA	6371884	3.48799e+06
O08810	O08810	116 kDa U5 small nuclear ribonucleoprotein component (Elongation factor Tu GTP-binding domain-containing protein 2) (U5 snRNP-specific protein, 116 kDa) (U5-116 kDa)	Eftud2	NA	NA	NA	NA	NA	NA	NA	NA	NA	NA	NA	NA
O08967	O08967	Cytohesin-3 (ARF nucleotide-binding site opener 3) (Protein ARNO3) (General receptor of phosphoinositides 1) (Grp1) (PH, SEC7 and coiled-coil domain-containing protein 3) (CLM3) (SEC7 homolog C) (mSec7-3)	Cyth3	NA	NA	NA	NA	NA	NA	NA	NA	NA	NA	NA	NA
O08992	O08992	Syntenin-1 (Scaffold protein Pbp1) (Syndecan-binding protein 1)	Sdcbp	NA	NA	NA	NA	819280	1.14776e+06	885563	1.08502e+06	NA	NA	4353039	583766
O08997	O08997	Copper transport protein ATOX1 (Metal transport protein ATX1)	Atox1	NA	NA	NA	NA	NA	NA	NA	NA	1.04656e+06	346423	296311	886364
O09005	O09005	Sphingolipid delta(4)-desaturase DES1 (EC 1.14.19.17) (Degenerative spermatocyte homolog 1) (Dihydroceramide desaturase-1) (Retinol isomerase) (EC 5.2.1.-)	Degs1	NA	NA	NA	NA	NA	NA	NA	NA	NA	NA	NA	NA
O09012-1	O09012	Peroxisomal targeting signal 1 receptor (PTS1 receptor) (PTS1R) (PTS1-BP) (PXR1P) (Peroxin-5) (Peroxisomal C-terminal targeting signal import receptor) (Peroxisome receptor 1)	Pex5	NA	NA	NA	NA	814013	239794	388089	587771	6.49037e+06	469507	600327	3.16872e+06
O09044	O09044	Synaptosomal-associated protein 23 (SNAP-23) (Syndet) (Vesicle-membrane fusion protein SNAP-23)	Snap23	NA	NA	NA	NA	6.21047e+06	6670405	3.24215e+06	4.08918e+06	NA	NA	NA	NA
O09106	O09106	Histone deacetylase 1 (HD1) (EC 3.5.1.98) (Protein deacetylase HDAC1) (EC 3.5.1.-) (Protein decrotonylase HDAC1) (EC 3.5.1.-)	Hdac1	NA	NA	NA	NA	5.85111e+06	4.22236e+06	4.11967e+06	3.80451e+06	2.28998e+06	795574	1.31495e+06	1.83719e+06
O09131	O09131	Glutathione S-transferase omega-1 (GSTO-1) (EC 2.5.1.18) (Glutathione S-transferase omega 1-1) (GSTO 1-1) (Glutathione-dependent dehydroascorbate reductase) (EC 1.8.5.1) (Monomethylarsonic acid reductase) (MMA(V) reductase) (EC 1.20.4.2) (S-(Phenacyl)glutathione reductase) (SPG-R) (p28)	Gsto1	NA	NA	NA	NA	NA	1.02974e+06	612081	861668	NA	NA	NA	NA
O09167	O09167	60S ribosomal protein L21	Rpl21	NA	3.63976e+06	3.34855e+06	1.95172e+06	17948841	2.09009e+07	1.83801e+07	2.25794e+07	9.35054e+06	NA	3.16162e+07	1.53747e+07
O09172	O09172	Glutamate--cysteine ligase regulatory subunit (GCS light chain) (Gamma-ECS regulatory subunit) (Gamma-glutamylcysteine synthetase regulatory subunit) (Glutamate--cysteine ligase modifier subunit)	Gclm	NA	NA	NA	NA	NA	NA	NA	NA	NA	NA	NA	NA
O35129	O35129	Prohibitin-2 (B-cell receptor-associated protein BAP37) (Repressor of estrogen receptor activity)	Phb2	NA	NA	NA	NA	8.92806e+06	4317688	6.50715e+06	8.89606e+06	NA	NA	7.14049e+06	NA
O35134	O35134	DNA-directed RNA polymerase I subunit RPA1 (RNA polymerase I subunit A1) (EC 2.7.7.6) (DNA-directed RNA polymerase I largest subunit) (DNA-directed RNA polymerase I subunit A) (RNA polymerase I 194 kDa subunit) (RPA194)	Polr1a	NA	NA	NA	NA	2.16258e+07	2.12419e+07	8.86358e+06	1.47786e+07	NA	NA	NA	NA
O35153	O35153	BET1-like protein (Golgi SNARE with a size of 15 kDa) (GOS-15) (GS15) (Vesicle transport protein GOS15)	Bet1l	NA	NA	NA	NA	852171	1.21348e+06	933397	474549	NA	NA	NA	NA
O35218	O35218	Cleavage and polyadenylation specificity factor subunit 2 (Cleavage and polyadenylation specificity factor 100 kDa subunit) (CPSF 100 kDa subunit)	Cpsf2	NA	NA	NA	NA	10285659	1.26837e+07	5.09493e+06	9.99848e+06	479550	NA	NA	289936
O35219-1	O35219	Potassium voltage-gated channel subfamily H member 2 (Ether-a-go-go-related gene potassium channel 1) (ERG-1) (Eag-related protein 1) (Ether-a-go-go-related protein 1) (MERG) (Voltage-gated potassium channel subunit Kv11.1)	Kcnh2	NA	NA	NA	NA	NA	NA	NA	NA	NA	NA	NA	NA
O35226	O35226	26S proteasome non-ATPase regulatory subunit 4 (26S proteasome regulatory subunit RPN10) (26S proteasome regulatory subunit S5A) (Multiubiquitin chain-binding protein)	Psmd4	NA	NA	NA	NA	1.27515e+07	1.51539e+07	7561850	9.63348e+06	NA	NA	NA	NA
O35286	O35286	ATP-dependent RNA helicase DHX15 (EC 3.6.4.13) (DEAH box protein 15)	Dhx15	NA	NA	NA	NA	1.79224e+07	1.94807e+07	1.34917e+07	1.80832e+07	1.62471e+07	3.08281e+06	7.73055e+07	1.92948e+07
O35295	O35295	Transcriptional activator protein Pur-beta (Purine-rich element-binding protein B) (Vascular actin single-stranded DNA-binding factor 2 p44 component)	Purb	NA	NA	NA	NA	631767	409719	634495	840475	NA	NA	NA	NA
O35326	O35326	Serine/arginine-rich splicing factor 5 (Delayed-early protein HRS) (Pre-mRNA-splicing factor SRP40) (Splicing factor, arginine/serine-rich 5)	Srsf5	NA	NA	NA	NA	412489	1.57669e+06	442151	657715	NA	NA	NA	NA
O35344	O35344	Importin subunit alpha-4 (Importin alpha Q2) (Qip2) (Karyopherin subunit alpha-3)	Kpna3	NA	NA	NA	NA	NA	NA	NA	NA	543363	209357	934645	391929
O35368	O35368	Interferon-activable protein 203 (Ifi-203) (Interferon-inducible protein p203)	Ifi203	NA	NA	NA	NA	1.51022e+06	1.14149e+06	797328	1.05265e+06	NA	NA	NA	NA
O35465-1	O35465	Peptidyl-prolyl cis-trans isomerase FKBP8 (PPIase FKBP8) (EC 5.2.1.8) (38 kDa FK506-binding protein) (38 kDa FKBP) (FKBP-38) (mFKBP38) (FK506-binding protein 8) (FKBP-8) (FKBPR38) (Rotamase)	Fkbp8	NA	NA	NA	NA	2687034	2.78849e+06	1.77151e+06	4218456	NA	NA	NA	NA
O35469	O35469	3 beta-hydroxysteroid dehydrogenase/Delta 5-->4-isomerase type 6 (EC 1.1.1.-) (3 beta-hydroxysteroid dehydrogenase/Delta 5-->4-isomerase type VI) (3-beta-HSD VI) [Includes: 3-beta-hydroxy-Delta(5)-steroid dehydrogenase (EC 1.1.1.145) (3-beta-hydroxy-5-ene steroid dehydrogenase) (Progesterone reductase); Steroid Delta-isomerase (EC 5.3.3.1) (Delta-5-3-ketosteroid isomerase)]	Hsd3b6	NA	NA	NA	NA	NA	NA	NA	NA	NA	65414344	NA	NA
O35492	O35492	Dual specificity protein kinase CLK3 (EC 2.7.12.1) (CDC-like kinase 3)	Clk3	NA	NA	NA	NA	NA	NA	NA	NA	2.54604e+06	NA	NA	2.34295e+06
O35551-1	O35551	Rab GTPase-binding effector protein 1 (Rabaptin-5) (Rabaptin-5alpha)	Rabep1	NA	NA	NA	NA	731192	1.05121e+06	463044	624233	NA	NA	NA	NA
O35609	O35609	Secretory carrier-associated membrane protein 3 (Secretory carrier membrane protein 3)	Scamp3	NA	NA	NA	NA	654251	634389	503546	526808	NA	NA	NA	NA
O35625-1	O35625	Axin-1 (Axis inhibition protein 1) (Protein Fused)	Axin1	NA	NA	NA	NA	NA	NA	NA	NA	149530	60417.2	225543	318971
O35632	O35632	Hyaluronidase-2 (Hyal-2) (EC 3.2.1.35) (Hyaluronoglucosaminidase-2)	Hyal2	NA	NA	NA	NA	NA	NA	NA	NA	NA	NA	NA	NA
O35638	O35638	Cohesin subunit SA-2 (SCC3 homolog 2) (Stromal antigen 2)	Stag2	NA	NA	NA	NA	NA	NA	NA	NA	NA	NA	NA	NA
O35639	O35639	Annexin A3 (35-alpha calcimedin) (Annexin III) (Annexin-3) (Lipocortin III) (Placental anticoagulant protein III) (PAP-III)	Anxa3	NA	NA	NA	461540	1.61948e+06	801156	2.42013e+06	3.34435e+06	309994	172957	4.19873e+06	702559
O35682	O35682	Myeloid-associated differentiation marker (Myeloid up-regulated protein)	Myadm	NA	NA	NA	NA	669720	1.04232e+06	658641	852429	425790	257036	970884	619303
O35685	O35685	Nuclear migration protein nudC (Nuclear distribution protein C homolog) (Silica-induced gene 92 protein) (SIG-92)	Nudc	NA	NA	NA	NA	3.14869e+06	1.29074e+07	6.05607e+06	7.38946e+06	NA	NA	NA	NA
O35691	O35691	Pinin	Pnn	NA	NA	NA	NA	1.64628e+06	6229141	NA	345644	NA	NA	NA	NA
O35711-1	O35711	Liprin-beta-2 (Coiled-coil-like protein 1) (Protein tyrosine phosphatase receptor type f polypeptide-interacting protein-binding protein 2) (PTPRF-interacting protein-binding protein 2)	Ppfibp2	NA	NA	NA	NA	NA	NA	NA	NA	252836	NA	590688	502956
O35737	O35737	Heterogeneous nuclear ribonucleoprotein H (hnRNP H) [Cleaved into: Heterogeneous nuclear ribonucleoprotein H, N-terminally processed]	Hnrnph1	5.43739e+06	3.16331e+06	1.83531e+06	8.46508e+06	4.03469e+07	32979322	2.76253e+07	3.09988e+07	5.33937e+07	1.92681e+07	9.85748e+07	4.36867e+07
O35942	O35942	Serine/threonine-protein kinase Nek2 (EC 2.7.11.1) (Never in mitosis A-related kinase 2) (NimA-related protein kinase 2)	Nek2	NA	NA	NA	NA	3505133	4366904	1.76759e+06	3.3572e+06	NA	4716667	NA	NA
O35963	O35963	Ras-related protein Rab-33B	Rab33b	NA	NA	NA	NA	7.77613e+06	7818915	4.46496e+06	9.10432e+06	2.23264e+06	3.95981e+06	NA	3.19864e+06
O54724	O54724	Caveolae-associated protein 1 (Cav-p60) (Cavin-1) (Polymerase I and transcript release factor)	Cavin1	NA	NA	NA	NA	6.90019e+07	7.89505e+07	4.45935e+07	4.68592e+07	NA	NA	NA	NA
O54774	O54774	AP-3 complex subunit delta-1 (AP-3 complex subunit delta) (Adaptor-related protein complex 3 subunit delta-1) (Delta-adaptin) (mBLVR1)	Ap3d1	NA	NA	NA	NA	1.28442e+06	1.3208e+06	1.2716e+06	1821742	NA	NA	1.59172e+06	NA
O54834	O54834	Rho GTPase-activating protein 6 (Rho-type GTPase-activating protein 6) (Rho-type GTPase-activating protein RhoGAPX-1)	Arhgap6	NA	NA	NA	NA	NA	NA	NA	NA	2.14734e+06	165751	239897	1.57619e+06
O54890	O54890	Integrin beta-3 (Platelet membrane glycoprotein IIIa) (GPIIIa) (CD antigen CD61)	Itgb3	NA	NA	NA	NA	185920	187519	112462	187879	NA	NA	NA	NA
O54916	O54916	RalBP1-associated Eps domain-containing protein 1 (RalBP1-interacting protein 1)	Reps1	NA	NA	NA	NA	200157	233645	49645.7	84061.3	NA	NA	NA	NA
O54931-1	O54931	A-kinase anchor protein 2 (AKAP-2) (AKAP expressed in kidney and lung) (AKAP-KL) (Protein kinase A-anchoring protein 2) (PRKA2)	Akap2	NA	NA	NA	NA	NA	NA	NA	NA	2.74213e+07	4.52403e+06	1.03509e+07	2.21872e+07
O54931-2	O54931	A-kinase anchor protein 2 (AKAP-2) (AKAP expressed in kidney and lung) (AKAP-KL) (Protein kinase A-anchoring protein 2) (PRKA2)	Akap2	NA	NA	NA	NA	2.08599e+08	2.43658e+08	8.04184e+07	1.02372e+08	NA	NA	NA	NA
O54946-1	O54946	DnaJ homolog subfamily B member 6 (Heat shock protein J2) (HSJ-2) (MRJ) (mDj4)	Dnajb6	NA	NA	NA	NA	NA	NA	NA	NA	NA	NA	1.65317e+06	NA
O54988-1	O54988	STE20-like serine/threonine-protein kinase (STE20-like kinase) (mSLK) (EC 2.7.11.1) (Etk4) (STE20-related kinase SMAK) (STE20-related serine/threonine-protein kinase) (STE20-related kinase) (Serine/threonine-protein kinase 2)	Slk	NA	NA	NA	NA	7.71156e+06	1.08474e+07	9.45081e+06	6.26103e+06	NA	NA	NA	NA
O55029	O55029	Coatomer subunit beta' (Beta'-coat protein) (Beta'-COP) (p102)	Copb2	NA	NA	NA	NA	NA	NA	NA	NA	NA	NA	NA	NA
O55106	O55106	Striatin	Strn	NA	NA	NA	NA	7.14314e+07	9.91162e+07	3.41569e+07	4.77236e+07	1.25375e+06	120161	1.57986e+06	1.01458e+06
O55128	O55128	Histone deacetylase complex subunit SAP18 (18 kDa Sin3-associated polypeptide) (Sin3-associated polypeptide p18)	Sap18	NA	NA	NA	NA	1.80879e+06	3139426	1.2568e+06	1.78713e+06	NA	NA	NA	NA
O55131	O55131	Septin-7 (CDC10 protein homolog)	Septin7	NA	NA	NA	NA	4.25819e+06	6.12196e+06	844765	910600	NA	NA	NA	NA
O55135	O55135	Eukaryotic translation initiation factor 6 (eIF-6) (B4 integrin interactor) (CAB) (p27(BBP))	Eif6	NA	NA	NA	NA	2.96828e+06	2.78883e+06	1.44716e+06	2.85207e+06	507760	NA	1.97294e+06	536471
O55142	O55142	60S ribosomal protein L35a	Rpl35a	NA	NA	NA	NA	6.45332e+06	9.65431e+06	4.15042e+06	5.19008e+06	665238	1.72972e+06	NA	2.01759e+06
O55143-1	O55143	Sarcoplasmic/endoplasmic reticulum calcium ATPase 2 (SERCA2) (SR Ca(2+)-ATPase 2) (EC 7.2.2.10) (Calcium pump 2) (Calcium-transporting ATPase sarcoplasmic reticulum type, slow twitch skeletal muscle isoform) (Endoplasmic reticulum class 1/2 Ca(2+) ATPase)	Atp2a2	NA	NA	NA	NA	3.4884e+07	4.45479e+07	1.05606e+07	1.23144e+07	2.54759e+07	562701	2.60339e+07	2.22891e+07
O55201	O55201	Transcription elongation factor SPT5 (DRB sensitivity-inducing factor large subunit) (DSIF large subunit)	Supt5h	NA	NA	NA	NA	NA	NA	NA	NA	697788	NA	525831	563761
O70133	O70133	ATP-dependent RNA helicase A (EC 3.6.4.13) (DEAH box protein 9) (mHEL-5) (Nuclear DNA helicase II) (NDH II) (RNA helicase A) (RHA)	Dhx9	NA	3.11619e+06	1250405	3.69988e+06	1.3043e+08	1.46914e+08	9.31338e+07	1.1355e+08	4.37575e+07	1.64413e+07	2.03289e+08	4.06543e+07
O70194	O70194	Eukaryotic translation initiation factor 3 subunit D (eIF3d) (Eukaryotic translation initiation factor 3 subunit 7) (eIF-3-zeta) (eIF3 p66)	Eif3d	NA	NA	NA	NA	1.36527e+07	2.29095e+07	5.68125e+06	8.69447e+06	2.56046e+08	5.76101e+07	1.06273e+08	1.17068e+08
O70251	O70251	Elongation factor 1-beta (EF-1-beta)	Eef1b	NA	NA	NA	NA	7.70918e+06	10570340	5.53413e+06	4.60103e+06	NA	NA	NA	NA
O70252	O70252	Heme oxygenase 2 (HO-2) (EC 1.14.14.18) [Cleaved into: Heme oxygenase 2 soluble form]	Hmox2	NA	NA	NA	NA	8.31393e+06	1.09927e+07	325960	2.29488e+07	NA	NA	NA	NA
O70279	O70279	Splicing factor ESS-2 homolog (ES2 protein) (Expressed sequence 2 embryonic lethal)	Ess2	NA	NA	NA	NA	NA	NA	NA	NA	1767777	345821	NA	NA
O70305-1	O70305	Ataxin-2 (Spinocerebellar ataxia type 2 protein homolog)	Atxn2	NA	NA	NA	NA	1.13169e+07	1.28285e+07	8.01423e+06	1.11382e+07	49050.3	NA	247146	NA
O70311	O70311	Glycylpeptide N-tetradecanoyltransferase 2 (EC 2.3.1.97) (Myristoyl-CoA:protein N-myristoyltransferase 2) (NMT 2) (Peptide N-myristoyltransferase 2) (Type II N-myristoyltransferase)	Nmt2	NA	NA	NA	NA	1.05066e+07	5.47722e+06	2.5953e+06	3.67194e+06	NA	NA	NA	NA
O70318	O70318	Band 4.1-like protein 2 (Erythrocyte membrane protein band 4.1-like 2) (Generally expressed protein 4.1) (4.1G)	Epb41l2	NA	NA	NA	NA	5.53486e+07	1.01368e+08	2.47528e+07	4.06669e+07	1.47708e+07	934329	8.22811e+06	1.0126e+07
O70325-1	O70325	Phospholipid hydroperoxide glutathione peroxidase (PHGPx) (EC 1.11.1.12) (Glutathione peroxidase 4) (GPx-4) (GSHPx-4)	Gpx4	NA	NA	NA	NA	NA	NA	NA	NA	344551	201189	1.88786e+06	NA
O70378	O70378	ER membrane protein complex subunit 8 (Neighbor of COX4)	Emc8	884838	NA	NA	NA	3.69743e+06	2.76939e+06	2.7312e+06	3.16145e+06	1.70755e+06	581594	3724943	3108957
O70400	O70400	PDZ and LIM domain protein 1 (C-terminal LIM domain protein 1) (Elfin) (LIM domain protein CLP-36)	Pdlim1	NA	NA	NA	NA	5.76627e+07	9.57743e+07	2.38157e+07	4.66244e+07	1.3781e+08	2.51359e+07	4.5194e+07	5.09838e+07
O70422	O70422	General transcription factor IIH subunit 4 (Basic transcription factor 2 52 kDa subunit) (BTF2 p52) (General transcription factor IIH polypeptide 4) (TFIIH basal transcription factor complex p52 subunit)	Gtf2h4	NA	NA	NA	NA	NA	NA	NA	NA	NA	NA	NA	NA
O70492	O70492	Sorting nexin-3 (SDP3 protein)	Snx3	NA	NA	NA	NA	2983604	4447622	1.91023e+06	2.49164e+06	NA	NA	NA	NA
O70503-1	O70503	Very-long-chain 3-oxoacyl-CoA reductase (EC 1.1.1.330) (17-beta-hydroxysteroid dehydrogenase 12) (17-beta-HSD 12) (3-ketoacyl-CoA reductase) (KAR) (Estradiol 17-beta-dehydrogenase 12) (EC 1.1.1.62) (KIK-I)	Hsd17b12	NA	NA	NA	NA	5.90454e+06	6.96692e+06	3.38253e+06	5.16553e+06	9.03513e+06	208062	1.31996e+07	8.42297e+06
O70566	O70566	Protein diaphanous homolog 2 (Diaphanous-related formin-2) (DRF2) (mDia3)	Diaph2	NA	NA	NA	NA	504839	NA	1.21627e+06	1.11586e+06	NA	NA	NA	NA
O70572	O70572	Sphingomyelin phosphodiesterase 2 (EC 3.1.4.12) (Lyso-platelet-activating factor-phospholipase C) (Lyso-PAF-PLC) (Neutral sphingomyelinase) (N-SMase) (nSMase)	Smpd2	NA	NA	NA	NA	1.6849e+07	1.25974e+07	5.9952e+06	9.25358e+06	NA	NA	NA	NA
O88271	O88271	Craniofacial development protein 1 (27 kDa craniofacial protein) (Bucentaur) (Protein Cp27)	Cfdp1	NA	NA	NA	NA	4.57493e+06	1.07709e+07	3.19155e+06	5.36682e+06	936149	NA	NA	NA
O88286	O88286	Protein Wiz (Widely-interspaced zinc finger-containing protein)	Wiz	NA	NA	NA	NA	NA	NA	NA	NA	1.18967e+06	107943	795299	892464
O88286-3	O88286	Protein Wiz (Widely-interspaced zinc finger-containing protein)	Wiz	NA	NA	NA	NA	3.96974e+07	5.41043e+07	2.32355e+07	3.13264e+07	NA	NA	NA	NA
O88291-1	O88291	DBIRD complex subunit ZNF326 (Zinc finger protein 326) (Zinc finger protein interacting with mRNPs) (Zinc finger protein-associated with nuclear matrix of 75 kDa)	Znf326	NA	NA	NA	NA	1.74129e+06	2.0732e+06	1.41368e+06	1.5383e+06	548688	NA	NA	1.02739e+06
O88447	O88447	Kinesin light chain 1 (KLC 1)	Klc1	NA	NA	NA	NA	231831	486725	200727	240660	NA	NA	NA	NA
O88466-1	O88466	Zinc finger protein 106 (Zfp-106) (H3a minor histocompatibility antigen) (Son of insulin receptor mutant) (Zinc finger protein 474)	Znf106	NA	NA	NA	NA	5153603	4299765	3.03188e+06	4.24995e+06	NA	NA	NA	NA
O88522	O88522	NF-kappa-B essential modulator (NEMO) (IkB kinase-associated protein 1) (IKKAP1) (mFIP-3) (Inhibitor of nuclear factor kappa-B kinase subunit gamma) (I-kappa-B kinase subunit gamma) (IKK-gamma) (IKKG) (IkB kinase subunit gamma) (NF-kappa-B essential modifier)	Ikbkg	NA	NA	NA	NA	1.75205e+06	2.8427e+06	741000	649976	7.49408e+06	279831	NA	2.34206e+06
O88531	O88531	Palmitoyl-protein thioesterase 1 (PPT-1) (EC 3.1.2.22) (Palmitoyl-protein hydrolase 1)	Ppt1	NA	NA	NA	NA	NA	NA	NA	NA	912577	1.72864e+06	1.8583e+06	4.15648e+06
O88532	O88532	Zinc finger RNA-binding protein	Zfr	NA	NA	NA	NA	5.19301e+07	5.30643e+07	3.07363e+07	3.70236e+07	324466	227477	2.5667e+06	1.27645e+06
O88569	O88569	Heterogeneous nuclear ribonucleoproteins A2/B1 (hnRNP A2/B1)	Hnrnpa2b1	NA	5.12454e+06	6.14284e+06	3.88851e+06	427694914	5.0056e+08	2.70261e+08	3.08984e+08	7.65811e+08	3.76599e+08	5.18336e+08	4.58142e+08
O88587-1	O88587	Catechol O-methyltransferase (EC 2.1.1.6)	Comt	NA	NA	NA	NA	NA	NA	NA	NA	NA	NA	NA	NA
O88696	O88696	ATP-dependent Clp protease proteolytic subunit, mitochondrial (EC 3.4.21.92) (Endopeptidase Clp)	Clpp	NA	NA	NA	NA	6.77533e+06	6.30687e+06	2.10155e+06	1.10369e+06	3171782	NA	3.77046e+06	3.82039e+06
O88737	O88737	Protein bassoon	Bsn	NA	NA	NA	NA	NA	NA	NA	NA	NA	NA	NA	NA
O88738	O88738	Baculoviral IAP repeat-containing protein 6 (EC 2.3.2.27) (BIR repeat-containing ubiquitin-conjugating enzyme) (BRUCE) (RING-type E3 ubiquitin transferase BIRC6) (Ubiquitin-conjugating BIR domain enzyme apollon) (APOLLON)	Birc6	NA	NA	NA	NA	477760	818773	427780	544719	NA	NA	NA	NA
O88792	O88792	Junctional adhesion molecule A (JAM-A) (Junctional adhesion molecule 1) (JAM-1) (CD antigen CD321)	F11r	NA	NA	NA	NA	221477	NA	291553	354109	NA	NA	NA	NA
O88811-1	O88811	Signal transducing adapter molecule 2 (STAM-2) (Hrs-binding protein)	Stam2	NA	NA	NA	NA	NA	NA	NA	NA	NA	NA	NA	NA
O88845-1	O88845	A-kinase anchor protein 10, mitochondrial (AKAP-10) (Dual specificity A kinase-anchoring protein 2) (D-AKAP-2) (Protein kinase A-anchoring protein 10) (PRKA10)	Akap10	NA	NA	NA	NA	NA	NA	NA	NA	1.7135e+07	1.06638e+06	7.05545e+06	6.24565e+06
O88907	O88907	E3 SUMO-protein ligase PIAS1 (EC 2.3.2.27) (DEAD/H box-binding protein 1) (Protein inhibitor of activated STAT protein 1) (RING-type E3 ubiquitin transferase PIAS1)	Pias1	NA	NA	NA	NA	934142	636920	659803	820470	NA	NA	NA	NA
O89032-1	O89032	SH3 and PX domain-containing protein 2A (Five SH3 domain-containing protein) (SH3 multiple domains protein 1) (Tyrosine kinase substrate with five SH3 domains)	Sh3pxd2a	NA	NA	NA	NA	NA	NA	NA	NA	3.5988e+06	1.03758e+06	2.37358e+06	2.53005e+06
O89033	O89033	Cell division control protein 6 homolog (CDC6-related protein) (p62(cdc6))	Cdc6	NA	NA	NA	NA	NA	NA	NA	NA	3.53864e+06	NA	NA	NA
O89051	O89051	Integral membrane protein 2B (Immature BRI2) (imBRI2) (Protein E25B) (Transmembrane protein BRI) (Bri) [Cleaved into: BRI2, membrane form (Mature BRI2) (mBRI2); BRI2 intracellular domain (BRI2 ICD); BRI2C, soluble form; Bri23 peptide (Bri2-23) (ABri23) (C-terminal peptide) (P23 peptide)]	Itm2b	NA	NA	NA	NA	NA	NA	NA	NA	NA	124075	2994346	NA
O89090	O89090	Transcription factor Sp1 (Specificity protein 1)	Sp1	NA	NA	NA	NA	NA	NA	NA	NA	NA	NA	NA	NA
O89103	O89103	Complement component C1q receptor (C1q/MBL/SPA receptor) (C1qR(p)) (C1qRp) (Cell surface antigen AA4) (Complement component 1 q subcomponent receptor 1) (Lymphocyte antigen 68) (Ly-68) (CD antigen CD93)	Cd93	NA	NA	NA	NA	NA	NA	NA	NA	NA	NA	1.30109e+06	828794
O89110	O89110	Caspase-8 (CASP-8) (EC 3.4.22.61) [Cleaved into: Caspase-8 subunit p18; Caspase-8 subunit p10]	Casp8	NA	NA	NA	NA	4.13704e+06	7.2615e+06	2.40896e+06	3.64186e+06	3.56935e+06	266361	840598	1.04877e+06
P00405	P00405	Cytochrome c oxidase subunit 2 (EC 7.1.1.9) (Cytochrome c oxidase polypeptide II)	Mtco2	1.19242e+06	6.65389e+06	3001322	3357420	3118768	6364771	7095055	7.66551e+06	2726337	4058909	NA	2.94589e+06
P01869	P01869	Ig gamma-1 chain C region, membrane-bound form	Ighg1	NA	NA	NA	NA	285767	NA	2.97455e+06	NA	1.63647e+06	701451	13725277	NA
P01899	P01899	H-2 class I histocompatibility antigen, D-B alpha chain (H-2D(B))	H2-D1	NA	NA	NA	NA	1.27673e+07	1.48326e+07	1.22716e+07	1.5348e+07	1.11651e+07	2.38721e+06	4.82834e+07	2.44539e+07
P01901	P01901	H-2 class I histocompatibility antigen, K-B alpha chain (H-2K(B))	H2-K1	NA	NA	NA	NA	1.87238e+06	3.69444e+06	1.59429e+06	2.92643e+06	NA	NA	NA	NA
P01942	P01942	Hemoglobin subunit alpha (Alpha-globin) (Hemoglobin alpha chain) [Cleaved into: Hemopressin]	Hba	96567.4	471434	1.34657e+06	501174	1.61005e+06	2.20399e+06	2.33576e+06	2.83538e+06	NA	447304	2.57884e+06	2.62036e+06
P02088	P02088	Hemoglobin subunit beta-1 (Beta-1-globin) (Hemoglobin beta-1 chain) (Hemoglobin beta-major chain)	Hbb-b1	NA	NA	5.9405e+06	NA	NA	NA	NA	NA	NA	NA	NA	NA
P02340	P02340	Cellular tumor antigen p53 (Tumor suppressor p53)	Tp53	NA	NA	NA	NA	764335	827369	205694	116697	NA	NA	NA	NA
P02463	P02463	Collagen alpha-1(IV) chain [Cleaved into: Arresten]	Col4a1	NA	NA	NA	NA	NA	318340	378394	217196	NA	NA	NA	NA
P02535-1	P02535	Keratin, type I cytoskeletal 10 (56 kDa cytokeratin) (Cytokeratin-10) (CK-10) (Keratin, type I cytoskeletal 59 kDa) (Keratin-10) (K10)	Krt10	8.29476e+06	2.04503e+07	1.52398e+08	4.93369e+07	1.53369e+08	6.33187e+07	2.11591e+08	2.12085e+07	1.00145e+08	1.72091e+08	309161364	2.74983e+07
P04104	P04104	Keratin, type II cytoskeletal 1 (67 kDa cytokeratin) (Cytokeratin-1) (CK-1) (Keratin-1) (K1) (Type-II keratin Kb1)	Krt1	6.65878e+07	1.15349e+08	3.67932e+08	2.08121e+08	2.76371e+08	177312445	4.59151e+08	1.09924e+08	2.83087e+08	5.75499e+08	1.70674e+09	1.81163e+08
P05064	P05064	Fructose-bisphosphate aldolase A (EC 4.1.2.13) (Aldolase 1) (Muscle-type aldolase)	Aldoa	NA	NA	NA	NA	1.44464e+06	2.13147e+06	1.23274e+06	1.74281e+06	872273	750577	1.6385e+07	1.47345e+06
P05132-1	P05132	cAMP-dependent protein kinase catalytic subunit alpha (PKA C-alpha) (EC 2.7.11.11)	Prkaca	NA	NA	NA	NA	NA	NA	NA	NA	3.75818e+06	40771.6	333014	1.72187e+06
P05202	P05202	Aspartate aminotransferase, mitochondrial (mAspAT) (EC 2.6.1.1) (EC 2.6.1.7) (Fatty acid-binding protein) (FABP-1) (Glutamate oxaloacetate transaminase 2) (Kynurenine aminotransferase 4) (Kynurenine aminotransferase IV) (Kynurenine--oxoglutarate transaminase 4) (Kynurenine--oxoglutarate transaminase IV) (Plasma membrane-associated fatty acid-binding protein) (FABPpm) (Transaminase A)	Got2	NA	2.30564e+06	1.30129e+06	1.42095e+06	4.32233e+06	1.0595e+07	8.75658e+06	8.22001e+06	2.60303e+06	171785	17201487	9.58283e+06
P05213	P05213	Tubulin alpha-1B chain (EC 3.6.5.-) (Alpha-tubulin 2) (Alpha-tubulin isotype M-alpha-2) (Tubulin alpha-2 chain) [Cleaved into: Detyrosinated tubulin alpha-1B chain]	Tuba1b	NA	NA	NA	NA	NA	NA	NA	NA	2.55801e+08	8.05578e+07	2.31933e+08	1.26526e+08
P05480	P05480	Proto-oncogene tyrosine-protein kinase Src (EC 2.7.10.2) (Proto-oncogene c-Src) (pp60c-src) (p60-Src)	Src	NA	NA	NA	NA	NA	NA	NA	NA	NA	NA	NA	NA
P05627	P05627	Transcription factor Jun (AH119) (Activator protein 1) (AP1) (Proto-oncogene c-Jun) (Transcription factor AP-1 subunit Jun) (V-jun avian sarcoma virus 17 oncogene homolog) (Jun A)	Jun	NA	NA	NA	NA	6.61003e+06	8.86993e+06	3.21512e+06	4.58801e+06	3.28118e+06	511642	983992	3.09047e+06
P06151	P06151	L-lactate dehydrogenase A chain (LDH-A) (EC 1.1.1.27) (LDH muscle subunit) (LDH-M)	Ldha	3.821e+06	3.14873e+06	3.41793e+06	5.72044e+06	1.38118e+07	2.16094e+07	1.39735e+07	1.44449e+07	9.90309e+06	5.41906e+06	44026789	1.10125e+07
P06537-1	P06537	Glucocorticoid receptor (GR) (Nuclear receptor subfamily 3 group C member 1)	Nr3c1	NA	NA	NA	NA	6.78547e+06	5.28893e+06	5.92078e+06	7.17845e+06	337825	NA	NA	112673
P06745	P06745	Glucose-6-phosphate isomerase (GPI) (EC 5.3.1.9) (Autocrine motility factor) (AMF) (Neuroleukin) (NLK) (Phosphoglucose isomerase) (PGI) (Phosphohexose isomerase) (PHI)	Gpi	NA	NA	NA	NA	NA	NA	NA	NA	NA	NA	3.69533e+06	NA
P07091	P07091	Protein S100-A4 (Metastasin) (Metastatic cell protein) (PEL98) (Placental calcium-binding protein) (Protein 18A2) (Protein Mts1) (S100 calcium-binding protein A4)	S100a4	NA	512507	661872	1.27375e+06	1.10662e+07	1.13044e+07	1.54801e+07	17775833	2.31039e+06	1.68342e+06	8973248	3.9515e+06
P07356	P07356	Annexin A2 (Annexin II) (Annexin-2) (Calpactin I heavy chain) (Calpactin-1 heavy chain) (Chromobindin-8) (Lipocortin II) (Placental anticoagulant protein IV) (PAP-IV) (Protein I) (p36)	Anxa2	2.60264e+07	1.0344e+08	8.78863e+07	1.0319e+08	2.88435e+09	1.28874e+09	1.70608e+09	2.23782e+09	9.61713e+08	3.70883e+08	1.53291e+09	6.98471e+08
P07724	P07724	Albumin	Alb	NA	NA	NA	NA	NA	NA	NA	NA	439848	1.40633e+06	2.78533e+06	723121
P07901	P07901	Heat shock protein HSP 90-alpha (EC 3.6.4.10) (Heat shock 86 kDa) (HSP 86) (HSP86) (Tumor-specific transplantation 86 kDa antigen) (TSTA)	Hsp90aa1	NA	NA	NA	NA	9.64792e+06	9.29554e+06	3.31935e+06	4600650	944285	280128	2.41213e+06	1.33499e+06
P08003	P08003	Protein disulfide-isomerase A4 (EC 5.3.4.1) (Endoplasmic reticulum resident protein 72) (ER protein 72) (ERp-72) (ERp72)	Pdia4	NA	NA	NA	NA	727142	738788	894992	1.05702e+06	NA	104433	1.39839e+06	547272
P08103-1	P08103	Tyrosine-protein kinase HCK (EC 2.7.10.2) (B-cell/myeloid kinase) (BMK) (Hematopoietic cell kinase) (Hemopoietic cell kinase) (p56-HCK/p59-HCK)	Hck	NA	NA	NA	NA	NA	NA	NA	NA	537918	379222	374244	381977
P08113	P08113	Endoplasmin (94 kDa glucose-regulated protein) (GRP-94) (Endoplasmic reticulum resident protein 99) (ERp99) (Heat shock protein 90 kDa beta member 1) (Polymorphic tumor rejection antigen 1) (Tumor rejection antigen gp96)	Hsp90b1	1.05909e+07	7.0036e+07	7.16816e+07	6.19138e+07	2.08798e+08	2.26147e+08	1.04701e+08	1.59134e+08	2.31765e+08	7.7151e+07	3.53532e+08	2.10042e+08
P08122	P08122	Collagen alpha-2(IV) chain [Cleaved into: Canstatin]	Col4a2	NA	NA	NA	NA	178066	1283664	1.68303e+06	403170	NA	NA	NA	NA
P08207	P08207	Protein S100-A10 (Calpactin I light chain) (Calpactin-1 light chain) (Cellular ligand of annexin II) (S100 calcium-binding protein A10) (p10 protein) (p11)	S100a10	NA	580861	NA	4.15549e+06	8.25851e+07	4.12304e+07	9.82109e+07	1.31383e+08	3.10862e+07	2.10638e+07	2.1905e+07	3.64523e+07
P08249	P08249	Malate dehydrogenase, mitochondrial (EC 1.1.1.37)	Mdh2	303093	1.01772e+06	1.84235e+06	1.19841e+06	3.6385e+06	1.02485e+07	7.37787e+06	1.11502e+07	173858	896734	9.82346e+06	1.24235e+06
P08556	P08556	GTPase NRas (EC 3.6.5.2) (Transforming protein N-Ras)	Nras	NA	NA	NA	NA	7.36643e+06	8.81812e+06	3.56069e+06	4.44161e+06	6989211	NA	4.47306e+06	4.09536e+06
P08752	P08752	Guanine nucleotide-binding protein G(i) subunit alpha-2 (Adenylate cyclase-inhibiting G alpha protein)	Gnai2	8.55142e+06	2.97552e+07	2.41717e+07	2.70907e+07	8.28566e+07	8.42964e+07	4.91426e+07	6.96414e+07	6.32555e+07	3.76219e+07	1.56538e+08	72437391
P08775	P08775	DNA-directed RNA polymerase II subunit RPB1 (RNA polymerase II subunit B1) (EC 2.7.7.6) (DNA-directed RNA polymerase II subunit A) (DNA-directed RNA polymerase III largest subunit)	Polr2a	NA	NA	NA	NA	2.71655e+06	4.05258e+06	1.00117e+06	2.25609e+06	295451	NA	NA	1.10219e+06
P09055	P09055	Integrin beta-1 (Fibronectin receptor subunit beta) (VLA-4 subunit beta) (CD antigen CD29)	Itgb1	NA	575816	483171	519546	3.76713e+07	5.21811e+07	2.34469e+07	3.04572e+07	889658	655230	184207	991739
P09103	P09103	Protein disulfide-isomerase (PDI) (EC 5.3.4.1) (Cellular thyroid hormone-binding protein) (Endoplasmic reticulum resident protein 59) (ER protein 59) (ERp59) (Prolyl 4-hydroxylase subunit beta) (p55)	P4hb	245276	532918	417348	546165	2.81341e+06	2.66849e+06	2514543	1.35734e+06	NA	206853	12532206	984118
P09405	P09405	Nucleolin (Protein C23)	Ncl	NA	NA	NA	NA	7.99969e+08	9.94214e+08	3.81008e+08	5.35566e+08	4.15076e+06	923505	2.27687e+07	4.52944e+06
P09411	P09411	Phosphoglycerate kinase 1 (EC 2.7.2.3)	Pgk1	NA	NA	437277	NA	2.86381e+06	5.98194e+06	2.42217e+06	4.09262e+06	2.10243e+06	NA	3.65205e+06	2.02546e+06
P09450	P09450	Transcription factor JunB (MyD21) (Transcription factor AP-1 subunit JunB)	Junb	NA	NA	NA	NA	8656093	9.41166e+06	4.39195e+06	5.15844e+06	3.10973e+06	792148	1.68899e+06	1.29554e+06
P09528	P09528	Ferritin heavy chain (Ferritin H subunit) (EC 1.16.3.1) [Cleaved into: Ferritin heavy chain, N-terminally processed]	Fth1	NA	NA	NA	NA	NA	NA	NA	NA	NA	273227	1.53348e+06	73032.8
P0DOV2	P0DOV2	Interferon-activable protein 204 (Ifi-204) (Interferon-inducible protein p204)	Ifi204	NA	NA	NA	NA	NA	NA	NA	NA	NA	NA	NA	NA
P10107	P10107	Annexin A1 (Annexin I) (Annexin-1) (Calpactin II) (Calpactin-2) (Chromobindin-9) (Lipocortin I) (Phospholipase A2 inhibitory protein) (p35) [Cleaved into: Annexin Ac2-26]	Anxa1	2.15149e+06	1626805	1.2375e+06	1.14457e+06	9.74876e+06	1.26488e+07	1.98091e+07	7.06594e+06	2.21289e+08	1.57475e+08	9.71932e+08	1.37078e+08
P10126	P10126	Elongation factor 1-alpha 1 (EF-1-alpha-1) (Elongation factor Tu) (EF-Tu) (Eukaryotic elongation factor 1 A-1) (eEF1A-1)	Eef1a1	19445811	5.96945e+07	5.11815e+07	5.51187e+07	2.82807e+08	5.84988e+08	1.87168e+08	2.54562e+08	2.67787e+08	1.31988e+08	3.61893e+08	1.2968e+08
P10630-1	P10630	Eukaryotic initiation factor 4A-II (eIF-4A-II) (eIF4A-II) (EC 3.6.4.13) (ATP-dependent RNA helicase eIF4A-2)	Eif4a2	NA	NA	NA	NA	NA	NA	NA	NA	573008	NA	2166559	252332
P10639	P10639	Thioredoxin (Trx) (ATL-derived factor) (ADF)	Txn	NA	NA	NA	NA	NA	NA	NA	NA	NA	NA	17338338	250385
P10833	P10833	Ras-related protein R-Ras (EC 3.6.5.-) (p23)	Rras	NA	NA	NA	NA	2.89359e+06	5.67044e+06	1.8026e+06	NA	279522	NA	4.89608e+06	NA
P10852	P10852	4F2 cell-surface antigen heavy chain (4F2hc) (Solute carrier family 3 member 2) (CD antigen CD98)	Slc3a2	NA	NA	NA	NA	2.49315e+07	46201662	1.26123e+07	2.29675e+07	2.91359e+06	1.27598e+06	2724569	1.56664e+06
P10922	P10922	Histone H1.0 (Histone H1') (Histone H1(0)) (MyD196) [Cleaved into: Histone H1.0, N-terminally processed]	H1-0	NA	6.9842e+06	2.63107e+06	256586	2.35362e+06	8.25831e+06	4.22474e+06	3.30856e+06	3.33605e+06	235603	NA	622084
P11440	P11440	Cyclin-dependent kinase 1 (CDK1) (EC 2.7.11.22) (EC 2.7.11.23) (Cell division control protein 2 homolog) (Cell division protein kinase 1) (p34 protein kinase)	Cdk1	NA	NA	NA	NA	3228441600	3854870272	4096344320	3.97414e+09	NA	NA	NA	NA
P11499	P11499	Heat shock protein HSP 90-beta (Heat shock 84 kDa) (HSP 84) (HSP84) (Tumor-specific transplantation 84 kDa antigen) (TSTA)	Hsp90ab1	NA	2.84976e+07	2.02918e+07	2.86319e+07	1.30294e+08	194529525	5.88497e+07	1.15131e+08	9.21689e+07	1.15241e+07	1.49366e+08	7.04496e+07
P11672	P11672	Neutrophil gelatinase-associated lipocalin (NGAL) (Lipocalin-2) (Oncogene 24p3) (24p3) (SV-40-induced 24p3 protein) (Siderocalin LCN2) (p25)	Lcn2	NA	NA	NA	NA	663103	2.28991e+06	397971	411396	NA	NA	NA	NA
P11679	P11679	Keratin, type II cytoskeletal 8 (Cytokeratin endo A) (Cytokeratin-8) (CK-8) (Keratin-8) (K8) (Type-II keratin Kb8)	Krt8	143373	592697	NA	1164154	1.19103e+06	1.2838e+06	846710	1.35321e+06	903881	421537	NA	688467
P11881-1	P11881	Inositol 1,4,5-trisphosphate receptor type 1 (IP3 receptor isoform 1) (IP3R 1) (InsP3R1) (Inositol 1,4,5-trisphosphate-binding protein P400) (Protein PCD-6) (Purkinje cell protein 1) (Type 1 inositol 1,4,5-trisphosphate receptor) (Type 1 InsP3 receptor)	Itpr1	NA	NA	NA	NA	NA	NA	NA	NA	NA	267451	11223836	NA
P11928	P11928	2'-5'-oligoadenylate synthase 1A ((2-5')oligo(A) synthase 1A) (2-5A synthase 1A) (EC 2.7.7.84) (p42 OAS)	Oas1a	NA	NA	NA	NA	1.87636e+07	2.61728e+07	8.27099e+06	9.24253e+06	1.82013e+07	NA	1.47991e+06	8.65996e+06
P11983	P11983	T-complex protein 1 subunit alpha (TCP-1-alpha) (CCT-alpha) (Tailless complex polypeptide 1A) (TCP-1-A) (Tailless complex polypeptide 1B) (TCP-1-B)	Tcp1	1168304	NA	NA	971787	1.14372e+07	2.87937e+07	5.11467e+06	7.71778e+06	2.76413e+07	3.95953e+06	3.58402e+07	1.26364e+07
P12367	P12367	cAMP-dependent protein kinase type II-alpha regulatory subunit	Prkar2a	NA	NA	NA	NA	1.65005e+07	2.307e+07	8.557e+06	1.18565e+07	NA	NA	NA	NA
P12382	P12382	ATP-dependent 6-phosphofructokinase, liver type (ATP-PFK) (PFK-L) (EC 2.7.1.11) (6-phosphofructokinase type B) (Phosphofructo-1-kinase isozyme B) (PFK-B) (Phosphohexokinase)	Pfkl	NA	NA	NA	NA	1.80903e+06	3.26535e+06	1.28656e+06	1.34633e+06	NA	NA	592393	NA
P12970	P12970	60S ribosomal protein L7a (Surfeit locus protein 3)	Rpl7a	1.59481e+06	4.08718e+07	1.99973e+07	2.52631e+07	1.27705e+08	8.92327e+07	8.02686e+07	9.50782e+07	7.27493e+07	3.63468e+07	1.20062e+08	8.98175e+07
P13864	P13864	DNA (cytosine-5)-methyltransferase 1 (Dnmt1) (Met-1) (EC 2.1.1.37) (DNA methyltransferase MmuI) (DNA MTase MmuI) (M.MmuI) (MCMT)	Dnmt1	NA	NA	NA	NA	NA	NA	NA	NA	NA	NA	NA	NA
P14069	P14069	Protein S100-A6 (5B10) (Calcyclin) (Prolactin receptor-associated protein) (S100 calcium-binding protein A6)	S100a6	NA	NA	NA	NA	6.31086e+06	2.58218e+06	4.32172e+06	4.80685e+06	928449	287311	7.73393e+06	541748
P14115	P14115	60S ribosomal protein L27a (L29)	Rpl27a	NA	2.13995e+06	3438185	102117	3.8596e+07	41540517	1.4618e+07	3.22454e+07	2.92614e+07	865414	21217569	2.58704e+07
P14131	P14131	40S ribosomal protein S16	Rps16	2021303	1.60331e+07	1.45072e+07	1.46517e+07	3.6646e+07	3.32973e+07	2.04055e+07	2.23876e+07	5.25446e+07	1.14758e+07	7.63858e+07	4.07624e+07
P14148	P14148	60S ribosomal protein L7	Rpl7	275589	6.95833e+06	4.98876e+06	5.69584e+06	4.31094e+07	4.49714e+07	2.94599e+07	3.32911e+07	2.83163e+07	1.48243e+07	3.11309e+07	2.02144e+07
P14206	P14206	40S ribosomal protein SA (37 kDa laminin receptor precursor) (37LRP) (37 kDa oncofetal antigen) (37/67 kDa laminin receptor) (LRP/LR) (67 kDa laminin receptor) (67LR) (Laminin receptor 1) (LamR) (Laminin-binding protein precursor p40) (LBP/p40) (OFA/iLRP)	Rpsa	NA	3.5902e+06	3.24719e+06	1.84928e+06	7.75196e+06	5.21938e+06	6.10624e+06	6.05155e+06	6.25957e+06	1390605	9.07476e+06	6.10628e+06
P14576-1	P14576	Signal recognition particle subunit SRP54 (EC 3.6.5.-) (Signal recognition particle 54 kDa protein)	Srp54	NA	NA	NA	NA	1.70902e+06	2.10059e+06	1.242e+06	1.44046e+06	NA	NA	NA	NA
P14685	P14685	26S proteasome non-ATPase regulatory subunit 3 (26S proteasome regulatory subunit RPN3) (26S proteasome regulatory subunit S3) (Proteasome subunit p58) (Transplantation antigen P91A) (Tum-P91A antigen)	Psmd3	NA	NA	NA	NA	NA	NA	NA	NA	NA	NA	1.20006e+06	NA
P14824	P14824	Annexin A6 (67 kDa calelectrin) (Annexin VI) (Annexin-6) (Calphobindin-II) (CPB-II) (Chromobindin-20) (Lipocortin VI) (Protein III) (p68) (p70)	Anxa6	NA	NA	NA	NA	NA	NA	NA	NA	NA	362274	1.76774e+06	114124
P14869	P14869	60S acidic ribosomal protein P0 (60S ribosomal protein L10E)	Rplp0	967955	1.44995e+06	1.64786e+06	930641	4.68743e+06	4.5756e+06	1507955	711849	6.78734e+06	2.25253e+06	2.44914e+07	8.91185e+06
P14873	P14873	Microtubule-associated protein 1B (MAP-1B) (MAP1(X)) (MAP1.2) [Cleaved into: MAP1B heavy chain; MAP1 light chain LC1]	Map1b	NA	NA	NA	NA	1.923e+07	1.8627e+07	1.43711e+07	1.68145e+07	NA	NA	NA	NA
P14901	P14901	Heme oxygenase 1 (HO-1) (EC 1.14.14.18) (P32 protein) [Cleaved into: Heme oxygenase 1 soluble form]	Hmox1	NA	NA	NA	NA	1.37126e+06	1.66652e+06	1266176	1.2317e+06	373367	524114	1.51916e+06	623766
P15066	P15066	Transcription factor JunD (Transcription factor AP-1 subunit JunD)	Jund	NA	NA	NA	NA	1.99525e+06	2.51463e+06	987086	1.04657e+06	NA	NA	NA	NA
P15306	P15306	Thrombomodulin (TM) (Fetomodulin) (CD antigen CD141)	Thbd	NA	NA	NA	NA	1.34737e+07	2.50158e+07	7.15821e+06	9.83204e+06	1.56002e+06	626978	4014421	1.69261e+06
P15379-14	P15379	CD44 antigen (Extracellular matrix receptor III) (ECMR-III) (GP90 lymphocyte homing/adhesion receptor) (HUTCH-I) (Hermes antigen) (Hyaluronate receptor) (Lymphocyte antigen 24) (Ly-24) (Phagocytic glycoprotein 1) (PGP-1) (Phagocytic glycoprotein I) (PGP-I) (CD antigen CD44)	Cd44	NA	NA	NA	NA	3.25576e+06	6.69544e+06	2.54809e+06	4.19194e+06	NA	NA	NA	NA
P15864	P15864	Histone H1.2 (H1 VAR.1) (H1c)	H1-2	NA	328884	NA	NA	838881	3.22464e+06	1.24038e+06	1.09803e+06	NA	NA	NA	NA
P16014	P16014	Secretogranin-1 (Chromogranin-B) (CgB) (Secretogranin I) (SgI) [Cleaved into: CCB peptide; PE-11]	Chgb	NA	NA	NA	NA	NA	NA	NA	NA	1.26799e+06	NA	6.8944e+06	1.52621e+06
P16045	P16045	Galectin-1 (Gal-1) (14 kDa lectin) (Beta-galactoside-binding lectin L-14-I) (Galaptin) (Lactose-binding lectin 1) (Lectin galactoside-binding soluble 1) (S-Lac lectin 1)	Lgals1	NA	NA	NA	NA	351028	403014	473613	NA	NA	NA	NA	NA
P16125	P16125	L-lactate dehydrogenase B chain (LDH-B) (EC 1.1.1.27) (LDH heart subunit) (LDH-H)	Ldhb	NA	NA	NA	NA	NA	NA	NA	NA	452675	296816	1.57942e+07	584092
P16460	P16460	Argininosuccinate synthase (EC 6.3.4.5) (Citrulline--aspartate ligase)	Ass1	NA	NA	NA	NA	NA	840606	142988	217931	835451	NA	NA	219808
P16546	P16546	Spectrin alpha chain, non-erythrocytic 1 (Alpha-II spectrin) (Fodrin alpha chain)	Sptan1	NA	NA	NA	NA	1.06957e+08	1.26741e+08	1.07191e+08	1.39229e+08	1.27381e+08	1.82205e+07	2.4965e+08	5.05574e+07
P16546-2	P16546	Spectrin alpha chain, non-erythrocytic 1 (Alpha-II spectrin) (Fodrin alpha chain)	Sptan1	NA	NA	NA	NA	NA	NA	NA	NA	NA	NA	NA	NA
P16858	P16858	Glyceraldehyde-3-phosphate dehydrogenase (GAPDH) (EC 1.2.1.12) (Peptidyl-cysteine S-nitrosylase GAPDH) (EC 2.6.99.-)	Gapdh	6.86816e+07	5.23175e+07	4.08855e+07	4.93686e+07	7.29135e+07	1.92043e+08	6.39429e+07	6.34832e+07	1.4193e+08	4.90038e+07	1.85962e+08	5.79847e+07
P16951	P16951	Cyclic AMP-dependent transcription factor ATF-2 (cAMP-dependent transcription factor ATF-2) (Activating transcription factor 2) (MXBP protein) (cAMP response element-binding protein CRE-BP1)	Atf2	NA	NA	NA	NA	966931	944934	537021	787720	NA	NA	NA	NA
P17095-1	P17095	High mobility group protein HMG-I/HMG-Y (HMG-I(Y)) (High mobility group AT-hook protein 1) (High mobility group protein A1)	Hmga1	NA	NA	NA	NA	NA	1.59548e+06	315555	394141	NA	NA	NA	NA
P17182	P17182	Alpha-enolase (EC 4.2.1.11) (2-phospho-D-glycerate hydro-lyase) (Enolase 1) (Non-neural enolase) (NNE)	Eno1	NA	8417254	7.72961e+06	8135882	2.87825e+07	6.87406e+07	1.74466e+07	2.5525e+07	72056499	9.33676e+06	32736858	6.29883e+07
P17225	P17225	Polypyrimidine tract-binding protein 1 (PTB) (Heterogeneous nuclear ribonucleoprotein I) (hnRNP I)	Ptbp1	NA	792215	NA	4.41191e+06	8.08722e+06	6.17043e+06	4.81535e+06	6.94316e+06	1.49416e+07	7.0078e+06	9.4365e+07	1.74583e+07
P17426	P17426	AP-2 complex subunit alpha-1 (100 kDa coated vesicle protein A) (Adaptor protein complex AP-2 subunit alpha-1) (Adaptor-related protein complex 2 subunit alpha-1) (Alpha-adaptin A) (Alpha1-adaptin) (Clathrin assembly protein complex 2 alpha-A large chain) (Plasma membrane adaptor HA2/AP2 adaptin alpha A subunit)	Ap2a1	NA	NA	NA	NA	NA	NA	NA	NA	3.3336e+06	1.92423e+06	1.42397e+07	4.26318e+06
P17427	P17427	AP-2 complex subunit alpha-2 (100 kDa coated vesicle protein C) (Adaptor protein complex AP-2 subunit alpha-2) (Adaptor-related protein complex 2 subunit alpha-2) (Alpha-adaptin C) (Alpha2-adaptin) (Clathrin assembly protein complex 2 alpha-C large chain) (Plasma membrane adaptor HA2/AP2 adaptin alpha C subunit)	Ap2a2	NA	NA	NA	NA	3.74853e+06	6690281	2559679	2.94534e+06	NA	NA	NA	NA
P17710-1	P17710	Hexokinase-1 (EC 2.7.1.1) (Hexokinase type I) (HK I) (Hexokinase, tumor isozyme)	Hk1	NA	NA	NA	NA	1.14415e+07	1.13566e+07	5.54276e+06	6.28954e+06	1.6318e+07	5.33856e+06	3.42586e+07	1.63962e+07
P17742	P17742	Peptidyl-prolyl cis-trans isomerase A (PPIase A) (EC 5.2.1.8) (Cyclophilin A) (Cyclosporin A-binding protein) (Rotamase A) (SP18) [Cleaved into: Peptidyl-prolyl cis-trans isomerase A, N-terminally processed]	Ppia	NA	10076587	NA	10246178	11758409	11493965	11633092	10921619	1.2769e+07	10685219	1.60749e+07	1.44489e+07
P17751	P17751	Triosephosphate isomerase (TIM) (EC 5.3.1.1) (Methylglyoxal synthase) (EC 4.2.3.3) (Triose-phosphate isomerase)	Tpi1	NA	1.22202e+06	1071062	751196	4.19932e+06	5.77612e+06	4.14923e+06	5.36643e+06	2.64506e+06	1.06516e+06	4.16388e+06	5.02901e+06
P17809	P17809	Solute carrier family 2, facilitated glucose transporter member 1 (Glucose transporter type 1, erythrocyte/brain) (GLUT-1) (GT1)	Slc2a1	NA	NA	NA	NA	NA	2.08654e+06	1.62086e+06	1.89928e+06	1375077	NA	4485770	1.83615e+06
P17897	P17897	Lysozyme C-1 (EC 3.2.1.17) (1,4-beta-N-acetylmuramidase C) (Lysozyme C type P)	Lyz1	NA	NA	NA	NA	NA	NA	NA	NA	NA	NA	3.01228e+06	NA
P17918	P17918	Proliferating cell nuclear antigen (PCNA) (Cyclin)	Pcna	NA	NA	NA	NA	847954	1.96154e+06	1.33847e+06	NA	1623358	NA	1.65633e+06	896815
P18608	P18608	Non-histone chromosomal protein HMG-14 (High mobility group nucleosome-binding domain-containing protein 1)	Hmgn1	NA	NA	NA	NA	1.92556e+06	2.0511e+06	1.36343e+06	1.32302e+06	NA	NA	NA	NA
P18654	P18654	Ribosomal protein S6 kinase alpha-3 (S6K-alpha-3) (EC 2.7.11.1) (90 kDa ribosomal protein S6 kinase 3) (p90-RSK 3) (p90RSK3) (MAP kinase-activated protein kinase 1b) (MAPK-activated protein kinase 1b) (MAPKAP kinase 1b) (MAPKAPK-1b) (Ribosomal S6 kinase 2) (RSK-2) (pp90RSK2)	Rps6ka3	NA	NA	NA	NA	NA	NA	NA	NA	1.4973e+06	837913	4.98807e+06	1.91221e+06
P18760	P18760	Cofilin-1 (Cofilin, non-muscle isoform)	Cfl1	6.22213e+06	9.12427e+06	9.10128e+06	9956854	5.34224e+07	8.73463e+07	4.07138e+07	4.50414e+07	7.86573e+07	2.46896e+07	4.2302e+07	4.55888e+07
P19001	P19001	Keratin, type I cytoskeletal 19 (Cytokeratin-19) (CK-19) (Keratin-19) (K19)	Krt19	NA	NA	NA	NA	1.97153e+06	1912352	2.5444e+06	2314777	3.266e+06	2.03384e+06	3.8263e+06	1.73853e+06
P19091	P19091	Androgen receptor (Dihydrotestosterone receptor) (Nuclear receptor subfamily 3 group C member 4)	Ar	143811240	16434006	4400199	5.32257e+06	NA	NA	NA	NA	NA	NA	520833225	7.57684e+06
P19096	P19096	Fatty acid synthase (EC 2.3.1.85) (Type I Fatty Acid Synthase) [Includes: [Acyl-carrier-protein] S-acetyltransferase (EC 2.3.1.38); [Acyl-carrier-protein] S-malonyltransferase (EC 2.3.1.39); 3-oxoacyl-[acyl-carrier-protein] synthase (EC 2.3.1.41); 3-oxoacyl-[acyl-carrier-protein] reductase (EC 1.1.1.100); 3-hydroxyacyl-[acyl-carrier-protein] dehydratase (EC 4.2.1.59); Enoyl-[acyl-carrier-protein]…	Fasn	NA	NA	NA	NA	387407	1.2844e+06	NA	NA	NA	NA	1230001	NA
P19157	P19157	Glutathione S-transferase P 1 (Gst P1) (EC 2.5.1.18) (GST YF-YF) (GST class-pi) (GST-piB) (Preadipocyte growth factor)	Gstp1	NA	NA	NA	NA	1.00111e+06	3.12829e+06	1.30223e+06	1.79202e+06	NA	NA	NA	NA
P19182	P19182	Interferon-related developmental regulator 1 (Nerve growth factor-inducible protein PC4) (TPA-induced sequence 7) (TIS7 protein)	Ifrd1	NA	NA	NA	NA	NA	NA	NA	NA	476558	NA	1.81317e+06	260207
P19253	P19253	60S ribosomal protein L13a (Transplantation antigen P198) (Tum-P198 antigen)	Rpl13a	574347	933638	580238	NA	20853429	1.77528e+07	7.43261e+06	7.89215e+06	4.20353e+06	5.03704e+06	1.51406e+07	4.62186e+06
P19324	P19324	Serpin H1 (47 kDa heat shock protein) (Collagen-binding protein) (Colligin) (Serine protease inhibitor J6)	Serpinh1	9.32698e+06	3.53791e+07	3.03696e+07	3.71744e+07	7.5279e+07	3.35327e+08	4.39704e+07	4.89655e+07	7.67122e+07	3.16541e+07	2.06187e+08	7.28533e+07
P19426-1	P19426	Negative elongation factor E (NELF-E) (RNA-binding protein RD)	Nelfe	NA	NA	NA	NA	738040	690000	460479	528663	NA	NA	NA	NA
P20029	P20029	Endoplasmic reticulum chaperone BiP (EC 3.6.4.10) (78 kDa glucose-regulated protein) (GRP-78) (Binding-immunoglobulin protein) (BiP) (Heat shock protein 70 family protein 5) (HSP70 family protein 5) (Heat shock protein family A member 5) (Immunoglobulin heavy chain-binding protein)	Hspa5	NA	1.09034e+07	1.33854e+07	9.71817e+06	56928440	8.48144e+07	4.74276e+07	6.31164e+07	5.24155e+07	9.4364e+06	87894787	6.82209e+07
P20108	P20108	Thioredoxin-dependent peroxide reductase, mitochondrial (EC 1.11.1.24) (Antioxidant protein 1) (AOP-1) (PRX III) (Perioredoxin-3) (Protein MER5) (Thioredoxin-dependent peroxiredoxin 3)	Prdx3	NA	NA	NA	NA	NA	NA	NA	NA	521109	NA	6.77165e+06	1.12898e+06
P20152	P20152	Vimentin	Vim	2.79798e+07	1.53803e+08	1.61366e+08	2.14338e+08	1.27102e+09	1.29934e+09	1.10274e+09	1.13401e+09	1.76072e+08	1.133e+08	3.66623e+08	2.11538e+08
P21107-2	P21107	Tropomyosin alpha-3 chain (Gamma-tropomyosin) (Tropomyosin-3)	Tpm3	6.74469e+06	2.81046e+08	2.59559e+08	3.28324e+08	6.4381e+07	9.11903e+07	4.92536e+07	5.90913e+07	5.82146e+07	1.53978e+07	1.99378e+07	4.07316e+07
P21278	P21278	Guanine nucleotide-binding protein subunit alpha-11 (G alpha-11) (G-protein subunit alpha-11)	Gna11	NA	NA	NA	NA	NA	NA	NA	NA	582335	54887.5	8.08052e+06	279364
P21958	P21958	Antigen peptide transporter 1 (APT1) (EC 7.4.2.14) (ATP-binding cassette sub-family B member 2) (Histocompatibility antigen modifier 1) (Peptide transporter TAP1)	Tap1	NA	NA	NA	NA	761752	1.12127e+06	267596	352200	NA	NA	NA	NA
P23116	P23116	Eukaryotic translation initiation factor 3 subunit A (eIF3a) (Centrosomin) (Eukaryotic translation initiation factor 3 subunit 10) (eIF-3-theta) (eIF3 p167) (eIF3 p180) (eIF3 p185) (p162)	Eif3a	NA	NA	NA	NA	4.46958e+06	5.89493e+06	2.76985e+06	4.30761e+06	NA	393324	336939	NA
P23198	P23198	Chromobox protein homolog 3 (Heterochromatin protein 1 homolog gamma) (HP1 gamma) (M32) (Modifier 2 protein)	Cbx3	NA	NA	NA	NA	18984178	7.29263e+06	6116435	8153055	3442302	7.12205e+06	3.86247e+06	2.93828e+06
P23242	P23242	Gap junction alpha-1 protein (Connexin-43) (Cx43) (Gap junction 43 kDa heart protein)	Gja1	NA	NA	NA	NA	1.04222e+07	1.82251e+07	1.85575e+06	5.62514e+06	4.63658e+06	NA	3.85622e+06	2.63786e+06
P23607	P23607	Zinc finger autosomal protein	Zfa	NA	NA	NA	NA	3686871	2991853	1.77292e+06	4.18159e+06	NA	NA	NA	NA
P24270	P24270	Catalase (EC 1.11.1.6)	Cat	NA	NA	NA	NA	868497	1.35949e+06	658466	343183	806114	NA	341795	500484
P24452	P24452	Macrophage-capping protein (Actin regulatory protein CAP-G) (Actin-capping protein GCAP39) (Myc basic motif homolog 1)	Capg	NA	NA	NA	NA	4.20038e+06	5.22971e+06	2.9974e+06	3.10056e+06	1.84636e+06	831196	920509	634076
P24547	P24547	Inosine-5'-monophosphate dehydrogenase 2 (IMP dehydrogenase 2) (IMPD 2) (IMPDH 2) (EC 1.1.1.205) (IMPDH-II)	Impdh2	NA	NA	NA	NA	NA	NA	NA	NA	NA	NA	NA	NA
P25206	P25206	DNA replication licensing factor MCM3 (EC 3.6.4.12) (DNA polymerase alpha holoenzyme-associated protein P1) (P1-MCM3)	Mcm3	NA	NA	NA	NA	NA	NA	NA	NA	852029	NA	922532	340123
P25444	P25444	40S ribosomal protein S2 (40S ribosomal protein S4) (Protein LLRep3)	Rps2	8.26205e+06	32983056	2.37274e+07	2.98406e+07	8.33139e+07	5.49014e+07	5.06879e+07	62833676	7.14693e+07	5.91912e+07	1.18682e+08	7.7336e+07
P25976-1	P25976	Nucleolar transcription factor 1 (Upstream-binding factor 1) (UBF-1)	Ubtf	NA	NA	NA	NA	NA	1.53097e+06	NA	321415	NA	NA	NA	NA
P26039	P26039	Talin-1	Tln1	NA	NA	NA	NA	35482987	5.07815e+07	2.1676e+07	2.69932e+07	479492	157830	949727	76052.3
P26041	P26041	Moesin (Membrane-organizing extension spike protein)	Msn	NA	NA	NA	NA	7.2014e+06	9.90804e+06	3.01254e+06	4.01041e+06	8.30922e+06	3.25391e+06	2.56641e+07	1.02406e+07
P26043	P26043	Radixin (ESP10)	Rdx	NA	1114657	1.37408e+06	1.08828e+06	NA	NA	NA	NA	NA	NA	NA	NA
P26231	P26231	Catenin alpha-1 (102 kDa cadherin-associated protein) (Alpha E-catenin) (CAP102)	Ctnna1	NA	303545	164561	NA	1.34501e+06	2.13183e+06	1.45982e+06	1.5754e+06	3.00977e+06	2.6963e+06	1.05114e+07	6.36796e+06
P26323	P26323	Friend leukemia integration 1 transcription factor (Retroviral integration site protein Fli-1)	Fli1	NA	NA	NA	NA	NA	NA	NA	NA	NA	NA	NA	NA
P26350	P26350	Prothymosin alpha [Cleaved into: Prothymosin alpha, N-terminally processed; Thymosin alpha]	Ptma	NA	NA	NA	NA	847174	273195	646910	439530	NA	NA	NA	NA
P26361-1	P26361	Cystic fibrosis transmembrane conductance regulator (CFTR) (ATP-binding cassette sub-family C member 7) (Channel conductance-controlling ATPase) (EC 5.6.1.6) (cAMP-dependent chloride channel)	Cftr	NA	NA	NA	NA	NA	NA	NA	NA	NA	NA	NA	NA
P26369	P26369	Splicing factor U2AF 65 kDa subunit (U2 auxiliary factor 65 kDa subunit) (U2 snRNP auxiliary factor large subunit)	U2af2	NA	NA	NA	NA	9.5937e+06	1.93336e+07	3.18051e+06	1.55512e+07	8.95007e+06	NA	2.40528e+06	1.67306e+06
P26443	P26443	Glutamate dehydrogenase 1, mitochondrial (GDH 1) (EC 1.4.1.3)	Glud1	212995	399732	347677	367065	1.58656e+06	NA	909975	427176	1.27363e+06	1.1893e+06	3.41163e+06	568795
P26638	P26638	Serine--tRNA ligase, cytoplasmic (EC 6.1.1.11) (Seryl-tRNA synthetase) (SerRS) (Seryl-tRNA(Ser/Sec) synthetase)	Sars1	NA	NA	NA	NA	1.08712e+06	1.20376e+06	NA	707261	NA	NA	NA	NA
P26645	P26645	Myristoylated alanine-rich C-kinase substrate (MARCKS)	Marcks	NA	NA	NA	NA	NA	NA	NA	NA	NA	NA	1.67534e+06	NA
P26883	P26883	Peptidyl-prolyl cis-trans isomerase FKBP1A (PPIase FKBP1A) (EC 5.2.1.8) (12 kDa FK506-binding protein) (12 kDa FKBP) (FKBP-12) (Calstabin-1) (FK506-binding protein 1A) (FKBP-1A) (Immunophilin FKBP12) (Rotamase)	Fkbp1a	NA	NA	NA	NA	NA	NA	NA	NA	NA	78074.7	1103185	143884
P27048	P27048	Small nuclear ribonucleoprotein-associated protein B (snRNP-B) (snRPB) (Sm protein B) (Sm-B) (SmB)	Snrpb	NA	NA	NA	NA	2.39655e+06	1.92379e+06	1.61271e+06	1.7812e+06	NA	NA	NA	NA
P27546-1	P27546	Microtubule-associated protein 4 (MAP-4)	Map4	NA	NA	NA	289988	8.6414e+08	1.18803e+09	5.99191e+08	7.09916e+08	4.3496e+07	6.91442e+06	1.88031e+07	2.19617e+07
P27612	P27612	Phospholipase A-2-activating protein (PLA2P) (PLAP)	Plaa	NA	NA	NA	NA	1.59208e+06	1.47908e+06	713143	1.35969e+06	NA	NA	NA	NA
P27659	P27659	60S ribosomal protein L3 (J1 protein)	Rpl3	70991.6	2.86768e+07	2.10734e+07	2.39011e+07	9.99961e+07	7.8412e+07	6.90899e+07	7.57195e+07	8.14991e+07	3.1778e+07	1.21508e+08	8.06517e+07
P27661	P27661	Histone H2AX (H2a/x) (Histone H2A.X)	H2ax	NA	NA	NA	NA	7.24767e+06	9.30334e+06	4.81526e+06	5.91634e+06	NA	NA	NA	NA
P27773	P27773	Protein disulfide-isomerase A3 (EC 5.3.4.1) (58 kDa glucose-regulated protein) (58 kDa microsomal protein) (p58) (Disulfide isomerase ER-60) (Endoplasmic reticulum resident protein 57) (ER protein 57) (ERp57) (Endoplasmic reticulum resident protein 60) (ER protein 60) (ERp60)	Pdia3	1.74687e+06	8.37777e+06	6.64531e+06	8492689	3.60357e+07	3.60261e+07	3.53319e+07	3.49236e+07	2.10679e+07	5.7143e+06	3.85855e+07	22933608
P28574	P28574	Protein max (Myc-associated factor X) (Myc-binding novel HLH/LZ protein) (Protein myn)	Max	NA	NA	NA	NA	8144793	40836872	7019301	8689802	NA	NA	NA	NA
P28660	P28660	Nck-associated protein 1 (NAP 1) (Brain protein H19) (MH19) (Membrane-associated protein HEM-2) (p125Nap1)	Nckap1	NA	NA	NA	NA	NA	NA	NA	NA	4.94354e+06	618612	3.3471e+07	5.44244e+06
P28667	P28667	MARCKS-related protein (Brain protein F52) (MARCKS-like protein 1) (Macrophage myristoylated alanine-rich C kinase substrate) (Mac-MARCKS) (MacMARCKS)	Marcksl1	NA	NA	NA	NA	NA	NA	NA	NA	409738	NA	NA	895000
P28740-2	P28740	Kinesin-like protein KIF2A (Kinesin-2)	Kif2a	NA	NA	NA	NA	344508	404822	229756	315336	634343	63818.2	481543	603474
P29341	P29341	Polyadenylate-binding protein 1 (PABP-1) (Poly(A)-binding protein 1)	Pabpc1	NA	NA	NA	NA	NA	NA	NA	NA	912035	NA	2.92185e+06	1.34166e+06
P29391	P29391	Ferritin light chain 1 (Ferritin L subunit 1)	Ftl1	NA	NA	NA	NA	NA	NA	NA	NA	NA	NA	7380639	NA
P29595	P29595	NEDD8 (Neddylin) (Neural precursor cell expressed developmentally down-regulated protein 8) (NEDD-8) (Ubiquitin-like protein Nedd8)	Nedd8	NA	NA	NA	NA	NA	NA	NA	NA	NA	NA	NA	525940
P30285	P30285	Cyclin-dependent kinase 4 (EC 2.7.11.22) (CRK3) (Cell division protein kinase 4) (PSK-J3)	Cdk4	NA	NA	NA	NA	NA	NA	NA	NA	NA	NA	NA	NA
P30677	P30677	Guanine nucleotide-binding protein subunit alpha-14 (G alpha-14) (G-protein subunit alpha-14)	Gna14	NA	NA	NA	NA	861855	1.01897e+06	NA	461820	NA	NA	NA	NA
P30681	P30681	High mobility group protein B2 (High mobility group protein 2) (HMG-2)	Hmgb2	NA	NA	NA	NA	2.87839e+06	1.89756e+06	5.13514e+06	7.82076e+06	NA	NA	NA	NA
P30999-1	P30999	Catenin delta-1 (Cadherin-associated Src substrate) (CAS) (p120 catenin) (p120(ctn)) (p120(cas))	Ctnnd1	NA	NA	NA	NA	5.05498e+07	77802733	2.5754e+07	3.32504e+07	9.8518e+07	2.27245e+07	8.35197e+07	5.52754e+07
P31324	P31324	cAMP-dependent protein kinase type II-beta regulatory subunit	Prkar2b	NA	NA	NA	NA	NA	NA	NA	NA	NA	NA	NA	NA
P32067	P32067	Lupus La protein homolog (La autoantigen homolog) (La ribonucleoprotein)	Ssb	NA	NA	NA	NA	2431064	2.64108e+06	2.88643e+06	2.58791e+06	NA	NA	NA	NA
P32233	P32233	Developmentally-regulated GTP-binding protein 1 (DRG-1) (Neural precursor cell expressed developmentally down-regulated protein 3) (NEDD-3) (Translation factor GTPase DRG1) (TRAFAC GTPase DRG1) (EC 3.6.5.-)	Drg1	NA	NA	NA	NA	923950	409847	509659	506623	NA	290169	NA	370838
P32507	P32507	Nectin-2 (Herpes virus entry mediator B) (Herpesvirus entry mediator B) (HveB) (Murine herpes virus entry protein B) (mHveB) (Nectin cell adhesion molecule 2) (Poliovirus receptor homolog) (Poliovirus receptor-related protein 2) (CD antigen CD112)	Nectin2	NA	NA	NA	NA	NA	NA	NA	NA	NA	NA	NA	NA
P33215	P33215	Protein NEDD1 (Neural precursor cell expressed developmentally down-regulated protein 1) (NEDD-1)	Nedd1	NA	NA	NA	NA	NA	NA	NA	NA	NA	NA	NA	NA
P34152	P34152	Focal adhesion kinase 1 (FADK 1) (EC 2.7.10.2) (Focal adhesion kinase-related nonkinase) (FRNK) (Protein-tyrosine kinase 2) (p125FAK) (pp125FAK)	Ptk2	NA	NA	NA	NA	NA	NA	NA	NA	NA	NA	NA	NA
P35278	P35278	Ras-related protein Rab-5C (EC 3.6.5.2)	Rab5c	NA	22672288	1.14445e+06	NA	1.6869e+07	1.75064e+07	6.52971e+06	1.458e+07	1.73863e+07	1.22773e+07	2.67269e+07	15238672
P35282	P35282	Ras-related protein Rab-21 (Rab-12)	Rab21	NA	3444702	2.13803e+06	1.40015e+06	7.84646e+06	19801804	7.78392e+06	1.60661e+07	NA	NA	1.27252e+06	NA
P35293	P35293	Ras-related protein Rab-18	Rab18	NA	1.12652e+06	903326	885646	9.33288e+06	1.3501e+07	1.3727e+07	2.11103e+07	3.08443e+06	1.12853e+06	15409236	5.13125e+06
P35486	P35486	Pyruvate dehydrogenase E1 component subunit alpha, somatic form, mitochondrial (EC 1.2.4.1) (PDHE1-A type I)	Pdha1	NA	NA	NA	NA	NA	NA	NA	NA	2.25915e+06	250297	4.43882e+06	3.07251e+06
P35550	P35550	rRNA 2'-O-methyltransferase fibrillarin (EC 2.1.1.-) (Histone-glutamine methyltransferase) (Nucleolar protein 1) (U6 snRNA 2'-O-methyltransferase fibrillarin)	Fbl	605769	1.06659e+07	1.01797e+07	1.26339e+07	9.27465e+07	1.46843e+08	3.17654e+07	4.97817e+07	6.76678e+07	1.8685e+07	8.75719e+07	5.62861e+07
P35564	P35564	Calnexin	Canx	NA	NA	NA	NA	NA	NA	NA	NA	NA	NA	NA	NA
P35585	P35585	AP-1 complex subunit mu-1 (AP-mu chain family member mu1A) (Adaptor protein complex AP-1 subunit mu-1) (Adaptor-related protein complex 1 subunit mu-1) (Clathrin assembly protein complex 1 mu-1 medium chain 1) (Clathrin coat assembly protein AP47) (Clathrin coat-associated protein AP47) (Golgi adaptor HA1/AP1 adaptin mu-1 subunit) (Mu-adaptin 1) (Mu1A-adaptin)	Ap1m1	NA	NA	NA	NA	NA	NA	NA	NA	NA	NA	1.52628e+06	192289
P35700	P35700	Peroxiredoxin-1 (EC 1.11.1.24) (Macrophage 23 kDa stress protein) (Osteoblast-specific factor 3) (OSF-3) (Thioredoxin peroxidase 2) (Thioredoxin-dependent peroxide reductase 2) (Thioredoxin-dependent peroxiredoxin 1)	Prdx1	3.01269e+07	5.24306e+07	4.87238e+07	92958107	1.35579e+08	3.23718e+08	1.10598e+08	1.68288e+08	1.99924e+08	8.54109e+07	1.71963e+08	1.11937e+08
P35821	P35821	Tyrosine-protein phosphatase non-receptor type 1 (EC 3.1.3.48) (Protein-tyrosine phosphatase 1B) (PTP-1B) (Protein-tyrosine phosphatase HA2) (PTP-HA2)	Ptpn1	NA	NA	NA	NA	2.5246e+06	3318023	2.03296e+06	2308488	NA	NA	515880	NA
P35831	P35831	Tyrosine-protein phosphatase non-receptor type 12 (EC 3.1.3.48) (MPTP-PEST) (Protein-tyrosine phosphatase P19) (P19-PTP)	Ptpn12	NA	NA	NA	NA	1.67432e+07	1.81866e+07	1.06261e+07	1.26741e+07	639142	NA	2165678	409225
P35922	P35922	Fragile X messenger ribonucleoprotein 1 (Fragile X messenger ribonucleoprotein) (FMRP) (Protein FMR-1) (mFmr1p)	Fmr1	NA	NA	NA	NA	14932612	2.45686e+07	6.85132e+06	8.04329e+06	3.79588e+06	NA	3.79574e+06	1.85355e+06
P35979	P35979	60S ribosomal protein L12	Rpl12	NA	1.93163e+06	1.23315e+06	1.584e+06	1.58978e+07	1.2923e+07	1.18843e+07	1.17124e+07	7.96577e+07	9.03285e+06	3.87775e+07	6.62935e+07
P35980	P35980	60S ribosomal protein L18	Rpl18	NA	2.6939e+07	1.45645e+07	1.95074e+07	7.16308e+07	5.69205e+07	4.41194e+07	5.18016e+07	3.32983e+07	4.43159e+06	5.75607e+07	3.58814e+07
P36536	P36536	GTP-binding protein SAR1a	Sar1a	NA	NA	NA	NA	NA	NA	NA	NA	NA	NA	1.70252e+06	NA
P36993-1	P36993	Protein phosphatase 1B (EC 3.1.3.16) (Protein phosphatase 2C isoform beta) (PP2C-beta)	Ppm1b	NA	NA	NA	NA	917241	620053	159940	NA	NA	NA	NA	NA
P37040	P37040	NADPH--cytochrome P450 reductase (CPR) (P450R) (EC 1.6.2.4)	Por	NA	NA	NA	NA	NA	NA	NA	NA	NA	NA	NA	NA
P38647	P38647	Stress-70 protein, mitochondrial (75 kDa glucose-regulated protein) (GRP-75) (Heat shock 70 kDa protein 9) (Mortalin) (Peptide-binding protein 74) (PBP74) (p66 MOT)	Hspa9	1.79839e+07	1.43612e+08	1.28392e+08	1.572e+08	2.99642e+08	3.31264e+08	2.49761e+08	2.97017e+08	2.28306e+08	1.3334e+08	4.10907e+08	2.72144e+08
P39053	P39053	Dynamin-1 (EC 3.6.5.5)	Dnm1	NA	NA	NA	NA	1.48787e+06	2.51047e+06	1.00236e+06	1170290	NA	NA	NA	NA
P39054-1	P39054	Dynamin-2 (EC 3.6.5.5) (Dynamin UDNM)	Dnm2	NA	NA	NA	NA	NA	NA	NA	NA	2123232	60562352	1.19501e+06	966009
P39447	P39447	Tight junction protein ZO-1 (Tight junction protein 1) (Zona occludens protein 1) (Zonula occludens protein 1)	Tjp1	NA	NA	NA	NA	1.08332e+07	1.24368e+07	6.70102e+06	1.05631e+07	2.13823e+07	8.16529e+06	2.90214e+07	1.71791e+07
P39749	P39749	Flap endonuclease 1 (FEN-1) (EC 3.1.-.-) (Flap structure-specific endonuclease 1)	Fen1	NA	NA	NA	NA	356492	550902	NA	490719	NA	NA	NA	NA
P40124	P40124	Adenylyl cyclase-associated protein 1 (CAP 1)	Cap1	NA	NA	NA	NA	3.31228e+06	5.41058e+06	1.59092e+06	2.7262e+06	NA	NA	NA	NA
P40142	P40142	Transketolase (TK) (EC 2.2.1.1) (P68)	Tkt	NA	NA	NA	NA	NA	NA	NA	NA	NA	113969	1.78433e+06	424922
P41105	P41105	60S ribosomal protein L28	Rpl28	NA	4.38679e+06	3.2085e+06	1.48567e+06	1.50729e+07	1.30257e+07	1.51505e+07	1.75015e+07	8.59513e+06	5.01925e+06	1.03408e+07	1.29753e+07
P42125	P42125	Enoyl-CoA delta isomerase 1, mitochondrial (EC 5.3.3.8) (3,2-trans-enoyl-CoA isomerase) (Delta(3),Delta(2)-enoyl-CoA isomerase) (D3,D2-enoyl-CoA isomerase) (Dodecenoyl-CoA isomerase)	Eci1	NA	NA	NA	NA	2.18471e+06	2.31659e+06	1.59712e+06	1.95375e+06	2.72888e+06	1598044	5268663	2.10061e+06
P42128	P42128	Forkhead box protein K1 (Myocyte nuclear factor) (MNF)	Foxk1	NA	NA	NA	NA	1.25106e+07	1.33139e+07	7.72381e+06	8.54155e+06	43622896	2.48045e+07	2.90009e+07	3.39921e+07
P42208	P42208	Septin-2 (Neural precursor cell expressed developmentally down-regulated protein 5) (NEDD-5)	Septin2	NA	NA	NA	NA	1.36999e+06	1.90078e+06	924367	916601	NA	NA	NA	NA
P42225	P42225	Signal transducer and activator of transcription 1	Stat1	NA	NA	NA	NA	5.99254e+06	9.99383e+06	1.89057e+06	5.5883e+06	3.98914e+06	NA	2.81721e+06	1359677
P42227	P42227	Signal transducer and activator of transcription 3 (Acute-phase response factor)	Stat3	NA	NA	NA	NA	NA	NA	NA	NA	NA	NA	498897	NA
P42567-1	P42567	Epidermal growth factor receptor substrate 15 (Protein Eps15) (Protein AF-1p)	Eps15	NA	NA	NA	NA	761201	1.21032e+06	NA	798171	NA	NA	494441	NA
P42669	P42669	Transcriptional activator protein Pur-alpha (Purine-rich single-stranded DNA-binding protein alpha)	Pura	NA	NA	NA	NA	NA	NA	NA	NA	202810	39059.6	1.53672e+06	140453
P42932	P42932	T-complex protein 1 subunit theta (TCP-1-theta) (CCT-theta)	Cct8	NA	NA	NA	NA	1.56457e+08	241290207	1.13236e+08	1.24899e+08	5.47785e+07	1.86343e+07	4.27169e+07	3.71304e+07
P43029	P43029	Growth/differentiation factor 7 (GDF-7)	Gdf7	NA	NA	NA	NA	NA	NA	NA	NA	NA	NA	NA	NA
P43274	P43274	Histone H1.4 (H1 VAR.2) (H1e)	H1-4	436409	4.28375e+08	1.96797e+08	1.85406e+08	6.07818e+07	1.94987e+08	8.98164e+07	5.7604e+07	5.92733e+07	4.08742e+06	1.81783e+06	4.94916e+06
P43275	P43275	Histone H1.1 (H1 VAR.3) (Histone H1a) (H1a)	H1-1	NA	NA	NA	NA	937007	4.36853e+06	1.06611e+06	1.25734e+06	NA	NA	NA	NA
P43276	P43276	Histone H1.5 (H1 VAR.5) (H1b)	H1-5	NA	2.81026e+07	8.10283e+06	168474	1.85122e+07	4.12964e+07	1.95953e+07	1.58945e+07	2.97888e+07	829999	NA	2.55744e+06
P43277	P43277	Histone H1.3 (H1 VAR.4) (H1d)	H1-3	NA	2.57536e+07	8.38096e+06	2.43825e+06	1.61678e+07	4.56111e+07	21538626	16889537	9167071	1.33288e+06	3.37214e+06	2.20668e+06
P45952	P45952	Medium-chain specific acyl-CoA dehydrogenase, mitochondrial (MCAD) (EC 1.3.8.7)	Acadm	NA	NA	NA	NA	3.50078e+06	6.21949e+06	2.29478e+06	2.55446e+06	5.18683e+06	1.68795e+06	6.80338e+06	4.33519e+06
P46061	P46061	Ran GTPase-activating protein 1 (RanGAP1)	Rangap1	NA	NA	NA	NA	2.13559e+07	24189878	2.00795e+07	2.27733e+07	948090	NA	3.32509e+06	1.12225e+06
P46062	P46062	Signal-induced proliferation-associated protein 1 (Sipa-1) (GTPase-activating protein Spa-1)	Sipa1	NA	NA	NA	NA	3.78894e+07	4.33359e+07	2.103e+07	2.832e+07	4.51239e+08	1.43314e+08	2.78748e+08	2.79065e+08
P46460	P46460	Vesicle-fusing ATPase (EC 3.6.4.6) (N-ethylmaleimide-sensitive fusion protein) (NEM-sensitive fusion protein) (Suppressor of K(+) transport growth defect 2) (Protein SKD2) (Vesicular-fusion protein NSF)	Nsf	NA	NA	NA	NA	NA	NA	NA	NA	NA	NA	NA	NA
P46471	P46471	26S proteasome regulatory subunit 7 (26S proteasome AAA-ATPase subunit RPT1) (Proteasome 26S subunit ATPase 2)	Psmc2	NA	NA	NA	NA	1.99219e+07	3.19902e+07	1.39533e+07	2.16432e+07	1.78852e+06	1.05051e+06	322902	1.57803e+06
P46662-1	P46662	Merlin (Moesin-ezrin-radixin-like protein) (Neurofibromin-2) (Schwannomin)	Nf2	NA	NA	NA	NA	NA	NA	NA	NA	3.16688e+06	465289	3.203e+06	2192079
P46735-1	P46735	Unconventional myosin-Ib (MIH-L) (Myosin I alpha) (MMI-alpha) (MMIa)	Myo1b	NA	NA	NA	NA	NA	2.23013e+06	NA	NA	689017	NA	2.30432e+06	NA
P46935	P46935	E3 ubiquitin-protein ligase NEDD4 (EC 2.3.2.26) (HECT-type E3 ubiquitin transferase NEDD4) (Neural precursor cell expressed developmentally down-regulated protein 4) (NEDD-4)	Nedd4	NA	NA	NA	NA	1.52953e+06	2.19557e+06	1.0832e+06	1409766	3.26263e+06	NA	1.22369e+06	2.24744e+06
P46938-1	P46938	Transcriptional coactivator YAP1 (Yes-associated protein 1) (Protein yorkie homolog) (Yes-associated protein YAP65 homolog)	Yap1	NA	NA	NA	NA	1.50645e+06	2.25834e+06	843893	1.04499e+06	2.80821e+06	NA	1.96137e+06	211188
P46978	P46978	Dolichyl-diphosphooligosaccharide--protein glycosyltransferase subunit STT3A (Oligosaccharyl transferase subunit STT3A) (STT3-A) (EC 2.4.99.18) (B5) (Integral membrane protein 1)	Stt3a	NA	NA	NA	NA	NA	NA	NA	NA	622289	369657	4679853	776620
P47226-1	P47226	Testin (TES1/TES2)	Tes	NA	NA	NA	NA	201424	99157.4	139238	150963	2.00041e+06	NA	NA	1.14704e+06
P47713	P47713	Cytosolic phospholipase A2 (cPLA2) (Phospholipase A2 group IVA) [Includes: Phospholipase A2 (EC 3.1.1.4) (Phosphatidylcholine 2-acylhydrolase); Lysophospholipase (EC 3.1.1.5)]	Pla2g4a	NA	NA	NA	NA	3.74963e+06	5.39393e+06	1.49104e+06	1.3856e+06	NA	NA	NA	NA
P47738	P47738	Aldehyde dehydrogenase, mitochondrial (EC 1.2.1.3) (AHD-M1) (ALDH class 2) (ALDH-E2) (ALDHI)	Aldh2	NA	NA	NA	NA	4.9715e+06	4.218e+06	2.51307e+06	3.49934e+06	7.82119e+06	412422	1.08556e+07	8.56622e+06
P47754	P47754	F-actin-capping protein subunit alpha-2 (CapZ alpha-2)	Capza2	NA	NA	NA	NA	NA	NA	NA	NA	2781960	9313147	6.18124e+06	2.57276e+06
P47757-1	P47757	F-actin-capping protein subunit beta (CapZ beta)	Capzb	NA	NA	239963	3825576	1.54752e+07	2.50779e+07	1.30001e+07	1.46471e+07	NA	NA	NA	NA
P47757-4	P47757	F-actin-capping protein subunit beta (CapZ beta)	Capzb	NA	NA	NA	NA	NA	NA	NA	NA	1.58843e+07	6.3539e+06	1.7315e+07	1.69347e+07
P47758	P47758	Signal recognition particle receptor subunit beta (SR-beta)	Srprb	NA	NA	NA	NA	784980	1.09579e+06	527495	603717	843030	NA	NA	401640
P47791	P47791	Glutathione reductase, mitochondrial (GR) (GRase) (EC 1.8.1.7)	Gsr	NA	NA	NA	302396	NA	NA	NA	NA	NA	NA	NA	NA
P47911	P47911	60S ribosomal protein L6 (TAX-responsive enhancer element-binding protein 107) (TAXREB107)	Rpl6	9.02656e+06	5.78127e+07	4.06498e+07	3.93521e+07	1.47609e+08	1.34561e+08	8.96541e+07	1.09675e+08	9.82332e+07	5.47747e+07	1.01838e+08	7.99627e+07
P47915	P47915	60S ribosomal protein L29	Rpl29	NA	NA	NA	NA	8.37019e+07	6.51126e+07	5.39809e+07	5.8958e+07	1.64719e+07	281516	1.17579e+07	14569807
P47930-1	P47930	Fos-related antigen 2 (FRA-2)	Fosl2	NA	NA	NA	NA	881944	669778	231018	NA	NA	NA	2219911	NA
P47941	P47941	Crk-like protein	Crkl	NA	NA	NA	NA	NA	NA	NA	NA	2.89285e+06	318022	NA	1.49809e+06
P47962	P47962	60S ribosomal protein L5	Rpl5	NA	NA	NA	NA	530008	365736	269398	288526	1873905	96902	6.66279e+06	987341
P47963	P47963	60S ribosomal protein L13 (A52)	Rpl13	2.49024e+07	3.06032e+07	1.63979e+07	2.51895e+07	59316389	5.34884e+07	3.73454e+07	4.73057e+07	42752800	2.02385e+07	5.42583e+07	4.08293e+07
P48036	P48036	Annexin A5 (Anchorin CII) (Annexin V) (Annexin-5) (Calphobindin I) (CPB-I) (Endonexin II) (Lipocortin V) (Placental anticoagulant protein 4) (PP4) (Placental anticoagulant protein I) (PAP-I) (Thromboplastin inhibitor) (Vascular anticoagulant-alpha) (VAC-alpha)	Anxa5	NA	NA	NA	NA	317963	NA	NA	1.60693e+06	NA	NA	1.35667e+06	NA
P48614	P48614	Protein Wnt-10b (Protein Wnt-12)	Wnt10b	NA	NA	NA	NA	1145916	1.50909e+06	978885	NA	NA	NA	NA	NA
P48678-1	P48678	Prelamin-A/C [Cleaved into: Lamin-A/C]	Lmna	1.73141e+07	3.3557e+07	3.21613e+07	3.88256e+07	1.17327e+08	1.40698e+08	1.06638e+08	9.8619e+07	6.99012e+07	5.70733e+07	2.06236e+08	8.63524e+07
P48774	P48774	Glutathione S-transferase Mu 5 (EC 2.5.1.18) (Fibrous sheath component 2) (Fsc2) (GST class-mu 5)	Gstm5	NA	NA	NA	NA	NA	NA	NA	NA	163645	NA	2.63105e+06	NA
P48962	P48962	ADP/ATP translocase 1 (ADP,ATP carrier protein 1) (ADP,ATP carrier protein, heart/skeletal muscle isoform T1) (Adenine nucleotide translocator 1) (ANT 1) (Solute carrier family 25 member 4)	Slc25a4	151010	1.01582e+07	7.87816e+06	5.82936e+06	2.58062e+07	3.60441e+07	1.58273e+07	2.39322e+07	4.46665e+07	4.65096e+06	1.71144e+08	5.19329e+07
P49117	P49117	Nuclear receptor subfamily 2 group C member 2 (Orphan nuclear receptor TAK1) (Orphan nuclear receptor TR4) (Testicular receptor 4)	Nr2c2	NA	NA	NA	NA	2.23923e+06	2.19058e+06	947402	1.49529e+06	NA	NA	NA	NA
P49312-1	P49312	Heterogeneous nuclear ribonucleoprotein A1 (hnRNP A1) (HDP-1) (Helix-destabilizing protein) (Single-strand-binding protein) (Topoisomerase-inhibitor suppressed) (hnRNP core protein A1) [Cleaved into: Heterogeneous nuclear ribonucleoprotein A1, N-terminally processed]	Hnrnpa1	4319423	1063784	3403843	2788679	9.65159e+07	1.27389e+08	6.55939e+07	7.90461e+07	1.78187e+07	9.63114e+06	4.54369e+07	1.76989e+07
P49452	P49452	Centromere protein C (CENP-C) (Centromere autoantigen C) (Centromere protein C 1) (CENP-C 1)	Cenpc	NA	NA	NA	NA	170460	162312	107458	86824.4	NA	NA	NA	NA
P49698	P49698	Hepatocyte nuclear factor 4-alpha (HNF-4-alpha) (Nuclear receptor subfamily 2 group A member 1) (Transcription factor 14) (TCF-14) (Transcription factor HNF-4)	Hnf4a	NA	NA	NA	NA	NA	NA	NA	NA	NA	NA	NA	NA
P49710	P49710	Hematopoietic lineage cell-specific protein (Hematopoietic cell-specific LYN substrate 1) (LckBP1)	Hcls1	NA	NA	NA	NA	6.10538e+07	7.06123e+07	2.86705e+07	4.19249e+07	5.38728e+08	1.07934e+08	210916508	2.23369e+08
P49717	P49717	DNA replication licensing factor MCM4 (EC 3.6.4.12) (CDC21 homolog) (P1-CDC21)	Mcm4	NA	NA	NA	NA	NA	NA	NA	NA	NA	NA	NA	NA
P49817	P49817	Caveolin-1	Cav1	NA	NA	NA	NA	1.21005e+08	4.25844e+07	6.31187e+07	5.53722e+07	NA	NA	NA	NA
P49817-2	P49817	Caveolin-1	Cav1	NA	NA	NA	NA	1.92513e+06	1.97712e+06	761995	988794	NA	NA	NA	NA
P50247	P50247	Adenosylhomocysteinase (AdoHcyase) (EC 3.13.2.1) (CUBP) (Liver copper-binding protein) (S-adenosyl-L-homocysteine hydrolase)	Ahcy	NA	NA	NA	NA	NA	NA	NA	NA	8653276	NA	1.14318e+07	1.88902e+06
P50396	P50396	Rab GDP dissociation inhibitor alpha (Rab GDI alpha) (Guanosine diphosphate dissociation inhibitor 1) (GDI-1)	Gdi1	NA	NA	NA	NA	NA	NA	NA	NA	60608.1	NA	382138	NA
P50446	P50446	Keratin, type II cytoskeletal 6A (Cytokeratin-6A) (CK-6A) (Keratin-6-alpha) (mK6-alpha) (Keratin-6A) (K6A)	Krt6a	686548	3.19736e+06	3.34645e+06	1.00535e+06	93675.6	NA	1.2014e+06	128736	4.56592e+06	1.57649e+07	2.69721e+07	2.64814e+06
P50516-1	P50516	V-type proton ATPase catalytic subunit A (V-ATPase subunit A) (EC 7.1.2.2) (V-ATPase 69 kDa subunit) (Vacuolar proton pump subunit alpha)	Atp6v1a	NA	NA	NA	NA	5.97171e+06	9.33878e+06	2.71459e+06	3.80148e+06	4.00085e+06	915032	4.72337e+06	1.61575e+06
P50543	P50543	Protein S100-A11 (Calgizzarin) (Endothelial monocyte-activating polypeptide) (EMAP) (Protein S100-C) (S100 calcium-binding protein A11)	S100a11	1.9322e+06	4.17927e+07	4.78243e+07	4.30127e+07	5.77177e+07	1.09096e+07	4.87975e+07	4.95526e+07	1.49127e+07	2.06409e+07	6.63605e+06	1.15604e+07
P50544	P50544	Very long-chain specific acyl-CoA dehydrogenase, mitochondrial (EC 1.3.8.9) (MVLCAD) (VLCAD)	Acadvl	NA	NA	NA	NA	9.79876e+06	1.35522e+07	6.6579e+06	7.42781e+06	4.4509e+06	1.46216e+06	1.20119e+07	2.33707e+06
P51125-1	P51125	Calpastatin (Calpain inhibitor)	Cast	NA	NA	NA	NA	8.64818e+06	1.03216e+07	5.50558e+06	7.89151e+06	NA	NA	NA	NA
P51125-2	P51125	Calpastatin (Calpain inhibitor)	Cast	NA	NA	NA	NA	64790.1	60503.2	40497.8	65236.8	NA	NA	NA	NA
P51141	P51141	Segment polarity protein dishevelled homolog DVL-1 (Dishevelled-1) (DSH homolog 1)	Dvl1	NA	NA	NA	NA	6.44531e+06	1.28579e+07	5.76918e+06	5155385	8.52299e+06	355838	3.74741e+06	5.61548e+06
P51150	P51150	Ras-related protein Rab-7a (EC 3.6.5.2)	Rab7a	1.17087e+07	1.73571e+07	1.18472e+07	1.20219e+07	4.68948e+07	6.52672e+07	2.98853e+07	3.1525e+07	5.02861e+07	2.51545e+07	1.50913e+08	3.63213e+07
P51174	P51174	Long-chain specific acyl-CoA dehydrogenase, mitochondrial (LCAD) (EC 1.3.8.8)	Acadl	NA	NA	NA	NA	NA	NA	NA	NA	NA	NA	NA	NA
P51175	P51175	Protoporphyrinogen oxidase (PPO) (EC 1.3.3.4)	Ppox	NA	NA	NA	NA	NA	NA	NA	NA	NA	NA	NA	NA
P51410	P51410	60S ribosomal protein L9	Rpl9	NA	NA	NA	NA	1.61785e+07	14354013	8.93661e+06	1.02177e+07	1.25776e+07	2.54888e+06	2.99462e+07	1.96746e+07
P51660	P51660	Peroxisomal multifunctional enzyme type 2 (MFE-2) (17-beta-hydroxysteroid dehydrogenase 4) (17-beta-HSD 4) (D-bifunctional protein) (DBP) (Multifunctional protein 2) (MFP-2) [Cleaved into: (3R)-hydroxyacyl-CoA dehydrogenase (EC 1.1.1.n12); Enoyl-CoA hydratase 2 (EC 4.2.1.107) (EC 4.2.1.119) (3-alpha,7-alpha,12-alpha-trihydroxy-5-beta-cholest-24-enoyl-CoA hydratase)]	Hsd17b4	NA	NA	NA	NA	2.38072e+07	3.01316e+07	1.4628e+07	1.91049e+07	222039	NA	2.25449e+06	1.04719e+06
P51881	P51881	ADP/ATP translocase 2 (ADP,ATP carrier protein 2) (Adenine nucleotide translocator 2) (ANT 2) (Solute carrier family 25 member 5) [Cleaved into: ADP/ATP translocase 2, N-terminally processed]	Slc25a5	3.91854e+07	1.37427e+08	9.90242e+07	1.25168e+08	3.84115e+08	5.48793e+08	2.61306e+08	3.5561e+08	3.49489e+08	1.17914e+08	1.60676e+09	3.71973e+08
P52293	P52293	Importin subunit alpha-1 (Importin alpha P1) (Karyopherin subunit alpha-2) (Pendulin) (Pore targeting complex 58 kDa subunit) (PTAC58) (RAG cohort protein 1) (SRP1-alpha)	Kpna2	NA	NA	NA	NA	NA	NA	NA	NA	5.96373e+06	435642	4.6486e+06	2.80409e+06
P52479	P52479	Ubiquitin carboxyl-terminal hydrolase 10 (EC 3.4.19.12) (Deubiquitinating enzyme 10) (Ubiquitin thioesterase 10) (Ubiquitin-specific-processing protease 10)	Usp10	NA	NA	NA	NA	627940	898805	370623	526702	NA	NA	NA	NA
P52480	P52480	Pyruvate kinase PKM (EC 2.7.1.40) (Pyruvate kinase muscle isozyme) (Threonine-protein kinase PKM2) (EC 2.7.11.1) (Tyrosine-protein kinase PKM2) (EC 2.7.10.2)	Pkm	6.5688e+06	3.01541e+07	1.51229e+07	3.11344e+07	1.9806e+08	285743130	8.68299e+07	1.06741e+08	2.46876e+08	5.97323e+07	1.50676e+08	8.91353e+07
P52480-2	P52480	Pyruvate kinase PKM (EC 2.7.1.40) (Pyruvate kinase muscle isozyme) (Threonine-protein kinase PKM2) (EC 2.7.11.1) (Tyrosine-protein kinase PKM2) (EC 2.7.10.2)	Pkm	NA	NA	NA	NA	651563	1.24886e+06	NA	NA	NA	NA	NA	NA
P52633	P52633	Signal transducer and transcription activator 6	Stat6	NA	NA	NA	NA	861324	1.16042e+06	1.55343e+06	1.65514e+06	1.18987e+06	NA	NA	488873
P52912	P52912	Cytotoxic granule associated RNA binding protein TIA1 (Nucleolysin TIA-1) (RNA-binding protein TIA-1) (T-cell-restricted intracellular antigen-1) (TIA-1)	Tia1	NA	NA	NA	NA	570083136	782708480	368655360	587020736	NA	NA	NA	NA
P52927	P52927	High mobility group protein HMGI-C (High mobility group AT-hook protein 2)	Hmga2	1.33618e+07	9.59949e+06	1.1179e+07	1.42103e+07	3.07693e+07	6.43717e+07	2.7997e+07	38221890	4.87963e+07	1.37353e+07	3.26135e+07	3.20362e+07
P53026	P53026	60S ribosomal protein L10a (CSA-19) (Neural precursor cell expressed developmentally down-regulated protein 6) (NEDD-6)	Rpl10a	NA	NA	NA	NA	2.76078e+06	1.67093e+06	1.89629e+06	1.78933e+06	1.66837e+06	69959	6444084	2.30628e+06
P53564	P53564	Homeobox protein cut-like 1 (CCAAT displacement protein) (CDP) (Homeobox protein cux-1) [Cleaved into: CDP/Cux p110]	Cux1	NA	NA	NA	NA	4.73582e+06	5.81302e+06	3.07591e+06	3.42228e+06	NA	NA	NA	NA
P53569	P53569	CCAAT/enhancer-binding protein zeta (CCAAT-box-binding transcription factor) (CBF) (CCAAT-binding factor)	Cebpz	NA	NA	NA	NA	9.60381e+06	1.04782e+07	3.24605e+06	3.77897e+06	NA	NA	NA	NA
P53986	P53986	Monocarboxylate transporter 1 (MCT 1) (Solute carrier family 16 member 1)	Slc16a1	NA	NA	NA	NA	NA	NA	NA	NA	NA	NA	2161643	NA
P53994	P53994	Ras-related protein Rab-2A (EC 3.6.5.2)	Rab2a	NA	NA	NA	NA	NA	NA	NA	NA	NA	NA	NA	NA
P53995	P53995	Anaphase-promoting complex subunit 1 (APC1) (Cyclosome subunit 1) (Mitotic checkpoint regulator) (Testis-specific gene 24 protein)	Anapc1	NA	NA	NA	NA	894620	544816	667049	NA	NA	NA	NA	NA
P53996-1	P53996	CCHC-type zinc finger nucleic acid binding protein (Cellular nucleic acid-binding protein) (CNBP) (Zinc finger protein 9)	Cnbp	NA	NA	NA	NA	709445	1.25073e+06	761306	683769	710252	NA	72487.6	613136
P54071	P54071	Isocitrate dehydrogenase [NADP], mitochondrial (IDH) (EC 1.1.1.42) (ICD-M) (IDP) (NADP(+)-specific ICDH) (Oxalosuccinate decarboxylase)	Idh2	NA	NA	NA	NA	716017	1.04166e+06	367661	919929	312083	154237	1.11282e+06	NA
P54227	P54227	Stathmin (Leukemia-associated gene protein) (Leukemia-associated phosphoprotein p18) (Metablastin) (Oncoprotein 18) (Op18) (Phosphoprotein p19) (pp19) (Prosolin) (Protein Pr22) (pp17)	Stmn1	NA	NA	NA	NA	880346	968849	574452	489124	NA	NA	NA	NA
P54761	P54761	Ephrin type-B receptor 4 (EC 2.7.10.1) (Developmental kinase 2) (mDK-2) (Hepatoma transmembrane kinase) (Tyrosine kinase MYK-1)	Ephb4	NA	NA	NA	NA	369523	232598	225880	278799	NA	NA	NA	NA
P54775	P54775	26S proteasome regulatory subunit 6B (26S proteasome AAA-ATPase subunit RPT3) (CIP21) (MB67-interacting protein) (MIP224) (Proteasome 26S subunit ATPase 4) (Tat-binding protein 7) (TBP-7)	Psmc4	NA	NA	NA	NA	1.18123e+06	1.1035e+06	822546	1.05348e+06	914398	327617	1.13113e+06	762758
P54823	P54823	Probable ATP-dependent RNA helicase DDX6 (EC 3.6.4.13) (ATP-dependent RNA helicase p54) (DEAD box protein 6) (Oncogene RCK homolog)	Ddx6	NA	NA	NA	NA	NA	NA	NA	NA	4.29022e+06	NA	6.47808e+06	1.21768e+06
P55012	P55012	Solute carrier family 12 member 2 (Basolateral Na-K-Cl symporter) (Bumetanide-sensitive sodium-(potassium)-chloride cotransporter 2)	Slc12a2	NA	NA	NA	NA	NA	2.39706e+06	797175	984161	578561	206155	1.3213e+06	783036
P55200	P55200	Histone-lysine N-methyltransferase 2A (Lysine N-methyltransferase 2A) (EC 2.1.1.364) (ALL-1) (Cysteine methyltransferase KMT2A) (EC 2.1.1.-) (Myeloid/lymphoid or mixed-lineage leukemia) (Myeloid/lymphoid or mixed-lineage leukemia protein 1) (Zinc finger protein HRX) [Cleaved into: MLL cleavage product N320 (N-terminal cleavage product of 320 kDa) (p320); MLL cleavage product C180 (C-terminal clea…	Kmt2a	NA	NA	NA	NA	5.00788e+07	7.80438e+07	2.82402e+07	4.11915e+07	NA	NA	NA	NA
P55258	P55258	Ras-related protein Rab-8A (EC 3.6.5.2) (Oncogene c-mel)	Rab8a	NA	NA	NA	NA	1.0854e+06	1.6746e+06	865594	1.15786e+06	NA	NA	NA	NA
P56382	P56382	ATP synthase subunit epsilon, mitochondrial (ATPase subunit epsilon) (ATP synthase F1 subunit epsilon)	Atp5f1e	NA	NA	NA	NA	2.31023e+06	2.69455e+06	2.32524e+06	2.46669e+06	NA	NA	NA	NA
P56395	P56395	Cytochrome b5	Cyb5a	NA	NA	NA	NA	6.45436e+06	7883645	4.41302e+06	3.47183e+06	NA	NA	NA	NA
P56480	P56480	ATP synthase subunit beta, mitochondrial (EC 7.1.2.2) (ATP synthase F1 subunit beta)	Atp5f1b	NA	3.82796e+06	5.21676e+06	1.5234e+06	9.4486e+06	4.8361e+07	1.67013e+07	2.97804e+07	3.98733e+06	1751922	8785464	5.23294e+06
P56546-1	P56546	C-terminal-binding protein 2 (CtBP2)	Ctbp2	NA	NA	NA	NA	2.47376e+06	3.81091e+06	NA	1.94044e+06	NA	NA	NA	NA
P56959	P56959	RNA-binding protein FUS (Protein pigpen)	Fus	NA	NA	NA	NA	NA	NA	NA	NA	1357835	NA	2.22653e+07	1.25646e+06
P56960	P56960	Exosome component 10 (EC 3.1.13.-) (Autoantigen PM/Scl 2 homolog) (Polymyositis/scleroderma autoantigen 2 homolog)	Exosc10	NA	NA	NA	NA	6.43661e+06	7.46319e+06	3.22422e+06	2.35764e+06	NA	NA	NA	NA
P57776-1	P57776	Elongation factor 1-delta (EF-1-delta)	Eef1d	NA	NA	NA	NA	4.14563e+06	6.73756e+06	3.65628e+06	2.30123e+06	NA	NA	NA	NA
P57776-2	P57776	Elongation factor 1-delta (EF-1-delta)	Eef1d	NA	NA	NA	NA	NA	703214	247976	427305	NA	NA	NA	NA
P57780	P57780	Alpha-actinin-4 (Non-muscle alpha-actinin 4)	Actn4	NA	NA	NA	NA	2815508	6.25517e+06	248520	3.64297e+06	1.20108e+06	495851	2.51416e+07	443505
P58252	P58252	Elongation factor 2 (EF-2)	Eef2	2.41146e+06	1.48574e+07	1.09406e+07	1.37348e+07	9.9575e+07	1.77434e+08	6.88095e+07	7.77836e+07	1.00256e+08	3.25079e+07	1.30663e+08	6.42554e+07
P58404-1	P58404	Striatin-4 (Zinedin)	Strn4	NA	NA	NA	NA	7.27097e+06	1.04334e+07	2.54717e+06	4.86399e+06	NA	NA	NA	NA
P58468	P58468	Ribosome biogenesis protein SLX9 homolog	Slx9	NA	NA	NA	NA	NA	NA	NA	NA	1.92679e+06	108349	NA	NA
P58802	P58802	TBC1 domain family member 10A (EBP50-PDX interactor of 64 kDa) (EPI64 protein)	Tbc1d10a	NA	NA	NA	NA	NA	NA	NA	NA	45255908	3.07871e+06	NA	14365540
P58854	P58854	Gamma-tubulin complex component 3 (GCP-3)	Tubgcp3	NA	NA	NA	NA	1.50557e+06	1.17357e+06	974308	882821	NA	NA	NA	NA
P58871	P58871	182 kDa tankyrase-1-binding protein	Tnks1bp1	NA	NA	NA	NA	9.40044e+07	1.75444e+08	4.36679e+07	7.16351e+07	2.56074e+07	4.11163e+06	8.68086e+06	1.68679e+07
P59110	P59110	Sentrin-specific protease 1 (EC 3.4.22.-) (SUMO-1 protease 2) (SuPr-2) (Sentrin/SUMO-specific protease SENP1)	Senp1	NA	NA	NA	NA	1159648	1.328e+06	649132	946551	NA	NA	NA	NA
P59325	P59325	Eukaryotic translation initiation factor 5 (eIF-5)	Eif5	NA	NA	NA	NA	9.23137e+06	4.91413e+06	6.573e+06	7.26352e+06	1.5085e+06	1.43966e+06	1.70805e+06	1.73315e+06
P59326	P59326	YTH domain-containing family protein 1 (Dermatomyositis associated with cancer putative autoantigen 1 homolog) (DACA-1 homolog)	Ythdf1	NA	NA	NA	NA	355387	804777	584688	442243	NA	NA	NA	NA
P59328	P59328	WD repeat and HMG-box DNA-binding protein 1 (Acidic nucleoplasmic DNA-binding protein 1) (And-1)	Wdhd1	NA	NA	NA	NA	1.12868e+06	1.27982e+06	971868	1.28231e+06	NA	NA	NA	NA
P59708	P59708	Splicing factor 3B subunit 6 (Pre-mRNA branch site protein p14) (SF3b 14 kDa subunit)	Sf3b6	NA	NA	NA	NA	1.56244e+07	1.23902e+07	9.417e+06	11309815	NA	NA	NA	NA
P59759	P59759	Myocardin-related transcription factor B (MRTF-B) (MKL/myocardin-like protein 2)	Mrtfb	NA	NA	NA	NA	2.41566e+06	3.40265e+06	2046458	2.7797e+06	NA	NA	NA	NA
P59764	P59764	Dedicator of cytokinesis protein 4	Dock4	NA	NA	NA	NA	NA	NA	238537	341558	NA	NA	NA	NA
P59862	P59862	Cadherin-like protein 26	Cdh26	NA	NA	NA	NA	NA	NA	NA	NA	NA	127778	518922	91827.9
P59999	P59999	Actin-related protein 2/3 complex subunit 4 (Arp2/3 complex 20 kDa subunit) (p20-ARC)	Arpc4	NA	NA	NA	NA	NA	NA	NA	NA	NA	NA	NA	NA
P60122	P60122	RuvB-like 1 (EC 3.6.4.12) (49 kDa TATA box-binding protein-interacting protein) (49 kDa TBP-interacting protein) (DNA helicase p50) (Pontin 52) (TIP49a)	Ruvbl1	NA	NA	NA	NA	5.43549e+07	54198656	3.25022e+07	4.74092e+07	1.22533e+07	3.53947e+06	1.95397e+07	7.92001e+06
P60229	P60229	Eukaryotic translation initiation factor 3 subunit E (eIF3e) (Eukaryotic translation initiation factor 3 subunit 6) (MMTV integration site 6) (Mammary tumor-associated protein INT-6) (Viral integration site protein INT-6) (eIF-3 p48)	Eif3e	NA	NA	NA	NA	NA	NA	NA	NA	7.06039e+06	6.07294e+06	7.69829e+06	4.34484e+06
P60335	P60335	Poly(rC)-binding protein 1 (Alpha-CP1) (Heterogeneous nuclear ribonucleoprotein E1) (hnRNP E1)	Pcbp1	5.04741e+06	1.10658e+07	8.61975e+06	9.32074e+06	9.03176e+07	1.22033e+08	52655974	6.83343e+07	85008525	34876961	58748689	46139557
P60710	P60710	Actin, cytoplasmic 1 (Beta-actin) (EC 3.6.4.-) [Cleaved into: Actin, cytoplasmic 1, N-terminally processed]	Actb	2.06773e+09	3.54987e+09	3.1456e+09	3.53016e+09	5.65582e+09	8.3809e+09	4.24387e+09	4.94103e+09	5.4644e+09	4.28886e+09	8.31885e+09	4.48827e+09
P60764	P60764	Ras-related C3 botulinum toxin substrate 3 (EC 3.6.5.2) (p21-Rac3)	Rac3	462353	3.56935e+06	841958	2.55275e+06	NA	NA	NA	NA	NA	NA	NA	NA
P60766-2	P60766	Cell division control protein 42 homolog (EC 3.6.5.2) (G25K GTP-binding protein)	Cdc42	NA	NA	NA	NA	3.59623e+06	4.1486e+06	2.70391e+06	2.91316e+06	625627	2.23171e+06	3.05214e+06	3.98012e+06
P60843	P60843	Eukaryotic initiation factor 4A-I (eIF-4A-I) (eIF4A-I) (EC 3.6.4.13) (ATP-dependent RNA helicase eIF4A-1)	Eif4a1	NA	1.71952e+07	1.42426e+07	1.54136e+07	11175712	23198226	1.15564e+07	1.19337e+07	2.13914e+07	3.45785e+06	4.48937e+07	1.1675e+07
P60867	P60867	40S ribosomal protein S20	Rps20	723798	22096580	1.82607e+07	1.98822e+07	7.57285e+07	57703612	53808107	6.33167e+07	5.55914e+07	3.63228e+06	6.43144e+07	5.18614e+07
P61027	P61027	Ras-related protein Rab-10 (EC 3.6.5.2)	Rab10	1.1236e+06	1.70719e+06	799952	1.42441e+06	790870	579418	522744	660862	190319	14366.1	6.23606e+06	909450
P61028	P61028	Ras-related protein Rab-8B	Rab8b	NA	NA	NA	NA	1.43645e+06	1.28658e+06	683540	878884	1.11233e+07	5.26583e+06	1.88124e+07	1.13946e+07
P61082	P61082	NEDD8-conjugating enzyme Ubc12 (EC 2.3.2.34) (NEDD8 carrier protein) (Ubiquitin-conjugating enzyme E2 M)	Ube2m	NA	NA	NA	NA	NA	NA	NA	NA	3.81911e+06	1128497	1.153e+06	1.88641e+06
P61205	P61205	ADP-ribosylation factor 3	Arf3	NA	NA	NA	NA	NA	NA	NA	NA	292690	NA	18999913	NA
P61211	P61211	ADP-ribosylation factor-like protein 1	Arl1	NA	NA	NA	NA	NA	NA	NA	NA	131717	NA	4.28105e+06	180041
P61222	P61222	ATP-binding cassette sub-family E member 1 (RNase L inhibitor) (Ribonuclease 4 inhibitor) (RNS4I)	Abce1	NA	NA	NA	NA	574640	754762	426980	412785	1026905	NA	308289	265573
P61290	P61290	Proteasome activator complex subunit 3 (11S regulator complex subunit gamma) (REG-gamma) (Activator of multicatalytic protease subunit 3) (Ki nuclear autoantigen) (Proteasome activator 28 subunit gamma) (PA28g) (PA28gamma)	Psme3	NA	NA	NA	NA	1.59065e+06	1.10967e+06	1.01679e+06	1.50046e+06	NA	NA	NA	NA
P61294	P61294	Ras-related protein Rab-6B (EC 3.6.5.2)	Rab6b	NA	NA	NA	NA	1.40587e+06	1.13411e+06	1.04597e+06	1.46056e+06	NA	NA	NA	NA
P61514	P61514	60S ribosomal protein L37a	Rpl37a	77081.4	322058	285976	364185	1011716	NA	448462	496169	NA	362097	NA	341123
P61620	P61620	Protein transport protein Sec61 subunit alpha isoform 1 (Sec61 alpha-1)	Sec61a1	NA	NA	NA	NA	1.63026e+06	1.45366e+06	804580	1.06171e+06	2.26479e+06	1.83373e+06	2.02597e+07	1.37878e+06
P61957	P61957	Small ubiquitin-related modifier 2 (SUMO-2) (SMT3 homolog 2) (Ubiquitin-like protein SMT3B) (Smt3B)	Sumo2	NA	NA	NA	NA	1.7045e+06	696830	3.3667e+06	4656598	NA	NA	NA	NA
P61979	P61979	Heterogeneous nuclear ribonucleoprotein K (hnRNP K)	Hnrnpk	NA	6.2978e+06	1.99739e+06	9.55939e+06	3.29159e+07	5.01978e+07	3.51807e+07	3.32774e+07	3.14103e+07	2786949	6.56307e+07	2.6039e+07
P61982	P61982	14-3-3 protein gamma [Cleaved into: 14-3-3 protein gamma, N-terminally processed]	Ywhag	4.7341e+06	7.19136e+06	4.62425e+06	6.52973e+06	NA	NA	NA	NA	366154	258843	981438	508340
P62071	P62071	Ras-related protein R-Ras2 (EC 3.6.5.-)	Rras2	NA	4.24641e+06	2.5361e+06	3.30193e+06	1.65948e+07	3.66316e+07	6.18457e+06	1.15127e+07	2.75984e+07	1.17424e+07	3.85148e+07	1.2654e+07
P62137	P62137	Serine/threonine-protein phosphatase PP1-alpha catalytic subunit (PP-1A) (EC 3.1.3.16)	Ppp1ca	NA	NA	NA	NA	3.91966e+06	4.4624e+06	1.66689e+06	3.86076e+06	1.59128e+07	NA	1.39458e+07	9.44053e+06
P62141	P62141	Serine/threonine-protein phosphatase PP1-beta catalytic subunit (PP-1B) (EC 3.1.3.16) (EC 3.1.3.53)	Ppp1cb	NA	NA	NA	NA	NA	NA	NA	NA	2.54018e+06	408368	4.05937e+06	5.00731e+06
P62192	P62192	26S proteasome regulatory subunit 4 (P26s4) (26S proteasome AAA-ATPase subunit RPT2) (Proteasome 26S subunit ATPase 1)	Psmc1	NA	NA	NA	NA	2.11181e+06	2289624	1.39221e+06	2.06279e+06	2.43406e+07	7.80781e+06	2.00081e+07	7.7973e+06
P62196	P62196	26S proteasome regulatory subunit 8 (26S proteasome AAA-ATPase subunit RPT6) (Proteasome 26S subunit ATPase 5) (Proteasome subunit p45) (p45/SUG) (mSUG1)	Psmc5	NA	NA	NA	NA	NA	NA	NA	NA	NA	NA	923863	NA
P62242	P62242	40S ribosomal protein S8	Rps8	1.58872e+07	1.76137e+07	1.2408e+07	1.52416e+07	8.8894e+07	9.28925e+07	52115894	5.95414e+07	6.72677e+07	2.80139e+07	5.33317e+07	6.76732e+07
P62245	P62245	40S ribosomal protein S15a	Rps15a	7399541	5.96426e+06	5.49975e+06	6.08914e+06	1.8869e+07	16445345	1.14968e+07	1.33383e+07	1.57228e+07	1.18727e+07	89826813	1.86437e+07
P62259	P62259	14-3-3 protein epsilon (14-3-3E)	Ywhae	NA	NA	NA	NA	NA	NA	NA	NA	1.19281e+06	169854	9.51859e+06	568003
P62264	P62264	40S ribosomal protein S14	Rps14	2.22514e+06	2.38814e+07	1.74716e+07	7.94943e+06	5.62025e+07	39045849	3.49387e+07	4.44385e+07	4.63509e+07	8.69191e+06	29067410	49792159
P62267	P62267	40S ribosomal protein S23	Rps23	NA	NA	NA	NA	3.32967e+07	3.36134e+07	2.11158e+07	2.91126e+07	2.46358e+07	1.67493e+07	3.78205e+07	2.76928e+07
P62270	P62270	40S ribosomal protein S18 (Ke-3) (Ke3)	Rps18	37202.5	303046	260488	155652	NA	NA	NA	NA	NA	NA	NA	NA
P62274	P62274	40S ribosomal protein S29	Rps29	NA	NA	NA	NA	931174	1.34078e+06	1.76768e+06	1.32293e+06	NA	NA	NA	NA
P62281	P62281	40S ribosomal protein S11	Rps11	NA	3.14237e+07	21636863	2.91612e+07	8.86466e+07	9.47448e+07	6.41029e+07	8.21045e+07	8.42599e+07	2.7799e+07	1.06263e+08	9.78766e+07
P62309	P62309	Small nuclear ribonucleoprotein G (snRNP-G) (Sm protein G) (Sm-G) (SmG)	Snrpg	NA	NA	NA	NA	NA	NA	NA	NA	NA	NA	NA	NA
P62317	P62317	Small nuclear ribonucleoprotein Sm D2 (Sm-D2) (snRNP core protein D2)	Snrpd2	NA	NA	NA	NA	1.11361e+07	7.01688e+06	6.33454e+06	7.78139e+06	NA	NA	NA	NA
P62320	P62320	Small nuclear ribonucleoprotein Sm D3 (Sm-D3) (snRNP core protein D3)	Snrpd3	NA	NA	NA	NA	3.2155e+07	26384510	1.10914e+07	2.2194e+07	NA	NA	NA	NA
P62702	P62702	40S ribosomal protein S4, X isoform	Rps4x	56566.9	1.9906e+06	685283	1.25005e+06	6369676	2.71513e+06	5.55471e+06	3.83063e+06	1.35983e+07	2.0463e+06	14817720	10561493
P62717	P62717	60S ribosomal protein L18a	Rpl18a	865045	4.35898e+06	3.32337e+06	5.88376e+06	1.36184e+07	1.54953e+07	4.99309e+06	1.656e+07	2.63973e+07	4.03089e+06	3.24291e+07	3.10067e+07
P62743	P62743	AP-2 complex subunit sigma (Adaptor protein complex AP-2 subunit sigma) (Adaptor-related protein complex 2 subunit sigma) (Clathrin assembly protein 2 sigma small chain) (Clathrin coat assembly protein AP17) (Clathrin coat-associated protein AP17) (Plasma membrane adaptor AP-2 17 kDa protein) (Sigma-adaptin 3b) (Sigma2-adaptin)	Ap2s1	NA	NA	NA	NA	NA	NA	NA	NA	1.3618e+06	169124	5.11768e+06	1.0154e+06
P62754	P62754	40S ribosomal protein S6 (Phosphoprotein NP33)	Rps6	NA	2.61175e+06	5.85185e+06	1.19936e+07	6.02501e+07	8.04652e+07	4.1642e+07	4.78195e+07	5.02177e+07	2.66988e+07	49356188	3.35932e+07
P62806	P62806	Histone H4	H4c1	1.43237e+07	7.29334e+07	106220930	5.09202e+07	8.97215e+08	1.25625e+09	7.11826e+08	7.96725e+08	4.80084e+07	4.0621e+07	1.1371e+08	5.6394e+07
P62814	P62814	V-type proton ATPase subunit B, brain isoform (V-ATPase subunit B 2) (Endomembrane proton pump 58 kDa subunit) (Vacuolar proton pump subunit B 2)	Atp6v1b2	NA	NA	NA	NA	716500	1.42294e+06	NA	NA	1.09866e+06	NA	108178288	25541892
P62821	P62821	Ras-related protein Rab-1A (EC 3.6.5.2) (YPT1-related protein)	Rab1A	720786	4.93076e+06	574895	5.62193e+06	3.25824e+07	3.92643e+07	1.73074e+07	2.76646e+07	4.59046e+07	1.7168e+07	2.23468e+08	3.98776e+07
P62827	P62827	GTP-binding nuclear protein Ran (EC 3.6.5.-) (GTPase Ran) (Ras-like protein TC4) (Ras-related nuclear protein)	Ran	1.37576e+07	1.04377e+07	7.1641e+06	1.09878e+07	3.41111e+07	5.65034e+07	3.04779e+07	3.26662e+07	3.24407e+07	2.23826e+07	37297581	2.48816e+07
P62830	P62830	60S ribosomal protein L23	Rpl23	NA	1.04028e+07	5.12973e+06	6.89854e+06	2.04766e+07	3.96771e+07	13066508	1.58366e+07	2.48692e+07	13043903	1.38969e+07	1.20196e+07
P62835	P62835	Ras-related protein Rap-1A (EC 3.6.5.2) (Ras-related protein Krev-1)	Rap1a	NA	NA	NA	NA	584066	1.05869e+06	653303	827017	NA	NA	NA	NA
P62843	P62843	40S ribosomal protein S15 (RIG protein)	Rps15	NA	NA	NA	NA	2.261e+06	2.18294e+06	1.23931e+06	1.43491e+06	NA	NA	NA	NA
P62852	P62852	40S ribosomal protein S25	Rps25	NA	2918275	2.08712e+06	2.02885e+06	1.32528e+07	8079520	4949463	11802641	2.63344e+06	635686	7718297	4.17417e+06
P62855	P62855	40S ribosomal protein S26	Rps26	NA	NA	NA	NA	7.65917e+06	5.36415e+06	2.19209e+06	2.61592e+06	NA	NA	NA	NA
P62858	P62858	40S ribosomal protein S28	Rps28	NA	5102418	3.46122e+06	5037190	1.71019e+07	1.52231e+07	6.09799e+06	9.8897e+06	6.30555e+06	209794	17800998	1.27556e+07
P62874	P62874	Guanine nucleotide-binding protein G(I)/G(S)/G(T) subunit beta-1 (Transducin beta chain 1)	Gnb1	196947	7.46289e+06	6.58587e+06	2.15562e+06	1.49414e+07	1.52609e+07	8.34318e+06	9.04544e+06	1.37474e+07	1.88102e+07	2.77737e+07	1.69464e+07
P62880	P62880	Guanine nucleotide-binding protein G(I)/G(S)/G(T) subunit beta-2 (G protein subunit beta-2) (Transducin beta chain 2)	Gnb2	NA	2.65248e+06	2.07585e+06	2.20912e+06	8.65754e+06	1.00207e+07	7.41836e+06	7.6787e+06	8.84352e+06	3.12644e+06	7.63637e+06	11077418
P62889	P62889	60S ribosomal protein L30	Rpl30	NA	NA	NA	NA	3.54356e+06	3838352	2893484	NA	622731	NA	NA	504836
P62897	P62897	Cytochrome c, somatic	Cycs	NA	NA	NA	NA	NA	NA	NA	NA	172797	NA	2828133	NA
P62900	P62900	60S ribosomal protein L31	Rpl31	374390	697444	704742	434604	NA	NA	1.21915e+06	1377993	319456	370988	1.15317e+06	664771
P62908	P62908	40S ribosomal protein S3 (EC 4.2.99.18)	Rps3	NA	8.70087e+06	7.30451e+06	1.08547e+07	4.85329e+07	40950672	2.44263e+07	3.47983e+07	4.28171e+07	2.95901e+07	2.27749e+08	7.39391e+07
P62911	P62911	60S ribosomal protein L32	Rpl32	NA	NA	NA	NA	1.27057e+06	1.37943e+06	1.223e+06	1060524	NA	NA	NA	NA
P62918	P62918	60S ribosomal protein L8	Rpl8	951232	1.89525e+07	1.13572e+07	7.61051e+06	8.46887e+07	1.06755e+08	4.41102e+07	7.06525e+07	39118579	1.11935e+07	5.30484e+07	4.96295e+07
P62983	P62983	Ubiquitin-40S ribosomal protein S27a (Ubiquitin carboxyl extension protein 80) [Cleaved into: Ubiquitin; 40S ribosomal protein S27a]	Rps27a	NA	NA	NA	NA	3.82189e+07	3.6278e+07	2.74973e+07	2.98335e+07	2.66262e+07	2.77373e+06	1.20449e+08	1.95075e+07
P62984	P62984	Ubiquitin-60S ribosomal protein L40 (Ubiquitin A-52 residue ribosomal protein fusion product 1) [Cleaved into: Ubiquitin; 60S ribosomal protein L40 (CEP52)]	Uba52	NA	5167069	5.18483e+06	7449093	NA	NA	NA	NA	NA	NA	NA	NA
P63001	P63001	Ras-related C3 botulinum toxin substrate 1 (EC 3.6.5.2) (p21-Rac1)	Rac1	NA	NA	NA	NA	8.44156e+06	1.26116e+07	6.70451e+06	8.59186e+06	6.60669e+06	1.66678e+06	10296661	8.99716e+06
P63017	P63017	Heat shock cognate 71 kDa protein (EC 3.6.4.10) (Heat shock 70 kDa protein 8)	Hspa8	1.06174e+07	1.8879e+07	1.5776e+07	1.14634e+07	1.62619e+08	1.76741e+08	1.27972e+08	1.4864e+08	1.80677e+08	4.57833e+07	4.57572e+08	1.75919e+08
P63028	P63028	Translationally-controlled tumor protein (TCTP) (21 kDa polypeptide) (p21) (p23)	Tpt1	NA	NA	NA	NA	983546	74035	NA	47777.4	NA	NA	NA	NA
P63037	P63037	DnaJ homolog subfamily A member 1 (DnaJ protein homolog 2) (Heat shock 40 kDa protein 4) (Heat shock protein J2) (HSJ-2)	Dnaja1	NA	NA	NA	NA	1634434	1.80272e+06	1.96516e+06	1.98578e+06	6.26862e+06	2.03782e+06	1.68059e+07	3914185
P63038-1	P63038	60 kDa heat shock protein, mitochondrial (EC 5.6.1.7) (60 kDa chaperonin) (Chaperonin 60) (CPN60) (HSP-65) (Heat shock protein 60) (HSP-60) (Hsp60) (Mitochondrial matrix protein P1)	Hspd1	3.86013e+07	4.18934e+07	4.10762e+07	4.76461e+07	1.56346e+08	1.98331e+08	1.06869e+08	1.59047e+08	1.09297e+08	6.58288e+07	1.30136e+08	1.02468e+08
P63073	P63073	Eukaryotic translation initiation factor 4E (eIF-4E) (eIF4E) (mRNA cap-binding protein) (eIF-4F 25 kDa subunit)	Eif4e	NA	NA	NA	NA	NA	NA	NA	NA	NA	NA	NA	NA
P63085	P63085	Mitogen-activated protein kinase 1 (MAP kinase 1) (MAPK 1) (EC 2.7.11.24) (ERT1) (Extracellular signal-regulated kinase 2) (ERK-2) (MAP kinase isoform p42) (p42-MAPK) (Mitogen-activated protein kinase 2) (MAP kinase 2) (MAPK 2)	Mapk1	NA	NA	NA	NA	1.35215e+06	1.79354e+06	815653	497541	9.10927e+06	1.00219e+06	1.17726e+07	5.2595e+06
P63087	P63087	Serine/threonine-protein phosphatase PP1-gamma catalytic subunit (PP-1G) (EC 3.1.3.16) (Protein phosphatase 1C catalytic subunit)	Ppp1cc	NA	NA	NA	NA	3.81368e+07	3.50486e+07	9.80079e+06	4.35499e+07	207030513	4.39611e+07	1.68957e+08	1.34288e+08
P63094	P63094	Guanine nucleotide-binding protein G(s) subunit alpha isoforms short (Adenylate cyclase-stimulating G alpha protein)	Gnas	NA	NA	NA	NA	8.36256e+06	6.56192e+06	1.84981e+06	2.95883e+06	5.39304e+06	2.65438e+06	6.31842e+06	5.5941e+06
P63101	P63101	14-3-3 protein zeta/delta (Protein kinase C inhibitor protein 1) (KCIP-1) (SEZ-2)	Ywhaz	NA	NA	NA	NA	6.70467e+06	1.17804e+06	292119	467542	1.11458e+07	3.73741e+06	3.75599e+07	1.29669e+07
P63154	P63154	Crooked neck-like protein 1 (Crooked neck homolog)	Crnkl1	NA	NA	NA	NA	NA	NA	NA	NA	8.16245e+06	2.4282e+06	8.43648e+06	7.03597e+06
P63158	P63158	High mobility group protein B1 (High mobility group protein 1) (HMG-1)	Hmgb1	NA	NA	NA	NA	1.57961e+07	5.67434e+06	1.1045e+07	19158022	1.7644e+06	NA	4.82787e+06	2.44985e+06
P63166	P63166	Small ubiquitin-related modifier 1 (SUMO-1) (SMT3 homolog 3) (Ubiquitin-homology domain protein PIC1) (Ubiquitin-like protein SMT3C) (Smt3C)	Sumo1	NA	NA	NA	NA	3.13155e+06	2485436	4381812	5.1761e+06	1.25351e+06	327907	5.11755e+06	3.7583e+06
P63168	P63168	Dynein light chain 1, cytoplasmic (8 kDa dynein light chain) (DLC8) (Dynein light chain LC8-type 1) (Protein inhibitor of neuronal nitric oxide synthase) (PIN) (mPIN)	Dynll1	NA	NA	NA	NA	NA	NA	NA	NA	NA	NA	8.59788e+06	1.69656e+06
P63242	P63242	Eukaryotic translation initiation factor 5A-1 (eIF-5A-1) (eIF-5A1) (Eukaryotic initiation factor 5A isoform 1) (eIF-5A) (eIF-4D)	Eif5a	NA	NA	NA	NA	NA	NA	NA	NA	1.19616e+07	2.2731e+06	12350229	7.45677e+06
P63276	P63276	40S ribosomal protein S17	Rps17	NA	NA	NA	NA	1.8711e+06	1.31329e+06	1.14115e+06	4.75574e+06	2733666	NA	5.06905e+06	4244589
P63323	P63323	40S ribosomal protein S12	Rps12	NA	3.8015e+06	3.30364e+06	2.98114e+06	907427	1077087	905881	989144	1.26569e+07	4.75826e+06	1.60981e+07	1.02988e+07
P67778	P67778	Prohibitin 1 (B-cell receptor-associated protein 32) (BAP 32)	Phb1	4.57878e+06	1.16352e+08	1.73989e+07	1.97579e+07	1.06991e+08	7.84697e+07	3.91336e+07	5.31038e+07	6.72911e+07	3.25892e+07	8.99759e+07	5.63818e+07
P67871	P67871	Casein kinase II subunit beta (CK II beta) (Phosvitin)	Csnk2b	NA	NA	NA	NA	NA	NA	NA	NA	271888	2.93045e+06	5.05959e+06	390246
P67984	P67984	60S ribosomal protein L22 (Heparin-binding protein HBp15)	Rpl22	2.58143e+06	2948149	2.11071e+06	2.99705e+06	6.43958e+06	6.10563e+06	6.86309e+06	6094778	7.57527e+06	4.39133e+06	27939619	1.01512e+07
P68040	P68040	Receptor of activated protein C kinase 1 (12-3) (Guanine nucleotide-binding protein subunit beta-2-like 1) (Receptor for activated C kinase) (Receptor of activated protein kinase C 1) (p205) [Cleaved into: Receptor of activated protein C kinase 1, N-terminally processed (Guanine nucleotide-binding protein subunit beta-2-like 1, N-terminally processed)]	Rack1	NA	1.21862e+07	8.49217e+06	9.78077e+06	4.40751e+07	3.2132e+07	2.95867e+07	4.40001e+07	6.20937e+07	2.66366e+07	2.22982e+08	7.90926e+07
P68134	P68134	Actin, alpha skeletal muscle (EC 3.6.4.-) (Alpha-actin-1) [Cleaved into: Actin, alpha skeletal muscle, intermediate form]	Acta1	38837082	79207871	1.47392e+08	77364153	1.20999e+08	478596462	267355354	3.17419e+08	6.81959e+07	2.17256e+08	8.45015e+08	5.05302e+07
P68254-1	P68254	14-3-3 protein theta (14-3-3 protein tau)	Ywhaq	NA	NA	NA	NA	2.96241e+06	3.7747e+06	978917	925695	2.98556e+06	182250	4.75147e+06	3.31299e+06
P68369	P68369	Tubulin alpha-1A chain (EC 3.6.5.-) (Alpha-tubulin 1) (Alpha-tubulin isotype M-alpha-1) (Tubulin alpha-1 chain) [Cleaved into: Detyrosinated tubulin alpha-1A chain]	Tuba1a	3.40793e+07	3.47531e+07	39936768	2.91185e+07	1.27921e+08	3.23098e+08	8.99659e+07	8.37288e+07	NA	NA	NA	NA
P68372	P68372	Tubulin beta-4B chain (Tubulin beta-2C chain)	Tubb4b	253414	4.08357e+06	3.66238e+06	3.11942e+06	1.2691e+07	4.22418e+07	1.15036e+07	1.1173e+07	57982114	1.12761e+07	1.63735e+07	1.78226e+07
P68373	P68373	Tubulin alpha-1C chain (EC 3.6.5.-) (Alpha-tubulin 6) (Alpha-tubulin isotype M-alpha-6) (Tubulin alpha-6 chain) [Cleaved into: Detyrosinated tubulin alpha-1C chain]	Tuba1c	NA	NA	NA	NA	NA	NA	NA	NA	NA	NA	NA	NA
P68510	P68510	14-3-3 protein eta	Ywhah	NA	NA	NA	NA	9.3189e+06	1.05885e+07	9.39478e+06	6.45733e+06	2.73655e+06	NA	3.1526e+06	5.09325e+06
P69566	P69566	Ran-binding protein 9 (RanBP9) (B-cell antigen receptor Ig beta-associated protein 1) (IBAP-1) (Ran-binding protein M) (RanBPM)	Ranbp9	NA	NA	NA	NA	6.83553e+07	6.52559e+07	4.10436e+07	6.16427e+07	1.65291e+06	514255	NA	711246
P70168	P70168	Importin subunit beta-1 (Karyopherin subunit beta-1) (Nuclear factor p97) (Pore targeting complex 97 kDa subunit) (PTAC97) (SCG)	Kpnb1	NA	NA	NA	NA	1.21986e+07	1.32936e+07	9.67158e+06	1.11773e+07	4.59842e+06	772495	6.71807e+06	4.61725e+06
P70224	P70224	GTPase IMAP family member 1 (Immune-associated protein 38) (IAP38) (Immunity-associated protein 1)	Gimap1	NA	NA	NA	NA	NA	NA	NA	NA	1.37886e+06	419740	5540931	1.79257e+06
P70255-1	P70255	Nuclear factor 1 C-type (NF1-C) (Nuclear factor 1/C) (CCAAT-box-binding transcription factor) (CTF) (Nuclear factor I/C) (NF-I/C) (NFI-C) (TGGCA-binding protein)	Nfic	NA	NA	NA	NA	1.15576e+06	1172576	997061	1.31599e+06	1593888	378597	509462	1.31104e+06
P70279	P70279	Surfeit locus protein 6	Surf6	NA	NA	NA	NA	4.90912e+06	5.55155e+06	2.31421e+06	2.05708e+06	NA	NA	NA	NA
P70290	P70290	55 kDa erythrocyte membrane protein (p55) (Membrane protein, palmitoylated 1)	Mpp1	NA	NA	NA	NA	8.30828e+06	1.53623e+07	4.11913e+06	4.81511e+06	4270772	387949	4.6783e+06	2.01076e+06
P70295	P70295	Lipid droplet-regulating VLDL assembly factor AUP1 (Ancient ubiquitous protein 1)	Aup1	NA	NA	NA	NA	4.64426e+06	7777777	NA	NA	NA	NA	NA	NA
P70313	P70313	Nitric oxide synthase, endothelial (EC 1.14.13.39) (Constitutive NOS) (cNOS) (EC-NOS) (Endothelial NOS) (eNOS) (NOS type III) (NOSIII)	Nos3	1.67754e+06	1.01153e+07	4.02811e+06	5.50836e+06	1.42995e+08	1.66436e+08	7.26184e+08	1.00238e+08	8.23238e+07	2.16876e+07	1.03985e+08	7.42219e+07
P70333	P70333	Heterogeneous nuclear ribonucleoprotein H2 (hnRNP H2) (Heterogeneous nuclear ribonucleoprotein H') (hnRNP H') [Cleaved into: Heterogeneous nuclear ribonucleoprotein H2, N-terminally processed]	Hnrnph2	NA	NA	NA	NA	NA	NA	NA	NA	2.34382e+06	2.29366e+06	9.30855e+06	3.07377e+06
P70336-1	P70336	Rho-associated protein kinase 2 (EC 2.7.11.1) (Rho-associated, coiled-coil-containing protein kinase 2) (Rho-associated, coiled-coil-containing protein kinase II) (ROCK-II) (p164 ROCK-2)	Rock2	NA	NA	NA	NA	594049	1.68898e+06	917378	1.07636e+06	NA	NA	NA	NA
P70349	P70349	Adenosine 5'-monophosphoramidase HINT1 (EC 3.9.1.-) (Desumoylating isopeptidase HINT1) (EC 3.4.22.-) (Histidine triad nucleotide-binding protein 1) (Protein kinase C inhibitor 1) (Protein kinase C-interacting protein 1) (PKCI-1)	Hint1	NA	NA	NA	NA	1.28949e+06	2.45802e+06	1.042e+06	4.67571e+06	3.69277e+06	5764274	1.24594e+07	1.19306e+07
P70372	P70372	ELAV-like protein 1 (Elav-like generic protein) (Hu-antigen R) (HuR) (MelG)	Elavl1	1.2072e+06	3.85745e+06	2.96488e+06	2.07616e+06	1.90981e+07	1.65834e+07	1.27983e+07	1.33794e+07	2.36228e+07	1.14099e+07	5.24652e+07	1.93872e+07
P70399	P70399	TP53-binding protein 1 (53BP1) (p53-binding protein 1) (p53BP1)	Tp53bp1	32370	237006	21138312	388986	4.44294e+07	5.27519e+07	3.87509e+07	4.29079e+07	428693	NA	665496	627276
P70404	P70404	Isocitrate dehydrogenase [NAD] subunit gamma 1, mitochondrial (Isocitric dehydrogenase subunit gamma) (NAD(+)-specific ICDH subunit gamma)	Idh3g	NA	NA	NA	NA	NA	NA	NA	NA	499884	NA	3.28363e+06	322299
P70407	P70407	Cadherin-9 (T1-cadherin)	Cdh9	NA	NA	NA	NA	NA	NA	NA	NA	6.88619e+06	959824	624596	3.09205e+06
P70460	P70460	Vasodilator-stimulated phosphoprotein (VASP)	Vasp	NA	NA	NA	NA	2.22236e+06	1.35559e+06	622066	759396	1.01774e+06	354358	851472	474670
P70670	P70670	Nascent polypeptide-associated complex subunit alpha, muscle-specific form (Alpha-NAC, muscle-specific form) (skNAC)	Naca	NA	NA	NA	NA	752850	725702	NA	NA	2.37794e+06	NA	4.23135e+06	NA
P70677	P70677	Caspase-3 (CASP-3) (EC 3.4.22.56) (Apopain) (Cysteine protease CPP32) (CPP-32) (LICE) (Protein Yama) (SREBP cleavage activity 1) (SCA-1) [Cleaved into: Caspase-3 subunit p17; Caspase-3 subunit p12]	Casp3	NA	NA	NA	NA	1.81176e+06	2.18966e+06	1114589	1.30533e+06	NA	NA	NA	NA
P70698	P70698	CTP synthase 1 (EC 6.3.4.2) (CTP synthetase 1) (UTP--ammonia ligase 1)	Ctps1	NA	NA	NA	NA	3.26987e+06	5.59725e+06	3.4908e+06	3714739	NA	NA	NA	NA
P70700	P70700	DNA-directed RNA polymerase I subunit RPA2 (RNA polymerase I subunit 2) (EC 2.7.7.6) (DNA-directed RNA polymerase I 135 kDa polypeptide) (RPA135)	Polr1b	NA	NA	NA	NA	1.6452e+06	1.3928e+06	578589	2.3502e+06	NA	NA	NA	NA
P80313	P80313	T-complex protein 1 subunit eta (TCP-1-eta) (CCT-eta)	Cct7	NA	NA	NA	NA	2.37301e+06	4.72713e+06	1.74423e+06	2.28969e+06	3.75405e+06	345484	2.5672e+06	1.55699e+06
P80314	P80314	T-complex protein 1 subunit beta (TCP-1-beta) (CCT-beta)	Cct2	301277	267505	172187	300819	6.91748e+06	8.55248e+06	3.80181e+06	6.82197e+06	1.16955e+06	NA	786523	768711
P80315	P80315	T-complex protein 1 subunit delta (TCP-1-delta) (A45) (CCT-delta)	Cct4	173827	NA	NA	430205	7931803	1.95808e+07	5.21801e+06	5.50964e+06	1.74073e+07	1.26895e+06	1.0734e+06	4.09558e+06
P80316	P80316	T-complex protein 1 subunit epsilon (TCP-1-epsilon) (CCT-epsilon)	Cct5	NA	NA	NA	NA	1.09332e+08	1.72744e+08	6.38091e+07	9.00296e+07	6.09448e+07	1.59793e+07	4.46371e+07	3.12311e+07
P80317	P80317	T-complex protein 1 subunit zeta (TCP-1-zeta) (CCT-zeta-1)	Cct6a	NA	NA	NA	NA	3.85725e+07	7.70733e+07	2.70749e+07	3.67372e+07	2.89703e+07	5.78202e+06	2.81739e+07	1.26405e+07
P80318	P80318	T-complex protein 1 subunit gamma (TCP-1-gamma) (CCT-gamma) (Matricin) (mTRiC-P5)	Cct3	NA	2460080	1.69566e+06	2.45393e+06	2.51163e+07	59148425	1.15948e+07	1.83457e+07	4.8833e+07	1.72975e+06	1.5539e+07	1.11996e+07
P81270-1	P81270	Transcriptional regulator ERG	Erg	NA	NA	NA	NA	NA	NA	NA	NA	4.93416e+06	NA	3.03142e+06	1.94705e+06
P83093	P83093	Stromal interaction molecule 2	Stim2	NA	NA	NA	NA	1.62216e+06	2.05943e+06	889136	1.16507e+06	NA	NA	NA	NA
P83626	P83626	Tumor necrosis factor receptor superfamily member 26 (TNF receptor homolog 3)	Tnfrsf26	NA	NA	NA	NA	NA	NA	NA	NA	NA	NA	NA	NA
P83741	P83741	Serine/threonine-protein kinase WNK1 (EC 2.7.11.1) (Protein kinase lysine-deficient 1) (Protein kinase with no lysine 1)	Wnk1	NA	NA	NA	NA	4.80528e+06	6.66955e+06	3.45971e+06	4.26525e+06	NA	NA	NA	NA
P83870	P83870	PHD finger-like domain-containing protein 5A (PHD finger-like domain protein 5A) (Splicing factor 3B-associated 14 kDa protein) (SF3b14b)	Phf5a	NA	NA	NA	NA	1.92206e+06	2.04427e+06	1.73553e+06	1.562e+06	1.38512e+06	264799	1716723	1.6492e+06
P83882	P83882	60S ribosomal protein L36a (60S ribosomal protein L44)	Rpl36a	87405	425711	NA	NA	9202696	9.94995e+06	6.01549e+06	6.3194e+06	1.10545e+07	1.29263e+07	NA	8.13265e+06
P84089	P84089	Enhancer of rudimentary homolog (Mer)	Erh	NA	NA	NA	NA	6.70568e+06	10919088	6.05302e+06	7.088e+06	2.43807e+06	NA	5.1318e+06	1.29156e+06
P84091	P84091	AP-2 complex subunit mu (AP-2 mu chain) (Adaptor protein complex AP-2 subunit mu) (Adaptor-related protein complex 2 subunit mu) (Clathrin assembly protein complex 2 mu medium chain) (Clathrin coat assembly protein AP50) (Clathrin coat-associated protein AP50) (Mu2-adaptin) (Plasma membrane adaptor AP-2 50 kDa protein)	Ap2m1	NA	NA	NA	NA	NA	NA	NA	NA	NA	NA	1.41589e+06	NA
P84096	P84096	Rho-related GTP-binding protein RhoG (Sid 10750)	Rhog	NA	196280	NA	246195	10509241	22137833	6156110	7776764	7867141	2.84282e+06	5845056	7.1824e+06
P84099	P84099	60S ribosomal protein L19	Rpl19	NA	NA	NA	NA	5.92823e+06	4.70103e+06	3.62636e+06	3.73844e+06	2.65885e+06	835639	NA	1.85952e+06
P84104-1	P84104	Serine/arginine-rich splicing factor 3 (Pre-mRNA-splicing factor SRP20) (Protein X16) (Splicing factor, arginine/serine-rich 3)	Srsf3	NA	NA	NA	NA	NA	7.52242e+06	3330492	NA	21924739	3.4889e+06	2.13941e+06	2.53164e+06
P84228	P84228	Histone H3.2 (H3-clustered histone 13) (H3-clustered histone 14) (H3-clustered histone 15) (H3-clustered histone 2) (H3-clustered histone 3) (H3-clustered histone 4) (H3-clustered histone 6) (H3-clustered histone 7)	H3c2	1.46361e+08	5.85094e+08	4.50226e+08	6.96873e+08	2.24427e+09	2.34413e+09	1.5746e+09	1.99906e+09	1.39459e+09	9.53907e+08	1.83312e+09	1.33449e+09
P84244	P84244	Histone H3.3	H3-3a	NA	NA	NA	NA	NA	270334	NA	462116	NA	NA	NA	NA
P97310	P97310	DNA replication licensing factor MCM2 (EC 3.6.4.12) (Minichromosome maintenance protein 2 homolog) (Nuclear protein BM28)	Mcm2	NA	NA	NA	NA	NA	NA	NA	NA	1173842	226476	778841	510295
P97311	P97311	DNA replication licensing factor MCM6 (EC 3.6.4.12) (Mis5 homolog)	Mcm6	NA	NA	NA	NA	1.25855e+06	869757	1.17529e+06	1.36603e+06	NA	NA	NA	NA
P97315	P97315	Cysteine and glycine-rich protein 1 (Cysteine-rich protein 1) (CRP) (CRP1)	Csrp1	NA	NA	NA	NA	1.43282e+06	1.85726e+06	812237	1.05287e+06	1.03508e+06	NA	570972	528827
P97351	P97351	40S ribosomal protein S3a (Protein TU-11)	Rps3a	NA	NA	NA	NA	2.20838e+07	1.5937e+07	8.0652e+06	1.1455e+07	1.6775e+07	7.37258e+06	1.19125e+07	1.33612e+07
P97376	P97376	Protein FRG1 (FSHD region gene 1 protein)	Frg1	NA	NA	NA	NA	810890	527468	472231	507366	NA	NA	NA	NA
P97379-1	P97379	Ras GTPase-activating protein-binding protein 2 (G3BP-2) (GAP SH3 domain-binding protein 2)	G3bp2	NA	NA	NA	NA	1.95082e+07	2.10861e+07	1.26354e+07	1.56018e+07	5.47847e+06	1.08267e+06	1.97215e+07	5.41131e+06
P97384	P97384	Annexin A11 (Annexin XI) (Annexin-11) (Calcyclin-associated annexin 50) (CAP-50)	Anxa11	NA	NA	NA	NA	NA	NA	NA	NA	NA	120627	1167831	332928
P97429	P97429	Annexin A4 (Annexin IV) (Annexin-4)	Anxa4	NA	NA	NA	NA	1.6479e+06	NA	1.81354e+06	2.08952e+06	NA	52401.8	469616	1.51852e+06
P97432	P97432	Next to BRCA1 gene 1 protein (Membrane component chromosome 17 surface marker 2 homolog) (Neighbor of BRCA1 gene 1 protein)	Nbr1	NA	NA	NA	NA	7.91666e+06	1.52491e+07	929628	4.67118e+06	NA	NA	NA	NA
P97434-1	P97434	Myosin phosphatase Rho-interacting protein (Rho-interacting protein 3) (RIP3) (p116Rip)	Mprip	NA	NA	NA	NA	1.96457e+06	3.53829e+06	1.41528e+06	856212	NA	NA	NA	257400
P97452	P97452	Ribosome biogenesis protein BOP1 (Block of proliferation 1 protein)	Bop1	NA	NA	NA	NA	12088943	7.8394e+06	3.96761e+06	2.85574e+06	3.23057e+06	NA	4402655	1.17484e+06
P97461	P97461	40S ribosomal protein S5 [Cleaved into: 40S ribosomal protein S5, N-terminally processed]	Rps5	NA	NA	NA	NA	2.78975e+07	2.07238e+07	1.82811e+07	2.10152e+07	1.50435e+06	541502	7.06029e+06	5.11804e+06
P97465	P97465	Docking protein 1 (Downstream of tyrosine kinase 1) (p62(dok))	Dok1	NA	NA	NA	NA	NA	NA	NA	NA	3.41735e+06	NA	1.54108e+06	160643
P97496	P97496	SWI/SNF complex subunit SMARCC1 (BRG1-associated factor 155) (SWI/SNF complex 155 kDa subunit) (SWI/SNF-related matrix-associated actin-dependent regulator of chromatin subfamily C member 1) (SWI3-related protein) (BAF155)	Smarcc1	NA	NA	NA	NA	2.7463e+06	4.06356e+06	1.64406e+06	2.37437e+06	NA	NA	NA	NA
P97742	P97742	Carnitine O-palmitoyltransferase 1, liver isoform (CPT1-L) (EC 2.3.1.21) (Carnitine O-palmitoyltransferase I, liver isoform) (CPT I) (CPTI-L) (Carnitine palmitoyltransferase 1A)	Cpt1a	NA	NA	NA	NA	2.12956e+06	3.8535e+06	2.02062e+06	2551297	2.5534e+06	1.01814e+06	NA	1.74127e+06
P97789-1	P97789	5'-3' exoribonuclease 1 (mXRN1) (EC 3.1.13.-) (Protein Dhm2) (Strand-exchange protein 1 homolog)	Xrn1	NA	NA	NA	NA	9.84417e+06	1.12221e+07	7.47046e+06	6.94746e+06	7.86991e+06	887654	1.38568e+07	6.49244e+06
P97807-1	P97807	Fumarate hydratase, mitochondrial (Fumarase) (EC 4.2.1.2) (EF-3)	Fh	89920.1	466131	241892	NA	2.84165e+06	3.15057e+06	1.42012e+06	2.09007e+06	5.13998e+06	571342	5.50166e+06	737747
P97817	P97817	Cerebellar degeneration-related protein 2	Cdr2	NA	NA	NA	NA	984975	2.06221e+06	NA	225021	NA	NA	NA	NA
P97820	P97820	Mitogen-activated protein kinase kinase kinase kinase 4 (EC 2.7.11.1) (HPK/GCK-like kinase HGK) (MAPK/ERK kinase kinase kinase 4) (MEK kinase kinase 4) (MEKKK 4) (Nck-interacting kinase)	Map4k4	NA	NA	NA	NA	6.07593e+06	6.1352e+06	1.28551e+06	3.26515e+06	3.44782e+06	NA	5.67862e+06	3.98748e+06
P97825	P97825	Jupiter microtubule associated homolog 1 (Hematological and neurological expressed 1 protein) [Cleaved into: Jupiter microtubule associated homolog 1, N-terminally processed]	Jpt1	NA	NA	NA	NA	6.45755e+06	8485943	445656	1.21545e+06	3.15525e+06	NA	NA	633721
P97855	P97855	Ras GTPase-activating protein-binding protein 1 (G3BP-1) (EC 3.6.4.12) (EC 3.6.4.13) (ATP-dependent DNA helicase VIII) (GAP SH3 domain-binding protein 1) (HDH-VIII)	G3bp1	NA	NA	NA	NA	1.9344e+08	2.20332e+08	1.16443e+08	1.56816e+08	5.59637e+07	1.83462e+07	59375541	4.56232e+07
P97857	P97857	A disintegrin and metalloproteinase with thrombospondin motifs 1 (ADAM-TS 1) (ADAM-TS1) (ADAMTS-1) (EC 3.4.24.-)	Adamts1	NA	NA	NA	NA	1.42432e+06	1.66676e+06	300627	1.13742e+06	1.36232e+06	NA	1.06515e+06	2.74351e+06
P97863	P97863	Nuclear factor 1 B-type (NF1-B) (Nuclear factor 1/B) (CCAAT-box-binding transcription factor) (CTF) (Nuclear factor I/B) (NF-I/B) (NFI-B) (TGGCA-binding protein)	Nfib	NA	NA	NA	NA	NA	402432	347145	383824	NA	NA	NA	NA
P97868-1	P97868	E3 ubiquitin-protein ligase RBBP6 (EC 2.3.2.27) (Proliferation potential-related protein) (Protein P2P-R) (RING-type E3 ubiquitin transferase RBBP6) (Retinoblastoma-binding protein 6) (p53-associated cellular protein of testis)	Rbbp6	NA	NA	NA	NA	6.43352e+07	1.28506e+08	2.63493e+07	4.30056e+07	478274	145810	NA	332050
P98078	P98078	Disabled homolog 2 (Adaptor molecule disabled-2) (Differentially expressed in ovarian carcinoma 2) (DOC-2) (Mitogen-responsive phosphoprotein)	Dab2	NA	NA	NA	NA	3.41901e+07	5.83507e+07	1.86655e+07	2.18723e+07	6.56815e+06	1.97249e+06	4224864	6039120
P98083-1	P98083	SHC-transforming protein 1 (SHC-transforming protein A) (Src homology 2 domain-containing-transforming protein C1) (SH2 domain protein C1)	Shc1	NA	NA	NA	NA	NA	NA	NA	NA	873568	NA	1.3477e+06	304703
P99024	P99024	Tubulin beta-5 chain	Tubb5	1.80516e+07	2.44001e+07	1.906e+07	3.28716e+07	8.98345e+07	2.82977e+08	2.07393e+08	8.90257e+07	2.07059e+08	9.76099e+07	1.4699e+08	7.76813e+07
P99027	P99027	60S acidic ribosomal protein P2	Rplp2	NA	NA	NA	NA	NA	NA	908120	900840	NA	NA	NA	NA
P99028	P99028	Cytochrome b-c1 complex subunit 6, mitochondrial (Complex III subunit 6) (Complex III subunit VIII) (Cytochrome c1 non-heme 11 kDa protein) (Mitochondrial hinge protein) (Ubiquinol-cytochrome c reductase complex 11 kDa protein)	Uqcrh	NA	NA	NA	NA	NA	NA	NA	NA	NA	NA	NA	NA
P99029	P99029	Peroxiredoxin-5, mitochondrial (EC 1.11.1.24) (Antioxidant enzyme B166) (AOEB166) (Liver tissue 2D-page spot 2D-0014IV) (PLP) (Peroxiredoxin V) (Prx-V) (Peroxisomal antioxidant enzyme) (Thioredoxin peroxidase PMP20) (Thioredoxin-dependent peroxiredoxin 5)	Prdx5	1.78389e+06	8.26984e+06	1.09589e+07	1.14758e+07	2.59598e+07	2.07455e+07	2.2166e+07	2.63551e+07	6617522	NA	22383666	7.26379e+06
Q00422	Q00422	GA-binding protein alpha chain (GABP subunit alpha)	Gabpa	NA	NA	NA	NA	498807	625109	NA	NA	NA	NA	NA	NA
Q00612	Q00612	Glucose-6-phosphate 1-dehydrogenase X (G6PD) (EC 1.1.1.49)	G6pdx	NA	NA	NA	NA	929256	1.26837e+06	NA	230305	NA	NA	NA	NA
Q00PI9	Q00PI9	Heterogeneous nuclear ribonucleoprotein U-like protein 2 (MLF1-associated nuclear protein)	Hnrnpul2	NA	NA	NA	NA	5.80189e+06	3.0614e+06	2313607	3.85696e+06	NA	NA	3.04561e+06	484558
Q01320	Q01320	DNA topoisomerase 2-alpha (EC 5.6.2.2) (DNA topoisomerase II, alpha isozyme)	Top2a	NA	NA	NA	NA	2.68962e+06	5.97617e+06	1.93023e+06	996762	634035	371884	3.54625e+06	2.37917e+06
Q01705	Q01705	Neurogenic locus notch homolog protein 1 (Notch 1) (Motch A) (mT14) (p300) [Cleaved into: Notch 1 extracellular truncation (NEXT); Notch 1 intracellular domain (NICD)]	Notch1	NA	NA	NA	NA	NA	NA	NA	NA	2.19742e+06	338563	8.53813e+06	3.86055e+06
Q01768	Q01768	Nucleoside diphosphate kinase B (NDK B) (NDP kinase B) (EC 2.7.4.6) (Histidine protein kinase NDKB) (EC 2.7.13.3) (P18) (nm23-M2)	Nme2	NA	NA	NA	NA	NA	NA	NA	NA	113767	NA	1.99964e+06	548806
Q01853	Q01853	Transitional endoplasmic reticulum ATPase (TER ATPase) (EC 3.6.4.6) (15S Mg(2+)-ATPase p97 subunit) (Valosin-containing protein) (VCP)	Vcp	NA	NA	NA	NA	5.32846e+06	2.25082e+06	3.55015e+06	3.97368e+06	NA	NA	NA	NA
Q02053	Q02053	Ubiquitin-like modifier-activating enzyme 1 (EC 6.2.1.45) (Ubiquitin-activating enzyme E1) (Ubiquitin-activating enzyme E1 X) (Ubiquitin-like modifier-activating enzyme 1 X)	Uba1	NA	NA	NA	NA	3.94692e+06	4933064	651775	2.39654e+06	NA	NA	NA	NA
Q02248	Q02248	Catenin beta-1 (Beta-catenin)	Ctnnb1	NA	NA	NA	NA	2.84988e+06	3165928	1.67749e+06	2.41895e+06	7.57312e+06	2.27446e+06	2.08276e+07	1.31029e+07	2.65735
Q02257	Q02257	Junction plakoglobin (Desmoplakin III) (Desmoplakin-3)	Jup	NA	NA	NA	NA	531879	664428	1338354	NA	349151	265734	4.39379e+06	180904
Q03145	Q03145	Ephrin type-A receptor 2 (EC 2.7.10.1) (Epithelial cell kinase) (Tyrosine-protein kinase receptor ECK) (Tyrosine-protein kinase receptor MPK-5) (Tyrosine-protein kinase receptor SEK-2)	Epha2	NA	NA	NA	NA	3.06194e+06	5.48652e+06	2.54162e+06	3.87919e+06	274335	NA	NA	NA
Q03172	Q03172	Zinc finger protein 40 (Alpha A-crystallin-binding protein 1) (Alpha A-CRYBP1) (Alpha A-crystallin-binding protein I) (Transcription factor alphaA-CRYBP1)	Hivep1	NA	NA	NA	NA	NA	NA	298371	187253	NA	NA	NA	NA
Q03265	Q03265	ATP synthase subunit alpha, mitochondrial (ATP synthase F1 subunit alpha)	Atp5f1a	2.28745e+08	3.30922e+08	2.74636e+08	2.84899e+08	6.44192e+08	9.64745e+08	4.18083e+08	5.17781e+08	7.57946e+08	4.46772e+08	1.02651e+09	5.9639e+08
Q03963	Q03963	Interferon-induced, double-stranded RNA-activated protein kinase (EC 2.7.11.1) (Eukaryotic translation initiation factor 2-alpha kinase 2) (eIF-2A protein kinase 2) (Interferon-inducible RNA-dependent protein kinase) (P1/eIF-2A protein kinase) (Protein kinase RNA-activated) (PKR) (Protein kinase R) (Serine/threonine-protein kinase TIK) (Tyrosine-protein kinase EIF2AK2) (EC 2.7.10.2) (p68 kinase)	Eif2ak2	NA	NA	NA	NA	741115	851490	322280	488340	1.9026e+06	1.49475e+06	2.7539e+06	1.05782e+06
Q04690	Q04690	Neurofibromin (Neurofibromatosis-related protein NF-1)	Nf1	NA	NA	NA	NA	NA	NA	NA	NA	NA	316231	3457114	743709
Q04692	Q04692	SWI/SNF-related matrix-associated actin-dependent regulator of chromatin subfamily A containing DEAD/H box 1 (EC 3.6.4.12) (ATP-dependent helicase SMARCAD1) (Enhancer trap locus homolog 1) (Etl-1)	Smarcad1	NA	NA	NA	NA	NA	NA	NA	NA	NA	1.39855e+06	NA	NA
Q04736	Q04736	Tyrosine-protein kinase Yes (EC 2.7.10.2) (Proto-oncogene c-Yes) (p61-Yes)	Yes1	NA	NA	NA	NA	554792	1.01469e+06	400626	397731	8.35801e+06	1.74842e+06	1.69581e+07	7.56956e+06
Q04750	Q04750	DNA topoisomerase 1 (EC 5.6.2.1) (DNA topoisomerase I)	Top1	NA	NA	NA	NA	5.50319e+06	5.96284e+06	4.56244e+06	5.84479e+06	974870	284081	3.40126e+06	1.36562e+06
Q05512	Q05512	Serine/threonine-protein kinase MARK2 (EC 2.7.11.1) (EC 2.7.11.26) (ELKL motif kinase 1) (EMK-1) (MAP/microtubule affinity-regulating kinase 2) (PAR1 homolog) (PAR1 homolog b) (Par-1b) (mPar-1b)	Mark2	NA	NA	NA	NA	NA	NA	NA	NA	NA	NA	NA	NA
Q05769	Q05769	Prostaglandin G/H synthase 2 (EC 1.14.99.1) (Cyclooxygenase-2) (COX-2) (Glucocorticoid-regulated inflammatory cyclooxygenase) (Gripghs) (Macrophage activation-associated marker protein P71/73) (PES-2) (PHS II) (Prostaglandin H2 synthase 2) (PGH synthase 2) (PGHS-2) (Prostaglandin-endoperoxide synthase 2) (TIS10 protein)	Ptgs2	NA	NA	NA	NA	1.98137e+06	2.38449e+06	1.34275e+06	1.50189e+06	631260	NA	NA	430586
Q05816	Q05816	Fatty acid-binding protein 5 (Epidermal-type fatty acid-binding protein) (E-FABP) (Fatty acid-binding protein, epidermal) (Keratinocyte lipid-binding protein) (Psoriasis-associated fatty acid-binding protein homolog) (PA-FABP)	Fabp5	NA	NA	NA	NA	780616	686233	1.65547e+06	239634	1.03148e+06	156186	8127654	523014
Q05920	Q05920	Pyruvate carboxylase, mitochondrial (EC 6.4.1.1) (Pyruvic carboxylase) (PCB)	Pc	1.44249e+10	2.71151e+10	2.10962e+10	2.52e+10	2.34773e+10	2.74266e+10	1.95182e+10	2.22842e+10	1.66532e+10	1.88901e+10	3.1727e+10	2.07585e+10
Q05BC3	Q05BC3	Echinoderm microtubule-associated protein-like 1 (EMAP-1)	Eml1	NA	NA	NA	NA	1.0644e+06	NA	678926	NA	NA	NA	NA	NA
Q05CL8	Q05CL8	La-related protein 7 (La ribonucleoprotein domain family member 7)	Larp7	NA	NA	NA	NA	930394	971148	581301	733322	NA	NA	NA	NA
Q05D44	Q05D44	Eukaryotic translation initiation factor 5B (eIF-5B) (EC 3.6.5.3) (Translation initiation factor IF-2)	Eif5b	NA	NA	NA	NA	2.2249e+06	3.66472e+06	1.1437e+06	1.58915e+06	NA	NA	NA	NA
Q06180-1	Q06180	Tyrosine-protein phosphatase non-receptor type 2 (Protein-tyrosine phosphatase PTP-2) (EC 3.1.3.48) (MPTP)	Ptpn2	NA	NA	NA	NA	1.59546e+06	1.71482e+06	1.0982e+06	1.2575e+06	NA	NA	NA	NA
Q07076	Q07076	Annexin A7 (Annexin VII) (Annexin-7) (Synexin)	Anxa7	NA	NA	NA	NA	5.73869e+06	1.14739e+06	5.296e+06	6.86903e+06	1.73845e+06	3.35453e+06	1.70788e+07	7287794
Q07231	Q07231	Zinc finger and SCAN domain-containing protein 21 (CtFIN51) (Transcription factor RU49) (Zinc finger protein 38) (Zfp-38)	Zscan21	NA	NA	NA	NA	482725	595027	345491	370967	NA	NA	NA	NA
Q07417	Q07417	Short-chain specific acyl-CoA dehydrogenase, mitochondrial (SCAD) (EC 1.3.8.1) (Butyryl-CoA dehydrogenase)	Acads	NA	NA	NA	NA	NA	NA	NA	NA	NA	NA	NA	NA
Q08093	Q08093	Calponin-2 (Calponin H2, smooth muscle) (Neutral calponin)	Cnn2	NA	NA	NA	NA	726287	1.73629e+06	464169	539391	2.32563e+06	143057	NA	640866
Q08189	Q08189	Protein-glutamine gamma-glutamyltransferase E (EC 2.3.2.13) (Transglutaminase E) (TG(E)) (TGE) (TGase E) (Transglutaminase-3) (TGase-3) [Cleaved into: Protein-glutamine gamma-glutamyltransferase E 50 kDa catalytic chain; Protein-glutamine gamma-glutamyltransferase E 27 kDa non-catalytic chain]	Tgm3	NA	NA	NA	NA	NA	NA	NA	NA	NA	NA	3.76353e+06	NA
Q08288	Q08288	Cell growth-regulating nucleolar protein (Ly1 antibody-reactive protein) (Protein expressed in male leptotene and zygotene spermatocytes 264) (MLZ-264)	Lyar	NA	NA	NA	NA	1.56378e+06	2.04941e+06	988935	1.11428e+06	NA	NA	NA	NA
Q08481-1	Q08481	Platelet endothelial cell adhesion molecule (PECAM-1) (CD antigen CD31)	Pecam1	NA	NA	NA	NA	NA	1.19828e+06	596582	901231	NA	NA	1.07885e+06	865951
Q08509	Q08509	Epidermal growth factor receptor kinase substrate 8	Eps8	NA	NA	NA	NA	1.3362e+06	1.75353e+06	924877	1.02383e+06	4.29047e+07	2.89855e+06	1.5206e+07	1.95658e+07
Q0GNC1	Q0GNC1	Inverted formin-2	Inf2	NA	NA	NA	NA	1.07515e+08	1.46706e+08	4.80404e+07	6.97456e+07	884127	107341	2.33874e+06	1.01224e+06
Q0KL02	Q0KL02	Triple functional domain protein (EC 2.7.11.1)	Trio	NA	NA	NA	NA	NA	NA	NA	NA	9.21412e+06	1.28011e+06	3.41444e+07	1.11341e+07
Q0P678	Q0P678	Zinc finger CCCH domain-containing protein 18 (Nuclear protein NHN1)	Zc3h18	NA	NA	NA	NA	4.64543e+07	1.20164e+08	1.88247e+07	3.39602e+07	NA	NA	NA	NA
Q0VGY8	Q0VGY8	Protein TANC1 (Tetratricopeptide repeat, ankyrin repeat and coiled-coil domain-containing protein 1)	Tanc1	NA	NA	NA	NA	22640504	3.24068e+07	1.0058e+07	1.45951e+07	1.97969e+07	1.65141e+06	2.35212e+07	1.40819e+07
Q149C2	Q149C2	TRAF3-interacting protein 1 (Intraflagellar transport protein 54 homolog) (Microtubule-interacting protein associated with TRAF3) (MIP-T3)	Traf3ip1	NA	NA	NA	NA	5.07072e+06	5546912	3518736	3.83296e+06	NA	NA	NA	NA
Q14AX6-1	Q14AX6	Cyclin-dependent kinase 12 (EC 2.7.11.22) (EC 2.7.11.23) (Cdc2-related kinase, arginine/serine-rich) (CrkRS) (Cell division cycle 2-related protein kinase 7) (CDC2-related protein kinase 7) (Cell division protein kinase 12)	Cdk12	NA	NA	NA	NA	1.87048e+07	2.10695e+07	1.28389e+07	1.46813e+07	NA	NA	NA	NA
Q14B71	Q14B71	Cell division cycle-associated protein 2	Cdca2	NA	NA	NA	NA	NA	NA	NA	NA	NA	NA	NA	NA
Q14DQ1	Q14DQ1	Protein FAM219B	Fam219b	NA	NA	NA	NA	393731	550226	174351	280361	NA	NA	NA	NA
Q1RNF8	Q1RNF8	Sterile alpha motif domain-containing protein 11 (SAM domain-containing protein 11) (Major retinal SAM domain-containing protein) (Mr-s)	Samd11	NA	NA	NA	NA	NA	NA	NA	NA	746956	290928	1.38807e+06	727995
Q1W617-1	Q1W617	Protein Shroom4	Shroom4	NA	NA	NA	NA	3.49954e+07	5.54295e+07	1.87765e+07	2.55933e+07	2.71351e+07	7.81856e+06	1.17237e+07	2.13856e+07
Q2KN98	Q2KN98	Cytospin-A (SPECC1-like protein) (Sperm antigen with calponin homology and coiled-coil domains 1-like)	Specc1l	NA	NA	NA	NA	3.29605e+06	3.51469e+06	862750	1.78757e+06	NA	NA	NA	NA
Q2NL51	Q2NL51	Glycogen synthase kinase-3 alpha (GSK-3 alpha) (EC 2.7.11.26) (Serine/threonine-protein kinase GSK3A) (EC 2.7.11.1)	Gsk3a	NA	NA	NA	NA	NA	NA	NA	NA	3.07663e+06	81496.4	563704	939333
Q2QI47-1	Q2QI47	Usherin (Usher syndrome type IIa protein homolog) (Usher syndrome type-2A protein homolog)	Ush2A	NA	NA	NA	NA	NA	NA	NA	NA	546696	NA	NA	281843
Q2TBE6	Q2TBE6	Phosphatidylinositol 4-kinase type 2-alpha (EC 2.7.1.67) (Phosphatidylinositol 4-kinase type II-alpha)	Pi4k2a	NA	NA	NA	NA	NA	NA	NA	NA	NA	NA	NA	NA
Q2VLH6-1	Q2VLH6	Scavenger receptor cysteine-rich type 1 protein M130 (CD antigen CD163) [Cleaved into: Soluble CD163 (sCD163)]	Cd163	NA	NA	NA	NA	NA	NA	NA	NA	NA	NA	NA	NA
Q2VPD4-1	Q2VPD4	Basic helix-loop-helix ARNT-like protein 2 (Aryl hydrocarbon receptor nuclear translocator-like protein 2) (Brain and muscle ARNT-like 2)	Bmal2	378738	55484.1	2.39562e+06	2.58225e+06	NA	NA	NA	NA	NA	NA	NA	NA
Q30D77	Q30D77	Collagen alpha-1(XXIV) chain	Col24a1	NA	NA	NA	NA	17875662	15984093	12935940	16567832	NA	NA	NA	NA
Q31125	Q31125	Zinc transporter SLC39A7 (Histidine-rich membrane protein Ke4) (Solute carrier family 39 member 7) (Zrt-, Irt-like protein 7) (ZIP7)	Slc39a7	NA	NA	NA	NA	459559	336778	292255	284686	NA	NA	NA	NA
Q3TC46	Q3TC46	Protein PAT1 homolog 1 (PAT1-like protein 1) (Protein PAT1 homolog b) (Pat1b)	Patl1	NA	NA	NA	NA	1.05002e+06	890757	399009	1.26345e+06	NA	NA	NA	NA
Q3TEA8-1	Q3TEA8	Heterochromatin protein 1-binding protein 3	Hp1bp3	NA	NA	NA	NA	2.80802e+06	2.84571e+06	1.38657e+06	1.05493e+06	NA	NA	NA	NA
Q3TFK5	Q3TFK5	G patch domain-containing protein 4	Gpatch4	NA	NA	NA	NA	1.0025e+07	15125196	4.66628e+06	7.25277e+06	NA	NA	NA	NA
Q3THE2	Q3THE2	Myosin regulatory light chain 12B (Myosin regulatory light chain 2-B, smooth muscle isoform) (Myosin regulatory light chain 20 kDa) (MLC20) (Myosin regulatory light chain MRLC2)	Myl12b	NA	NA	NA	NA	1.94863e+06	2.16665e+06	3.04097e+06	4.3942e+06	NA	NA	NA	NA
Q3THK3	Q3THK3	General transcription factor IIF subunit 1 (Transcription initiation factor IIF subunit alpha) (TFIIF-alpha)	Gtf2f1	NA	NA	NA	NA	587182	1.81812e+06	NA	NA	NA	NA	17256418	NA
Q3THW5	Q3THW5	Histone H2A.V (H2A.F/Z) (H2A.Z variant histone 2)	H2az2	NA	NA	NA	NA	3715648	5.63697e+06	3.23315e+06	3.67145e+06	NA	NA	NA	NA
Q3TIV5-1	Q3TIV5	Zinc finger CCCH domain-containing protein 15 (DRG family-regulatory protein 1) (Epo-immediate response gene protein FM22)	Zc3h15	NA	NA	NA	NA	NA	NA	NA	792698	NA	NA	NA	NA
Q3TJD7	Q3TJD7	PDZ and LIM domain protein 7 (LIM mineralization protein) (LMP) (Protein enigma)	Pdlim7	NA	NA	NA	NA	7.18593e+06	1.04818e+07	4.16124e+06	5.44375e+06	2.72853e+07	2.24394e+06	4.42419e+06	1.15943e+07
Q3TKT4-1	Q3TKT4	Transcription activator BRG1 (EC 3.6.4.-) (ATP-dependent helicase SMARCA4) (BRG1-associated factor 190A) (BAF190A) (Protein brahma homolog 1) (SNF2-beta) (SWI/SNF-related matrix-associated actin-dependent regulator of chromatin subfamily A member 4)	Smarca4	NA	NA	NA	NA	2.88094e+06	4.26774e+06	1.18896e+06	2.77399e+06	NA	NA	867204	440690
Q3TKY6	Q3TKY6	Spliceosome-associated protein CWC27 homolog (Probable inactive peptidyl-prolyl cis-trans isomerase CWC27 homolog) (PPIase CWC27)	Cwc27	NA	NA	NA	NA	1.60897e+06	1.55989e+06	NA	NA	NA	NA	NA	NA
Q3TLH4	Q3TLH4	Protein PRRC2C (BAT2 domain-containing protein 1) (HLA-B-associated transcript 2-like 2) (Proline-rich and coiled-coil-containing protein 2C)	Prrc2c	NA	NA	NA	NA	2.9086e+08	3.65682e+08	1.56471e+08	2.14895e+08	1.95051e+06	287245	NA	2.07499e+06
Q3TMW1	Q3TMW1	Coiled-coil domain-containing protein 102A	Ccdc102a	NA	NA	NA	NA	NA	NA	NA	NA	1.14633e+07	831148	1703756	6.01337e+06
Q3TN34	Q3TN34	MICAL-like protein 2 (Junctional Rab13-binding protein) (Molecule interacting with CasL-like 2) (MICAL-L2)	Micall2	NA	NA	NA	NA	4.70378e+07	6.24113e+07	2.40153e+07	3.72367e+07	1.32295e+07	5.5819e+06	1.40417e+07	1.35475e+07
Q3TRM4	Q3TRM4	Patatin-like phospholipase domain-containing protein 6 (Neuropathy target esterase) (EC 3.1.1.5)	Pnpla6	NA	NA	NA	NA	789188	1.09055e+06	289680	471163	NA	NA	NA	NA
Q3TSG4	Q3TSG4	RNA demethylase ALKBH5 (EC 1.14.11.53) (Alkylated DNA repair protein alkB homolog 5) (Alpha-ketoglutarate-dependent dioxygenase alkB homolog 5)	Alkbh5	NA	NA	NA	NA	NA	NA	NA	NA	NA	300104	NA	216894
Q3TTY5	Q3TTY5	Keratin, type II cytoskeletal 2 epidermal (Cytokeratin-2e) (CK-2e) (Epithelial keratin-2e) (Keratin-2 epidermis) (Keratin-2e) (K2e) (Type-II keratin Kb2)	Krt2	3.99416e+06	1.21819e+07	3.51649e+07	2.54577e+07	2.54089e+07	1.70562e+07	4.164e+07	1.10536e+07	2.9495e+07	4.63811e+07	2.6459e+08	19982262
Q3TUF7	Q3TUF7	YEATS domain-containing protein 2	Yeats2	NA	NA	NA	NA	3.95417e+06	7.13174e+06	3.43402e+06	4.96761e+06	264317	NA	NA	306750
Q3TUH1	Q3TUH1	Phosphatidate cytidylyltransferase, mitochondrial (EC 2.7.7.41) (CDP-diacylglycerol synthase) (CDP-DAG synthase) (Mitochondrial translocator assembly and maintenance protein 41 homolog) (TAM41)	Tamm41	NA	NA	NA	NA	NA	NA	NA	NA	1.02909e+06	NA	NA	994575
Q3TW96-1	Q3TW96	UDP-N-acetylhexosamine pyrophosphorylase-like protein 1 (EC 2.7.7.-)	Uap1l1	NA	NA	NA	NA	NA	NA	NA	NA	NA	NA	NA	NA
Q3TWW8	Q3TWW8	Serine/arginine-rich splicing factor 6 (Pre-mRNA-splicing factor SRP55) (Splicing factor, arginine/serine-rich 6)	Srsf6	558842	193857	NA	NA	62960.7	200179	NA	NA	8.62933e+06	2.27519e+06	2.29452e+06	3.41961e+06
Q3TXT3	Q3TXT3	SOSS complex subunit C (INTS3- and NABP-interacting protein) (Sensor of single-strand DNA complex subunit C) (Sensor of ssDNA subunit C) (SOSS-C) (Single-stranded DNA-binding protein-interacting protein 1) (SSB-interacting protein 1)	Inip	NA	NA	NA	NA	NA	499725	175738	247561	NA	NA	NA	NA
Q3TYA6	Q3TYA6	M-phase phosphoprotein 8	Mphosph8	NA	NA	NA	NA	NA	NA	NA	NA	NA	NA	NA	NA
Q3TZZ7-1	Q3TZZ7	Extended synaptotagmin-2 (E-Syt2)	Esyt2	NA	NA	NA	NA	7449643	5919784	3.76543e+06	4.88522e+06	374485	182659	1.2919e+06	84872.1
Q3U0S6	Q3U0S6	Ras-interacting protein 1 (Rain)	Rasip1	NA	3.89181e+06	NA	7.06194e+06	1.74678e+07	41901380	8.40876e+06	8.21213e+06	2.01284e+07	5.9034e+06	1.15761e+07	8.24546e+06
Q3U0V1	Q3U0V1	Far upstream element-binding protein 2 (FUSE-binding protein 2) (KH type-splicing regulatory protein) (KSRP)	Khsrp	NA	161269	NA	485675	3.77473e+07	3.77947e+07	2.18896e+07	2.78105e+07	7.06425e+06	925082	8.22634e+06	6.23905e+06
Q3U1G5	Q3U1G5	Interferon-stimulated 20 kDa exonuclease-like 2 (EC 3.1.-.-)	Isg20l2	NA	NA	NA	NA	663026	1.22527e+06	501419	NA	NA	NA	NA	NA
Q3U285-1	Q3U285	Ligand-dependent nuclear receptor corepressor-like protein (LCoR-like protein) (Mblk1-related protein 1) (Transcription factor MLR1)	Lcorl	NA	NA	NA	NA	276345	196434	NA	227348	NA	NA	NA	NA
Q3U319	Q3U319	E3 ubiquitin-protein ligase BRE1B (BRE1-B) (EC 2.3.2.27) (RING finger protein 40) (RING-type E3 ubiquitin transferase BRE1B)	Rnf40	NA	NA	NA	NA	387784	425503	NA	363838	NA	NA	NA	NA
Q3U5C7	Q3U5C7	Prickle-like protein 1	Prickle1	NA	NA	NA	NA	NA	NA	NA	NA	607005	NA	NA	NA
Q3U5Q7	Q3U5Q7	UMP-CMP kinase 2, mitochondrial (EC 2.7.4.14) (Nucleoside-diphosphate kinase) (EC 2.7.4.6) (Thymidylate kinase LPS-inducible member) (TYKi)	Cmpk2	NA	3.59584e+06	3.69706e+06	4.62052e+06	3.0335e+06	6.03077e+06	2.41757e+06	3.87669e+06	4.69101e+06	439077	591973	5.27063e+06
Q3U6K5	Q3U6K5	Spermatogenesis-associated protein 6 (Kinesin-related protein)	Spata6	NA	NA	NA	NA	NA	NA	NA	NA	5.40198e+06	NA	2.40431e+06	1.83896e+06
Q3U7R1	Q3U7R1	Extended synaptotagmin-1 (E-Syt1) (Membrane-bound C2 domain-containing protein)	Esyt1	NA	NA	NA	NA	1.41001e+07	9.54404e+06	3.6786e+06	8.58606e+06	NA	NA	NA	NA
Q3U9G9	Q3U9G9	Delta(14)-sterol reductase LBR (Delta-14-SR) (EC 1.3.1.70) (3-beta-hydroxysterol Delta (14)-reductase) (C-14 sterol reductase) (C14SR) (Integral nuclear envelope inner membrane protein) (Lamin-B receptor) (Sterol C14-reductase)	Lbr	NA	NA	NA	NA	6.8874e+06	7.33106e+06	1.58216e+07	4.86803e+06	955085	NA	NA	963784
Q3UFM5	Q3UFM5	Nucleolar MIF4G domain-containing protein 1 (SGD1 homolog)	Nom1	NA	NA	NA	NA	NA	NA	NA	NA	200854	97901.4	327007	223990
Q3UFY8	Q3UFY8	tRNA methyltransferase 10 homolog C (Mitochondrial ribonuclease P protein 1) (Mitochondrial RNase P protein 1) (RNA (guanine-9-)-methyltransferase domain-containing protein 1) (mRNA methyladenosine-N(1)-methyltransferase) (EC 2.1.1.-) (tRNA (adenine(9)-N(1))-methyltransferase) (EC 2.1.1.218) (tRNA (guanine(9)-N(1))-methyltransferase) (EC 2.1.1.221)	Trmt10c	NA	NA	NA	NA	565954	605405	295095	264802	NA	NA	NA	NA
Q3UH60-1	Q3UH60	Disco-interacting protein 2 homolog B (DIP2 homolog B)	Dip2b	NA	NA	NA	NA	515368	677119	328376	409828	1.42577e+06	NA	NA	754836
Q3UH93	Q3UH93	Plexin-D1	Plxnd1	NA	NA	NA	NA	NA	NA	NA	NA	NA	NA	NA	NA
Q3UHA3	Q3UHA3	Spatacsin (Spastic paraplegia 11 protein homolog)	Spg11	NA	NA	NA	NA	NA	NA	NA	NA	6154093	1803522	23606724	2.87518e+06
Q3UHC0	Q3UHC0	Trinucleotide repeat-containing gene 6C protein	Tnrc6c	NA	NA	NA	NA	2.90877e+06	4.60071e+06	1.29218e+06	1.83845e+06	1.0166e+06	NA	NA	NA
Q3UHC7	Q3UHC7	Disabled homolog 2-interacting protein (DAB2-interacting protein) (ASK-interacting protein 1) (DOC-2/DAB-2 interactive protein)	Dab2ip	NA	NA	NA	NA	431213	845895	444672	387052	528422	NA	NA	346886
Q3UHJ0	Q3UHJ0	AP2-associated protein kinase 1 (EC 2.7.11.1) (Adaptor-associated kinase 1)	Aak1	NA	NA	NA	NA	9.12146e+06	1.15515e+07	6.52069e+06	6.55784e+06	530088	NA	NA	NA
Q3UHK8	Q3UHK8	Trinucleotide repeat-containing gene 6A protein	Tnrc6a	NA	NA	NA	NA	4.82841e+06	5.57505e+06	2.92957e+06	2.8862e+06	4.16481e+06	334050	3.77088e+06	3.10125e+06
Q3UHX0-1	Q3UHX0	Nucleolar protein 8	Nol8	NA	NA	NA	NA	6.25668e+07	8.34027e+07	3.29511e+07	4.24785e+07	921222	NA	326209	781382
Q3UHX2	Q3UHX2	28 kDa heat- and acid-stable phosphoprotein (PDGF-associated protein) (PAP) (PDGFA-associated protein 1) (PAP1)	Pdap1	NA	NA	NA	NA	2.46708e+07	1.2519e+07	1.23286e+07	1.98071e+07	429893	180557	6.51931e+06	212036
Q3UIA2	Q3UIA2	Rho GTPase-activating protein 17 (Neuron-associated developmentally-regulated protein) (Nadrin) (Rho-type GTPase-activating protein 17)	Arhgap17	NA	NA	NA	NA	NA	NA	NA	NA	1.10345e+08	8.3736e+06	1.13231e+08	9.72896e+07
Q3UIL6-1	Q3UIL6	Pleckstrin homology domain-containing family A member 7 (PH domain-containing family A member 7) (Heart adapter protein 1)	Plekha7	NA	NA	NA	NA	8.34722e+06	23563028	10385221	7805906	1.19118e+06	305676	2.29385e+06	1.07918e+06
Q3UIR3-1	Q3UIR3	E3 ubiquitin-protein ligase DTX3L (EC 2.3.2.27) (Protein deltex-3-like) (RING-type E3 ubiquitin transferase DTX3L)	Dtx3l	NA	NA	NA	NA	2.07218e+06	3.09803e+06	1.98639e+06	3.56498e+06	2.29934e+06	NA	4.9872e+06	3.32471e+06
Q3UJB9	Q3UJB9	Enhancer of mRNA-decapping protein 4	Edc4	NA	NA	NA	NA	1.25717e+08	2.51114e+08	5.95845e+07	9.51558e+07	NA	NA	NA	NA
Q3UKJ7	Q3UKJ7	WD40 repeat-containing protein SMU1 (Smu-1 suppressor of mec-8 and unc-52 protein homolog) [Cleaved into: WD40 repeat-containing protein SMU1, N-terminally processed]	Smu1	NA	NA	NA	NA	194646	374622	289528	349193	NA	NA	NA	NA
Q3ULD5	Q3ULD5	Methylcrotonoyl-CoA carboxylase beta chain, mitochondrial (MCCase subunit beta) (EC 6.4.1.4) (3-methylcrotonyl-CoA carboxylase 2) (3-methylcrotonyl-CoA carboxylase non-biotin-containing subunit) (3-methylcrotonyl-CoA:carbon dioxide ligase subunit beta)	Mccc2	189440	608947	967089	2.32888e+06	7.26366e+06	5.35366e+06	4.96937e+06	4.91452e+06	7.06408e+06	4.5628e+06	2.05332e+07	1.12587e+07
Q3UM18	Q3UM18	Large subunit GTPase 1 homolog (EC 3.6.1.-)	Lsg1	NA	NA	NA	NA	3.0802e+06	1.28689e+07	465760	1.33513e+06	NA	NA	NA	NA
Q3UMB9	Q3UMB9	WASH complex subunit 4 (WASH complex subunit SWIP)	Washc4	NA	NA	NA	NA	NA	NA	NA	NA	4.89689e+06	1.80323e+08	2.02019e+07	1.26278e+07
Q3UMF0	Q3UMF0	Cordon-bleu protein-like 1 (Cobl-related protein 1)	Cobll1	NA	NA	NA	NA	6.04004e+07	9.13051e+07	3.79347e+07	4.89029e+07	7.95825e+06	163848	4.65519e+06	3.86143e+06
Q3UMR5-1	Q3UMR5	Calcium uniporter protein, mitochondrial	Mcu	NA	NA	NA	NA	NA	NA	NA	NA	924253	884924	646907	1.99079e+06
Q3UMT1	Q3UMT1	Protein phosphatase 1 regulatory subunit 12C (Protein phosphatase 1 myosin-binding subunit of 85 kDa) (Protein phosphatase 1 myosin-binding subunit p85)	Ppp1r12c	NA	NA	NA	NA	1.1468e+06	1.4103e+06	715088	577191	NA	NA	NA	NA
Q3UMU9	Q3UMU9	Hepatoma-derived growth factor-related protein 2 (HRP-2)	Hdgfl2	NA	NA	NA	NA	1.07841e+06	7561976	2444417	4324490	NA	NA	NA	NA
Q3UN04	Q3UN04	Ubiquitin carboxyl-terminal hydrolase 30 (EC 3.4.19.12) (Deubiquitinating enzyme 30) (Ubiquitin thioesterase 30) (Ubiquitin-specific-processing protease 30) (Ub-specific protease 30)	Usp30	NA	NA	NA	NA	NA	NA	NA	NA	177544	NA	279162	NA
Q3UPF5-1	Q3UPF5	Zinc finger CCCH-type antiviral protein 1 (ADP-ribosyltransferase diphtheria toxin-like 13) (ARTD13) (Inactive Poly [ADP-ribose] polymerase 13) (PARP13)	Zc3hav1	NA	NA	NA	NA	1.15933e+08	1.2065e+08	5.31768e+07	9.50968e+07	4.88081e+07	4.63819e+06	6.70364e+07	4.06815e+07
Q3UPH7-1	Q3UPH7	Rho guanine nucleotide exchange factor 40 (Protein SOLO)	Arhgef40	NA	NA	NA	NA	NA	NA	NA	NA	949554	1.74623e+06	679571	591862
Q3UPL0	Q3UPL0	Protein transport protein Sec31A (SEC31-like protein 1) (SEC31-related protein A)	Sec31a	NA	NA	NA	NA	3.77518e+06	7.79857e+06	5.13996e+06	5.70042e+06	372900	NA	101708	163437
Q3UPP8-1	Q3UPP8	Centrosomal protein of 63 kDa (Cep63)	Cep63	NA	NA	NA	NA	NA	NA	NA	NA	NA	NA	NA	NA
Q3UQU0	Q3UQU0	Bromodomain-containing protein 9	Brd9	NA	NA	NA	NA	1.69264e+06	1536819	782581	1.15523e+06	NA	NA	NA	NA
Q3URQ7	Q3URQ7	Methenyltetrahydrofolate synthase domain-containing protein	Mthfsd	NA	NA	NA	NA	95579856	58474528	19528858	39554064	NA	NA	NA	NA
Q3USJ8-1	Q3USJ8	F-BAR and double SH3 domains protein 2 (Protein nervous wreck 1) (NWK1) (SH3 multiple domains protein 3)	Fchsd2	NA	NA	NA	NA	NA	NA	NA	NA	563903	NA	NA	NA
Q3UTJ2-2	Q3UTJ2	Sorbin and SH3 domain-containing protein 2 (Arg-binding protein 2) (ArgBP2) (Arg/Abl-interacting protein 2)	Sorbs2	NA	NA	NA	NA	NA	NA	NA	NA	3.63491e+08	1.42297e+08	2.44355e+08	1.93388e+08
Q3UTJ2-4	Q3UTJ2	Sorbin and SH3 domain-containing protein 2 (Arg-binding protein 2) (ArgBP2) (Arg/Abl-interacting protein 2)	Sorbs2	NA	NA	NA	NA	NA	NA	NA	NA	15720179	NA	4.28293e+06	2.72958e+06
Q3UTJ2-5	Q3UTJ2	Sorbin and SH3 domain-containing protein 2 (Arg-binding protein 2) (ArgBP2) (Arg/Abl-interacting protein 2)	Sorbs2	NA	NA	NA	NA	7.64895e+07	9.62609e+07	4.45491e+07	4.74605e+07	NA	NA	NA	NA
Q3UU96-1	Q3UU96	Serine/threonine-protein kinase MRCK alpha (EC 2.7.11.1) (CDC42-binding protein kinase alpha)	Cdc42bpa	NA	NA	NA	NA	NA	NA	NA	NA	NA	33765.8	2.25838e+06	NA
Q3UV17	Q3UV17	Keratin, type II cytoskeletal 2 oral (Keratin-76) (K76) (Type-II keratin Kb9)	Krt76	1.41675e+07	7.75307e+06	1.76426e+07	6.5595e+06	23577866	1.23696e+06	27847196	3.87634e+06	1.71462e+06	37386973	28763884	5125185
Q3UVG3	Q3UVG3	Protein FAM91A1	Fam91a1	NA	NA	NA	NA	1.29415e+06	2.58263e+06	980905	1.13891e+06	NA	NA	621000	NA
Q3UVL4-1	Q3UVL4	Vacuolar protein sorting-associated protein 51 homolog (Protein fat-free homolog)	Vps51	NA	NA	NA	NA	3.50866e+06	3.35593e+06	2581009	2.1401e+06	1.3275e+06	817641	NA	658096
Q3UVV9	Q3UVV9	von Willebrand factor A domain-containing protein 3A	Vwa3a	NA	NA	NA	NA	NA	NA	NA	NA	NA	NA	1676509	NA
Q3UZ39-1	Q3UZ39	Leucine-rich repeat flightless-interacting protein 1 (LRR FLII-interacting protein 1) (FLI-LRR-associated protein 1) (Flap-1) (H186 FLAP)	Lrrfip1	NA	NA	NA	NA	4.05544e+06	7.00052e+06	1.76004e+06	2.24501e+06	NA	NA	NA	NA
Q3V0J1-1	Q3V0J1	Transmembrane protein 237 (Amyotrophic lateral sclerosis 2 chromosomal region candidate gene 4 protein homolog)	Tmem237	NA	NA	NA	NA	214786	283830	44436.2	77057	NA	NA	NA	NA
Q3V1H1	Q3V1H1	Cytoskeleton-associated protein 2	Ckap2	NA	NA	NA	NA	1.05026e+06	1.92939e+06	782261	674509	NA	NA	NA	NA
Q3V1V3	Q3V1V3	ESF1 homolog (ABT1-associated protein)	Esf1	NA	NA	NA	NA	64426169	8.07215e+07	3.25135e+07	3.68693e+07	1274575	1.21891e+06	1.28151e+06	402204
Q3V3R1	Q3V3R1	Monofunctional C1-tetrahydrofolate synthase, mitochondrial (EC 6.3.4.3) (Formyltetrahydrofolate synthetase)	Mthfd1l	NA	NA	NA	NA	6.19556e+06	1.27503e+07	6.32142e+06	7.22783e+06	1.13409e+07	483967	1.95245e+07	1.03666e+07
Q497I4	Q497I4	Keratin, type I cuticular Ha5 (Hair keratin, type I Ha5) (Keratin-35) (K35)	Krt35	NA	NA	NA	NA	NA	NA	NA	NA	NA	1.75871e+06	2267597	144776
Q497J1	Q497J1	Lysoplasmalogenase (EC 3.3.2.2) (Transmembrane protein 86B)	Tmem86b	NA	NA	NA	NA	18056860	24125616	14474314	14635772	NA	NA	NA	NA
Q497V5	Q497V5	S1 RNA-binding domain-containing protein 1	Srbd1	NA	NA	NA	NA	NA	NA	NA	NA	NA	NA	NA	NA
Q499X9	Q499X9	Methionine--tRNA ligase, mitochondrial (EC 6.1.1.10) (Methionyl-tRNA synthetase 2) (Mitochondrial methionyl-tRNA synthetase) (MtMetRS)	Mars2	NA	NA	NA	NA	NA	NA	NA	NA	1.99559e+06	1.1627e+06	1.89804e+06	1.72611e+06
Q4ACU6	Q4ACU6	SH3 and multiple ankyrin repeat domains protein 3 (Shank3) (Proline-rich synapse-associated protein 2) (ProSAP2) (SPANK-2)	Shank3	6.9177e+06	2.39423e+06	1.9339e+06	9.33128e+06	1.59362e+08	3.9944e+08	7.58145e+07	1.27764e+08	3.3153e+11	1.70143e+11	2.02781e+11	1.6801e+11
Q4ACU6-12	Q4ACU6	SH3 and multiple ankyrin repeat domains protein 3 (Shank3) (Proline-rich synapse-associated protein 2) (ProSAP2) (SPANK-2)	Shank3	NA	NA	NA	NA	NA	NA	NA	NA	7.47574e+06	NA	3.1712e+06	4.48185e+06
Q4ACU6-2	Q4ACU6	SH3 and multiple ankyrin repeat domains protein 3 (Shank3) (Proline-rich synapse-associated protein 2) (ProSAP2) (SPANK-2)	Shank3	NA	NA	NA	NA	NA	NA	NA	NA	3.18596e+09	1.64165e+09	1.1365e+09	7.86198e+08
Q4FZC9-1	Q4FZC9	Nesprin-3 (KASH domain-containing protein 3) (KASH3) (Nuclear envelope spectrin repeat protein 3)	Syne3	NA	NA	NA	NA	606785	708621	546491	689722	NA	NA	NA	NA
Q4G0F8	Q4G0F8	Ubinuclein-1 (Ubiquitously expressed nuclear protein)	Ubn1	NA	NA	NA	NA	758362	1.09754e+06	361554	439918	NA	NA	NA	NA
Q4JIM5	Q4JIM5	Tyrosine-protein kinase ABL2 (EC 2.7.10.2) (Abelson murine leukemia viral oncogene homolog 2) (Abelson tyrosine-protein kinase 2) (Abelson-related gene protein) (Tyrosine-protein kinase ARG)	Abl2	NA	NA	NA	NA	369115	579232	467538	532783	7.22398e+06	1.22441e+06	1.43199e+06	1.92061e+06
Q4JK59	Q4JK59	Methylcytosine dioxygenase TET2 (EC 1.14.11.80) (Protein Ayu17-449)	Tet2	NA	NA	NA	NA	62771.6	89866.3	47036.9	76358.1	NA	NA	NA	NA
Q4KMM3-1	Q4KMM3	Oxidation resistance protein 1 (Protein C7)	Oxr1	NA	NA	NA	NA	2.31936e+06	2.07624e+06	NA	1.09484e+06	NA	NA	NA	NA
Q4KWH5	Q4KWH5	1-phosphatidylinositol 4,5-bisphosphate phosphodiesterase eta-1 (EC 3.1.4.11) (Phosphoinositide phospholipase C-eta-1) (Phospholipase C-eta-1) (PLC-eta-1) (Phospholipase C-like protein 3) (PLC-L3)	Plch1	NA	NA	NA	NA	2147169	2406881	1.22018e+06	1.85297e+06	1.00727e+06	NA	4.00277e+06	1.38288e+06
Q4VA45	Q4VA45	Zinc finger translocation-associated protein (ZFTA)	Zfta	NA	NA	NA	NA	NA	NA	3.82859e+06	3.95699e+06	NA	NA	NA	NA
Q4VA53	Q4VA53	Sister chromatid cohesion protein PDS5 homolog B (Androgen-induced proliferation inhibitor) (Androgen-induced prostate proliferative shutoff-associated protein AS3)	Pds5b	NA	NA	NA	NA	2.18855e+06	2.99008e+06	1.49185e+06	2046029	819394	NA	651406	NA
Q4VAA2-1	Q4VAA2	Protein CDV3 (Carnitine deficiency-associated protein 3) (Tyrosine-phosphorylated protein 36) (TPP36)	Cdv3	NA	NA	NA	NA	1.45335e+07	19432601	7.83038e+06	1.02346e+07	6413109	918008	704810	2.68206e+06
Q4VAA7	Q4VAA7	Sorting nexin-33 (SH3 and PX domain-containing protein 3)	Snx33	NA	NA	NA	NA	NA	NA	NA	NA	730097	NA	9009122	986451
Q4VAC9	Q4VAC9	Pleckstrin homology domain-containing family G member 3 (PH domain-containing family G member 3)	Plekhg3	NA	NA	NA	NA	1.01222e+07	1.86657e+07	6.67166e+06	1.01781e+07	NA	NA	819122	227054
Q4VBD2	Q4VBD2	Transmembrane anterior posterior transformation protein 1	Tapt1	NA	NA	NA	NA	NA	NA	NA	NA	NA	NA	NA	NA
Q4VBE8	Q4VBE8	WD repeat-containing protein 18	Wdr18	NA	NA	NA	NA	1.69241e+06	2.98645e+06	NA	1.17045e+06	NA	NA	819941	NA
Q4VGL6	Q4VGL6	Roquin-1 (Roquin) (EC 2.3.2.27) (Protein Sanroque) (RING finger and C3H zinc finger protein 1) (RING finger and CCCH-type zinc finger domain-containing protein 1)	Rc3h1	NA	NA	NA	NA	NA	NA	NA	NA	NA	NA	NA	NA
Q501J6	Q501J6	Probable ATP-dependent RNA helicase DDX17 (EC 3.6.4.13) (DEAD box protein 17)	Ddx17	NA	330816	124123	475611	2.02969e+07	2.262e+07	1.38787e+07	1.50585e+07	2.72248e+07	7219421	2.7966e+07	2.23399e+07
Q501J7	Q501J7	Phosphatase and actin regulator 4 (Protein Humpty dumpty) (Humdy)	Phactr4	NA	NA	NA	NA	1.13098e+07	1.92188e+07	5.29355e+06	6.52863e+06	NA	NA	NA	NA
Q569Z5-1	Q569Z5	Probable ATP-dependent RNA helicase DDX46 (EC 3.6.4.13) (DEAD box protein 46)	Ddx46	NA	NA	NA	NA	870007	5083230	242004	1.4256e+06	NA	NA	NA	NA
Q569Z6	Q569Z6	Thyroid hormone receptor-associated protein 3 (Thyroid hormone receptor-associated protein complex 150 kDa component) (Trap150)	Thrap3	NA	NA	NA	NA	4.59557e+07	2.30813e+08	2.3813e+07	4.99832e+07	NA	NA	NA	NA
Q56A08	Q56A08	G-patch domain and KOW motifs-containing protein (Protein MOS2 homolog)	Gpkow	NA	NA	NA	NA	2743091	2.49459e+06	1.91164e+06	2.21601e+06	NA	NA	NA	NA
Q571G4-1	Q571G4	Protein lin-54 homolog	Lin54	NA	NA	NA	NA	2.21777e+07	2.19462e+07	1.81768e+07	1.92682e+07	292626	156635	401507	634825
Q571H0	Q571H0	Nucleolar pre-ribosomal-associated protein 1 (URB1 ribosome biogenesis 1 homolog)	Urb1	NA	NA	NA	NA	1.49599e+06	1.3027e+06	1.11626e+06	1.22274e+06	NA	NA	NA	NA
Q571I4	Q571I4	Inactive tyrosine-protein kinase PRAG1 (Notch activation complex kinase) (PEAK1-related kinase-activating pseudokinase 1) (Sugen kinase 223) (Tyrosine-protein kinase SgK223)	Prag1	NA	NA	NA	NA	7.28668e+06	1.2078e+07	3.82201e+06	6.83946e+06	597670	NA	NA	438389
Q58A65	Q58A65	C-Jun-amino-terminal kinase-interacting protein 4 (JIP-4) (JNK-interacting protein 4) (JNK-associated leucine-zipper protein) (JLP) (JNK/SAPK-associated protein 2) (JSAP2) (Mitogen-activated protein kinase 8-interacting protein 4) (Sperm-associated antigen 9)	Spag9	NA	NA	NA	NA	6.52549e+06	9.16562e+06	4.47682e+06	5.42221e+06	NA	NA	NA	NA
Q5DTT3	Q5DTT3	Protein TASOR 2 (Peripheral benzodiazepine receptor-associated protein 20)	Tasor2	NA	NA	NA	NA	2.48247e+07	4.01985e+07	1.33505e+07	1.81238e+07	NA	NA	NA	NA
Q5DTW7	Q5DTW7	Retroelement silencing factor 1	Resf1	NA	NA	NA	NA	NA	765465	718897	585595	NA	NA	NA	NA
Q5DTX6	Q5DTX6	Junctional cadherin 5-associated protein (Junctional protein associated with coronary artery disease) (JCAD)	Jcad	NA	NA	NA	183331	5.27773e+07	8.67334e+07	1.92458e+07	3.90265e+07	1.04905e+08	1.25556e+07	5.99692e+07	7.68226e+07
Q5DW34	Q5DW34	Histone-lysine N-methyltransferase EHMT1 (EC 2.1.1.-) (EC 2.1.1.367) (Euchromatic histone-lysine N-methyltransferase 1) (Eu-HMTase1) (G9a-like protein 1) (GLP) (GLP1) (Lysine N-methyltransferase 1D)	Ehmt1	97132.6	182717	NA	189407	5.58824e+06	8.63102e+06	5.13826e+06	7.11802e+06	NA	NA	NA	NA
Q5F285	Q5F285	Transmembrane protein 256	Tmem256	NA	NA	NA	NA	NA	NA	NA	NA	4.36567e+06	1.98669e+06	NA	2.4071e+06
Q5F2E7-1	Q5F2E7	FMR1-interacting protein NUFIP2 (82 kDa FMRP-interacting protein) (82-FIP) (FMRP-interacting protein 2)	Nufip2	35778.5	55756.1	NA	68643.6	1.27095e+08	1.85412e+08	8.82713e+07	9.36975e+07	2.05201e+06	795248	4.00944e+06	1.62837e+06
Q5FWH6-1	Q5FWH6	Rho guanine nucleotide exchange factor 15 (Ephexin-5) (E5)	Arhgef15	NA	NA	NA	NA	1.94718e+07	3.11687e+07	8.42004e+06	9.69861e+06	6.81326e+06	1.14399e+06	1.08233e+07	1.03925e+07
Q5H8C4	Q5H8C4	Intermembrane lipid transfer protein VPS13A (Chorea-acanthocytosis protein homolog) (Chorein) (Vacuolar protein sorting-associated protein 13A)	Vps13a	NA	NA	NA	NA	NA	7075898	3.15772e+06	2395135	NA	NA	NA	NA
Q5HZG4	Q5HZG4	Transcription initiation factor TFIID subunit 3 (140 kDa TATA box-binding protein-associated factor) (TBP-associated factor 3) (Transcription initiation factor TFIID 140 kDa subunit) (TAF(II)140) (TAF140) (TAFII-140) (TAFII140)	Taf3	NA	NA	NA	NA	9.79548e+06	1.04626e+07	4.69334e+06	6.56427e+06	NA	NA	NA	NA
Q5I1X5	Q5I1X5	RelA-associated inhibitor (Inhibitor of ASPP protein) (Protein iASPP) (NFkB-interacting protein 1) (PPP1R13B-like protein)	Ppp1r13l	NA	NA	NA	NA	956593	921533	577294	673814	1.19884e+07	NA	5.81196e+06	6.19396e+06
Q5M956-2	Q5M956	BTB/POZ domain-containing protein KCTD1	Kctd1	NA	NA	NA	NA	NA	NA	NA	NA	4278210	NA	1084139	1.70616e+06
Q5NBU8	Q5NBU8	XIAP-associated factor 1 (BIRC4-binding protein)	Xaf1	NA	NA	NA	NA	1.66292e+06	2.94845e+06	888926	1.64191e+06	5.38022e+06	3356325	2.66116e+06	3068224
Q5NBX1	Q5NBX1	Protein cordon-bleu	Cobl	NA	NA	NA	NA	NA	NA	NA	NA	3.9633e+06	212233	3.35328e+06	2.50958e+06
Q5NBX1-2	Q5NBX1	Protein cordon-bleu	Cobl	NA	NA	NA	NA	8.17866e+07	1.4248e+08	3.79089e+07	4.88982e+07	NA	NA	NA	NA
Q5NC05	Q5NC05	Transcription termination factor 2 (EC 3.6.4.-) (RNA polymerase II termination factor) (Transcription release factor 2)	Ttf2	NA	NA	NA	NA	2.86357e+06	3.60011e+06	2.02183e+06	3.1745e+06	2.52924e+06	637820	4.12534e+06	2.21611e+06
Q5NCR9	Q5NCR9	Nuclear speckle splicing regulatory protein 1 (Coiled-coil domain-containing protein 55) (Nuclear speckle-related protein 70) (NSrp70)	Nsrp1	NA	NA	NA	NA	5394325	7.62542e+06	2.02857e+06	2.87881e+06	NA	NA	NA	NA
Q5ND28	Q5ND28	Scavenger receptor class F member 1 (Acetyl LDL receptor) (Scavenger receptor expressed by endothelial cells 1 protein) (SREC-I)	Scarf1	NA	NA	NA	NA	323203	2.19859e+06	294466	504618	NA	NA	NA	NA
Q5ND52	Q5ND52	rRNA methyltransferase 3, mitochondrial (EC 2.1.1.-) (16S rRNA (guanosine(1370)-2'-O)-methyltransferase) (16S rRNA [Gm1370] 2'-O-methyltransferase) (RNA methyltransferase-like protein 1)	Mrm3	NA	NA	NA	NA	NA	NA	NA	NA	NA	NA	NA	NA
Q5PR69-1	Q5PR69	Capping protein-inhibiting regulator of actin dynamics	Cracd	NA	NA	NA	NA	NA	NA	NA	NA	NA	NA	NA	NA
Q5PSV9	Q5PSV9	Mediator of DNA damage checkpoint protein 1	Mdc1	NA	NA	NA	NA	3.04597e+07	4.6725e+07	1.06301e+07	1.52748e+07	NA	NA	NA	NA
Q5QNQ9	Q5QNQ9	Collagen alpha-1(XXVII) chain	Col27a1	NA	NA	NA	NA	64627520	46157361	31312106	46135188	NA	NA	NA	NA
Q5RJG1	Q5RJG1	Nucleolar protein 10	Nol10	NA	NA	NA	NA	1.6606e+06	8.9397e+06	561757	1.32552e+06	NA	NA	NA	NA
Q5SF07	Q5SF07	Insulin-like growth factor 2 mRNA-binding protein 2 (IGF2 mRNA-binding protein 2) (IMP-2) (IGF-II mRNA-binding protein 2) (VICKZ family member 2)	Igf2bp2	NA	NA	NA	NA	1.35904e+07	1.33078e+07	7.89861e+06	9719405	NA	NA	NA	NA
Q5SFM8	Q5SFM8	RNA-binding protein 27 (Peri-implantation stem cell protein 1) (RNA-binding motif protein 27)	Rbm27	NA	NA	NA	NA	3.43799e+07	2.73141e+07	1.59275e+07	2.21905e+07	1.6088e+07	3.83199e+06	1.31992e+07	1.29064e+07
Q5SNZ0	Q5SNZ0	Girdin (Akt phosphorylation enhancer) (APE) (Coiled-coil domain-containing protein 88A) (G alpha-interacting vesicle-associated protein) (GIV) (Girders of actin filament) (Hook-related protein 1) (HkRP1)	Ccdc88a	NA	NA	NA	NA	NA	NA	NA	NA	810760	NA	NA	310714
Q5SRY7-1	Q5SRY7	F-box/WD repeat-containing protein 11 (F-box and WD repeats protein beta-TrCP2) (F-box/WD repeat-containing protein 1B) (Homologous to Slimb protein) (HOS)	Fbxw11	NA	NA	NA	NA	NA	NA	NA	NA	2.89941e+06	179781	7.60393e+06	1.90458e+06
Q5SSI6	Q5SSI6	U3 small nucleolar RNA-associated protein 18 homolog (WD repeat-containing protein 50)	Utp18	NA	NA	NA	NA	720827	1.0204e+06	576118	629504	NA	NA	NA	NA
Q5SSZ5-1	Q5SSZ5	Tensin-3 (EC 3.1.3.-) (Tensin-like SH2 domain-containing protein 1)	Tns3	NA	NA	NA	NA	NA	NA	NA	NA	1.45435e+06	NA	734588	190725
Q5SU73	Q5SU73	Coilin (p80-coilin)	Coil	NA	NA	NA	NA	1.9132e+07	48761320	1.20585e+07	1.18918e+07	NA	NA	NA	NA
Q5SUE8-1	Q5SUE8	Ankyrin repeat domain-containing protein 40	Ankrd40	NA	NA	NA	NA	4865585	7.34811e+06	3.64891e+06	4.82221e+06	NA	NA	NA	NA
Q5SUF2-1	Q5SUF2	Luc7-like protein 3 (Cisplatin resistance-associated-overexpressed protein)	Luc7l3	NA	NA	NA	NA	NA	NA	NA	NA	798246	164088	NA	NA
Q5SUQ9-1	Q5SUQ9	CST complex subunit CTC1 (Alpha-accessory factor of 132 kDa) (AAF-132) (AAF132) (Conserved telomere maintenance component 1)	Ctc1	NA	NA	NA	NA	NA	NA	NA	NA	396619	NA	NA	183858
Q5SV85	Q5SV85	Synergin gamma (AP1 subunit gamma-binding protein 1) (Gamma-synergin)	Synrg	NA	NA	NA	NA	2.70116e+06	4.25396e+06	2.2044e+06	2.90381e+06	NA	NA	NA	NA
Q5SW75-1	Q5SW75	Protein phosphatase Slingshot homolog 2 (EC 3.1.3.16) (EC 3.1.3.48) (SSH-like protein 2) (SSH-2L) (mSSH-2L)	Ssh2	NA	NA	NA	NA	NA	474255	117870	192658	NA	NA	NA	NA
Q5SWU9-1	Q5SWU9	Acetyl-CoA carboxylase 1 (ACC1) (EC 6.4.1.2) (ACC-alpha) (Acetyl-CoA carboxylase 265)	Acaca	4.66445e+07	1.07957e+08	7.64653e+07	1.27104e+08	1.21794e+08	2.41955e+08	1.44994e+08	1.72586e+08	1.71681e+08	5.83696e+07	5.2847e+08	1.997e+08
Q5SXY1-1	Q5SXY1	Cytospin-B (Sperm antigen with calponin homology and coiled-coil domains 1)	Specc1	NA	NA	NA	NA	8.17007e+06	1.27314e+07	1.20318e+06	3.01861e+06	645891	NA	NA	432172
Q5SYD0	Q5SYD0	Unconventional myosin-Id	Myo1d	NA	NA	NA	NA	NA	NA	NA	NA	NA	483052	698500	NA
Q5U4C3	Q5U4C3	Splicing factor, arginine/serine-rich 19 (SR-related and CTD-associated factor 1)	Scaf1	NA	NA	NA	NA	555046	1.39424e+06	NA	415359	NA	NA	NA	NA
Q5U5Q9	Q5U5Q9	BRCA1-A complex subunit RAP80 (Receptor-associated protein 80) (Ubiquitin interaction motif-containing protein 1)	Uimc1	NA	NA	NA	NA	7.45316e+06	8.7266e+06	6.09753e+06	6.28318e+06	NA	NA	NA	NA
Q5XFZ0	Q5XFZ0	UPF0711 protein C18orf21 homolog		NA	NA	NA	NA	NA	NA	NA	NA	NA	NA	NA	NA
Q5XG71	Q5XG71	Small subunit processome component 20 homolog (Down-regulated in metastasis protein)	Utp20	NA	NA	NA	NA	472036	728161	149892	411504	NA	NA	NA	NA
Q5XG73-2	Q5XG73	Acyl-CoA-binding domain-containing protein 5	Acbd5	NA	NA	NA	NA	6.73787e+07	7.62932e+07	4.03074e+07	4.86363e+07	NA	NA	NA	NA
Q5XG73-3	Q5XG73	Acyl-CoA-binding domain-containing protein 5	Acbd5	NA	NA	NA	NA	1.11673e+07	1.15167e+07	6.48143e+06	6.92067e+06	NA	NA	NA	NA
Q5XJV6	Q5XJV6	Serine/threonine-protein kinase LMTK3 (EC 2.7.11.1) (Apoptosis-associated tyrosine kinase 3) (Lemur tyrosine kinase 3)	Lmtk3	NA	NA	NA	NA	NA	NA	NA	NA	NA	NA	NA	NA
Q5XJY5	Q5XJY5	Coatomer subunit delta (Archain) (Delta-coat protein) (Delta-COP)	Arcn1	NA	NA	NA	NA	3.4004e+06	5.39832e+06	806535	1.84169e+06	NA	NA	NA	NA
Q60520-1	Q60520	Paired amphipathic helix protein Sin3a (Histone deacetylase complex subunit Sin3a) (Transcriptional corepressor Sin3a)	Sin3a	94002.8	NA	80956.2	97804.6	1.38788e+06	1.27677e+06	NA	1.18842e+06	NA	NA	NA	NA
Q60575-3	Q60575	Kinesin-like protein KIF1B	Kif1b	NA	NA	NA	NA	3.53712e+06	3.26137e+06	2.11642e+06	2.29615e+06	NA	NA	NA	NA
Q60596	Q60596	DNA repair protein XRCC1 (X-ray repair cross-complementing protein 1)	Xrcc1	NA	NA	NA	NA	765359	1.16023e+06	475878	801789	NA	NA	NA	NA
Q60597	Q60597	2-oxoglutarate dehydrogenase complex component E1 (E1o) (OGDC-E1) (OGDH-E1) (EC 1.2.4.2) (2-oxoglutarate dehydrogenase, mitochondrial) (Alpha-ketoglutarate dehydrogenase) (Alpha-KGDH-E1) (Thiamine diphosphate (ThDP)-dependent 2-oxoglutarate dehydrogenase)	Ogdh	NA	NA	NA	NA	908532	783271	NA	NA	NA	NA	NA	NA
Q60598	Q60598	Src substrate cortactin	Cttn	NA	NA	NA	NA	9.8774e+08	1.12967e+09	5.54181e+08	6.91237e+08	5.27725e+09	2.12186e+09	3.76718e+09	2.51269e+09
Q60605	Q60605	Myosin light polypeptide 6 (17 kDa myosin light chain) (LC17) (Myosin light chain 3) (MLC-3) (Myosin light chain alkali 3) (Myosin light chain A3) (Smooth muscle and nonmuscle myosin light chain alkali 6)	Myl6	NA	NA	NA	NA	6.29946e+06	8.43257e+06	9.11531e+06	8.62292e+06	508519	NA	9.97281e+06	1.66028e+06
Q60631	Q60631	Growth factor receptor-bound protein 2 (Adapter protein GRB2) (SH2/SH3 adapter GRB2)	Grb2	NA	NA	NA	NA	NA	NA	NA	NA	232928	797676	8.36855e+06	2.18259e+06
Q60668-1	Q60668	Heterogeneous nuclear ribonucleoprotein D0 (hnRNP D0) (AU-rich element RNA-binding protein 1)	Hnrnpd	NA	NA	NA	NA	5.43265e+06	4.78038e+06	2.56308e+06	2.73665e+06	762414	NA	3.87877e+06	1.50166e+06
Q60738	Q60738	Proton-coupled zinc antiporter SLC30A1 (Solute carrier family 30 member 1) (Zinc transporter 1) (ZnT-1)	Slc30a1	NA	NA	NA	NA	4586226	4.77689e+06	2.80139e+06	2333256	NA	NA	NA	NA
Q60749	Q60749	KH domain-containing, RNA-binding, signal transduction-associated protein 1 (GAP-associated tyrosine phosphoprotein p62) (Src-associated in mitosis 68 kDa protein) (Sam68) (p21 Ras GTPase-activating protein-associated p62) (p68)	Khdrbs1	NA	NA	NA	NA	4.52521e+07	4.51728e+07	2.81856e+07	3.35967e+07	1.99812e+07	194767	1.21369e+07	1.2958e+07
Q60760	Q60760	Growth factor receptor-bound protein 10 (GRB10 adapter protein) (Maternally expressed gene 1 protein)	Grb10	NA	NA	NA	NA	594136	1.17453e+06	310860	421389	643034	219841	NA	NA
Q60766	Q60766	Immunity-related GTPase family M protein 1 (EC 3.6.5.-) (Interferon-inducible GTPase 3) (Interferon-inducible protein 1) (LPS-stimulated RAW 264.7 macrophage protein 47) (LRG-47)	Irgm1	NA	4.87129e+06	3.06884e+06	5.038e+06	2.7374e+07	3.31741e+07	1.48419e+07	2.44266e+07	2.33617e+07	8.04552e+06	7.59774e+07	2.17295e+07
Q60790	Q60790	Ras GTPase-activating protein 3 (GAP1(IP4BP)) (GapIII) (Ins P4-binding protein)	Rasa3	NA	NA	NA	NA	NA	NA	NA	NA	670602	494037	836646	695685
Q60838	Q60838	Segment polarity protein dishevelled homolog DVL-2 (Dishevelled-2) (DSH homolog 2)	Dvl2	NA	NA	NA	NA	733784	105729	807153	1.39584e+06	2.11966e+06	291472	2.0953e+06	5.39746e+06
Q60847	Q60847	Collagen alpha-1(XII) chain	Col12a1	NA	NA	NA	NA	335189	566155	256522	302898	NA	NA	NA	NA
Q60854	Q60854	Serpin B6 (Placental thrombin inhibitor) (Proteinase inhibitor 6) (PI-6)	Serpinb6	NA	NA	NA	NA	NA	NA	NA	NA	NA	NA	NA	NA
Q60855	Q60855	Receptor-interacting serine/threonine-protein kinase 1 (EC 2.7.11.1) (Cell death protein RIP) (Receptor-interacting protein 1) (RIP-1)	Ripk1	NA	NA	NA	NA	NA	NA	NA	NA	3.56354e+06	NA	620784	NA
Q60862	Q60862	Origin recognition complex subunit 2	Orc2	NA	NA	NA	NA	2.11153e+06	2.13802e+06	1.37878e+06	1.54225e+06	NA	NA	NA	NA
Q60864	Q60864	Stress-induced-phosphoprotein 1 (STI1) (mSTI1) (Hsc70/Hsp90-organizing protein) (Hop)	Stip1	NA	NA	NA	NA	NA	NA	1.44885e+06	NA	NA	NA	1346099	NA
Q60865	Q60865	Caprin-1 (Cytoplasmic activation- and proliferation-associated protein 1) (GPI-anchored membrane protein 1) (GPI-anchored protein p137) (GPI-p137) (p137GPI) (Membrane component chromosome 11 surface marker 1) (RNA granule protein 105)	Caprin1	NA	NA	NA	NA	1.04401e+07	9.72437e+06	4.8033e+06	7.63317e+06	NA	447381	6.60236e+06	3299689
Q60875	Q60875	Rho guanine nucleotide exchange factor 2 (Guanine nucleotide exchange factor H1) (GEF-H1) (LBC'S first cousin) (Lymphoid blast crisis-like 1) (Oncogene LFC) (Rhobin)	Arhgef2	NA	NA	NA	NA	NA	348192	780091	915014	NA	573083	NA	630711
Q60899	Q60899	ELAV-like protein 2 (ELAV-like neuronal protein 1) (Hu-antigen B) (HuB) (Nervous system-specific RNA-binding protein Mel-N1)	Elavl2	NA	NA	NA	NA	NA	NA	NA	NA	NA	NA	NA	NA
Q60902-1	Q60902	Epidermal growth factor receptor substrate 15-like 1 (Epidermal growth factor receptor pathway substrate 15-related sequence) (Eps15-rs) (Eps15-related protein) (Eps15R)	Eps15l1	NA	NA	NA	NA	1.27904e+07	2.48244e+07	6.46719e+06	8.3986e+06	71351134	1.56408e+07	1.29909e+08	4.29781e+07
Q60902-4	Q60902	Epidermal growth factor receptor substrate 15-like 1 (Epidermal growth factor receptor pathway substrate 15-related sequence) (Eps15-rs) (Eps15-related protein) (Eps15R)	Eps15l1	NA	NA	NA	NA	NA	NA	NA	NA	1.05445e+06	397202	NA	408062
Q60930	Q60930	Voltage-dependent anion-selective channel protein 2 (VDAC-2) (mVDAC2) (Outer mitochondrial membrane protein porin 2) (Voltage-dependent anion-selective channel protein 6) (VDAC-6) (mVDAC6)	Vdac2	1.37832e+07	2.80444e+07	2.59225e+07	3.15955e+07	8.2502e+07	1.11816e+08	6.42587e+07	8.86569e+07	6.7997e+07	3.08771e+07	1.89618e+08	68123409
Q60931	Q60931	Voltage-dependent anion-selective channel protein 3 (VDAC-3) (mVDAC3) (Outer mitochondrial membrane protein porin 3)	Vdac3	2.65608e+06	3.65224e+06	3.76398e+06	4.18413e+06	1.36603e+07	2.5926e+07	1.14573e+07	2.45766e+07	1.60974e+07	7.46129e+06	8.69505e+07	2.30754e+07
Q60932-1	Q60932	Voltage-dependent anion-selective channel protein 1 (VDAC-1) (mVDAC1) (Outer mitochondrial membrane protein porin 1) (Plasmalemmal porin) (Voltage-dependent anion-selective channel protein 5) (VDAC-5) (mVDAC5)	Vdac1	NA	NA	NA	NA	306561	851030	547678	687796	2.41787e+06	NA	2.572e+07	2.49934e+06
Q60953-1	Q60953	Protein PML	Pml	NA	NA	NA	NA	1.17506e+07	3.50538e+07	2.8109e+06	4.11974e+07	NA	NA	2.40797e+06	589492
Q60960	Q60960	Importin subunit alpha-5 (Importin alpha-S1) (Karyopherin subunit alpha-1) (Nucleoprotein interactor 1) (NPI-1) (RAG cohort protein 2) (SRP1-beta)	Kpna1	NA	NA	NA	NA	NA	NA	NA	NA	NA	NA	NA	NA
Q60973	Q60973	Histone-binding protein RBBP7 (Histone acetyltransferase type B subunit 2) (Nucleosome-remodeling factor subunit RBAP46) (Retinoblastoma-binding protein 7) (RBBP-7) (Retinoblastoma-binding protein p46)	Rbbp7	NA	NA	NA	NA	2.19958e+07	4.03849e+07	1.09142e+07	2.03305e+07	5.23954e+06	NA	7.92727e+06	7.17629e+06
Q60974-1	Q60974	Nuclear receptor corepressor 1 (N-CoR) (N-CoR1) (Retinoid X receptor-interacting protein 13) (RIP13)	Ncor1	NA	NA	NA	NA	2.35948e+06	1.52897e+06	886928	834073	NA	NA	NA	NA
Q61029	Q61029	Lamina-associated polypeptide 2, isoforms beta/delta/epsilon/gamma (Thymopoietin isoforms beta/delta/epsilon/gamma) (TP beta/delta/epsilon/gamma)	Tmpo	NA	NA	NA	NA	1.59835e+08	1.74926e+08	9.82655e+07	1.15939e+08	7.45765e+06	2.43415e+06	2.65587e+07	1.27133e+07
Q61029-3	Q61029	Lamina-associated polypeptide 2, isoforms beta/delta/epsilon/gamma (Thymopoietin isoforms beta/delta/epsilon/gamma) (TP beta/delta/epsilon/gamma)	Tmpo	NA	NA	NA	NA	342077	329244	NA	NA	NA	NA	NA	NA
Q61033-1	Q61033	Lamina-associated polypeptide 2, isoforms alpha/zeta (Thymopoietin isoforms alpha/zeta) (TP alpha/zeta)	Tmpo	NA	NA	NA	NA	1.85168e+08	2.38133e+08	1.1409e+08	1.56819e+08	2.15724e+06	92126	2.55365e+06	2.49301e+06
Q61036	Q61036	Serine/threonine-protein kinase PAK 3 (EC 2.7.11.1) (Beta-PAK) (CDC42/RAC effector kinase PAK-B) (p21-activated kinase 3) (PAK-3)	Pak3	NA	NA	NA	NA	2328563	4.01086e+06	2.10175e+06	1.06259e+06	NA	NA	NA	NA
Q61062	Q61062	Segment polarity protein dishevelled homolog DVL-3 (Dishevelled-3) (DSH homolog 3)	Dvl3	NA	NA	NA	NA	1.10606e+07	2.02162e+07	3.88332e+06	9.82679e+06	6.17473e+06	NA	1.17067e+07	2.41234e+06
Q61074	Q61074	Protein phosphatase 1G (EC 3.1.3.16) (Fibroblast growth factor-inducible protein 13) (FIN13) (Protein phosphatase 1C) (Protein phosphatase 2C isoform gamma) (PP2C-gamma) (Protein phosphatase magnesium-dependent 1 gamma)	Ppm1g	NA	NA	NA	NA	8.85783e+06	6.28298e+06	4.377e+06	6.47534e+06	NA	NA	NA	NA
Q61081	Q61081	Hsp90 co-chaperone Cdc37 (Hsp90 chaperone protein kinase-targeting subunit) (p50Cdc37) [Cleaved into: Hsp90 co-chaperone Cdc37, N-terminally processed]	Cdc37	NA	NA	NA	NA	2.54356e+06	2.48974e+06	1.3678e+06	1.58364e+06	9.10527e+06	1.29832e+06	3.15975e+06	5.23242e+06
Q61103	Q61103	Zinc finger protein ubi-d4 (Apoptosis response zinc finger protein) (BRG1-associated factor 45D) (BAF45D) (D4, zinc and double PHD fingers family 2) (Protein requiem)	Dpf2	NA	NA	NA	NA	770822	609725	653494	549020	NA	NA	NA	NA
Q61107	Q61107	Guanylate-binding protein 3 (EC 3.6.5.-) (GTP-binding protein 3) (GBP-3) (Guanine nucleotide-binding protein 3)	Gbp3	NA	NA	NA	NA	464555	849911	NA	805827	NA	NA	NA	NA
Q61136	Q61136	Serine/threonine-protein kinase PRP4 homolog (EC 2.7.11.1) (PRP4 pre-mRNA-processing factor 4 homolog) (Pre-mRNA protein kinase)	Prpf4b	NA	NA	NA	NA	2.15097e+06	5.91856e+06	NA	NA	NA	NA	NA	NA
Q61140-1	Q61140	Breast cancer anti-estrogen resistance protein 1 (CRK-associated substrate) (p130cas)	Bcar1	NA	NA	NA	NA	3.76381e+07	5.67121e+07	2.44309e+07	3.87426e+07	2.34151e+06	NA	3885687	1.07607e+06
Q61140-2	Q61140	Breast cancer anti-estrogen resistance protein 1 (CRK-associated substrate) (p130cas)	Bcar1	NA	NA	NA	NA	NA	NA	NA	NA	2.20953e+08	5.65893e+07	1.89892e+08	8.74978e+07
Q61161	Q61161	Mitogen-activated protein kinase kinase kinase kinase 2 (EC 2.7.11.1) (Germinal center kinase) (GCK) (MAPK/ERK kinase kinase kinase 2) (MEK kinase kinase 2) (MEKKK 2) (Rab8-interacting protein)	Map4k2	NA	NA	NA	NA	2.38692e+06	3.54657e+06	1.98018e+06	2.27244e+06	915188	271033	2.06511e+06	1.40466e+06
Q61164	Q61164	Transcriptional repressor CTCF (11-zinc finger protein) (CCCTC-binding factor) (CTCFL paralog)	Ctcf	NA	NA	NA	NA	2.3824e+07	2.34593e+07	1.1066e+07	1.51564e+07	NA	NA	NA	NA
Q61166	Q61166	Microtubule-associated protein RP/EB family member 1 (APC-binding protein EB1) (End-binding protein 1) (EB1)	Mapre1	NA	NA	NA	NA	NA	NA	NA	NA	1780698	NA	716045	756359
Q61171	Q61171	Peroxiredoxin-2 (EC 1.11.1.24) (Thiol-specific antioxidant protein) (TSA) (Thioredoxin peroxidase 1) (Thioredoxin-dependent peroxide reductase 1) (Thioredoxin-dependent peroxiredoxin 2)	Prdx2	1.28789e+06	NA	NA	NA	10544753	16211069	8.97411e+06	8134612	9.30604e+06	3.55923e+06	1.8777e+07	5.53821e+06
Q61176	Q61176	Arginase-1 (EC 3.5.3.1) (Liver-type arginase) (Type I arginase)	Arg1	NA	NA	NA	NA	NA	NA	NA	NA	NA	NA	2887749	NA
Q61187	Q61187	Tumor susceptibility gene 101 protein (ESCRT-I complex subunit TSG101)	Tsg101	NA	NA	NA	NA	NA	NA	NA	NA	NA	NA	1.56203e+06	408331
Q61191	Q61191	Host cell factor 1 (HCF) (HCF-1) (C1 factor) [Cleaved into: HCF N-terminal chain 1; HCF N-terminal chain 2; HCF N-terminal chain 3; HCF N-terminal chain 4; HCF N-terminal chain 5; HCF N-terminal chain 6; HCF C-terminal chain 1; HCF C-terminal chain 2; HCF C-terminal chain 3; HCF C-terminal chain 4; HCF C-terminal chain 5; HCF C-terminal chain 6]	Hcfc1	NA	NA	NA	NA	3.12276e+08	2.72443e+08	2.1326e+08	2.63449e+08	4.08858e+06	550159	7.0719e+06	3.7901e+06
Q61194-1	Q61194	Phosphatidylinositol 4-phosphate 3-kinase C2 domain-containing subunit alpha (PI3K-C2-alpha) (PtdIns-3-kinase C2 subunit alpha) (EC 2.7.1.137) (EC 2.7.1.153) (EC 2.7.1.154) (Cpk-m) (Phosphoinositide 3-kinase-C2-alpha) (p170)	Pik3c2a	NA	NA	NA	NA	1.21149e+08	1.68114e+08	5.83767e+07	94945257	2.83999e+07	5.04996e+06	3.88025e+07	1.92227e+07
Q61216-1	Q61216	Double-strand break repair protein MRE11 (EC 3.1.-.-) (Double-strand break repair protein MRE11A) (MmMRE11A) (Meiotic recombination 11 homolog 1) (MRE11 homolog 1) (Meiotic recombination 11 homolog A) (MRE11 homolog A)	Mre11	NA	NA	NA	NA	1.18603e+06	377680	786132	NA	NA	NA	NA	NA
Q61235	Q61235	Beta-2-syntrophin (59 kDa dystrophin-associated protein A1 basic component 2) (Syntrophin-3) (SNT3) (Syntrophin-like) (SNTL)	Sntb2	NA	NA	NA	NA	138043	528857	218727	340239	397973	NA	164889	398878
Q61249	Q61249	Immunoglobulin-binding protein 1 (Alpha4 phosphoprotein) (CD79a-binding protein 1) (Lymphocyte signal transduction molecule alpha 4) (Protein phosphatase 2/4/6 regulatory subunit) (p52)	Igbp1	NA	NA	NA	NA	NA	NA	NA	NA	2.86056e+06	678898	3.40692e+06	3.17338e+06
Q61263	Q61263	Sterol O-acyltransferase 1 (EC 2.3.1.26) (Acyl-coenzyme A:cholesterol acyltransferase 1) (ACAT-1) (Cholesterol acyltransferase 1)	Soat1	NA	NA	NA	NA	NA	NA	NA	NA	NA	NA	NA	NA
Q61288	Q61288	Serine/threonine-protein kinase receptor R3 (SKR3) (EC 2.7.11.30) (Activin receptor-like kinase 1) (ALK-1) (TGF-B superfamily receptor type I) (TSR-I)	Acvrl1	NA	NA	NA	NA	443764	679825	298488	386495	681159	493027	1.37024e+06	744133
Q61316	Q61316	Heat shock 70 kDa protein 4 (Heat shock 70-related protein APG-2)	Hspa4	NA	NA	NA	NA	NA	NA	NA	1.40948e+06	246047	NA	1.89635e+06	277810
Q61411-1	Q61411	GTPase HRas (EC 3.6.5.2) (H-Ras-1) (Transforming protein p21) (c-H-ras) (p21ras) [Cleaved into: GTPase HRas, N-terminally processed]	Hras	NA	NA	NA	NA	NA	NA	NA	NA	2.9729e+06	1.90823e+06	1.56635e+07	2.79592e+06
Q61414	Q61414	Keratin, type I cytoskeletal 15 (Cytokeratin-15) (CK-15) (Keratin-15) (K15)	Krt15	NA	1.772e+06	3.45816e+06	4.55143e+06	1.87144e+06	6.91449e+06	10332923	1.94138e+06	NA	NA	NA	NA
Q61464	Q61464	Zinc finger protein 638 (Nuclear protein 220) (Zinc finger matrin-like protein)	Znf638	NA	NA	NA	NA	2.12265e+08	2.29918e+08	1.32938e+08	1.57505e+08	636251	111094	193944	1.77721e+06
Q61473-1	Q61473	Transcription factor SOX-17	Sox17	NA	NA	NA	NA	255847	NA	180486	382393	131315	NA	83531.7	316299
Q61495	Q61495	Desmoglein-1-alpha (Desmoglein-1) (Dsg1-alpha) (DG1) (DGI) (Desmosomal glycoprotein I)	Dsg1a	NA	NA	NA	NA	NA	NA	NA	NA	343817	401618	1.26387e+06	2.03723e+06
Q61532	Q61532	Mitogen-activated protein kinase 6 (MAP kinase 6) (MAPK 6) (EC 2.7.11.24) (Extracellular signal-regulated kinase 3) (ERK-3)	Mapk6	NA	NA	NA	NA	NA	NA	NA	NA	1.51305e+06	NA	NA	333931
Q61550	Q61550	Double-strand-break repair protein rad21 homolog (mHR21) (Pokeweed agglutinin-binding protein 29) (PW29) (SCC1 homolog) [Cleaved into: 64-kDa C-terminal product (64-kDa carboxy-terminal product)]	Rad21	NA	NA	NA	NA	979250	NA	NA	943510	NA	NA	NA	NA
Q61553	Q61553	Fascin (Singed-like protein)	Fscn1	NA	NA	NA	NA	NA	NA	NA	NA	332664	53187.2	NA	NA
Q61574	Q61574	Forkhead box protein S1 (Forkhead-like 18 protein) (Forkhead-related transcription factor 10) (FREAC-10) (Transcription factor FKH-3)	Foxs1	NA	NA	NA	NA	1.32846e+06	1560312	3.34718e+06	2.93964e+06	NA	NA	NA	NA
Q61584	Q61584	RNA-binding protein FXR1 (FXR1P) (mFxr1p)	Fxr1	994825	1.29275e+06	1.12244e+06	NA	3.57375e+07	4.15729e+07	2.06348e+07	2.74455e+07	2.44012e+07	9.57037e+06	2.96651e+07	2.06808e+07
Q61595	Q61595	Kinectin	Ktn1	NA	NA	NA	NA	8.81251e+07	8.29569e+07	4.08865e+07	7.35093e+07	NA	NA	NA	NA
Q61595-5	Q61595	Kinectin	Ktn1	NA	NA	NA	NA	NA	NA	NA	NA	NA	NA	NA	NA
Q61624	Q61624	Zinc finger protein 148 (Beta enolase repressor factor 1) (G-rich box-binding protein) (Transcription factor BFCOL1) (Transcription factor ZBP-89) (Zinc finger DNA-binding protein 89)	Znf148	NA	NA	NA	NA	2.43537e+07	3.26042e+07	1.33258e+07	1.5908e+07	NA	NA	NA	NA
Q61656	Q61656	Probable ATP-dependent RNA helicase DDX5 (EC 3.6.4.13) (DEAD box RNA helicase DEAD1) (mDEAD1) (DEAD box protein 5) (RNA helicase p68)	Ddx5	2.87673e+06	15982218	1.16726e+07	1.34789e+07	115606155	1.23286e+08	7.68274e+07	9.53589e+07	1.95151e+08	1.87173e+08	3.6153e+08	2.13642e+08
Q61686	Q61686	Chromobox protein homolog 5 (Heterochromatin protein 1 homolog alpha) (HP1 alpha)	Cbx5	NA	NA	NA	NA	3.17626e+06	9.71497e+06	2.26395e+06	3.92796e+06	NA	NA	NA	NA
Q61687	Q61687	Transcriptional regulator ATRX (EC 3.6.4.12) (ATP-dependent helicase ATRX) (HP1 alpha-interacting protein) (HP1-BP38 protein) (Heterochromatin protein 2) (X-linked nuclear protein)	Atrx	NA	NA	NA	NA	2.8987e+06	2.45823e+06	2.17546e+06	1.23129e+06	NA	28974.8	NA	82857.5
Q61696	Q61696	Heat shock 70 kDa protein 1A (Heat shock 70 kDa protein 3) (HSP70.3) (Hsp68)	Hspa1a	NA	NA	NA	NA	1.62092e+06	1.05439e+06	1.084e+06	1.20896e+06	4249138	NA	1.17963e+07	4.95128e+06
Q61699	Q61699	Heat shock protein 105 kDa (42 degrees C-HSP) (Heat shock 110 kDa protein) (Heat shock-related 100 kDa protein E7I) (HSP-E7I)	Hsph1	104863	236301	163058	262864	7.39998e+06	1.8472e+07	5.08623e+06	6.0469e+06	3.75636e+06	NA	4.89316e+06	2.97411e+06
Q61735-1	Q61735	Leukocyte surface antigen CD47 (Integrin-associated protein) (IAP) (CD antigen CD47)	Cd47	NA	NA	NA	NA	NA	NA	NA	NA	376190	NA	952828	207147
Q61753	Q61753	D-3-phosphoglycerate dehydrogenase (3-PGDH) (EC 1.1.1.95) (A10)	Phgdh	1.2994e+06	3.29993e+06	2.84144e+06	2.14356e+06	3.59285e+07	6.39467e+07	2.56489e+07	2.99814e+07	3.81825e+07	1.14908e+07	2.11216e+07	1.6447e+07
Q61768	Q61768	Kinesin-1 heavy chain (Conventional kinesin heavy chain) (Ubiquitous kinesin heavy chain) (UKHC)	Kif5b	NA	NA	NA	NA	956898	1.70291e+06	153441	905566	NA	NA	NA	NA
Q61781	Q61781	Keratin, type I cytoskeletal 14 (Cytokeratin-14) (CK-14) (Keratin-14) (K14)	Krt14	1.08667e+06	NA	609004	NA	1.0086e+07	6.52807e+06	1.67793e+07	2.83792e+06	5.04502e+07	3.94928e+08	3.03898e+08	2.10697e+07
Q61792	Q61792	LIM and SH3 domain protein 1 (LASP-1) (Metastatic lymph node gene 50 protein) (MLN 50)	Lasp1	NA	NA	NA	NA	1.85748e+07	2.61918e+07	1.25745e+07	1.40283e+07	2.74931e+08	5.75946e+07	4.88386e+07	1.03024e+08
Q61818-1	Q61818	Retinoic acid-induced protein 1	Rai1	NA	NA	NA	NA	8.2819e+06	16313030	4.38915e+06	7428365	NA	NA	NA	NA
Q61827	Q61827	Transcription factor MafK (Erythroid transcription factor NF-E2 p18 subunit)	Mafk	NA	NA	NA	NA	NA	NA	NA	NA	NA	NA	NA	NA
Q61881	Q61881	DNA replication licensing factor MCM7 (EC 3.6.4.12) (CDC47 homolog)	Mcm7	NA	NA	NA	NA	NA	NA	NA	NA	2.25247e+06	NA	2.78788e+06	832695
Q61937	Q61937	Nucleophosmin (NPM) (Nucleolar phosphoprotein B23) (Nucleolar protein NO38) (Numatrin)	Npm1	326657	1.15144e+06	3.0144e+06	690294	5.17468e+08	5.7578e+08	3.41165e+08	4.37273e+08	3.04804e+07	2969910	8861622	1.69595e+07
Q61990	Q61990	Poly(rC)-binding protein 2 (Alpha-CP2) (CTBP) (CBP) (Putative heterogeneous nuclear ribonucleoprotein X) (hnRNP X)	Pcbp2	NA	6.20205e+06	4.47806e+06	5.85448e+06	14573086	1.60382e+07	7937324	9.3654e+06	2.01025e+07	6.93755e+06	8824102	1.48972e+07
Q62036	Q62036	Centrosomal protein of 131 kDa (5-azacytidine-induced protein 1) (Pre-acrosome localization protein 1)	Cep131	NA	NA	NA	NA	6.33346e+06	7.3843e+06	3.94366e+06	4.27926e+06	1.00467e+08	1.48907e+07	6.30649e+07	5.59415e+07
Q62073	Q62073	Mitogen-activated protein kinase kinase kinase 7 (EC 2.7.11.25) (Transforming growth factor-beta-activated kinase 1) (TGF-beta-activated kinase 1)	Map3k7	NA	NA	NA	NA	482249	436975	206269	290210	NA	NA	NA	NA
Q62093	Q62093	Serine/arginine-rich splicing factor 2 (Protein PR264) (Putative myelin regulatory factor 1) (MRF-1) (Splicing component, 35 kDa) (Splicing factor SC35) (SC-35) (Splicing factor, arginine/serine-rich 2)	Srsf2	NA	NA	NA	NA	NA	NA	NA	NA	1.4713e+06	NA	392640	226851
Q62095	Q62095	ATP-dependent RNA helicase DDX3Y (EC 3.6.4.13) (D1Pas1-related sequence 1) (DEAD box protein 3, Y-chromosomal) (DEAD-box RNA helicase DEAD2) (mDEAD2)	Ddx3y	497699	555052	428929	700459	2.15838e+06	3.11558e+06	2.08092e+06	2.93812e+06	2.83157e+06	118899	NA	4.17428e+06
Q62130	Q62130	Tyrosine-protein phosphatase non-receptor type 14 (EC 3.1.3.48) (Protein-tyrosine phosphatase PTP36)	Ptpn14	NA	NA	NA	NA	NA	NA	NA	NA	1.58588e+06	NA	7083632	1.54396e+06
Q62136	Q62136	Tyrosine-protein phosphatase non-receptor type 21 (EC 3.1.3.48) (Protein-tyrosine phosphatase PTP-RL10)	Ptpn21	NA	NA	NA	NA	NA	NA	NA	NA	450369	288622	266610	419621
Q62159	Q62159	Rho-related GTP-binding protein RhoC (Silica-induced gene 61 protein) (SIG-61)	Rhoc	NA	NA	NA	NA	NA	NA	NA	NA	2.96537e+06	NA	1.62874e+06	1.42028e+06
Q62167	Q62167	ATP-dependent RNA helicase DDX3X (EC 3.6.4.13) (D1Pas1-related sequence 2) (DEAD box RNA helicase DEAD3) (mDEAD3) (DEAD box protein 3, X-chromosomal) (Embryonic RNA helicase)	Ddx3x	NA	NA	NA	NA	2.92771e+08	3.13504e+08	1.83736e+08	2.31279e+08	6.52252e+08	3.62549e+08	6.26559e+08	4.81875e+08
Q62186	Q62186	Translocon-associated protein subunit delta (TRAP-delta) (Signal sequence receptor subunit delta) (SSR-delta)	Ssr4	NA	NA	NA	NA	NA	NA	NA	NA	NA	NA	2.71009e+06	NA
Q62187	Q62187	Transcription termination factor 1 (TTF-1) (RNA polymerase I termination factor) (Transcription termination factor I) (TTF-I) (mTFF-I)	Ttf1	NA	NA	NA	NA	NA	NA	NA	NA	NA	NA	NA	NA
Q62188	Q62188	Dihydropyrimidinase-related protein 3 (DRP-3) (Unc-33-like phosphoprotein 1) (ULIP-1)	Dpysl3	NA	NA	NA	NA	2.12251e+07	2.78602e+07	1.21604e+07	1.51395e+07	2.94021e+06	185448	1.73719e+06	1.76407e+06
Q62241	Q62241	U1 small nuclear ribonucleoprotein C (U1 snRNP C) (U1-C) (U1C)	Snrpc	NA	NA	NA	NA	411294	588916	416312	531581	548116	NA	18612.7	318151
Q62261-1	Q62261	Spectrin beta chain, non-erythrocytic 1 (Beta-II spectrin) (Embryonic liver fodrin) (Fodrin beta chain)	Sptbn1	NA	NA	NA	NA	3.42833e+07	4.44405e+07	1.09798e+07	1.8807e+07	2.30655e+06	881912	4430085	2.53801e+06
Q62311	Q62311	Transcription initiation factor TFIID subunit 6 (Transcription initiation factor TFIID 70 kDa subunit) (TAF(II)70) (TAFII-70) (TAFII70) (Transcription initiation factor TFIID 80 kDa subunit) (TAF(II)80) (TAFII-80) (TAFII80) (p80)	Taf6	NA	NA	NA	NA	6.60408e+07	6.44996e+07	1.2551e+07	1.86284e+07	NA	NA	NA	NA
Q62318	Q62318	Transcription intermediary factor 1-beta (TIF1-beta) (E3 SUMO-protein ligase TRIM28) (EC 2.3.2.27) (KRAB-A-interacting protein) (KRIP-1) (RING-type E3 ubiquitin transferase TIF1-beta) (Tripartite motif-containing protein 28)	Trim28	NA	NA	NA	NA	214646650	1.65024e+08	1.27016e+08	1.6062e+08	244715	97565.6	NA	735513
Q62351	Q62351	Transferrin receptor protein 1 (TR) (TfR) (TfR1) (Trfr) (CD antigen CD71)	Tfrc	NA	NA	NA	NA	862789	1.17004e+06	490416	599666	1.06257e+06	99126.7	4.69568e+06	556716
Q62415	Q62415	Apoptosis-stimulating of p53 protein 1 (Protein phosphatase 1 regulatory subunit 13B)	Ppp1r13b	NA	NA	NA	NA	NA	NA	NA	NA	428610	200929	NA	267342
Q62417-2	Q62417	Sorbin and SH3 domain-containing protein 1 (Ponsin) (SH3 domain protein 5) (SH3P12) (c-Cbl-associated protein) (CAP)	Sorbs1	NA	NA	NA	NA	2.66126e+08	4.30784e+08	1.17759e+08	1.66901e+08	1.12123e+09	2.49962e+08	5.42556e+08	4.35575e+08
Q62417-7	Q62417	Sorbin and SH3 domain-containing protein 1 (Ponsin) (SH3 domain protein 5) (SH3P12) (c-Cbl-associated protein) (CAP)	Sorbs1	NA	NA	NA	NA	8630979	8507334	NA	NA	NA	NA	NA	NA
Q62418-2	Q62418	Drebrin-like protein (Actin-binding protein 1) (SH3 domain-containing protein 7)	Dbnl	NA	NA	NA	NA	1.07136e+07	1.71822e+07	4.60691e+06	8.68394e+06	3.92351e+08	6.82194e+07	1.46026e+08	1.42056e+08
Q62419	Q62419	Endophilin-A2 (Endophilin-2) (SH3 domain protein 2B) (SH3 domain-containing GRB2-like protein 1) (SH3p8)	Sh3gl1	NA	NA	NA	NA	3.78947e+07	6.49187e+07	3.00328e+07	2.60803e+07	1.86578e+08	5.66297e+07	8.21825e+07	8.64887e+07
Q62426	Q62426	Cystatin-B (Stefin-B)	Cstb	NA	NA	NA	NA	NA	NA	NA	NA	NA	NA	1260806	NA
Q62448	Q62448	Eukaryotic translation initiation factor 4 gamma 2 (eIF-4-gamma 2) (eIF-4G 2) (eIF4G 2) (Novel APOBEC-1 target 1) (Translation repressor NAT1) (p97)	Eif4g2	NA	NA	NA	NA	3.82266e+07	4.05756e+07	1.94896e+07	2.93957e+07	1.92007e+07	2.6832e+06	4.15543e+07	1.51555e+07
Q62465	Q62465	Synaptic vesicle membrane protein VAT-1 homolog (EC 1.-.-.-)	Vat1	NA	NA	NA	NA	1809975	4.38999e+06	2.05197e+06	1.93078e+06	1040699	243380	NA	1.24115e+06
Q62481	Q62481	Vacuolar protein sorting-associated protein 72 homolog (Protein YL-1) (Transcription factor-like 1)	Vps72	NA	NA	NA	NA	1.01992e+06	1264137	949866	420149	NA	NA	NA	NA
Q62504	Q62504	Msx2-interacting protein (SMART/HDAC1-associated repressor protein) (SPEN homolog)	Spen	NA	NA	NA	NA	64198.5	507562	NA	150338	NA	NA	NA	NA
Q62523	Q62523	Zyxin	Zyx	NA	NA	NA	NA	1.96336e+07	2.88462e+07	1.32541e+07	1.47415e+07	1.6437e+07	3.84175e+06	9.32242e+06	9.18621e+06
Q63850	Q63850	Nuclear pore glycoprotein p62 (62 kDa nucleoporin) (Nucleoporin Nup62)	Nup62	NA	NA	NA	NA	1.17623e+07	1.52189e+07	9.06083e+06	1.34353e+07	NA	NA	NA	NA
Q63918	Q63918	Caveolae-associated protein 2 (Cavin-2) (Phosphatidylserine-binding protein) (Serum deprivation-response protein)	Cavin2	120254	219995	161426	159618	3223116	4.83028e+06	1.60622e+06	2.75952e+06	NA	NA	NA	NA
Q63943	Q63943	Myocyte-specific enhancer factor 2D	Mef2d	NA	NA	NA	NA	1.21743e+06	2.16004e+06	1.14019e+06	1.18325e+06	NA	NA	NA	NA
Q63961	Q63961	Endoglin (Cell surface MJ7/18 antigen) (CD antigen CD105)	Eng	NA	NA	NA	NA	NA	NA	NA	NA	NA	39924.1	946382	NA
Q64010-1	Q64010	Adapter molecule crk (Proto-oncogene c-Crk) (p38)	Crk	NA	NA	NA	NA	NA	NA	NA	NA	3992010	NA	324845	NA
Q64012	Q64012	RNA-binding protein Raly (Maternally-expressed hnRNP C-related protein) (hnRNP associated with lethal yellow protein)	Raly	NA	NA	NA	NA	1.76802e+07	2.12114e+07	1.26436e+07	1.59576e+07	NA	NA	2809405	NA
Q64092-1	Q64092	Transcription factor E3 (mTFE3)	Tfe3	NA	NA	NA	NA	4.65787e+06	3.63739e+06	1.78634e+06	3.1399e+06	1.36739e+06	794811	NA	1481294
Q640M1	Q640M1	U3 small nucleolar RNA-associated protein 14 homolog A (Juvenile spermatogonial depletion-like X-linked protein) (Jsd-like X-linked protein)	Utp14a	NA	NA	NA	NA	9.06126e+08	1.10436e+09	358037583	5.36333e+08	6.03378e+07	1.95744e+07	5.51355e+07	5.26739e+07
Q64133	Q64133	Amine oxidase [flavin-containing] A (EC 1.4.3.21) (EC 1.4.3.4) (Monoamine oxidase type A) (MAO-A)	Maoa	NA	NA	NA	NA	3.70679e+06	9.42992e+06	1.56611e+06	1.10134e+06	7.22337e+06	NA	1.3819e+07	1.18114e+06
Q64151	Q64151	Semaphorin-4C (M-Sema F) (Semaphorin-C-like 1) (Sema I) (Semaphorin I)	Sema4c	NA	NA	NA	NA	NA	NA	NA	NA	NA	NA	788856	NA
Q64152-1	Q64152	Transcription factor BTF3 (Nascent polypeptide-associated complex subunit beta) (NAC-beta) (RNA polymerase B transcription factor 3)	Btf3	NA	NA	NA	NA	NA	4058695	2650275	3783541	721982	NA	1.5657e+06	581814
Q64213	Q64213	Splicing factor 1 (CW17) (Mammalian branch point-binding protein) (BBP) (mBBP) (Transcription factor ZFM1) (mZFM) (Zinc finger gene in MEN1 locus) (Zinc finger protein 162)	Sf1	NA	NA	NA	NA	1.5441e+07	1.48734e+07	9.75339e+06	1.2759e+07	NA	NA	NA	NA
Q64282	Q64282	Interferon-induced protein with tetratricopeptide repeats 1 (IFIT-1) (Glucocorticoid-attenuated response gene 16 protein) (GARG-16) (Interferon-induced 56 kDa protein) (IFI-56K) (P56)	Ifit1	NA	NA	NA	NA	3.81671e+06	9663306	3.32175e+06	4.85261e+06	1.03824e+07	427004	3.87944e+07	1.05844e+07
Q64314	Q64314	Hematopoietic progenitor cell antigen CD34 (CD antigen CD34)	Cd34	NA	NA	NA	NA	NA	NA	NA	NA	NA	NA	NA	NA
Q64331	Q64331	Unconventional myosin-VI (Protein twist) (Unconventional myosin-6)	Myo6	NA	NA	NA	NA	4728244	3880366	3.08976e+06	3.78625e+06	NA	NA	NA	NA
Q64337	Q64337	Sequestosome-1 (STONE14) (Ubiquitin-binding protein p62)	Sqstm1	108202	2.25351e+06	681312	3.81689e+06	2.23798e+08	6.61877e+08	1.74769e+08	2.83527e+08	2.74967e+07	1.95672e+07	3.01832e+07	2.5519e+07
Q64339	Q64339	Ubiquitin-like protein ISG15 (Interferon-induced 15 kDa protein) (Interferon-induced 17 kDa protein) (IP17) (Ubiquitin cross-reactive protein)	Isg15	NA	3776136	2829434	4185248	9.15305e+06	1.24066e+07	1.00532e+07	1.25248e+07	31697094	21204780	55894300	21908230
Q64430	Q64430	Copper-transporting ATPase 1 (EC 7.2.2.8) (Copper pump 1) (Menkes disease-associated protein homolog)	Atp7a	NA	NA	NA	NA	1.00968e+06	823704	555242	695224	NA	NA	NA	NA
Q64433	Q64433	10 kDa heat shock protein, mitochondrial (Hsp10) (10 kDa chaperonin) (Chaperonin 10) (CPN10)	Hspe1	NA	297967	2.93602e+06	NA	4.22901e+06	1.01073e+07	5.17832e+06	5.69439e+06	2.80882e+06	766093	6.09727e+06	1.70285e+06
Q64442	Q64442	Sorbitol dehydrogenase (SDH) (SORD) (EC 1.1.1.-) (L-iditol 2-dehydrogenase) (EC 1.1.1.14) (Polyol dehydrogenase) (Xylitol dehydrogenase) (XDH) (EC 1.1.1.9)	Sord	NA	NA	NA	NA	NA	NA	NA	NA	165889	NA	1.31841e+06	NA
Q64475	Q64475	Histone H2B type 1-B (H2B-clustered histone 3) (h2B-143)	H2bc3	3.06752e+07	1.17457e+08	1.60254e+08	6.95722e+07	NA	NA	NA	NA	NA	NA	NA	NA
Q64478	Q64478	Histone H2B type 1-H (H2B-clustered histone 9) (h2B-221)	H2bc9	NA	NA	NA	NA	1.01455e+09	1.29032e+09	7.41643e+08	8.39268e+08	NA	NA	NA	NA
Q64511	Q64511	DNA topoisomerase 2-beta (EC 5.6.2.2) (DNA topoisomerase II, beta isozyme)	Top2b	NA	NA	NA	NA	8.62842e+06	12520615	3.30246e+06	7632522	939994	NA	1.17271e+06	1.12341e+06
Q64514-1	Q64514	Tripeptidyl-peptidase 2 (TPP-2) (EC 3.4.14.10) (Tripeptidyl aminopeptidase) (Tripeptidyl-peptidase II) (TPP-II)	Tpp2	NA	NA	NA	NA	NA	NA	NA	NA	246714	NA	1.79372e+06	NA
Q64521	Q64521	Glycerol-3-phosphate dehydrogenase, mitochondrial (GPD-M) (GPDH-M) (EC 1.1.5.3) (Protein TISP38)	Gpd2	NA	5.52457e+06	3.37279e+06	5.26125e+06	19531683	17992954	1.32148e+07	2.19202e+07	1.56492e+07	8.00172e+06	3.281e+07	2.37016e+07
Q64523	Q64523	Histone H2A type 2-C (H2A-clustered histone 20) (H2a-613B)	H2ac20	NA	3.44124e+06	7881783	1.59918e+06	6.77187e+08	9.37948e+08	5.00744e+08	5.66572e+08	27642777	2.67428e+07	67616104	34807368
Q64695	Q64695	Endothelial protein C receptor (Activated protein C receptor) (APC receptor) (Centrocyclin) (Centrosomal protein CCD41) (Endothelial cell protein C receptor) (CD antigen CD201)	Procr	NA	NA	NA	NA	NA	NA	NA	NA	NA	NA	NA	NA
Q64697	Q64697	Protein tyrosine phosphatase receptor type C-associated protein (PTPRC-associated protein) (CD45-associated protein) (CD45-AP) (LSM-1)	Ptprcap	54798.7	268135	140815	217248	NA	NA	NA	NA	222058	345915	1.60983e+06	635817
Q64737	Q64737	Trifunctional purine biosynthetic protein adenosine-3 [Includes: Phosphoribosylamine--glycine ligase (EC 6.3.4.13) (Glycinamide ribonucleotide synthetase) (GARS) (Phosphoribosylglycinamide synthetase); Phosphoribosylformylglycinamidine cyclo-ligase (EC 6.3.3.1) (AIR synthase) (AIRS) (Phosphoribosyl-aminoimidazole synthetase); Phosphoribosylglycinamide formyltransferase (EC 2.1.2.2) (5'-phosphorib…	Gart	NA	NA	NA	NA	772516	1.83391e+06	201870	705532	1.22283e+06	NA	NA	181331
Q65Z40	Q65Z40	Wings apart-like protein homolog (Dioxin-inducible factor 2) (DIF-2) (WAPL cohesin release factor)	Wapl	NA	NA	NA	NA	8.686e+06	6.12712e+06	5.28049e+06	6.1087e+06	NA	NA	NA	NA
Q66JS6	Q66JS6	Eukaryotic translation initiation factor 3 subunit J-B (eIF3j-B) (Eukaryotic translation initiation factor 3 subunit 1-B) (eIF-3-alpha-B) (eIF3 p35)	Eif3j2	NA	NA	NA	NA	911468	1713497	1.1482e+06	1742690	NA	NA	NA	NA
Q68ED3	Q68ED3	Terminal nucleotidyltransferase 4B (Non-canonical poly(A) RNA polymerase PAPD5) (EC 2.7.7.19) (PAP-associated domain-containing protein 5) (Terminal guanylyltransferase) (EC 2.7.7.-) (Terminal uridylyltransferase 3) (TUTase 3) (Topoisomerase-related function protein 4-2) (TRF4-2)	Tent4b	NA	NA	NA	NA	60692660	35436160	66040348	53745920	NA	NA	NA	NA
Q68FD5	Q68FD5	Clathrin heavy chain 1	Cltc	NA	840989	1.54128e+06	NA	6.17388e+06	12748482	5.12685e+06	7.55934e+06	1.12615e+07	2.31265e+06	2.62713e+07	8.61414e+06
Q68FE6	Q68FE6	Rho family-interacting cell polarization regulator 1	Ripor1	NA	NA	NA	NA	NA	NA	NA	NA	2.22481e+08	8.16182e+07	2.70732e+08	1.80383e+08
Q68FE8-1	Q68FE8	Zinc finger protein 280D (Suppressor of hairy wing homolog 4)	Znf280d	NA	NA	NA	NA	1.40836e+06	392173	159077	720655	NA	NA	NA	NA
Q68FF6	Q68FF6	ARF GTPase-activating protein GIT1 (ARF GAP GIT1) (G protein-coupled receptor kinase-interactor 1) (GRK-interacting protein 1)	Git1	NA	NA	NA	NA	3.16449e+07	2.9191e+07	5.21376e+06	2.01571e+07	2.82319e+08	1.2779e+08	3.32697e+08	2.27246e+08
Q68FG3	Q68FG3	Protein SPT2 homolog (SPT2 domain-containing protein 1)	Spty2d1	NA	NA	NA	NA	1.52749e+06	1.84583e+06	1.1006e+06	1.17445e+06	5.81198e+06	1.326e+06	4.06653e+06	6.07019e+06
Q69Z38	Q69Z38	Inactive tyrosine-protein kinase PEAK1 (Pseudopodium-enriched atypical kinase 1) (Sugen kinase 269) (Tyrosine-protein kinase SgK269)	Peak1	NA	NA	NA	NA	1.4737e+08	2.9866e+08	7.83576e+07	1.12456e+08	29270578	2.86927e+06	4.91252e+07	2.11769e+07
Q69Z66-1	Q69Z66	Deubiquitinase MYSM1 (2A-DUB) (EC 3.4.19.-) (Myb-like, SWIRM and MPN domain-containing protein 1)	Mysm1	NA	NA	NA	NA	4992628	5.40314e+06	2.49559e+06	3.7572e+06	NA	NA	NA	NA
Q69Z99	Q69Z99	Zinc finger protein 512	Znf512	NA	NA	NA	NA	1.53819e+07	1.48794e+07	5.80847e+06	7.97137e+06	1.31875e+06	302470	NA	1.10495e+06
Q69ZA1	Q69ZA1	Cyclin-dependent kinase 13 (EC 2.7.11.22) (EC 2.7.11.23) (CDC2-related protein kinase 5) (Cell division cycle 2-like protein kinase 5) (Cell division protein kinase 13)	Cdk13	NA	NA	NA	NA	1.10117e+06	1.13916e+06	484834	815613	NA	NA	NA	NA
Q69ZB8-1	Q69ZB8	Zinc finger CCHC domain-containing protein 2	Zcchc2	NA	NA	NA	NA	NA	NA	NA	NA	NA	NA	NA	NA
Q69ZH9	Q69ZH9	Rho GTPase-activating protein 23 (Rho-type GTPase-activating protein 23)	Arhgap23	NA	NA	NA	NA	1.7135e+06	1.90779e+06	2.39269e+06	2.59172e+06	2.01933e+06	NA	1.60141e+06	2.45204e+06
Q69ZI1	Q69ZI1	E3 ubiquitin-protein ligase SH3RF1 (EC 2.3.2.27) (Plenty of SH3s) (Protein POSH) (RING-type E3 ubiquitin transferase SH3RF1) (SH3 domain-containing RING finger protein 1) (SH3 multiple domains protein 2)	Sh3rf1	NA	NA	NA	NA	5281046	7.34536e+06	3.77026e+06	4.56884e+06	NA	NA	NA	NA
Q69ZK6	Q69ZK6	Probable JmjC domain-containing histone demethylation protein 2C (EC 1.14.11.-) (Jumonji domain-containing protein 1C)	Jmjd1c	NA	NA	NA	NA	4.58722e+06	4.38998e+06	4.45491e+06	5.06538e+06	NA	NA	NA	NA
Q69ZN7-1	Q69ZN7	Myoferlin (Fer-1-like protein 3)	Myof	3.49038e+06	7.1866e+06	5.42722e+06	5.63913e+06	1.92238e+08	2.4117e+08	8.12892e+07	1.95968e+08	3.04604e+07	7.93365e+06	7.37298e+07	27984905
Q69ZQ2	Q69ZQ2	Pre-mRNA-splicing factor ISY1 homolog	Isy1	NA	NA	NA	NA	282323	85669.9	104295	102044	NA	NA	NA	NA
Q69ZR2	Q69ZR2	E3 ubiquitin-protein ligase HECTD1 (EC 2.3.2.26) (HECT domain-containing protein 1) (HECT-type E3 ubiquitin transferase HECTD1) (Protein open mind)	Hectd1	184794	37655.9	34446.8	NA	NA	NA	NA	NA	NA	NA	NA	NA
Q69ZR9-1	Q69ZR9	Protein TASOR (Transgene activation suppressor protein)	Tasor	NA	NA	NA	NA	5.8258e+06	6.7228e+06	3.41194e+06	3.91533e+06	NA	NA	NA	NA
Q69ZX6	Q69ZX6	ATPase MORC2A (EC 3.6.1.-) (MORC family CW-type zinc finger protein 2A) (Zinc finger CW-type coiled-coil domain protein 1)	Morc2a	NA	NA	NA	NA	NA	NA	NA	NA	NA	NA	NA	NA
Q69ZZ9	Q69ZZ9	Microtubule-actin cross-linking factor 1, isoforms 6/7 (Uncharacterized protein KIAA0754)	Macf1	NA	NA	NA	NA	NA	NA	NA	NA	NA	NA	NA	NA
Q6A026	Q6A026	Sister chromatid cohesion protein PDS5 homolog A	Pds5a	NA	NA	NA	NA	2.54544e+06	2.78899e+06	1.75194e+06	2.27243e+06	NA	NA	NA	NA
Q6A028	Q6A028	Switch-associated protein 70 (SWAP-70)	Swap70	NA	NA	NA	NA	1.9265e+07	29375648	1.12086e+07	1.31736e+07	9.18958e+06	1.88711e+06	6.15389e+06	5.14132e+06
Q6A065	Q6A065	Centrosomal protein of 170 kDa (Cep170)	Cep170	NA	NA	NA	NA	5.99653e+07	7.51626e+07	3.98311e+07	5.27719e+07	1.38106e+07	3.57223e+06	1.62921e+07	8.4832e+06
Q6A068	Q6A068	Cell division cycle 5-like protein (Cdc5-like protein)	Cdc5l	NA	NA	NA	NA	1.98275e+07	2.38921e+07	1.25365e+07	1.51221e+07	46239	NA	2.89837e+06	854062
Q6A0A9	Q6A0A9	Constitutive coactivator of PPAR-gamma-like protein 1 (Oxidative stress-associated Src activator) (Protein FAM120A)	FAM120A	NA	NA	NA	NA	1.43063e+07	1.59725e+07	4.40425e+06	7.36045e+06	433166	180603	1.28738e+06	550827
Q6A0D4	Q6A0D4	Raftlin (Raft-linking protein)	Rftn1	NA	NA	NA	NA	767637	1.10579e+06	388959	486254	NA	NA	NA	NA
Q6A4J8	Q6A4J8	Ubiquitin carboxyl-terminal hydrolase 7 (EC 3.4.19.12) (Deubiquitinating enzyme 7) (Herpesvirus-associated ubiquitin-specific protease) (mHAUSP) (Ubiquitin thioesterase 7) (Ubiquitin-specific-processing protease 7)	Usp7	NA	NA	NA	NA	NA	NA	NA	NA	1.2484e+06	NA	1.44456e+06	985965
Q6AW69-1	Q6AW69	Cingulin-like protein 1	Cgnl1	175153	714960	277326	1.27319e+06	3.54725e+07	6.37639e+07	2.37857e+07	3.94031e+07	270979449	6.60287e+07	2.38372e+08	2.01251e+08
Q6B8I0-1	Q6B8I0	Dual specificity protein phosphatase 13 isoform A (DUSP13A) (EC 3.1.3.16) (EC 3.1.3.48) (Muscle-restricted DSP)	Dusp13	NA	NA	NA	NA	87717.2	62208.6	29971.4	55544.7	NA	NA	NA	NA
Q6DFV3	Q6DFV3	Rho GTPase-activating protein 21 (Rho GTPase-activating protein 10) (Rho-type GTPase-activating protein 21)	Arhgap21	NA	NA	NA	NA	NA	NA	NA	NA	NA	NA	NA	NA
Q6DFW4	Q6DFW4	Nucleolar protein 58 (MSSP) (Nucleolar protein 5) (SIK-similar protein)	Nop58	NA	581393	388227	663241	4.40323e+07	4.87332e+07	3.38818e+07	4.05007e+07	2.6961e+07	6.14199e+06	4.66467e+07	2.12839e+07
Q6DFX2	Q6DFX2	Anthrax toxin receptor 2	Antxr2	NA	NA	NA	NA	NA	NA	NA	NA	NA	NA	NA	NA
Q6EJB6	Q6EJB6	U3 small nucleolar RNA-associated protein 14 homolog B (Juvenile spermatogonial depletion protein)	Utp14b	NA	NA	NA	NA	NA	NA	NA	NA	218175	220514	4.23461e+06	266546
Q6GQX2	Q6GQX2	Nck-associated protein 5-like (Centrosomal protein of 169 kDa) (Cep169)	Nckap5l	NA	NA	NA	NA	NA	NA	NA	NA	1.10629e+07	863466	3.43329e+06	2.42698e+06
Q6GV12	Q6GV12	3-ketodihydrosphingosine reductase (KDS reductase) (EC 1.1.1.102) (3-dehydrosphinganine reductase) (Follicular variant translocation protein 1 homolog) (FVT-1)	Kdsr	NA	NA	NA	NA	3.88325e+06	5212467	2.63467e+06	2.72418e+06	4.48606e+06	NA	1.99489e+06	3.32287e+06
Q6IFX2	Q6IFX2	Keratin, type I cytoskeletal 42 (Cytokeratin-42) (CK-42) (Keratin-17n) (Keratin-42) (K42) (Type I keratin Ka22)	Krt42	NA	NA	NA	NA	1.03972e+07	3.87233e+06	14288866	1.14921e+06	1.22307e+07	2.09415e+07	5.36898e+07	3.71152e+06
Q6IME9	Q6IME9	Keratin, type II cytoskeletal 72 (Cytokeratin-72) (CK-72) (Keratin-72) (K72) (Type II inner root sheath-specific keratin-K6irs2) (Type-II keratin Kb35)	Krt72	NA	NA	NA	NA	1.46089e+06	NA	2.64741e+06	NA	348707	NA	6.7619e+06	180172
Q6IRU2	Q6IRU2	Tropomyosin alpha-4 chain (Tropomyosin-4)	Tpm4	NA	720968	480244	1.88589e+06	1.2918e+07	1.79469e+07	1.51941e+07	16903835	4.61967e+06	2.59379e+06	395292	5.44073e+06
Q6KCD5-1	Q6KCD5	Nipped-B-like protein (Delangin homolog) (SCC2 homolog)	Nipbl	NA	NA	NA	NA	4.05934e+06	4.71769e+06	2.43476e+06	3.51146e+06	NA	NA	NA	NA
Q6L8S8	Q6L8S8	Beta-1,4-N-acetylgalactosaminyltransferase 3 (Beta4GalNAc-T3) (Beta4GalNAcT3) (EC 2.4.1.244) (Beta-1,4-N-acetylgalactosaminyltransferase III) (N-acetyl-beta-glucosaminyl-glycoprotein 4-beta-N-acetylgalactosaminyltransferase 2) (NGalNAc-T2)	B4galnt3	NA	NA	NA	NA	2.01433e+06	2.92299e+06	NA	2.09207e+06	NA	NA	NA	NA
Q6NS46	Q6NS46	Protein RRP5 homolog (Apoptosis-linked gene 4 protein) (Programmed cell death protein 11)	Pdcd11	NA	NA	NA	NA	4.3809e+06	3.90488e+06	2.55369e+06	3.07334e+06	442598	155186	4.14951e+06	1.21207e+06
Q6NSQ7	Q6NSQ7	Protein LTV1 homolog	Ltv1	NA	NA	NA	NA	1.46227e+06	1.71644e+06	961066	1.18983e+06	1.7662e+06	217051	1909224	1.21572e+06
Q6NTA4	Q6NTA4	Ras-related GTP-binding protein B (Rag B) (RagB) (EC 3.6.5.-)	Rragb	NA	NA	NA	NA	1198736	1358262	672201	NA	NA	NA	NA	NA
Q6NV83-1	Q6NV83	U2 snRNP-associated SURP motif-containing protein (140 kDa Ser/Arg-rich domain protein) (U2-associated protein SR140)	U2surp	NA	NA	NA	NA	1.28549e+08	1.41922e+08	5.1709e+07	8.31304e+07	1.69753e+06	84299.8	5331647	2.59428e+06
Q6NVE8	Q6NVE8	WD repeat-containing protein 44 (Rabphilin-11)	Wdr44	NA	NA	NA	NA	526698	593181	446614	801538	NA	NA	NA	NA
Q6NVF0	Q6NVF0	Inositol polyphosphate 5-phosphatase OCRL (EC 3.1.3.36) (EC 3.1.3.56) (Inositol polyphosphate 5-phosphatase OCRL-1) (Phosphatidylinositol 3,4,5-triphosphate 5-phosphatase) (EC 3.1.3.86)	Ocrl	NA	NA	NA	NA	NA	NA	NA	NA	317270	928098	NA	129169
Q6NVF9	Q6NVF9	Cleavage and polyadenylation specificity factor subunit 6	Cpsf6	NA	NA	NA	NA	635186	711934	413451	584544	356260	NA	2.63758e+06	448826
Q6NWW9	Q6NWW9	Fibronectin type III domain-containing protein 3B (Factor for adipocyte differentiation 104) (HCV NS5A-binding protein 37)	Fndc3b	NA	173418	101222	NA	2.00928e+06	4.25528e+06	1544192	1.78688e+06	915217	602420	NA	NA
Q6NXH9	Q6NXH9	Keratin, type II cytoskeletal 73 (Cytokeratin-73) (CK-73) (Keratin-73) (K73) (Type II inner root sheath-specific keratin-K6irs3) (Type-II keratin Kb36)	Krt73	NA	9704540	28539832	4926133	27611242	23479772	76998944	10030571	22444876	9.52075e+07	2.53747e+08	9.21178e+06
Q6NXI6	Q6NXI6	Regulation of nuclear pre-mRNA domain-containing protein 2	Rprd2	NA	NA	NA	NA	2.21837e+09	4.07522e+09	1.46685e+09	2.8784e+09	2.93528e+09	1.24887e+09	2.97422e+09	2.33643e+09
Q6NZA9	Q6NZA9	Transcription initiation factor TFIID subunit 9B (Transcription initiation factor TFIID subunit 9-like) (Transcription-associated factor TAFII31L)	Taf9b	NA	NA	NA	NA	2.97897e+06	1.90411e+06	1769343	2.0551e+06	NA	NA	NA	NA
Q6NZC7	Q6NZC7	SEC23-interacting protein	Sec23ip	NA	NA	NA	NA	NA	NA	NA	NA	NA	NA	NA	NA
Q6NZF1	Q6NZF1	Zinc finger CCCH domain-containing protein 11A	Zc3h11a	NA	NA	NA	NA	3.64081e+08	3.38975e+08	1.8794e+08	2.46729e+08	2.87551e+06	1.04797e+06	1.69489e+06	3.17347e+06
Q6NZJ6	Q6NZJ6	Eukaryotic translation initiation factor 4 gamma 1 (eIF-4-gamma 1) (eIF-4G 1) (eIF-4G1)	Eif4g1	NA	NA	NA	NA	7.30845e+07	1.0266e+08	4.82645e+07	6.94822e+07	735597	NA	764285	514780
Q6NZK5-1	Q6NZK5	Protein hinderin	Kiaa1328	NA	NA	NA	NA	NA	NA	NA	NA	7.4483e+06	NA	NA	NA
Q6NZN0-1	Q6NZN0	RNA-binding protein 26 (Protein expressed in male leptotene and zygotene spermatocytes 393) (MLZ-393) (RNA-binding motif protein 26)	Rbm26	NA	NA	NA	NA	3.23797e+06	3.62781e+06	2.25978e+06	3.1296e+06	NA	NA	NA	NA
Q6NZQ2	Q6NZQ2	Probable ATP-dependent RNA helicase DDX31 (EC 3.6.4.13) (DEAD box protein 31)	Ddx31	NA	NA	NA	NA	1.40791e+06	1.27232e+06	274467	1.08753e+06	NA	NA	NA	NA
Q6NZR2	Q6NZR2	Myb/SANT-like DNA-binding domain-containing protein 2	Msantd2	NA	NA	NA	NA	488098	1.02409e+06	555031	NA	NA	NA	NA	NA
Q6P069-1	Q6P069	Sorcin	Sri	NA	NA	NA	NA	704790	137426	656768	656562	NA	679003	220576	858414
Q6P1H6-1	Q6P1H6	Ankyrin repeat and LEM domain-containing protein 2 (LEM domain-containing protein 4)	Ankle2	NA	NA	NA	NA	1.55868e+07	2.19491e+07	4715927	9.50607e+06	NA	NA	NA	NA
Q6P2L6	Q6P2L6	Histone-lysine N-methyltransferase NSD3 (EC 2.1.1.370) (EC 2.1.1.371) (Nuclear SET domain-containing protein 3) (Wolf-Hirschhorn syndrome candidate 1-like protein 1 homolog) (WHSC1-like protein 1)	Nsd3	NA	NA	NA	NA	1.43822e+06	1.49693e+06	935338	1.05878e+06	NA	NA	NA	NA
Q6P3A8-1	Q6P3A8	2-oxoisovalerate dehydrogenase subunit beta, mitochondrial (EC 1.2.4.4) (Branched-chain alpha-keto acid dehydrogenase E1 component beta chain) (BCKDE1B) (BCKDH E1-beta)	Bckdhb	NA	11219575	6141296	9903973	NA	NA	NA	NA	1.82459e+06	166149	2.52648e+06	1.52982e+06
Q6P3Y5-1	Q6P3Y5	Zinc finger protein 280C (Suppressor of hairy wing homolog 3)	Znf280c	NA	NA	NA	NA	1.51971e+07	1.62031e+07	7.75221e+06	1.13654e+07	297163	NA	548128	255513
Q6P4S8	Q6P4S8	Integrator complex subunit 1 (Int1)	Ints1	NA	NA	NA	NA	1.49837e+08	1.65421e+08	8.94674e+07	1.06438e+08	1.18652e+06	334931	2.09045e+06	1363961
Q6P4T2	Q6P4T2	U5 small nuclear ribonucleoprotein 200 kDa helicase (EC 3.6.4.13) (BRR2 homolog) (U5 snRNP-specific 200 kDa protein) (U5-200KD)	Snrnp200	191382	441733	306014	404534	2.32054e+07	2.10795e+07	1.30048e+07	1.87379e+07	3.59709e+06	586058	3367011	2869778
Q6P542	Q6P542	ATP-binding cassette sub-family F member 1	Abcf1	NA	NA	NA	NA	1.08988e+06	1.18058e+06	224784	1.50723e+06	NA	NA	NA	NA
Q6P549	Q6P549	Phosphatidylinositol 3,4,5-trisphosphate 5-phosphatase 2 (EC 3.1.3.86) (Inositol polyphosphate phosphatase-like protein 1) (INPPL-1) (Protein 51C) (SH2 domain-containing inositol 5'-phosphatase 2) (SH2 domain-containing inositol phosphatase 2) (SHIP-2)	Inppl1	NA	NA	NA	NA	3.41755e+06	4.22322e+06	2.32319e+06	3.86831e+06	NA	NA	NA	NA
Q6P5B0	Q6P5B0	RRP12-like protein	Rrp12	NA	NA	NA	NA	488173	628043	369825	358588	NA	NA	NA	NA
Q6P5D8	Q6P5D8	Structural maintenance of chromosomes flexible hinge domain-containing protein 1 (SMC hinge domain-containing protein 1) (EC 3.6.1.-)	Smchd1	NA	NA	NA	NA	5.60431e+08	1432115644	4.60532e+08	5.69051e+08	1.03419e+07	NA	1.20469e+07	6.728e+06
Q6P5H2-1	Q6P5H2	Nestin	Nes	2.35696e+06	141723	197042	1463211	4.40794e+08	7.22142e+08	1.61848e+08	3.52126e+08	8.00278e+06	635593	6.82841e+06	9.37869e+06
Q6P6I6-1	Q6P6I6	DNA-directed RNA polymerase II subunit GRINL1A (DNA-directed RNA polymerase II subunit M) (Glutamate receptor-like protein 1A)	Polr2m	NA	NA	NA	NA	379582	485040	239172	244335	NA	NA	NA	NA
Q6P6L0	Q6P6L0	Filamin A-interacting protein 1-like (Protein down-regulated in ovarian cancer 1 homolog) (DOC-1)	Filip1l	NA	NA	NA	NA	2.17773e+06	6.3396e+06	1.35233e+06	2.26772e+06	2.90464e+07	5.10425e+06	1.60293e+07	1.10473e+07
Q6P8I4	Q6P8I4	PEST proteolytic signal-containing nuclear protein (PCNP) (PEST-containing nuclear protein)	Pcnp	NA	NA	NA	NA	4.30768e+07	4.53331e+07	3.5731e+07	3.99214e+07	2.91409e+06	372642	1.2221e+06	1.82374e+06
Q6P9J9	Q6P9J9	Anoctamin-6 (Small-conductance calcium-activated nonselective cation channel) (SCAN channel) (Transmembrane protein 16F)	Ano6	NA	NA	NA	NA	NA	NA	672635	1.77637e+06	290533	48636.4	165673	160375
Q6P9N1	Q6P9N1	Hyccin (Down-regulated by CTNNB1 protein A)	Hycc1	NA	NA	NA	NA	NA	NA	NA	NA	180558	NA	745413	170669
Q6P9R1	Q6P9R1	ATP-dependent RNA helicase DDX51 (EC 3.6.4.13) (DEAD box protein 51)	Ddx51	NA	NA	NA	NA	2.44686e+06	3.70882e+06	2.23643e+06	2.89343e+06	1.19696e+06	NA	NA	617032
Q6P9R4-1	Q6P9R4	Rho guanine nucleotide exchange factor 18	Arhgef18	NA	NA	NA	NA	NA	NA	NA	NA	284620	58226.4	130182	238015
Q6PAC3	Q6PAC3	DDB1- and CUL4-associated factor 13 (WD repeat and SOF domain-containing protein 1)	Dcaf13	NA	NA	NA	NA	4.99496e+06	4.01605e+06	3.41459e+06	3.70286e+06	1.17371e+06	379736	1.49422e+06	1.56193e+06
Q6PAJ1	Q6PAJ1	Breakpoint cluster region protein (EC 2.7.11.1)	Bcr	NA	NA	NA	NA	2.83082e+06	4.11851e+06	1.51736e+06	3.46115e+06	8.53754e+06	692234	8.18868e+06	6.05188e+06
Q6PAL7	Q6PAL7	Transcription factor Gibbin (AT-hook DNA-binding motif-containing protein 1)	Ahdc1	NA	NA	NA	NA	NA	NA	NA	NA	592965	339441	505256	444579
Q6PAM1	Q6PAM1	Alpha-taxilin	Txlna	NA	NA	NA	NA	NA	NA	NA	NA	3.12899e+06	9.28506e+06	2.07223e+06	1.49978e+06
Q6PAR5-1	Q6PAR5	GTPase-activating protein and VPS9 domain-containing protein 1 (GAPex-5) (Rab5-activating protein 6)	Gapvd1	NA	NA	NA	NA	1.424e+06	2.47569e+06	NA	477799	NA	NA	NA	NA
Q6PB44-1	Q6PB44	Tyrosine-protein phosphatase non-receptor type 23 (EC 3.1.3.48)	Ptpn23	NA	NA	NA	NA	255521	832743	90540.7	532747	NA	NA	NA	NA
Q6PB66	Q6PB66	Leucine-rich PPR motif-containing protein, mitochondrial (130 kDa leucine-rich protein) (LRP 130) (mLRP130)	Lrpprc	NA	NA	NA	NA	NA	NA	NA	NA	1.30726e+06	230361	2.25376e+06	732201
Q6PCQ0	Q6PCQ0	IQ domain-containing protein E	Iqce	NA	NA	NA	NA	NA	NA	NA	NA	189285	102462	546336	431248
Q6PD26	Q6PD26	GPI transamidase component PIG-S (Phosphatidylinositol-glycan biosynthesis class S protein)	Pigs	NA	NA	NA	NA	NA	NA	NA	NA	NA	NA	NA	NA
Q6PDH0	Q6PDH0	Pleckstrin homology-like domain family B member 1 (Protein LL5-alpha)	Phldb1	NA	NA	NA	NA	723747	1491243	294009	756668	NA	NA	NA	NA
Q6PDI5-1	Q6PDI5	Proteasome adapter and scaffold protein ECM29 (Proteasome-associated protein ECM29 homolog)	Ecpas	NA	NA	NA	NA	636881	421683	NA	NA	NA	NA	NA	NA
Q6PDK2	Q6PDK2	Histone-lysine N-methyltransferase 2D (Lysine N-methyltransferase 2D) (EC 2.1.1.364) (ALL1-related protein) (Myeloid/lymphoid or mixed-lineage leukemia protein 2)	Kmt2d	NA	NA	NA	NA	311360	309356	277631	340443	NA	NA	NA	NA
Q6PDM1	Q6PDM1	Male-specific lethal 1 homolog (MSL-1) (Hampin) (Male-specific lethal 1-like 1) (MSL1-like 1) (Male-specific lethal-1 homolog 1)	Msl1	NA	NA	NA	NA	528420	594894	303368	442126	NA	NA	NA	NA
Q6PDM2	Q6PDM2	Serine/arginine-rich splicing factor 1 (ASF/SF2) (Pre-mRNA-splicing factor SRp30a) (Splicing factor, arginine/serine-rich 1)	Srsf1	NA	NA	NA	NA	NA	416959	NA	80201.7	NA	NA	NA	NA
Q6PDQ2	Q6PDQ2	Chromodomain-helicase-DNA-binding protein 4 (CHD-4) (EC 3.6.4.12)	Chd4	NA	NA	NA	NA	1.66782e+07	1.49232e+07	9.08884e+06	1.48234e+07	2.21902e+06	43665.5	4.87302e+06	2.14005e+06
Q6PDY0	Q6PDY0	Coiled-coil domain-containing protein 85B (Hepatitis delta antigen-interacting protein A homolog) (Delta-interacting protein A homolog)	Ccdc85b	NA	NA	NA	NA	NA	NA	NA	NA	718526	76653.5	582113	597684
Q6PFD9	Q6PFD9	Nuclear pore complex protein Nup98-Nup96 (EC 3.4.21.-) [Cleaved into: Nuclear pore complex protein Nup98 (98 kDa nucleoporin) (Nucleoporin Nup98) (Nup98); Nuclear pore complex protein Nup96 (96 kDa nucleoporin) (Nucleoporin Nup96) (Nup96)]	Nup98	NA	NA	NA	NA	5.49901e+07	8.69886e+07	2.65423e+07	4.52035e+07	4.46105e+06	213973	6.16504e+06	5.20991e+06
Q6PFR5	Q6PFR5	Transformer-2 protein homolog alpha (TRA-2 alpha) (TRA2-alpha) (Transformer-2 protein homolog A)	Tra2a	NA	NA	NA	NA	NA	NA	NA	NA	NA	NA	NA	NA
Q6PGC1	Q6PGC1	ATP-dependent RNA helicase DHX29 (EC 3.6.4.13) (DEAH box protein 29)	Dhx29	NA	NA	NA	NA	8.17715e+07	9.73214e+07	4.32645e+07	6.6663e+07	2.69573e+06	NA	4.11423e+06	2.93245e+06
Q6PGH2	Q6PGH2	Jupiter microtubule associated homolog 2 (Hematological and neurological expressed 1-like protein) (HN1-like protein)	Jpt2	NA	NA	NA	NA	2.04854e+06	1.93145e+06	641264	NA	156302	47048.2	3.34272e+06	NA
Q6PGL7-1	Q6PGL7	WASH complex subunit 2	Washc2	NA	NA	NA	NA	6.17038e+07	7.1502e+07	1.9538e+07	3.85204e+07	777721	NA	481979	772059
Q6PHN9	Q6PHN9	Ras-related protein Rab-35	Rab35	NA	NA	NA	NA	1.20595e+07	1.52174e+07	8.94252e+06	1.09071e+07	2.81138e+06	766551	436429	2.37258e+06
Q6PHZ2-1	Q6PHZ2	Calcium/calmodulin-dependent protein kinase type II subunit delta (CaM kinase II subunit delta) (CaMK-II subunit delta) (EC 2.7.11.17)	Camk2d	NA	NA	NA	NA	1.4228e+07	9.67761e+06	6.75185e+06	16976741	5.92638e+06	1.45978e+06	3.23377e+07	1.10095e+07
Q6PHZ5	Q6PHZ5	Putative RNA-binding protein 15B (RNA-binding motif protein 15B)	Rbm15b	NA	NA	NA	NA	NA	NA	NA	NA	2.61548e+06	147145	2.05646e+06	1.66501e+06
Q6PIJ4	Q6PIJ4	Nuclear factor related to kappa-B-binding protein (DNA-binding protein R kappa-B)	Nfrkb	NA	NA	NA	NA	1.95287e+07	24297140	1.25085e+07	16075825	NA	NA	NA	NA
Q6PIU9	Q6PIU9	Uncharacterized protein FLJ45252 homolog		NA	NA	NA	NA	1.50425e+07	2.57077e+07	1.04805e+07	1.07669e+07	2.58919e+06	549439	1.19919e+06	568301
Q6PR54-1	Q6PR54	Telomere-associated protein RIF1 (Rap1-interacting factor 1 homolog) (mRif1)	Rif1	NA	NA	NA	NA	2.65197e+07	3.82873e+07	1.52453e+07	1.90005e+07	NA	NA	NA	NA
Q6QI06	Q6QI06	Rapamycin-insensitive companion of mTOR (AVO3 homolog) (mAVO3) (Protein pianissimo)	Rictor	NA	NA	NA	NA	3.54237e+06	6.34698e+06	3.65423e+06	4.71741e+06	966245	70917.7	1.26983e+06	883768
Q6R891-1	Q6R891	Neurabin-2 (Neurabin-II) (Protein phosphatase 1 regulatory subunit 9B) (Spinophilin)	Ppp1r9b	NA	NA	NA	NA	8.2232e+06	8.07052e+06	5.55888e+06	5.73281e+06	7.35956e+06	348560	7.46947e+06	1.49398e+07
Q6RHR9	Q6RHR9	Membrane-associated guanylate kinase, WW and PDZ domain-containing protein 1 (BAI1-associated protein 1) (BAP-1) (Membrane-associated guanylate kinase inverted 1) (MAGI-1)	Magi1	NA	NA	NA	NA	1.05926e+06	1.0558e+06	777039	1382233	367745	NA	576330	540349
Q6TXD4	Q6TXD4	Dynamin-binding protein (Scaffold protein Tuba)	Dnmbp	NA	NA	NA	NA	NA	NA	NA	NA	1.39844e+06	445079	1.49449e+06	911004
Q6VGS5-1	Q6VGS5	Protein Daple (Coiled-coil domain-containing protein 88C) (Dvl-associating protein with a high frequency of leucine residues)	Ccdc88c	NA	NA	NA	NA	NA	NA	NA	NA	NA	NA	NA	NA
Q6VN19	Q6VN19	Ran-binding protein 10 (RanBP10)	Ranbp10	NA	NA	NA	NA	576011	843502	383879	430214	NA	NA	NA	NA
Q6Y7W8-1	Q6Y7W8	GRB10-interacting GYF protein 2 (PERQ amino acid-rich with GYF domain-containing protein 2) (Trinucleotide repeat-containing gene 15 protein)	Gigyf2	NA	NA	NA	NA	5533136	1.31668e+06	3.69976e+06	5.04013e+06	1.10718e+07	5.01678e+06	1.16491e+07	1.2379e+07
Q6ZPJ0	Q6ZPJ0	Testis-expressed protein 2	Tex2	NA	NA	NA	NA	1.04394e+07	1.01994e+07	4.36317e+06	5.35367e+06	NA	NA	NA	NA
Q6ZPJ3	Q6ZPJ3	(E3-independent) E2 ubiquitin-conjugating enzyme UBE2O (EC 2.3.2.24) (E2/E3 hybrid ubiquitin-protein ligase UBE2O) (Ubiquitin carrier protein O) (Ubiquitin-conjugating enzyme E2 O) (Ubiquitin-conjugating enzyme E2 of 230 kDa) (Ubiquitin-conjugating enzyme E2-230K) (Ubiquitin-protein ligase O)	Ube2o	NA	NA	NA	NA	NA	NA	NA	NA	NA	NA	NA	NA
Q6ZPR5-1	Q6ZPR5	Sphingomyelin phosphodiesterase 4 (EC 3.1.4.12) (Neutral sphingomyelinase 3) (nSMase-3) (nSMase3) (Neutral sphingomyelinase III)	Smpd4	NA	NA	NA	NA	NA	NA	NA	NA	367398	2.23223e+06	1.22733e+06	229621
Q6ZPV2-1	Q6ZPV2	Chromatin-remodeling ATPase INO80 (EC 3.6.4.-) (DNA helicase-related INO80 complex homolog 1) (DNA helicase-related protein INO80)	Ino80	NA	NA	NA	NA	697858	928030	NA	622264	NA	NA	NA	NA
Q6ZPZ3	Q6ZPZ3	Zinc finger CCCH domain-containing protein 4	Zc3h4	NA	NA	NA	NA	1.17033e+07	1.44208e+07	5.38908e+06	7.87724e+06	NA	NA	NA	NA
Q6ZQ03-1	Q6ZQ03	Formin-binding protein 4 (Formin-binding protein 30)	Fnbp4	NA	NA	NA	NA	4.09855e+06	4.72655e+06	1.80628e+06	2.63012e+06	NA	NA	NA	NA
Q6ZQ06	Q6ZQ06	Centrosomal protein of 162 kDa (Cep162) (Protein QN1 homolog)	Cep162	NA	NA	NA	NA	NA	NA	NA	NA	2.87324e+06	997186	2.97939e+06	4.34811e+06
Q6ZQ08-1	Q6ZQ08	CCR4-NOT transcription complex subunit 1 (CCR4-associated factor 1)	Cnot1	NA	NA	NA	NA	8.52594e+06	6841549	8.41311e+06	8.75497e+06	2.08433e+07	6.23147e+06	6.21439e+07	1.87506e+07
Q6ZQ38	Q6ZQ38	Cullin-associated NEDD8-dissociated protein 1 (Cullin-associated and neddylation-dissociated protein 1) (p120 CAND1)	Cand1	NA	NA	NA	NA	1449355	2.75134e+06	1.06249e+06	1.27732e+06	NA	NA	NA	NA
Q6ZQ58-1	Q6ZQ58	La-related protein 1 (La ribonucleoprotein domain family member 1)	Larp1	NA	NA	NA	NA	2.86476e+07	2.5957e+07	1.20111e+07	2.43636e+07	NA	NA	NA	NA
Q6ZQH8	Q6ZQH8	Nucleoporin NUP188	Nup188	NA	NA	NA	NA	346225	466699	NA	NA	NA	NA	NA	NA
Q6ZQL4	Q6ZQL4	WD repeat-containing protein 43	Wdr43	NA	NA	NA	NA	659007	744997	541246	389551	NA	NA	NA	NA
Q6ZWN5	Q6ZWN5	40S ribosomal protein S9	Rps9	NA	NA	357635	NA	1.62254e+07	1.33742e+07	1.02037e+07	1.77689e+07	1.92683e+07	1.67222e+06	7.48428e+07	3.00195e+07
Q6ZWR6-1	Q6ZWR6	Nesprin-1 (Enaptin) (KASH domain-containing protein 1) (KASH1) (Myocyte nuclear envelope protein 1) (Myne-1) (Nuclear envelope spectrin repeat protein 1) (Synaptic nuclear envelope protein 1) (Syne-1)	Syne1	NA	NA	NA	NA	954186	803922	859169	778535	NA	NA	NA	NA
Q6ZWU9	Q6ZWU9	40S ribosomal protein S27	Rps27	NA	NA	NA	NA	NA	NA	NA	NA	5652417	7.80192e+06	4.62795e+06	9.82327e+06
Q6ZWV3	Q6ZWV3	60S ribosomal protein L10 (Protein QM homolog) (Ribosomal protein L10)	Rpl10	NA	6.04895e+06	2591837	5.30311e+06	7.40492e+07	6.24424e+07	2.64904e+07	3.83985e+07	71550872	2.85068e+07	3.52664e+07	5.37398e+07
Q6ZWX6	Q6ZWX6	Eukaryotic translation initiation factor 2 subunit 1 (Eukaryotic translation initiation factor 2 subunit alpha) (eIF-2-alpha) (eIF-2A) (eIF-2alpha)	Eif2s1	NA	NA	NA	NA	906788	534614	344295	481108	2.41904e+06	NA	4.79763e+06	1.58631e+06
Q6ZWY3	Q6ZWY3	40S ribosomal protein S27-like	Rps27l	4.44832e+06	5801218	3.49478e+06	5206217	1.60185e+07	6.54484e+06	8.3372e+06	1.06516e+07	2750870907	3.98382e+06	458943	856984997
Q70FJ1-1	Q70FJ1	A-kinase anchor protein 9 (AKAP-9) (Protein kinase A-anchoring protein 9) (PRKA9)	Akap9	NA	NA	NA	NA	NA	NA	NA	NA	NA	NA	NA	NA
Q70IV5-1	Q70IV5	Synemin (Desmuslin)	Synm	NA	NA	NA	NA	NA	NA	NA	NA	NA	NA	87603	NA
Q71FD7	Q71FD7	Filamin-binding LIM protein 1 (FBLP-1) (CSX-associated LIM)	Fblim1	NA	NA	NA	NA	1.12803e+06	2.40229e+06	677728	1.016e+06	NA	NA	NA	NA
Q76KJ5	Q76KJ5	DNA-directed RNA polymerase I subunit RPA34 (A34.5) (DNA-directed RNA polymerase I subunit G) (RNA polymerase I-associated factor PAF49)	Polr1g	NA	NA	NA	NA	238081	209529	80579.5	103472	NA	NA	NA	NA
Q76MZ3	Q76MZ3	Serine/threonine-protein phosphatase 2A 65 kDa regulatory subunit A alpha isoform (PP2A subunit A isoform PR65-alpha) (PP2A subunit A isoform R1-alpha)	Ppp2r1a	187596	590236	466185	615156	1.8145e+06	1.03085e+06	616929	641094	262174	62687.6	3.84408e+06	173835
Q78IK2	Q78IK2	ATP synthase membrane subunit K, mitochondrial (ATP synthase membrane subunit DAPIT, mitochondrial) (Diabetes-associated protein in insulin-sensitive tissues) (Up-regulated during skeletal muscle growth protein 5)	Atp5mk	NA	NA	NA	NA	2.11566e+06	2.12086e+06	1.10693e+06	1439245	NA	NA	NA	NA
Q78PY7	Q78PY7	Staphylococcal nuclease domain-containing protein 1 (EC 3.1.31.1) (100 kDa coactivator) (p100 co-activator)	Snd1	NA	NA	NA	NA	2.49146e+06	2839991	581955	2124926	2.93259e+06	201928	1.9457e+06	2002089
Q78XF5	Q78XF5	Oligosaccharyltransferase complex subunit OSTC	Ostc	NA	NA	NA	NA	NA	NA	NA	NA	NA	NA	NA	1.12281e+06
Q78ZA7	Q78ZA7	Nucleosome assembly protein 1-like 4	Nap1l4	NA	NA	NA	NA	1.47889e+07	1.41771e+07	1.11178e+07	9.57431e+06	NA	NA	NA	NA
Q791N7	Q791N7	DNA-directed RNA polymerase I subunit RPA12 (DNA-directed RNA polymerase I subunit H) (Zinc ribbon domain-containing protein 1)	Polr1h	NA	NA	NA	NA	1775350	1.31914e+06	NA	NA	NA	NA	NA	NA
Q791V5	Q791V5	Mitochondrial carrier homolog 2 (Met-induced mitochondrial protein)	Mtch2	NA	30224.5	26837.1	3.11702e+06	18356030	26354651	15996509	14976585	2.69331e+07	8.05012e+06	4.6379e+07	2.46431e+07
Q7M6Y3-5	Q7M6Y3	Phosphatidylinositol-binding clathrin assembly protein (Clathrin assembly lymphoid myeloid leukemia) (CALM)	Picalm	NA	NA	NA	NA	6.30376e+06	1.35524e+07	3.25326e+06	4.91765e+06	8.18799e+06	1.0766e+06	9.20971e+06	5.83608e+06
Q7SIG6-1	Q7SIG6	Arf-GAP with SH3 domain, ANK repeat and PH domain-containing protein 2 (Development and differentiation-enhancing factor 2) (Paxillin-associated protein with ARF GAP activity 3) (PAG3) (Pyk2 C-terminus-associated protein) (PAP)	Asap2	NA	NA	NA	NA	NA	NA	NA	NA	1.36918e+08	1.47359e+08	6.87024e+08	1.80241e+07
Q7TMB8-1	Q7TMB8	Cytoplasmic FMR1-interacting protein 1 (Specifically Rac1-associated protein 1) (Sra-1)	Cyfip1	NA	NA	NA	NA	7090155	10657265	3.88694e+06	4.77118e+06	2.0688e+07	2.13821e+07	2.48713e+07	1.85832e+07
Q7TME0	Q7TME0	Phospholipid phosphatase-related protein type 4 (Brain-specific phosphatidic acid phosphatase-like protein 1) (Inactive 2-lysophosphatidate phosphatase PLPPR4) (Lipid phosphate phosphatase-related protein type 4) (Plasticity-related gene 1 protein) (PRG-1)	Plppr4	NA	NA	NA	NA	4.07323e+06	3.96022e+06	2578085	3213571	NA	NA	NA	NA
Q7TMK9	Q7TMK9	Heterogeneous nuclear ribonucleoprotein Q (hnRNP Q) (Glycine- and tyrosine-rich RNA-binding protein) (GRY-RBP) (NS1-associated protein 1) (Synaptotagmin-binding, cytoplasmic RNA-interacting protein) (pp68)	Syncrip	NA	NA	NA	NA	1.4163e+07	1.44905e+07	5.28243e+06	8147279	3.53138e+06	692618	1.33417e+07	3.44885e+06
Q7TMQ7	Q7TMQ7	WD repeat-containing protein 91	Wdr91	NA	NA	NA	NA	NA	NA	NA	NA	NA	NA	NA	NA
Q7TMY8	Q7TMY8	E3 ubiquitin-protein ligase HUWE1 (EC 2.3.2.26) (E3Histone) (HECT, UBA and WWE domain-containing protein 1) (HECT-type E3 ubiquitin transferase HUWE1) (Upstream regulatory element-binding protein 1) (URE-B1) (URE-binding protein 1)	Huwe1	NA	NA	NA	NA	3.8092e+06	3.29694e+06	NA	616827	NA	NA	NA	NA
Q7TN98-1	Q7TN98	Cytoplasmic polyadenylation element-binding protein 4 (CPE-BP4) (CPE-binding protein 4) (mCPEB-4)	Cpeb4	NA	NA	NA	NA	NA	NA	NA	NA	1.12929e+06	NA	NA	476228
Q7TNB8-1	Q7TNB8	Protein strawberry notch homolog 2	Sbno2	NA	NA	NA	NA	NA	NA	NA	NA	2.07585e+06	NA	NA	660724
Q7TPD0	Q7TPD0	Integrator complex subunit 3 (Int3) (SOSS complex subunit A) (Sensor of single-strand DNA complex subunit A) (SOSS-A) (Sensor of ssDNA subunit A)	Ints3	NA	NA	NA	NA	554011	834740	342318	498159	343442	NA	NA	324134
Q7TPM1-1	Q7TPM1	Protein PRRC2B (HLA-B-associated transcript 2-like 1) (Proline-rich coiled-coil protein 2B)	Prrc2b	NA	NA	NA	NA	1.96196e+06	3.96315e+06	876045	1.44707e+06	1.42582e+07	2.23537e+06	4.63553e+06	6.17045e+06
Q7TPR4	Q7TPR4	Alpha-actinin-1 (Alpha-actinin cytoskeletal isoform) (F-actin cross-linking protein) (Non-muscle alpha-actinin-1)	Actn1	NA	NA	NA	NA	5.97209e+06	9.90151e+06	8.08352e+06	6.83754e+06	NA	NA	1.82895e+07	4.39794e+06
Q7TPV4	Q7TPV4	Myb-binding protein 1A (Myb-binding protein of 160 kDa)	Mybbp1a	13358734	1.93866e+06	1.52008e+06	1.05213e+06	1.35215e+08	1.56958e+08	6.37097e+07	8.74468e+07	2.51795e+07	1.69711e+06	3.24597e+07	2.89828e+07
Q7TQ95	Q7TQ95	Endoplasmic reticulum junction formation protein lunapark (ER junction formation factor lunapark) (Protein ulnaless)	Lnpk	NA	NA	NA	NA	1.68538e+06	1.49864e+06	996230	1.18851e+06	NA	NA	NA	NA
Q7TQG1	Q7TQG1	Pleckstrin homology domain-containing family A member 6 (PH domain-containing family A member 6) (Phosphoinositol 3-phosphate-binding protein 3) (PEPP-3)	Plekha6	NA	NA	NA	NA	NA	NA	NA	NA	NA	NA	NA	NA
Q7TQH0	Q7TQH0	Ataxin-2-like protein	Atxn2l	NA	NA	NA	NA	NA	NA	NA	NA	5.0839e+06	297082	6.04243e+06	3.26013e+06
Q7TQH0-2	Q7TQH0	Ataxin-2-like protein	Atxn2l	NA	NA	NA	NA	1.49406e+08	1.95041e+08	8.22194e+07	1.05286e+08	NA	NA	NA	NA
Q7TQK0	Q7TQK0	Cyclin-T2 (CycT2)	Ccnt2	NA	NA	NA	NA	NA	NA	NA	NA	NA	73102.6	482029	NA
Q7TQK1-1	Q7TQK1	Integrator complex subunit 7 (Int7)	Ints7	NA	NA	NA	NA	NA	NA	NA	NA	5.54635e+06	3.3269e+06	2.36346e+07	5.7926e+06
Q7TS74-1	Q7TS74	Cytoskeleton-associated protein 2-like (Radial fiber and mitotic spindle protein) (Radmis)	Ckap2l	NA	NA	NA	NA	NA	NA	NA	NA	4.58131e+06	NA	NA	387016
Q7TSC1	Q7TSC1	Protein PRRC2A (HLA-B-associated transcript 2) (Proline-rich and coiled-coil-containing protein 2A)	Prrc2a	NA	NA	NA	NA	7.83907e+07	9.00185e+07	4.08545e+07	6.13372e+07	3.73465e+06	NA	1.51029e+06	2.52883e+06
Q7TSH3	Q7TSH3	Zinc finger protein 516	Znf516	NA	NA	NA	NA	NA	NA	NA	NA	NA	NA	NA	NA
Q7TSI1	Q7TSI1	Pleckstrin homology domain-containing family M member 1 (PH domain-containing family M member 1)	Plekhm1	NA	NA	NA	NA	NA	NA	NA	NA	NA	NA	NA	NA
Q7TT00	Q7TT00	Transcription factor SPT20 homolog (p38-interacting protein) (p38IP)	Supt20h	NA	NA	NA	NA	1.41223e+06	1.22689e+06	1.108e+06	1.30936e+06	NA	NA	NA	NA
Q7TT28	Q7TT28	RNA exonuclease 1 homolog (EC 3.1.-.-) (Transcription elongation factor B polypeptide 3-binding protein 1)	Rexo1	NA	NA	NA	NA	NA	NA	NA	NA	4380193	NA	2.49176e+06	3.26024e+06
Q7TT50	Q7TT50	Serine/threonine-protein kinase MRCK beta (EC 2.7.11.1) (CDC42-binding protein kinase beta) (DMPK-like beta) (Myotonic dystrophy kinase-related CDC42-binding kinase beta) (MRCK beta) (Myotonic dystrophy protein kinase-like beta)	Cdc42bpb	NA	NA	NA	NA	1.29685e+07	1.77456e+07	1.06304e+07	1.20564e+07	1.37218e+07	3.37665e+06	1.84522e+07	1.1203e+07
Q80ST9-1	Q80ST9	Lebercilin (Leber congenital amaurosis 5 protein homolog)	Lca5	NA	NA	NA	NA	950918	986483	NA	NA	1.93335e+06	717822	827918	1.19643e+06
Q80SY4	Q80SY4	E3 ubiquitin-protein ligase MIB1 (EC 2.3.2.27) (DAPK-interacting protein 1) (DIP-1) (Mind bomb homolog 1) (RING-type E3 ubiquitin transferase MIB1)	Mib1	NA	NA	NA	NA	NA	NA	NA	NA	800784	50019.5	656095	525079
Q80T69	Q80T69	Lysine-specific demethylase 9 (KDM9) (EC 1.14.11.-) (Round spermatid basic protein 1) (Rosbin)	Rsbn1	NA	NA	NA	NA	14789968	1.59512e+07	1.10537e+07	1.36609e+07	NA	NA	NA	NA
Q80TE4-1	Q80TE4	Signal-induced proliferation-associated 1-like protein 2 (SIPA1-like protein 2)	Sipa1l2	NA	NA	NA	NA	1.21485e+06	2.65578e+06	454062	605761	2.14257e+07	3.30161e+06	19039530	1.41698e+07
Q80TE7	Q80TE7	Leucine-rich repeat-containing protein 7 (Densin-180) (Densin) (Protein LAP1)	Lrrc7	NA	NA	NA	NA	2642899	NA	NA	1.24314e+06	NA	NA	NA	NA
Q80TH2	Q80TH2	Erbin (Densin-180-like protein) (Erbb2-interacting protein) (Protein LAP2)	Erbin	NA	NA	NA	NA	2.81025e+07	6.22821e+07	9.39767e+06	2.11977e+07	2.06028e+07	3.0063e+06	1.83832e+07	1.99249e+07
Q80TM9-1	Q80TM9	Nischarin (Imidazoline receptor 1) (I-1) (IR1) (Imidazoline receptor I-1-like protein) (Imidazoline-1 receptor) (I1R)	Nisch	NA	NA	NA	NA	1.25518e+06	1581549	808704	616178	NA	NA	NA	NA
Q80TN7	Q80TN7	Neuron navigator 3 (Pore membrane and/or filament-interacting-like protein 1)	Nav3	NA	NA	NA	NA	NA	8248623	6.60865e+06	NA	NA	NA	NA	NA
Q80TQ2-1	Q80TQ2	Ubiquitin carboxyl-terminal hydrolase CYLD (EC 3.4.19.12) (Deubiquitinating enzyme CYLD) (Ubiquitin thioesterase CYLD) (Ubiquitin-specific-processing protease CYLD)	Cyld	NA	NA	NA	NA	NA	NA	NA	NA	2.31392e+07	4.05177e+06	1.66153e+07	1.07228e+07
Q80U22	Q80U22	AP-4 complex accessory subunit RUSC2 (Interacting protein of Rab1) (Iporin) (RUN and SH3 domain-containing protein 2)	Rusc2	NA	NA	NA	NA	NA	NA	NA	NA	117408	NA	657802	NA
Q80U58-1	Q80U58	Pumilio homolog 2	Pum2	153104	427277	254092	488887	3.34234e+06	396211	1.11997e+06	1.4898e+06	NA	NA	NA	NA
Q80U59-1	Q80U59	Uncharacterized protein KIAA0232	Kiaa0232	NA	NA	NA	NA	NA	NA	NA	NA	2.97019e+06	186106	NA	949210
Q80U70	Q80U70	Polycomb protein Suz12 (Suppressor of zeste 12 protein homolog)	Suz12	NA	NA	NA	NA	2.33934e+06	2.50102e+06	970113	1.69569e+06	NA	NA	NA	NA
Q80U72-1	Q80U72	Protein scribble homolog (Scribble) (Protein LAP4)	Scrib	NA	NA	NA	NA	6.33223e+06	1.04166e+07	2.89382e+06	5.06866e+06	529526	NA	NA	408689
Q80U93	Q80U93	Nuclear pore complex protein Nup214 (214 kDa nucleoporin) (Nucleoporin Nup214)	Nup214	NA	NA	NA	NA	2.12587e+08	2.68195e+08	1.33985e+08	1.90914e+08	181450	NA	NA	1641467
Q80UG5-1	Q80UG5	Septin-9 (SL3-3 integration site 1 protein)	Septin9	NA	NA	NA	NA	3.61407e+07	5.87207e+07	2.0771e+07	3.06913e+07	5.2816e+06	683901	1.00476e+06	2.46525e+06
Q80UJ7	Q80UJ7	Rab3 GTPase-activating protein catalytic subunit (RAB3 GTPase-activating protein 130 kDa subunit) (Rab3-GAP p130) (Rab3-GAP)	Rab3gap1	NA	NA	NA	NA	8.14124e+06	9.49057e+06	4.66054e+06	6.30656e+06	2.25096e+06	88328.2	1492632	2.07143e+06
Q80UU9	Q80UU9	Membrane-associated progesterone receptor component 2	Pgrmc2	NA	NA	NA	NA	NA	NA	NA	NA	195516	NA	435067	NA
Q80UV9-1	Q80UV9	Transcription initiation factor TFIID subunit 1 (EC 2.3.1.48) (EC 2.7.11.1) (Cell cycle gene 1 protein) (TBP-associated factor 250 kDa) (p250) (Transcription initiation factor TFIID 250 kDa subunit) (TAF(II)250) (TAFII-250) (TAFII250)	Taf1	NA	NA	NA	NA	3.17762e+06	3.51167e+06	1.26285e+06	2.75588e+06	NA	NA	NA	NA
Q80UZ0-1	Q80UZ0	FYVE, RhoGEF and PH domain-containing protein 5	Fgd5	NA	NA	NA	NA	NA	NA	NA	NA	2.23875e+06	970607	4.1095e+06	2.50553e+06
Q80VI1	Q80VI1	E3 ubiquitin-protein ligase TRIM56 (EC 2.3.2.27) (Tripartite motif-containing protein 56)	Trim56	NA	NA	NA	NA	NA	NA	NA	NA	1069255	NA	NA	599798
Q80W00	Q80W00	Serine/threonine-protein phosphatase 1 regulatory subunit 10 (MHC class I region proline-rich protein CAT53)	Ppp1r10	NA	NA	NA	NA	2.18805e+07	2.43868e+07	7.84479e+06	1.28891e+07	NA	NA	NA	NA
Q80W47	Q80W47	WD repeat domain phosphoinositide-interacting protein 2 (WIPI-2)	Wipi2	NA	NA	NA	NA	1.45502e+06	5.70162e+06	2.74327e+06	1.38542e+06	310583	NA	NA	135469
Q80W68	Q80W68	Kin of IRRE-like protein 1 (Kin of irregular chiasm-like protein 1) (Nephrin-like protein 1)	Kirrel1	NA	NA	NA	NA	NA	NA	NA	NA	559007	215083	NA	792378
Q80WC1	Q80WC1	Ubinuclein-2	Ubn2	NA	NA	NA	NA	NA	1.04276e+06	NA	677119	431881	NA	453625	814824
Q80WE4	Q80WE4	Kinesin-like protein KIF20B (Kinesin family member 20B) (Kinesin-related motor interacting with PIN1) (M-phase phosphoprotein 1) (MPP1)	Kif20b	NA	NA	NA	NA	NA	NA	247851	NA	NA	NA	NA	NA
Q80WJ7	Q80WJ7	Protein LYRIC (3D3/LYRIC) (Lysine-rich CEACAM1 co-isolated protein) (Metadherin) (Metastasis adhesion protein)	Mtdh	NA	NA	NA	NA	3.31296e+07	3.27338e+07	1.88432e+07	1.84656e+07	NA	NA	NA	NA
Q80WS3	Q80WS3	rRNA/tRNA 2'-O-methyltransferase fibrillarin-like protein 1 (EC 2.1.1.-) (Protein-glutamine methyltransferase)	Fbll1	NA	NA	NA	NA	NA	NA	NA	NA	1.1341e+06	NA	2.28511e+07	1.36736e+06
Q80WT5	Q80WT5	Aftiphilin	Aftph	NA	NA	NA	NA	NA	NA	NA	NA	NA	NA	NA	NA
Q80X32	Q80X32	UPF0461 protein C5orf24 homolog		NA	NA	NA	NA	1.18441e+06	965448	718381	734899	NA	NA	NA	NA
Q80X50	Q80X50	Ubiquitin-associated protein 2-like (RNA polymerase II degradation factor Ubap2l)	Ubap2l	NA	NA	NA	NA	NA	NA	NA	NA	3.95428e+07	7.87729e+06	4.59167e+07	2.59967e+07
Q80X50-2	Q80X50	Ubiquitin-associated protein 2-like (RNA polymerase II degradation factor Ubap2l)	Ubap2l	NA	NA	NA	NA	1.96186e+08	1.50263e+08	1.30992e+08	1.58284e+08	NA	NA	NA	NA
Q80X50-5	Q80X50	Ubiquitin-associated protein 2-like (RNA polymerase II degradation factor Ubap2l)	Ubap2l	NA	NA	NA	NA	18058174	7.56703e+06	4.83004e+06	5.58082e+06	NA	NA	NA	NA
Q80X90	Q80X90	Filamin-B (FLN-B) (ABP-280-like protein) (Actin-binding-like protein) (Beta-filamin)	Flnb	1.37671e+06	3.39834e+06	2.33236e+06	5.94217e+06	4.76156e+07	5.84617e+07	4.00794e+07	4.60569e+07	2.84797e+07	1.54396e+06	1.08465e+08	1.64003e+07
Q80X95	Q80X95	Ras-related GTP-binding protein A (Rag A) (RagA) (EC 3.6.5.-)	Rraga	NA	NA	NA	NA	NA	NA	NA	NA	NA	NA	1.34482e+06	NA
Q80XC3-1	Q80XC3	USP6 N-terminal-like protein	Usp6nl	NA	NA	NA	NA	NA	204802	NA	34969.8	NA	NA	NA	NA
Q80XI1-2	Q80XI1	F-box only protein 34	Fbxo34	NA	5104539	7541574	12672890	NA	NA	NA	NA	NA	NA	NA	NA
Q80XI3-4	Q80XI3	Eukaryotic translation initiation factor 4 gamma 3 (eIF-4-gamma 3) (eIF-4G 3) (eIF4G 3) (eIF-4-gamma II) (eIF4GII)	Eif4g3	NA	NA	NA	NA	1.44723e+07	2.11857e+07	6.7973e+06	1.15254e+07	NA	NA	NA	NA
Q80XI4	Q80XI4	Phosphatidylinositol 5-phosphate 4-kinase type-2 beta (EC 2.7.1.149) (1-phosphatidylinositol 5-phosphate 4-kinase 2-beta) (Diphosphoinositide kinase 2-beta) (Phosphatidylinositol 5-phosphate 4-kinase type II beta) (PI(5)P 4-kinase type II beta) (PIP4KII-beta) (PtdIns(5)P-4-kinase isoform 2-beta)	Pip4k2b	NA	NA	NA	NA	NA	NA	NA	NA	NA	NA	NA	NA
Q80XI6	Q80XI6	Mitogen-activated protein kinase kinase kinase 11 (EC 2.7.11.25) (Mixed lineage kinase 3)	Map3k11	NA	NA	NA	NA	NA	NA	NA	NA	NA	NA	NA	NA
Q80XJ3	Q80XJ3	Tetratricopeptide repeat protein 28 (TPR repeat protein 28)	Ttc28	NA	NA	NA	NA	NA	NA	NA	NA	4.14295e+06	NA	930104	1.78433e+06
Q80XK6	Q80XK6	Autophagy-related protein 2 homolog B	Atg2b	NA	NA	NA	NA	1.21586e+06	1.47885e+06	902208	1.0281e+06	NA	NA	NA	NA
Q80XP8	Q80XP8	Protein FAM76B	Fam76b	NA	NA	NA	NA	1.2627e+06	637857	589804	769790	1.24286e+06	21053.6	869272	1.11389e+06
Q80XQ2	Q80XQ2	TBC1 domain family member 5	Tbc1d5	NA	NA	NA	NA	NA	NA	NA	NA	1.60918e+06	NA	1.20523e+06	922359
Q80Y44	Q80Y44	Probable ATP-dependent RNA helicase DDX10 (EC 3.6.4.13) (DEAD box protein 10)	Ddx10	NA	NA	NA	NA	1.16148e+07	1.1943e+07	4.6964e+06	5.2606e+06	NA	NA	NA	NA
Q80Y56	Q80Y56	Rabenosyn-5 (FYVE finger-containing Rab5 effector protein rabenosyn-5) (RAB effector RBSN) (Zinc finger FYVE domain-containing protein 20)	Rbsn	NA	NA	NA	NA	1.57723e+06	4.2186e+06	1.00307e+06	1407329	4.76139e+06	295810	4.65235e+06	2.47718e+06
Q80YR4-1	Q80YR4	E3 ubiquitin-protein ligase ZNF598 (EC 2.3.2.27) (Zinc finger protein 598)	Znf598	NA	NA	NA	NA	2045157	1.9908e+06	1.14383e+06	1.32061e+06	4.47719e+06	291941	3.30426e+06	3.75677e+06
Q80YR5	Q80YR5	Scaffold attachment factor B2 (SAF-B2)	Safb2	NA	NA	NA	NA	1.56313e+07	1.32569e+07	8.06472e+06	9.42162e+06	NA	NA	NA	NA
Q80ZJ8	Q80ZJ8	EF-hand calcium-binding domain-containing protein 4A (Calcium release-activated channel regulator 2B)	Cracr2b	NA	NA	NA	NA	454771	652628	233053	NA	NA	NA	NA	NA
Q80ZM8	Q80ZM8	Cardiolipin synthase (CMP-forming) (CLS) (EC 2.7.8.41)	Crls1	NA	NA	NA	NA	NA	NA	NA	NA	NA	NA	NA	NA
Q80ZW0	Q80ZW0	Serine/threonine-protein kinase 35 (Serine/threonine-protein kinase 35 L1) (EC 2.7.11.1)	Stk35	NA	NA	NA	NA	958385	499398	732587	797321	NA	NA	NA	NA
Q810A7-1	Q810A7	ATP-dependent RNA helicase DDX42 (EC 3.6.4.13) (DEAD box protein 42)	Ddx42	NA	NA	NA	NA	4.22649e+07	4.2733e+07	2.58484e+07	3.62783e+07	775091	NA	NA	742706
Q810B6-1	Q810B6	Rabankyrin-5 (Rank-5) (Ankyrin repeat and FYVE domain-containing protein 1) (Ankyrin repeats hooked to a zinc finger motif)	Ankfy1	NA	NA	NA	NA	NA	NA	NA	NA	NA	NA	NA	NA
Q810U3	Q810U3	Neurofascin	Nfasc	NA	NA	NA	NA	NA	121956008	11061137	NA	NA	NA	NA	NA
Q810V0	Q810V0	U3 small nucleolar ribonucleoprotein protein MPP10 (M phase phosphoprotein 10)	Mphosph10	NA	NA	NA	NA	1.13866e+07	1.3744e+07	9.82683e+06	9.28915e+06	NA	NA	NA	NA
Q811D0	Q811D0	Disks large homolog 1 (Embryo-dlg/synapse-associated protein 97) (E-dlg/SAP97) (Synapse-associated protein 97) (SAP-97) (SAP97)	Dlg1	NA	NA	NA	NA	358501	524992	232092	265790	NA	NA	NA	NA
Q811D2	Q811D2	Ankyrin repeat domain-containing protein 26	Ankrd26	NA	NA	NA	NA	NA	NA	NA	NA	NA	NA	NA	1.34637e+06
Q811L6	Q811L6	Microtubule-associated serine/threonine-protein kinase 4 (EC 2.7.11.1)	Mast4	NA	NA	NA	NA	867388	840990	689485	499955	1.50668e+06	71858.3	644804	550520
Q8BFQ4	Q8BFQ4	WD repeat-containing protein 82	Wdr82	NA	NA	NA	NA	NA	NA	NA	NA	1.91582e+06	154592	1.12988e+06	178512
Q8BFR5	Q8BFR5	Elongation factor Tu, mitochondrial	Tufm	6.65438e+06	2.10559e+07	1.67175e+07	1.93093e+07	8.49701e+07	1.26724e+08	4.76915e+07	6.0805e+07	9.73568e+07	1.78975e+07	1.88695e+08	9.47859e+07
Q8BFU2	Q8BFU2	Histone H2A type 3 (H2A-clustered histone 25)	H2ac25	1.65842e+07	9.39002e+07	1.18349e+08	4.47921e+07	NA	NA	NA	NA	NA	NA	NA	NA
Q8BFW7-1	Q8BFW7	Lipoma-preferred partner homolog	Lpp	NA	NA	NA	NA	2.87576e+07	4.25107e+07	1.29608e+07	1.81421e+07	3.30909e+08	5.58869e+07	1.29482e+08	1.3049e+08
Q8BFZ3	Q8BFZ3	Beta-actin-like protein 2 (Kappa-actin)	Actbl2	NA	NA	NA	NA	NA	NA	NA	NA	456392	268104	NA	899890
Q8BG05	Q8BG05	Heterogeneous nuclear ribonucleoprotein A3 (hnRNP A3)	Hnrnpa3	1.30269e+06	12920434	9.07641e+06	1.6294e+07	3.46812e+08	3.68653e+08	2.03504e+08	2.43932e+08	2.37514e+08	1.30238e+08	4.7937e+08	2.35988e+08
Q8BG05-2	Q8BG05	Heterogeneous nuclear ribonucleoprotein A3 (hnRNP A3)	Hnrnpa3	NA	NA	NA	NA	1.05248e+07	1.29069e+07	9900357	1.23265e+07	1.11251e+07	1.44931e+07	9.91828e+06	1.72708e+07
Q8BG32	Q8BG32	26S proteasome non-ATPase regulatory subunit 11 (26S proteasome regulatory subunit RPN6) (26S proteasome regulatory subunit S9) (26S proteasome regulatory subunit p44.5)	Psmd11	NA	NA	NA	NA	923858	434528	1.45238e+06	991334	1.00873e+06	1.11687e+06	NA	756092
Q8BG51	Q8BG51	Mitochondrial Rho GTPase 1 (MIRO-1) (EC 3.6.5.-) (Ras homolog gene family member T1)	Rhot1	NA	NA	NA	NA	NA	NA	NA	NA	NA	NA	1.79716e+06	NA
Q8BG67-1	Q8BG67	Protein EFR3 homolog A (Protein EFR3-like)	Efr3a	NA	NA	NA	NA	NA	NA	NA	NA	218782	194372	636900	211042
Q8BG79-1	Q8BG79	CWF19-like protein 2	Cwf19l2	NA	NA	NA	NA	332253	824519	109006	204718	3.40104e+06	NA	NA	405812
Q8BG80	Q8BG80	F-box only protein 46 (F-box only protein 34-like)	Fbxo46	NA	NA	NA	NA	44411472	40507200	34493120	40962348	NA	NA	NA	NA
Q8BG81	Q8BG81	Polymerase delta-interacting protein 3 (S6K1 Aly/REF-like target) (SKAR)	Poldip3	NA	138895	99337.6	127094	27731123	1.78577e+07	1.42e+07	2.30905e+07	8.22436e+06	1.34614e+06	1.5618e+07	8.49117e+06
Q8BGA5	Q8BGA5	KRR1 small subunit processome component homolog (HIV-1 Rev-binding protein 2 homolog) (KRR-R motif-containing protein 1)	Krr1	NA	NA	NA	NA	652560	688116	295612	300011	NA	NA	NA	NA
Q8BGA9	Q8BGA9	Mitochondrial inner membrane protein OXA1L (Oxidase assembly 1-like protein) (OXA1-like protein)	Oxa1l	222440	380592	253840	493845	NA	NA	NA	NA	NA	NA	NA	NA
Q8BGD9	Q8BGD9	Eukaryotic translation initiation factor 4B (eIF-4B)	Eif4b	NA	NA	NA	NA	16891547	2.81359e+07	1.25356e+07	1.77127e+07	2.09399e+07	1.95354e+06	9.62048e+06	9.87472e+06
Q8BGQ7	Q8BGQ7	Alanine--tRNA ligase, cytoplasmic (EC 6.1.1.7) (Alanyl-tRNA synthetase) (AlaRS) (Protein sticky) (Sti)	Aars1	145489	229926	174745	263678	757943	381616	391916	513376	5150323	384885	1.5463e+06	2.60889e+06
Q8BGS7	Q8BGS7	Choline/ethanolaminephosphotransferase 1 (mCEPT1) (EC 2.7.8.1) (EC 2.7.8.2) (1-alkenyl-2-acylglycerol choline phosphotransferase) (EC 2.7.8.22)	Cept1	NA	NA	NA	NA	4921310	4.6859e+06	2270430	3.64745e+06	NA	NA	NA	NA
Q8BGT6	Q8BGT6	MICAL-like protein 1 (Molecule interacting with Rab13) (MIRab13)	Micall1	NA	NA	NA	NA	1.66426e+06	2.73421e+06	939773	918017	NA	NA	NA	NA
Q8BGT7	Q8BGT7	Survival of motor neuron-related-splicing factor 30 (30 kDa splicing factor SMNrp) (SMN-related protein) (Survival motor neuron domain-containing protein 1)	Smndc1	NA	NA	NA	NA	NA	NA	525618	644144	NA	NA	NA	NA
Q8BGX0	Q8BGX0	E3 ubiquitin-protein ligase TRIM23 (EC 2.3.2.27) (ADP-ribosylation factor domain-containing protein 1) (GTP-binding protein ARD-1) (RING-type E3 ubiquitin transferase TRIM23) (Tripartite motif-containing protein 23)	Trim23	NA	NA	NA	NA	NA	NA	NA	NA	NA	NA	1.73969e+06	NA
Q8BGX2	Q8BGX2	Mitochondrial import inner membrane translocase subunit Tim29 (TIM29)	Timm29	NA	NA	NA	NA	NA	NA	NA	NA	189183	NA	466759	NA
Q8BGY2	Q8BGY2	Eukaryotic translation initiation factor 5A-2 (eIF-5A-2) (eIF-5A2) (Eukaryotic initiation factor 5A isoform 2)	Eif5a2	NA	NA	NA	NA	2.73728e+06	4514087	2.32475e+06	1.17795e+06	NA	NA	NA	NA
Q8BGZ7	Q8BGZ7	Keratin, type II cytoskeletal 75 (Cytokeratin-75) (CK-75) (Keratin-6 hair follicle) (mK6hf) (Keratin-75) (K75) (Type II keratin-K6hf) (Type-II keratin Kb18)	Krt75	NA	NA	NA	NA	NA	NA	NA	NA	1239912	NA	6.56412e+06	NA
Q8BH04	Q8BH04	Phosphoenolpyruvate carboxykinase [GTP], mitochondrial (PEPCK-M) (EC 4.1.1.32)	Pck2	NA	NA	NA	NA	2.46873e+06	3487945	777208	2.04906e+06	6.45803e+06	851009	1.01503e+07	3.10495e+06
Q8BH15	Q8BH15	CCR4-NOT transcription complex subunit 10	Cnot10	NA	NA	NA	NA	NA	NA	NA	NA	348920	189461	NA	261375
Q8BH35-1	Q8BH35	Complement component C8 beta chain (Complement component 8 subunit beta)	C8b	NA	NA	NA	NA	NA	NA	NA	NA	NA	581217	NA	NA
Q8BH43	Q8BH43	Actin-binding protein WASF2 (Protein WAVE-2) (Wiskott-Aldrich syndrome protein family member 2) (WASP family protein member 2)	Wasf2	NA	NA	NA	NA	942552	1575420	435288	1065954	16998086	1.11602e+06	1.04027e+07	1.02914e+07
Q8BH57	Q8BH57	WD repeat-containing protein 48 (USP1-associated factor 1)	Wdr48	NA	NA	NA	NA	NA	NA	NA	NA	3.4035e+06	102835	3.1041e+06	2.0958e+06
Q8BH59	Q8BH59	Electrogenic aspartate/glutamate antiporter SLC25A12, mitochondrial (Solute carrier family 25 member 12)	Slc25a12	NA	NA	NA	NA	6.0883e+06	3.92751e+06	1.87147e+06	2.77763e+06	7.12984e+06	1.02755e+06	2.57196e+07	7.01128e+06
Q8BH64	Q8BH64	EH domain-containing protein 2	Ehd2	NA	NA	NA	NA	4.56947e+06	9.04469e+06	3.47839e+06	4.57023e+06	1.11844e+07	4166465	1.48169e+07	4.99405e+06
Q8BH74	Q8BH74	Nuclear pore complex protein Nup107 (107 kDa nucleoporin) (Nucleoporin Nup107)	Nup107	NA	NA	NA	NA	912314	5.80914e+06	2.16223e+06	2.77805e+06	NA	NA	NA	NA
Q8BH95	Q8BH95	Enoyl-CoA hydratase, mitochondrial (mECH) (mECH1) (EC 4.2.1.17) (EC 5.3.3.8) (Enoyl-CoA hydratase 1) (ECHS1) (Short-chain enoyl-CoA hydratase) (SCEH)	Echs1	NA	NA	NA	NA	NA	NA	NA	NA	NA	NA	NA	NA
Q8BHB4	Q8BHB4	WD repeat-containing protein 3	Wdr3	NA	NA	NA	NA	NA	NA	NA	NA	NA	NA	1.43275e+06	NA
Q8BHD7	Q8BHD7	Polypyrimidine tract-binding protein 3 (Regulator of differentiation 1) (Rod1)	Ptbp3	NA	NA	NA	NA	1.30622e+07	1.38071e+07	1.16241e+07	1.55917e+07	4.05036e+06	1.03751e+06	1.77406e+06	4.01855e+06
Q8BHF7	Q8BHF7	CDP-diacylglycerol--glycerol-3-phosphate 3-phosphatidyltransferase, mitochondrial (EC 2.7.8.5) (Phosphatidylglycerophosphate synthase 1) (PGP synthase 1) (Silencer-associated factor)	Pgs1	NA	NA	NA	NA	6.26167e+06	7.00605e+06	2.96238e+06	2.07657e+06	1.91394e+06	184911	8.91742e+06	2.21338e+06
Q8BHJ9	Q8BHJ9	Pre-mRNA-splicing factor SLU7	Slu7	NA	NA	NA	NA	1.366e+06	926069	NA	251418	NA	NA	NA	NA
Q8BHK9	Q8BHK9	DNA excision repair protein ERCC-6-like (EC 3.6.4.12) (ATP-dependent helicase ERCC6-like)	Ercc6l	NA	NA	NA	NA	1.26623e+07	1.81932e+07	7.51826e+06	1.06135e+07	1165662	388310	449809	483955
Q8BHL4	Q8BHL4	Retinoic acid-induced protein 3 (G-protein coupled receptor family C group 5 member A) (Retinoic acid-induced gene 1 protein) (RAIG-1)	Gprc5a	NA	NA	NA	NA	2.08467e+06	3.96998e+06	1.26091e+06	1.35704e+06	1.09742e+06	495297	NA	445013
Q8BHN1	Q8BHN1	Gamma-taxilin (Factor inhibiting ATF4-mediated transcription) (FIAT) (Lipopolysaccharide-responsive gene protein)	Txlng	NA	NA	NA	NA	NA	NA	NA	NA	2.00084e+06	1.0352e+06	2.78827e+06	2.72751e+06
Q8BHS3	Q8BHS3	Pre-mRNA-splicing factor RBM22 (RNA-binding motif protein 22)	Rbm22	NA	NA	NA	NA	NA	NA	NA	NA	2229531	NA	NA	880760
Q8BHY2	Q8BHY2	Nucleolar complex protein 4 homolog (NOC4 protein homolog) (NOC4-like protein) (Nucleolar complex-associated protein 4-like protein)	Noc4l	NA	NA	NA	NA	3.1972e+06	3.45205e+06	1.00691e+06	2.23465e+06	764822	421020	1.92696e+06	3.35174e+06
Q8BHZ4	Q8BHZ4	Zinc finger protein 592 (Zfp-592)	Znf592	NA	NA	NA	NA	2.35081e+06	2.0725e+06	2.53971e+06	3.01775e+06	NA	NA	NA	NA
Q8BI72	Q8BI72	CDKN2A-interacting protein (Collaborator of ARF)	Cdkn2aip	NA	NA	NA	NA	9283024	7.28386e+06	5.26566e+06	5.59475e+06	NA	NA	NA	NA
Q8BIE6-1	Q8BIE6	FERM domain-containing protein 4A	Frmd4a	NA	NA	NA	NA	NA	557270	201670	265375	3152688	234808	1.32147e+06	2.06042e+06
Q8BIH0-1	Q8BIH0	Histone deacetylase complex subunit SAP130 (130 kDa Sin3-associated polypeptide) (Sin3-associated polypeptide p130)	Sap130	NA	NA	NA	NA	3.35191e+06	3.6976e+06	1.65862e+06	2.23494e+06	NA	NA	NA	NA
Q8BIJ6	Q8BIJ6	Isoleucine--tRNA ligase, mitochondrial (EC 6.1.1.5) (Isoleucyl-tRNA synthetase) (IleRS)	Iars2	NA	NA	NA	NA	2.17527e+06	5.61834e+06	1.34067e+06	1.09911e+06	4.54965e+06	232994	3.37543e+06	3.4315e+06
Q8BIQ5-1	Q8BIQ5	Cleavage stimulation factor subunit 2 (CF-1 64 kDa subunit) (Cleavage stimulation factor 64 kDa subunit) (CSTF 64 kDa subunit) (CstF-64)	Cstf2	NA	NA	NA	NA	6.07202e+06	6.86465e+06	3.88306e+06	3.57734e+06	1.95333e+06	NA	1.05739e+06	937223
Q8BJ05	Q8BJ05	Zinc finger CCCH domain-containing protein 14	Zc3h14	NA	NA	NA	NA	3.87098e+07	4.7218e+07	1.93235e+07	1.96503e+07	3.07766e+06	NA	2.30406e+06	3.25839e+06
Q8BJ71-1	Q8BJ71	Nuclear pore complex protein Nup93 (93 kDa nucleoporin) (CBP-interacting protein 4) (Nucleoporin Nup93)	Nup93	NA	NA	NA	NA	NA	NA	NA	NA	426405	136753	2.19018e+06	312297
Q8BJH1-1	Q8BJH1	Zinc finger C2HC domain-containing protein 1A	Zc2hc1a	NA	NA	NA	NA	NA	NA	NA	NA	NA	NA	NA	NA
Q8BJL0	Q8BJL0	SWI/SNF-related matrix-associated actin-dependent regulator of chromatin subfamily A-like protein 1 (EC 3.6.4.-) (HepA-related protein) (mharp) (Sucrose nonfermenting protein 2-like 1)	Smarcal1	NA	NA	NA	NA	NA	NA	NA	NA	670440	1.19207e+06	468403	379785
Q8BJM7-1	Q8BJM7	S-adenosyl-L-methionine-dependent tRNA 4-demethylwyosine synthase TYW1 (EC 4.1.3.44) (Radical S-adenosyl methionine and flavodoxin domain-containing protein 1) (tRNA wybutosine-synthesizing protein 1 homolog) (tRNA-yW-synthesizing protein)	Tyw1	NA	NA	NA	NA	343874	270175	NA	281140	NA	NA	NA	NA
Q8BJS8-1	Q8BJS8	Mdm2-binding protein (mMTBP)	Mtbp	NA	NA	NA	NA	236831	530300	NA	214682	NA	NA	NA	NA
Q8BJW6-1	Q8BJW6	Eukaryotic translation initiation factor 2A (eIF-2A) [Cleaved into: Eukaryotic translation initiation factor 2A, N-terminally processed]	Eif2a	NA	NA	NA	NA	1.30038e+06	1.28693e+06	818835	1.01287e+06	1.49628e+06	857609	391446	1188866
Q8BJY1	Q8BJY1	26S proteasome non-ATPase regulatory subunit 5 (26S protease subunit S5 basic) (26S proteasome subunit S5B)	Psmd5	NA	NA	NA	NA	1.45743e+06	2.46588e+06	834602	1.48485e+06	NA	NA	NA	NA
Q8BK63-1	Q8BK63	Casein kinase I isoform alpha (CKI-alpha) (EC 2.7.11.1) (CK1)	Csnk1a1	NA	NA	NA	NA	7.01406e+06	7.51299e+06	1.61169e+06	5.47967e+06	NA	NA	NA	NA
Q8BK63-2	Q8BK63	Casein kinase I isoform alpha (CKI-alpha) (EC 2.7.11.1) (CK1)	Csnk1a1	NA	NA	NA	NA	NA	NA	NA	NA	1.15424e+08	1.00422e+07	1.34929e+08	6.15428e+07
Q8BKC5-1	Q8BKC5	Importin-5 (Imp5) (Importin subunit beta-3) (Karyopherin beta-3) (Ran-binding protein 5) (RanBP5)	Ipo5	NA	NA	NA	NA	264421	701018	325048	NA	NA	NA	NA	NA
Q8BKI2	Q8BKI2	Trinucleotide repeat-containing gene 6B protein	Tnrc6b	NA	NA	NA	NA	1.06292e+07	1.58393e+07	4.19232e+06	7.18973e+06	4.16935e+06	NA	2.5469e+06	2308417
Q8BKS9	Q8BKS9	Pumilio homolog 3	Pum3	NA	NA	NA	NA	568945	1.50498e+06	336375	415460	NA	NA	NA	NA
Q8BKT3	Q8BKT3	Intron Large complex component GCFC2 (GC-rich sequence DNA-binding factor) (GC-rich sequence DNA-binding factor 2) (Transcription factor 9) (TCF-9)	Gcfc2	NA	NA	NA	NA	NA	NA	NA	NA	826849	NA	NA	117512
Q8BKX1	Q8BKX1	Brain-specific angiogenesis inhibitor 1-associated protein 2 (BAI-associated protein 2) (BAI1-associated protein 2) (Insulin receptor substrate protein of 53 kDa) (IRSp53) (Insulin receptor substrate p53) (Insulin receptor tyrosine kinase 53 kDa substrate)	Baiap2	NA	NA	NA	NA	2.22336e+06	4.71043e+06	1.45951e+06	2.0138e+06	4.10774e+08	1.03017e+08	3.00022e+08	1.53575e+08
Q8BKZ9	Q8BKZ9	Pyruvate dehydrogenase protein X component, mitochondrial (Dihydrolipoamide dehydrogenase-binding protein of pyruvate dehydrogenase complex) (Lipoyl-containing pyruvate dehydrogenase complex component X)	Pdhx	NA	NA	NA	NA	NA	NA	NA	NA	NA	NA	NA	NA
Q8BL06	Q8BL06	Inactive ubiquitin carboxyl-terminal hydrolase 54 (Inactive ubiquitin-specific peptidase 54)	Usp54	NA	NA	NA	NA	367772	371293	NA	174128	1.76991e+06	NA	711290	625471
Q8BL66	Q8BL66	Early endosome antigen 1	Eea1	NA	NA	NA	NA	239762	811287	218875	295892	NA	NA	NA	NA
Q8BLI0-1	Q8BLI0	ADAMTS-like protein 1 (ADAMTSL-1) (Punctin-1)	Adamtsl1	NA	NA	NA	NA	NA	NA	NA	NA	NA	NA	NA	NA
Q8BM55	Q8BM55	Transmembrane protein 214	Tmem214	NA	NA	NA	NA	797093	NA	300884	211957	NA	NA	NA	NA
Q8BMA5	Q8BMA5	Protein NPAT	Npat	NA	NA	NA	NA	1.88298e+06	2.21726e+06	1.36917e+06	1.47063e+06	NA	NA	NA	NA
Q8BMA6	Q8BMA6	Signal recognition particle subunit SRP68 (SRP68) (Signal recognition particle 68 kDa protein)	Srp68	NA	NA	NA	NA	NA	NA	NA	NA	NA	NA	NA	NA
Q8BMB0-1	Q8BMB0	BRCA2-interacting transcriptional repressor EMSY	Emsy	NA	NA	NA	NA	17129525	1.70582e+07	9.67991e+06	1.52858e+07	NA	NA	NA	NA
Q8BMD8	Q8BMD8	Mitochondrial adenyl nucleotide antiporter SLC25A24 (Small calcium-binding mitochondrial carrier protein 1) (SCaMC-1) (Solute carrier family 25 member 24)	Slc25a24	NA	NA	NA	NA	1.21765e+07	2.00047e+07	8.75728e+06	1.15169e+07	5.85728e+06	NA	NA	3.48459e+06
Q8BMF4	Q8BMF4	Dihydrolipoyllysine-residue acetyltransferase component of pyruvate dehydrogenase complex, mitochondrial (EC 2.3.1.12) (Dihydrolipoamide acetyltransferase component of pyruvate dehydrogenase complex) (Pyruvate dehydrogenase complex component E2) (PDC-E2) (PDCE2)	Dlat	NA	NA	NA	NA	NA	NA	NA	NA	NA	NA	NA	NA
Q8BMG7	Q8BMG7	Rab3 GTPase-activating protein non-catalytic subunit (Rab3 GTPase-activating protein 150 kDa subunit) (Rab3-GAP p150) (Rab3-GAP150) (Rab3-GAP regulatory subunit)	Rab3gap2	NA	NA	NA	NA	2.99517e+06	4.25065e+06	1.66593e+06	1.90186e+06	831352	NA	950950	227575
Q8BMI4	Q8BMI4	Flap endonuclease GEN homolog 1 (EC 3.1.-.-)	Gen1	NA	NA	NA	NA	818944	1757745	509850	1.11212e+06	701614	NA	NA	436268
Q8BMK4	Q8BMK4	Cytoskeleton-associated protein 4 (63-kDa cytoskeleton-linking membrane protein) (Climp-63) (p63)	Ckap4	NA	NA	NA	NA	1.19665e+07	1.335e+07	3.22078e+06	5.78696e+06	NA	NA	NA	NA
Q8BMP6	Q8BMP6	Golgi resident protein GCP60 (Acyl-CoA-binding domain-containing protein 3) (Golgi complex-associated protein 1) (GOCAP1) (Golgi phosphoprotein 1) (GOLPH1) (PBR- and PKA-associated protein 7) (Peripheral benzodiazepine receptor-associated protein PAP7)	Acbd3	NA	NA	NA	NA	374748	420533	322278	213456	NA	NA	NA	NA
Q8BMS1	Q8BMS1	Trifunctional enzyme subunit alpha, mitochondrial (Monolysocardiolipin acyltransferase) (EC 2.3.1.-) (TP-alpha) [Includes: Long-chain enoyl-CoA hydratase (EC 4.2.1.17); Long chain 3-hydroxyacyl-CoA dehydrogenase (EC 1.1.1.211)]	Hadha	4.30456e+06	6.6702e+06	2.92759e+06	6.17918e+06	3.49026e+07	5.14799e+07	2.34104e+07	2.57722e+07	2.37245e+07	3.20046e+06	7.88496e+07	2.15209e+07
Q8BP40	Q8BP40	Lysophosphatidic acid phosphatase type 6 (EC 3.1.3.2) (Acid phosphatase 6, lysophosphatidic) (Acid phosphatase-like protein 1) (PACPL1)	Acp6	NA	NA	NA	NA	1.56591e+06	1.72205e+06	1.17411e+06	1892905	1.9277e+06	43827752	6392396	3.88893e+06
Q8BP47	Q8BP47	Asparagine--tRNA ligase, cytoplasmic (EC 6.1.1.22) (Asparaginyl-tRNA synthetase) (AsnRS) (Asparaginyl-tRNA synthetase 1)	NARS1	NA	NA	NA	NA	1.60027e+06	3.37947e+06	1.30432e+06	1.47271e+06	NA	NA	NA	NA
Q8BP48	Q8BP48	Methionine aminopeptidase 1 (MAP 1) (MetAP 1) (EC 3.4.11.18) (Peptidase M 1)	Metap1	NA	NA	NA	NA	NA	NA	NA	NA	NA	NA	NA	NA
Q8BP67	Q8BP67	60S ribosomal protein L24	Rpl24	NA	NA	NA	NA	3.35443e+07	3.07574e+07	3.10954e+07	3.31074e+07	6.4371e+06	1.24761e+06	5.39292e+06	4.46646e+06
Q8BPZ8-1	Q8BPZ8	BRCA1-A complex subunit Abraxas 1 (Coiled-coil domain-containing protein 98) (Protein FAM175A)	Abraxas1	NA	NA	NA	NA	436345	416857	265558	282257	NA	NA	NA	NA
Q8BQ30	Q8BQ30	Phostensin (Protein phosphatase 1 F-actin cytoskeleton-targeting subunit) (Protein phosphatase 1 regulatory subunit 18)	Ppp1r18	283310	358967	323486	445448	5.8183e+07	6.49088e+07	3.74602e+07	4.59914e+07	1.9202e+07	7.56663e+06	1.59389e+07	1.82268e+07
Q8BQP8	Q8BQP8	Rab11 family-interacting protein 4 (FIP4-Rab11) (Rab11-FIP4) (mRab11-FIP4A)	Rab11fip4	NA	NA	NA	NA	NA	NA	NA	NA	NA	NA	NA	NA
Q8BRF7	Q8BRF7	Sec1 family domain-containing protein 1 (Syntaxin-binding protein 1-like 2)	Scfd1	NA	NA	NA	NA	2901365	3.75792e+06	1.67093e+06	2.62271e+06	756369	NA	NA	339659
Q8BRV5	Q8BRV5	Uncharacterized protein KIAA1671	Kiaa1671	NA	NA	NA	NA	NA	NA	NA	NA	NA	NA	NA	NA
Q8BSD5	Q8BSD5	SH2 domain-containing adapter protein E	She	NA	NA	NA	NA	NA	NA	NA	NA	NA	NA	NA	NA
Q8BSF4	Q8BSF4	Phosphatidylserine decarboxylase proenzyme, mitochondrial (EC 4.1.1.65) [Cleaved into: Phosphatidylserine decarboxylase beta chain; Phosphatidylserine decarboxylase alpha chain]	Pisd	NA	NA	NA	NA	NA	NA	NA	NA	NA	NA	NA	NA
Q8BT07-1	Q8BT07	Centrosomal protein of 55 kDa (Cep55)	Cep55	NA	NA	NA	NA	580994	891935	497579	737493	2.22965e+07	3.2786e+06	1.99057e+07	1.15455e+07
Q8BT60	Q8BT60	Copine-3 (Copine III)	Cpne3	NA	NA	NA	NA	437015	176486	307236	968516	NA	328544	3.61739e+06	938738
Q8BTI8	Q8BTI8	Serine/arginine repetitive matrix protein 2	Srrm2	1.5524e+08	8.25861e+06	5.23896e+06	8.01077e+06	8.70001e+07	4.45183e+08	6.33911e+07	7.72763e+07	1.33546e+08	6.26761e+06	7.2152e+08	18570246
Q8BTM8	Q8BTM8	Filamin-A (FLN-A) (Actin-binding protein 280) (ABP-280) (Alpha-filamin) (Endothelial actin-binding protein) (Filamin-1) (Non-muscle filamin)	Flna	NA	1.19695e+06	871897	1.42444e+06	1.14625e+08	1.30022e+08	8.25272e+07	8.75819e+07	2.92803e+07	3.65528e+06	1.38196e+08	2.59261e+07
Q8BTV2	Q8BTV2	Cleavage and polyadenylation specificity factor subunit 7	Cpsf7	NA	NA	NA	NA	891350	NA	414537	552013	NA	2.10242e+06	1.67097e+06	NA
Q8BTX9	Q8BTX9	Inactive hydroxysteroid dehydrogenase-like protein 1	Hsdl1	NA	NA	NA	NA	NA	NA	NA	NA	NA	219330	1.34767e+06	NA
Q8BTY2	Q8BTY2	Sodium bicarbonate cotransporter 3 (Solute carrier family 4 member 7)	Slc4a7	NA	NA	NA	NA	722622	1.06613e+06	438640	303184	NA	NA	NA	NA
Q8BU11	Q8BU11	TOX high mobility group box family member 4 (Epidermal Langerhans cell protein LCP1)	Tox4	NA	NA	NA	NA	38122327	3.35582e+07	2.22656e+07	2.77396e+07	NA	NA	NA	NA
Q8BU31	Q8BU31	Ras-related protein Rap-2c (EC 3.6.5.2)	Rap2c	NA	NA	NA	NA	NA	NA	NA	NA	653772	NA	8516572	NA
Q8BU88	Q8BU88	39S ribosomal protein L22, mitochondrial (L22mt) (MRP-L22)	Mrpl22	NA	NA	NA	NA	NA	NA	NA	NA	NA	NA	NA	NA
Q8BUH8	Q8BUH8	Sentrin-specific protease 7 (EC 3.4.22.-) (SUMO-1-specific protease 2) (Sentrin/SUMO-specific protease SENP7)	Senp7	NA	NA	NA	NA	4.45696e+06	2.02635e+06	1.34267e+06	1.82897e+06	NA	NA	NA	NA
Q8BVE3	Q8BVE3	V-type proton ATPase subunit H (V-ATPase subunit H) (Vacuolar proton pump subunit H)	Atp6v1h	NA	NA	NA	NA	NA	5.23472e+06	1.0519e+06	NA	2446073	244355	NA	1.42834e+06
Q8BVE8-1	Q8BVE8	Histone-lysine N-methyltransferase NSD2 (EC 2.1.1.357) (Multiple myeloma SET domain-containing protein) (MMSET) (Nuclear SET domain-containing protein 2) (Wolf-Hirschhorn syndrome candidate 1 protein homolog)	Nsd2	NA	NA	NA	NA	NA	NA	NA	NA	NA	NA	NA	NA
Q8BVK9	Q8BVK9	Sp110 nuclear body protein (Intracellular pathogen resistance protein 1)	Sp110	NA	NA	NA	NA	474344	NA	NA	NA	NA	NA	NA	NA
Q8BVY0	Q8BVY0	Ribosomal L1 domain-containing protein 1	Rsl1d1	27462.1	505246	181778	329198	7.59288e+07	1.17372e+08	5.90512e+07	6.83134e+07	4.51238e+06	248536	5.1013e+06	3.6504e+06
Q8BWF2	Q8BWF2	GTPase IMAP family member 5 (GTPase of the immunity-associated protein 5) (Immunity-associated nucleotide 4-like 1 protein) (Immunity-associated protein 3)	Gimap5	NA	NA	NA	NA	NA	NA	NA	NA	NA	NA	NA	NA
Q8BWL5	Q8BWL5	RNA-binding motif, single-stranded-interacting protein 3	Rbms3	NA	NA	NA	NA	1.49773e+06	812260	603060	1.49036e+06	517676	NA	1.67032e+06	714254
Q8BWM0	Q8BWM0	Prostaglandin E synthase 2 (EC 5.3.99.3) (GATE-binding factor 1) (GBF-1) (Microsomal prostaglandin E synthase 2) (mPGES-2) [Cleaved into: Prostaglandin E synthase 2 truncated form]	Ptges2	NA	NA	NA	NA	NA	NA	NA	NA	764478	NA	915882	1.24252e+06
Q8BWN8	Q8BWN8	Peroxisomal succinyl-coenzyme A thioesterase (EC 3.1.2.3) (Acyl-coenzyme A thioesterase 4) (Acyl-CoA thioesterase 4) (PTE-2b) (Peroxisomal acyl coenzyme A thioester hydrolase Ib) (Peroxisomal long-chain acyl-CoA thioesterase Ib) (PTE-Ib)	Acot4	1.26694e+06	NA	NA	NA	NA	NA	NA	NA	NA	NA	NA	NA
Q8BWT1	Q8BWT1	3-ketoacyl-CoA thiolase, mitochondrial (EC 2.3.1.16) (Acetyl-CoA acetyltransferase) (EC 2.3.1.9) (Acetyl-CoA acyltransferase) (Acyl-CoA hydrolase, mitochondrial) (EC 3.1.2.-, EC 3.1.2.1, EC 3.1.2.2) (Beta-ketothiolase) (Mitochondrial 3-oxoacyl-CoA thiolase)	Acaa2	NA	NA	NA	NA	2.78931e+06	8.12664e+06	563513	803526	3.2828e+06	1.38787e+06	4.64365e+06	2.64819e+06
Q8BWW4	Q8BWW4	La-related protein 4 (La ribonucleoprotein domain family member 4)	Larp4	NA	NA	NA	NA	2.95464e+07	2.99165e+07	1.89011e+07	2.22697e+07	5.79767e+06	227091	1.10317e+07	4.08992e+06
Q8BX02	Q8BX02	KN motif and ankyrin repeat domain-containing protein 2 (Ankyrin repeat domain-containing protein 25)	Kank2	NA	NA	NA	NA	791387	3.32236e+06	871390	1.1735e+06	NA	NA	NA	NA
Q8BX17	Q8BX17	Gem-associated protein 5 (Gemin5)	Gemin5	NA	NA	NA	NA	NA	NA	1.10446e+06	868444	NA	NA	NA	NA
Q8BXZ1	Q8BXZ1	Protein disulfide-isomerase TMX3 (EC 5.3.4.1) (Thioredoxin domain-containing protein 10) (Thioredoxin-related transmembrane protein 3)	Tmx3	NA	NA	NA	NA	614470	NA	NA	742690	NA	NA	NA	NA
Q8BY02	Q8BY02	NF-kappa-B-repressing factor (NFkB-repressing factor) (Transcription factor NRF)	Nkrf	NA	NA	NA	NA	2.94252e+06	2726612	1875079	1.92893e+06	NA	NA	NA	NA
Q8BYJ6	Q8BYJ6	TBC1 domain family member 4 (Akt substrate of 160 kDa) (AS160)	Tbc1d4	NA	NA	NA	NA	4.88405e+06	3.22595e+06	1.06151e+06	NA	NA	NA	NA	NA
Q8BYL4	Q8BYL4	Tyrosine--tRNA ligase, mitochondrial (EC 6.1.1.1) (Tyrosyl-tRNA synthetase) (TyrRS)	Yars2	NA	NA	NA	NA	335959	353400	227111	262279	NA	NA	NA	NA
Q8BYR5-1	Q8BYR5	Calcium-dependent secretion activator 2 (Calcium-dependent activator protein for secretion 2) (CAPS-2)	Cadps2	NA	NA	NA	NA	5.63138e+06	4.752e+06	3892537	4.55614e+06	NA	NA	NA	NA
Q8BYU6	Q8BYU6	Torsin-1A-interacting protein 2	Tor1aip2	NA	NA	NA	NA	3.3531e+06	3.72507e+06	1.1872e+06	1.25941e+06	3.70339e+06	NA	5.0096e+06	3.44435e+06
Q8BYZ1	Q8BYZ1	ABI gene family member 3 (New molecule including SH3) (Nesh)	Abi3	NA	NA	NA	NA	NA	NA	NA	NA	3.27516e+06	NA	819915	1.44748e+06
Q8BZ47	Q8BZ47	Zinc finger protein 609	Znf609	NA	NA	NA	NA	NA	NA	NA	NA	NA	NA	NA	NA
Q8BZ71	Q8BZ71	SH3 and cysteine-rich domain-containing protein 3	Stac3	NA	NA	NA	NA	NA	NA	NA	NA	1832930	NA	NA	660082
Q8BZH4	Q8BZH4	Pogo transposable element with ZNF domain	Pogz	NA	NA	NA	NA	1.21587e+07	1.07757e+07	1.16509e+07	1.36395e+07	NA	NA	NA	NA
Q8BZI0-1	Q8BZI0	Actin filament-associated protein 1-like 1 (AFAP1-like protein 1)	Afap1l1	NA	NA	NA	NA	3.97634e+07	3.11342e+07	1.12145e+07	1.85984e+07	1.4379e+07	1.35146e+06	1.26496e+07	9.93647e+06
Q8BZR9	Q8BZR9	Nuclear cap-binding protein subunit 3	Ncbp3	NA	NA	NA	NA	218444	439577	28816.7	100368	NA	NA	NA	NA
Q8C079	Q8C079	Striatin-interacting protein 1 (Protein FAM40A)	Strip1	NA	NA	NA	NA	7.19015e+06	8.43685e+06	6.22391e+06	6.85925e+06	NA	NA	NA	NA
Q8C080	Q8C080	Sorting nexin-16	Snx16	NA	NA	NA	NA	79949.9	425647	NA	117050	NA	NA	NA	NA
Q8C092	Q8C092	Transcription initiation factor TFIID subunit 5 (Transcription initiation factor TFIID 100 kDa subunit) (TAF(II)100) (TAFII-100) (TAFII100)	Taf5	NA	NA	NA	NA	5.21355e+06	3.14231e+06	4445598	5.38541e+06	NA	NA	NA	NA
Q8C0C0	Q8C0C0	Zinc fingers and homeoboxes protein 2 (Alpha-fetoprotein regulator 1) (AFP regulator 1) (Regulator of AFP) (Zinc finger and homeodomain protein 2)	Zhx2	NA	NA	NA	NA	1.45897e+06	948332	606290	833194	NA	NA	NA	NA
Q8C0C7	Q8C0C7	Phenylalanine--tRNA ligase alpha subunit (EC 6.1.1.20) (Phenylalanyl-tRNA synthetase alpha subunit) (PheRS)	Farsa	NA	NA	NA	NA	NA	NA	NA	NA	NA	NA	NA	NA
Q8C0D4	Q8C0D4	Rho GTPase-activating protein 12 (Rho-type GTPase-activating protein 12)	Arhgap12	NA	NA	NA	NA	NA	NA	NA	NA	4.72745e+06	746347	2.29522e+06	901028
Q8C0I1	Q8C0I1	Alkyldihydroxyacetonephosphate synthase, peroxisomal (Alkyl-DHAP synthase) (EC 2.5.1.26) (Alkylglycerone-phosphate synthase)	Agps	NA	NA	NA	NA	3.43181e+06	8.4357e+06	1.96886e+06	3.08283e+06	3.02836e+06	623036	7.78561e+06	3.31256e+06
Q8C0T5-1	Q8C0T5	Signal-induced proliferation-associated 1-like protein 1 (SIPA1-like protein 1)	Sipa1l1	NA	NA	NA	NA	7.55061e+06	1.23002e+07	5.90949e+06	5.01458e+06	1.6859e+07	1.61127e+06	1.18614e+07	9.8031e+06
Q8C0V9-1	Q8C0V9	FERM domain-containing protein 6	Frmd6	NA	NA	NA	NA	NA	NA	NA	NA	NA	NA	323188	NA
Q8C160	Q8C160	Mesothelin-like protein (Pre-pro-megakaryocyte-potentiating-factor-like)	Mslnl	NA	NA	NA	NA	NA	NA	NA	NA	1.06895e+06	NA	NA	552206
Q8C166	Q8C166	Copine-1 (Copine I)	Cpne1	NA	NA	NA	NA	1.89662e+07	2.56604e+06	1.54768e+07	1.62023e+07	2.89598e+06	1.96801e+06	1.74628e+07	1.32745e+07
Q8C180	Q8C180	Fibroblast growth factor receptor substrate 2 (FGFR substrate 2) (FGFR-signaling adaptor SNT) (FRS2-alpha) (Suc1-associated neurotrophic factor target 1) (SNT-1)	Frs2	NA	NA	NA	NA	NA	NA	NA	NA	NA	NA	NA	NA
Q8C181	Q8C181	Muscleblind-like protein 2	Mbnl2	NA	NA	NA	NA	6.99212e+06	9.43004e+06	5.33044e+06	6177734	1.77401e+06	249463	NA	800179
Q8C1B1-1	Q8C1B1	Calmodulin-regulated spectrin-associated protein 2 (Calmodulin-regulated spectrin-associated protein 1-like protein 1)	Camsap2	NA	NA	NA	NA	NA	NA	NA	NA	3.40135e+06	535637	5.28967e+06	2.56588e+06
Q8C1D8	Q8C1D8	Protein IWS1 homolog (IWS1-like protein)	Iws1	NA	NA	NA	NA	1.11256e+06	1.44062e+06	659776	1064148	NA	NA	NA	NA
Q8C1E1	Q8C1E1	BPI fold-containing family B member 2 (Bactericidal/permeability-increasing protein-like 1)	Bpifb2	NA	NA	NA	NA	NA	NA	NA	NA	3249361	416965	260546	NA
Q8C1E7	Q8C1E7	Ion channel TACAN (Transmembrane protein 120A)	Tmem120a	NA	NA	NA	NA	2.13628e+06	3.78379e+06	1262552	1.94936e+06	1.53671e+06	309461	538618	1.24285e+06
Q8C262	Q8C262	Interferon-inducible GTPase 5 (EC 3.6.5.-) (Immunity-related GTPase cinema 1)	Irgc	NA	NA	NA	NA	6258853	11924989	4.43099e+06	5656971	NA	NA	NA	NA
Q8C2E7	Q8C2E7	WASH complex subunit 5 (WASH complex subunit strumpellin)	Washc5	NA	NA	NA	NA	4.18691e+06	2492571	2.59337e+06	3.54115e+06	2.98158e+07	4.28077e+06	6.00025e+07	2.44905e+07
Q8C2Q3	Q8C2Q3	RNA-binding protein 14 (RNA-binding motif protein 14)	Rbm14	NA	NA	NA	NA	1.33774e+07	1.80016e+07	8.00355e+06	7.45182e+06	3.94918e+07	1.05709e+07	4.77771e+07	4.12319e+07
Q8C3X8	Q8C3X8	Lipase maturation factor 2 (Transmembrane protein 112B) (Transmembrane protein 153)	Lmf2	NA	NA	NA	NA	NA	NA	NA	NA	NA	NA	1.12216e+06	NA
Q8C4A5	Q8C4A5	Putative Polycomb group protein ASXL3 (Additional sex combs-like protein 3)	Asxl3	NA	NA	NA	NA	2.50531e+06	2327224	1.4951e+06	1.89147e+06	NA	NA	NA	NA
Q8C4J7	Q8C4J7	Transducin beta-like protein 3	Tbl3	NA	NA	NA	NA	257546	397615	169784	235017	1.05085e+06	NA	NA	628335
Q8C522	Q8C522	Endonuclease domain-containing 1 protein (EC 3.1.30.-)	Endod1	NA	NA	NA	NA	2.19477e+06	1.31327e+06	1.04379e+06	1.3334e+06	NA	49545.8	436878	202629
Q8C5L3-1	Q8C5L3	CCR4-NOT transcription complex subunit 2 (CCR4-associated factor 2)	Cnot2	NA	NA	NA	NA	2.93164e+06	2.11561e+06	1.4325e+06	2.33246e+06	2.74045e+06	1.15797e+06	2.39958e+06	1.9158e+06
Q8C5L7	Q8C5L7	RNA-binding protein 34 (RNA-binding motif protein 34)	Rbm34	NA	NA	NA	NA	1.65365e+06	3.28292e+06	1.63238e+06	1.5413e+06	NA	NA	NA	NA
Q8C5N3-1	Q8C5N3	Pre-mRNA-splicing factor CWC22 homolog (Nucampholin homolog)	Cwc22	NA	NA	NA	NA	NA	NA	NA	NA	210644	132244	NA	197319
Q8C627-1	Q8C627	Protein FAM221B	Fam221b	NA	NA	NA	NA	19409076	18310774	12327438	13736540	NA	NA	NA	NA
Q8C6G8	Q8C6G8	WD repeat-containing protein 26	Wdr26	NA	NA	NA	NA	NA	NA	NA	NA	1011770	NA	1072036	1.19054e+06
Q8C7Q4-1	Q8C7Q4	RNA-binding protein 4 (Lark homolog) (mLark) (RNA-binding motif protein 4) (RNA-binding motif protein 4a)	Rbm4	NA	NA	NA	NA	799472	957163	458340	447250	1.15867e+07	153248	6.86573e+06	9.27024e+06
Q8C7U1	Q8C7U1	NEDD4-binding protein 3 (N4BP3)	N4bp3	NA	NA	NA	NA	NA	NA	NA	NA	2.49848e+07	3.00789e+06	1.66998e+07	2.04767e+07
Q8C854-4	Q8C854	Myelin expression factor 2 (MEF-2) (MyEF-2)	Myef2	1.27546e+06	3.90364e+06	2.953e+06	742579	3.17797e+07	4.09071e+07	1.78901e+07	1.74987e+07	1.82736e+07	4.23502e+06	2.21496e+07	1.64387e+07
Q8C8U0-3	Q8C8U0	Liprin-beta-1 (Protein tyrosine phosphatase receptor type f polypeptide-interacting protein-binding protein 1) (PTPRF-interacting protein-binding protein 1)	Ppfibp1	NA	NA	NA	NA	1.84892e+06	3.40273e+06	1.69411e+06	1.91973e+06	NA	NA	NA	NA
Q8C9B9	Q8C9B9	Death-inducer obliterator 1 (DIO-1) (Death-associated transcription factor 1) (DATF-1)	Dido1	NA	NA	NA	NA	2.19845e+07	1.59104e+07	1.44195e+07	1.79115e+07	NA	NA	NA	NA
Q8CAF4	Q8CAF4	NHS-like protein 1	Nhsl1	NA	NA	NA	NA	7.84181e+06	1.49652e+07	1.80941e+06	5.4354e+06	9.83131e+06	1.06135e+06	1083474	4.4332e+06
Q8CAQ8-1	Q8CAQ8	MICOS complex subunit Mic60 (Mitochondrial inner membrane protein) (Mitofilin)	Immt	NA	127713	99951.1	150536	1.78386e+06	2355946	1.7412e+06	2.14221e+06	1.96528e+06	276138	5.52517e+06	3.53501e+06
Q8CAS9	Q8CAS9	Protein mono-ADP-ribosyltransferase PARP9 (EC 2.4.2.-) (ADP-ribosyltransferase diphtheria toxin-like 9) (ARTD9) (B aggressive lymphoma protein homolog) (Poly [ADP-ribose] polymerase 9) (PARP-9)	Parp9	NA	NA	NA	NA	6.25768e+06	4.1136e+06	4.56102e+06	5.53651e+06	2.99392e+06	1.85592e+06	1.09147e+07	6.68443e+06
Q8CBB9	Q8CBB9	S-adenosylmethionine-dependent nucleotide dehydratase RSAD2 (SAND) (EC 4.2.-.-) (Radical S-adenosyl methionine domain-containing protein 2) (Virus inhibitory protein, endoplasmic reticulum-associated, interferon-inducible) (Viperin)	Rsad2	NA	NA	NA	NA	2.37474e+06	1062046	1.97049e+06	601843	999928	NA	3.97506e+06	2.18949e+06
Q8CBF3	Q8CBF3	Ephrin type-B receptor 1 (EC 2.7.10.1)	Ephb1	NA	NA	NA	NA	531924495	394064228	4.44098e+07	143871624	NA	NA	NA	NA
Q8CBW3-1	Q8CBW3	Abl interactor 1 (Abelson interactor 1) (Abi-1) (Ablphilin-1) (Eps8 SH3 domain-binding protein) (Eps8-binding protein) (Spectrin SH3 domain-binding protein 1) (e3B1)	Abi1	NA	NA	NA	NA	2.91977e+06	3.41941e+06	1.64903e+06	1.75084e+06	56556323	3.27207e+06	3.56274e+07	2.5452e+07
Q8CC35	Q8CC35	Synaptopodin	Synpo	NA	NA	NA	NA	1.41396e+08	1.83191e+08	8.79875e+07	1.22052e+08	3.3223e+07	9.38324e+06	2.69702e+07	4.61227e+07
Q8CC35-2	Q8CC35	Synaptopodin	Synpo	NA	NA	NA	NA	26923623	3.07658e+07	2.05052e+07	2.4827e+07	6.94073e+06	2.34612e+06	1.02682e+07	8.00954e+06
Q8CCF0	Q8CCF0	U4/U6 small nuclear ribonucleoprotein Prp31 (Pre-mRNA-processing factor 31) (U4/U6 snRNP 61 kDa protein) (Protein 61K)	Prpf31	NA	NA	NA	NA	1.19286e+06	1.71385e+06	NA	371619	NA	NA	NA	NA
Q8CCJ9-1	Q8CCJ9	PHD finger protein 20-like protein 1	Phf20l1	NA	NA	NA	NA	NA	336253	203759	326647	NA	NA	NA	NA
Q8CCN5-1	Q8CCN5	BCAS3 microtubule associated cell migration factor (Breast carcinoma-amplified sequence 3 homolog) (K20D4) (Protein rudhira)	Bcas3	NA	NA	NA	NA	NA	NA	NA	NA	1.90872e+06	280958	1.02906e+06	612317
Q8CCS6	Q8CCS6	Polyadenylate-binding protein 2 (PABP-2) (Poly(A)-binding protein 2) (Nuclear poly(A)-binding protein 1) (Poly(A)-binding protein II) (PABII) (Polyadenylate-binding nuclear protein 1)	Pabpn1	NA	1.35727e+06	687094	NA	NA	NA	NA	NA	NA	NA	NA	NA
Q8CD15	Q8CD15	Ribosomal oxygenase 2 (Bifunctional lysine-specific demethylase and histidyl-hydroxylase MINA) (EC 1.14.11.79) (Histone lysine demethylase MINA) (MYC-induced nuclear antigen)	Riox2	NA	NA	NA	NA	NA	NA	NA	NA	1.53267e+06	NA	1.03618e+06	537804
Q8CDD9	Q8CDD9	Ligand-dependent nuclear receptor-interacting factor 1	Lrif1	NA	NA	NA	NA	1.05356e+06	996843	679016	714637	NA	NA	NA	NA
Q8CDG3	Q8CDG3	Deubiquitinating protein VCPIP1 (EC 3.4.19.12) (Valosin-containing protein p97/p47 complex-interacting protein 1) (Valosin-containing protein p97/p47 complex-interacting protein p135) (VCP/p47 complex-interacting 135-kDa protein)	Vcpip1	NA	NA	NA	NA	4.56694e+07	6.08291e+07	2.68791e+07	3.22083e+07	5.033e+06	NA	3.48472e+06	2.8479e+06
Q8CDN6	Q8CDN6	Thioredoxin-like protein 1 (32 kDa thioredoxin-related protein)	Txnl1	NA	NA	NA	NA	1.0841e+06	1.67506e+06	1123093	1.19551e+06	30637767	774971	1.56368e+07	1.1236e+07
Q8CEC0	Q8CEC0	Nuclear pore complex protein Nup88 (88 kDa nucleoporin) (Nucleoporin Nup88)	Nup88	NA	NA	NA	NA	2.93892e+07	3.34317e+07	2.20061e+07	2.42741e+07	1260180	NA	348904	1.17062e+06
Q8CEE0-1	Q8CEE0	Centrosomal protein of 57 kDa (Cep57) (Testis-specific protein 57) (Translokin)	Cep57	NA	NA	NA	NA	NA	NA	NA	NA	1346425	NA	816627	733406
Q8CF66	Q8CF66	Ragulator complex protein LAMTOR4 (Late endosomal/lysosomal adaptor and MAPK and MTOR activator 4) [Cleaved into: Ragulator complex protein LAMTOR4, N-terminally processed]	Lamtor4	NA	NA	NA	NA	NA	NA	NA	NA	NA	NA	4102937	583228
Q8CFE6	Q8CFE6	Sodium-coupled neutral amino acid symporter 2 (Amino acid transporter A2) (Solute carrier family 38 member 2) (System A amino acid transporter 2) (System A transporter 1) (System N amino acid transporter 2)	Slc38a2	NA	NA	NA	NA	2.8729e+06	4.33119e+06	NA	1.79187e+06	NA	NA	NA	NA
Q8CFI7	Q8CFI7	DNA-directed RNA polymerase II subunit RPB2 (EC 2.7.7.6) (DNA-directed RNA polymerase II 140 kDa polypeptide) (DNA-directed RNA polymerase II subunit B) (RNA polymerase II subunit 2) (RNA polymerase II subunit B2)	Polr2b	NA	NA	NA	NA	2.61682e+06	1.90714e+06	1.43589e+06	1.71658e+06	482982	NA	NA	535438
Q8CFQ3	Q8CFQ3	RNA helicase aquarius (EC 3.6.4.13) (Intron-binding protein of 160 kDa)	Aqr	NA	NA	NA	NA	NA	NA	NA	NA	NA	160544	837460	NA
Q8CG79	Q8CG79	Apoptosis-stimulating of p53 protein 2 (Tumor suppressor p53-binding protein 2) (53BP2) (p53-binding protein 2) (p53BP2)	Tp53bp2	NA	NA	NA	NA	NA	NA	NA	NA	721134	NA	NA	191750
Q8CGA0	Q8CGA0	Protein phosphatase 1F (EC 3.1.3.16) (Ca(2+)/calmodulin-dependent protein kinase phosphatase) (CaM-kinase phosphatase) (CaMKPase)	Ppm1f	NA	NA	NA	NA	NA	NA	NA	NA	NA	NA	NA	NA
Q8CGB3-1	Q8CGB3	Uveal autoantigen with coiled-coil domains and ankyrin repeats (Nuclear membrane-binding protein) (Nucling)	Uaca	NA	NA	NA	NA	334719	557879	207667	NA	2.77198e+06	575931	351057	2.87325e+06
Q8CGB6	Q8CGB6	Tensin-2 (EC 3.1.3.48) (C1 domain-containing phosphatase and tensin homolog) (C1-TEN) (Tensin-like C1 domain-containing phosphatase)	Tns2	NA	NA	NA	NA	3.57839e+06	2.58621e+06	2.12052e+06	3.09326e+06	1.61004e+07	415021	1.12771e+07	1.18016e+07
Q8CGC6	Q8CGC6	RNA-binding protein 28 (RNA-binding motif protein 28)	Rbm28	NA	NA	NA	NA	4.27141e+06	1.61786e+07	2.6343e+06	2.64059e+06	NA	NA	3.54887e+06	NA
Q8CGC7	Q8CGC7	Bifunctional glutamate/proline--tRNA ligase (Bifunctional aminoacyl-tRNA synthetase) [Includes: Glutamate--tRNA ligase (EC 6.1.1.17) (Glutamyl-tRNA synthetase) (GluRS); Proline--tRNA ligase (EC 6.1.1.15) (Prolyl-tRNA synthetase) (ProRS)]	Eprs1	NA	NA	NA	NA	1.24913e+07	9.97715e+06	9.22723e+06	5.85348e+06	2.70839e+06	51188.1	3.27969e+06	1.47016e+06
Q8CGE9	Q8CGE9	Regulator of G-protein signaling 12 (RGS12)	Rgs12	NA	NA	NA	NA	NA	NA	NA	NA	1.48953e+06	NA	1.93943e+06	720797
Q8CGF1	Q8CGF1	Rho GTPase-activating protein 29 (Rho-type GTPase-activating protein 29)	Arhgap29	NA	NA	NA	NA	895435	1.0943e+06	733043	838404	8.26673e+06	2.06761e+06	5.83362e+06	5.17166e+06
Q8CGF7-1	Q8CGF7	Transcription elongation regulator 1 (Formin-binding protein 28) (FBP 28) (TATA box-binding protein-associated factor 2S) (Transcription factor CA150) (p144)	Tcerg1	NA	NA	NA	NA	1.92916e+07	1.52482e+07	8.75201e+06	1.0631e+07	NA	NA	NA	NA
Q8CGK3	Q8CGK3	Lon protease homolog, mitochondrial (EC 3.4.21.53) (Lon protease-like protein) (LONP) (Mitochondrial ATP-dependent protease Lon) (Serine protease 15)	Lonp1	NA	NA	NA	NA	NA	NA	NA	NA	1434131	337143	4.66287e+07	1.67862e+06
Q8CGP2	Q8CGP2	Histone H2B type 1-P	Hist1h2bp	NA	NA	NA	NA	1.94555e+06	2724901	844286	675222	6.03795e+08	6.07309e+08	2.90352e+08	2.2706e+08
Q8CGY8-1	Q8CGY8	UDP-N-acetylglucosamine--peptide N-acetylglucosaminyltransferase 110 kDa subunit (EC 2.4.1.255) (O-GlcNAc transferase subunit p110) (O-linked N-acetylglucosamine transferase 110 kDa subunit) (OGT)	Ogt	NA	NA	NA	NA	1.14661e+06	3.64258e+06	3.01236e+06	3.84715e+06	NA	137237	127198	158640
Q8CGZ0	Q8CGZ0	Calcium homeostasis endoplasmic reticulum protein (SR-related CTD-associated factor 6)	Cherp	NA	NA	NA	NA	5.26516e+07	7.68017e+07	3.04631e+07	4.2377e+07	507544	72136.2	2.46314e+06	706942
Q8CH18-1	Q8CH18	Cell division cycle and apoptosis regulator protein 1 (Cell cycle and apoptosis regulatory protein 1) (CARP-1)	Ccar1	NA	NA	NA	NA	9.43165e+06	8.82611e+06	4.59333e+06	7329128	NA	NA	NA	NA
Q8CH25-1	Q8CH25	SAFB-like transcription modulator (Modulator of estrogen-induced transcription) (SAF-like transcription modulator)	Sltm	NA	NA	NA	NA	8.28315e+07	7.60566e+07	4.39135e+07	5.24927e+07	2.39227e+06	NA	1.81526e+06	2.27003e+06
Q8CH77	Q8CH77	Neuron navigator 1 (Pore membrane and/or filament-interacting-like protein 3)	Nav1	NA	NA	NA	NA	335277	456216	160689	253274	NA	NA	NA	NA
Q8CHC4	Q8CHC4	Synaptojanin-1 (EC 3.1.3.36) (Synaptic inositol 1,4,5-trisphosphate 5-phosphatase 1)	Synj1	NA	NA	NA	NA	1.23872e+06	1.61946e+06	627316	710180	NA	NA	NA	NA
Q8CHI8	Q8CHI8	E1A-binding protein p400 (EC 3.6.4.-) (Domino homolog) (mDomino) (p400 kDa SWI2/SNF2-related protein)	Ep400	NA	NA	NA	NA	2.54181e+06	2.78577e+06	1.54915e+06	1.77857e+06	NA	NA	NA	NA
Q8CHP5-1	Q8CHP5	Partner of Y14 and mago (PYM homolog 1 exon junction complex-associated factor) (Protein wibg homolog)	Pym1	NA	NA	NA	NA	4222572	3222673	2871154	3.06472e+06	NA	NA	NA	NA
Q8CHY6	Q8CHY6	Transcriptional repressor p66 alpha (GATA zinc finger domain-containing protein 2A)	Gatad2a	NA	NA	NA	NA	9.25793e+06	1.45338e+07	7.90823e+06	1.0743e+07	NA	NA	NA	NA
Q8CI08-1	Q8CI08	SLAIN motif-containing protein 2	Slain2	NA	NA	NA	NA	3.20751e+06	3.50402e+06	1.09519e+06	1.94122e+06	1.06068e+06	398030	700348	941183
Q8CI11	Q8CI11	Guanine nucleotide-binding protein-like 3 (Nucleolar GTP-binding protein 3) (Nucleostemin)	Gnl3	NA	NA	NA	NA	329416	414024	172557	198517	NA	NA	NA	NA
Q8CI51	Q8CI51	PDZ and LIM domain protein 5 (Enigma homolog) (Enigma-like PDZ and LIM domains protein)	Pdlim5	NA	NA	NA	NA	5.60932e+06	6.8957e+06	4.17428e+06	4.88715e+06	2.82171e+07	799723	2.63543e+07	1.94046e+07
Q8CIB5	Q8CIB5	Fermitin family homolog 2 (Kindlin-2) (Pleckstrin homology domain-containing family C member 1)	Fermt2	NA	NA	NA	NA	381585	809814	NA	NA	NA	NA	NA	NA
Q8CID0	Q8CID0	Cysteine-rich protein 2-binding protein (CSRP2-binding protein) (ADA2A-containing complex subunit 2) (ATAC2) (CRP2-binding partner) (CRP2BP) (Lysine acetyltransferase 14)	Kat14	NA	NA	NA	NA	649613	938314	616745	667450	NA	NA	NA	NA
Q8CIE6	Q8CIE6	Coatomer subunit alpha (Alpha-coat protein) (Alpha-COP) [Cleaved into: Xenin (Xenopsin-related peptide); Proxenin]	Copa	NA	NA	NA	NA	3.44862e+06	6.09219e+06	1.32951e+06	3833267	NA	NA	1.57153e+06	843663
Q8CIL4	Q8CIL4	Uncharacterized protein C1orf131 homolog		NA	NA	NA	NA	1.53129e+06	1.10145e+06	559076	NA	NA	NA	NA	NA
Q8CIN4	Q8CIN4	Serine/threonine-protein kinase PAK 2 (EC 2.7.11.1) (Gamma-PAK) (p21-activated kinase 2) (PAK-2) [Cleaved into: PAK-2p27; PAK-2p34]	Pak2	NA	NA	NA	NA	2.07282e+07	29844598	1.31e+07	1.77729e+07	1.38495e+07	978190	1.42107e+07	6071418
Q8CJ67-1	Q8CJ67	Double-stranded RNA-binding protein Staufen homolog 2	Stau2	NA	NA	NA	NA	2.60525e+06	3.39296e+06	2.32788e+06	2.34704e+06	NA	NA	NA	NA
Q8CJF7	Q8CJF7	Protein ELYS (Embryonic large molecule derived from yolk sac) (Protein MEL-28) (Putative AT-hook-containing transcription factor 1)	Ahctf1	NA	NA	NA	NA	3.58763e+07	4.20051e+07	2.15505e+07	2.80865e+07	NA	NA	NA	NA
Q8CJG0	Q8CJG0	Protein argonaute-2 (Argonaute2) (mAgo2) (EC 3.1.26.n2) (Argonaute RISC catalytic component 2) (Eukaryotic translation initiation factor 2C 2) (eIF-2C 2) (eIF2C 2) (Piwi/argonaute family protein meIF2C2) (Protein slicer)	Ago2	NA	NA	NA	NA	1.26188e+07	8.95598e+06	7.83383e+06	7.88445e+06	1.75173e+06	3.73595e+06	5.51135e+06	5.32106e+06
Q8JZM7	Q8JZM7	Parafibromin (Cell division cycle protein 73 homolog) (Hyperparathyroidism 2 protein homolog)	Cdc73	NA	NA	NA	NA	1.05458e+07	8.28426e+06	5.12716e+06	6.10395e+06	1.20834e+06	NA	1.48772e+06	630096
Q8JZN7	Q8JZN7	Mitochondrial Rho GTPase 2 (MIRO-2) (EC 3.6.5.-) (Ras homolog gene family member T2)	Rhot2	NA	NA	NA	NA	NA	NA	NA	NA	NA	70470.8	NA	671352
Q8JZQ9	Q8JZQ9	Eukaryotic translation initiation factor 3 subunit B (eIF3b) (Eukaryotic translation initiation factor 3 subunit 9) (eIF-3-eta) (eIF3 p116)	Eif3b	NA	NA	NA	NA	NA	NA	NA	NA	102000	NA	1.53161e+06	241106
Q8JZS6	Q8JZS6	NEDD4-binding protein 2-like 2 (Phosphonoformate immuno-associated protein 5 homolog)	N4bp2l2	NA	NA	NA	NA	NA	NA	NA	NA	NA	NA	NA	NA
Q8JZU2	Q8JZU2	Tricarboxylate transport protein, mitochondrial (Citrate transport protein) (CTP) (Solute carrier family 25 member 1) (Tricarboxylate carrier protein)	Slc25a1	NA	NA	NA	NA	45645.5	113842	NA	41644.4	1.41231e+06	NA	NA	1.07007e+06
Q8JZW5	Q8JZW5	SH2 domain-containing protein 5	Sh2d5	NA	NA	NA	NA	NA	NA	NA	NA	NA	NA	NA	NA
Q8JZX4	Q8JZX4	Splicing factor 45 (45 kDa-splicing factor) (RNA-binding motif protein 17)	Rbm17	NA	NA	NA	NA	1.00933e+08	1.1276e+08	4.55997e+07	6.7822e+07	171490	NA	1.06314e+06	137527
Q8JZZ7	Q8JZZ7	Adhesion G protein-coupled receptor L2 (Calcium-independent alpha-latrotoxin receptor 2) (CIRL-2) (Latrophilin-2)	Adgrl2	NA	NA	NA	NA	NA	NA	NA	NA	2.00589e+06	NA	1.35086e+06	NA
Q8K009	Q8K009	Mitochondrial 10-formyltetrahydrofolate dehydrogenase (Mitochondrial 10-FTHFDH) (mtFDH) (EC 1.5.1.6) (Aldehyde dehydrogenase family 1 member L2)	Aldh1l2	NA	NA	NA	NA	715932	701774	332202	393745	502234	294273	NA	381805
Q8K012	Q8K012	Formin-binding protein 1-like (Transducer of Cdc42-dependent actin assembly protein 1) (Toca-1)	Fnbp1l	NA	NA	NA	NA	NA	NA	NA	NA	967462	250686	NA	327709
Q8K019-1	Q8K019	Bcl-2-associated transcription factor 1 (Btf)	Bclaf1	NA	NA	NA	NA	4.35728e+07	3.30157e+08	2.28752e+07	6.28576e+07	NA	NA	NA	NA
Q8K078	Q8K078	Solute carrier organic anion transporter family member 4A1 (Organic anion-transporting polypeptide E) (OATP-E) (Sodium-independent organic anion transporter E) (Solute carrier family 21 member 12)	Slco4a1	NA	NA	NA	NA	1.79903e+06	2.49285e+06	1.85296e+06	1.66921e+06	NA	NA	NA	NA
Q8K0D5	Q8K0D5	Elongation factor G, mitochondrial (EF-Gmt) (Elongation factor G 1, mitochondrial) (mEF-G 1) (Elongation factor G1)	Gfm1	NA	NA	NA	NA	4.45239e+06	6.14053e+06	2.92251e+06	3.02968e+06	630726	NA	1.48431e+07	4.61221e+06
Q8K0H5	Q8K0H5	Transcription initiation factor TFIID subunit 10 (Transcription initiation factor TFIID 30 kDa subunit) (TAF(II)30) (TAFII-30) (TAFII30) (mTAFII30)	Taf10	NA	NA	NA	NA	NA	NA	NA	NA	NA	NA	NA	NA
Q8K0L9	Q8K0L9	Zinc finger and BTB domain-containing protein 20 (BTB/POZ domain zinc finger factor HOF) (Zinc finger protein 288)	Zbtb20	NA	NA	NA	NA	4.72965e+06	4.86214e+06	3.11818e+06	4.32811e+06	732848	340112	NA	997084
Q8K0T0	Q8K0T0	Reticulon-1 (Neuroendocrine-specific protein)	Rtn1	NA	NA	NA	NA	NA	NA	NA	NA	NA	698720	4.15429e+06	760633
Q8K1A6	Q8K1A6	Coiled-coil and C2 domain-containing protein 1A (Five prime repressor element under dual repression-binding protein 1) (FRE under dual repression-binding protein 1) (Freud-1)	Cc2d1a	NA	NA	NA	NA	1.068e+06	877880	713361	862254	3.28439e+06	291060	1.15313e+06	2.28196e+06
Q8K1E0-1	Q8K1E0	Syntaxin-5	Stx5	NA	NA	NA	NA	3.44622e+06	5.98184e+06	1.2117e+06	3.51767e+06	NA	NA	NA	NA
Q8K1H1	Q8K1H1	Tudor domain-containing protein 7 (PCTAIRE2-binding protein) (Tudor repeat associator with PCTAIRE-2) (Trap)	Tdrd7	NA	NA	NA	NA	NA	NA	NA	NA	1.51773e+06	287257	NA	822284
Q8K1N2	Q8K1N2	Pleckstrin homology-like domain family B member 2 (Protein LL5-beta)	Phldb2	NA	NA	NA	NA	2.49133e+06	1.22804e+07	899751	2.15505e+06	3.38258e+07	1.78646e+06	1.8589e+07	1.13708e+07
Q8K1N4-1	Q8K1N4	Spermatogenesis-associated serine-rich protein 2 (Serine-rich spermatocytes and round spermatid 59 kDa protein) (p59scr)	Spats2	NA	NA	NA	NA	754412	489856	637667	819414	NA	NA	NA	NA
Q8K1S2	Q8K1S2	Netrin receptor UNC5D (Protein unc-5 homolog 4) (Protein unc-5 homolog D)	Unc5d	NA	NA	NA	NA	NA	NA	NA	NA	NA	NA	13295559	486855
Q8K1X1	Q8K1X1	WD repeat-containing protein 11 (Bromodomain and WD repeat-containing protein 2)	Wdr11	NA	NA	NA	NA	297287	397432	159679	322596	705724	NA	581049	503648
Q8K202	Q8K202	DNA-directed RNA polymerase I subunit RPA49 (RNA polymerase I subunit A49) (DNA-directed RNA polymerase I subunit E) (RNA polymerase I-associated factor 1) (RNA polymerase I-associated factor 53)	Polr1e	NA	NA	NA	NA	3.4938e+06	3.8787e+06	2845550	3.01982e+06	NA	NA	NA	NA
Q8K224	Q8K224	RNA cytidine acetyltransferase (EC 2.3.1.-) (18S rRNA cytosine acetyltransferase) (N-acetyltransferase 10)	Nat10	NA	NA	NA	NA	9.69887e+08	9.46617e+08	7.96788e+08	9.94178e+08	6.05746e+06	1.51878e+06	1.00764e+07	5.27997e+06
Q8K297	Q8K297	Procollagen galactosyltransferase 1 (EC 2.4.1.50) (Collagen beta(1-O)galactosyltransferase 1) (Glycosyltransferase 25 family member 1) (Hydroxylysine galactosyltransferase 1)	Colgalt1	NA	NA	NA	NA	1.00627e+06	2.32443e+06	1.02214e+06	1.07538e+06	1.17721e+06	596994	2.39482e+06	210161
Q8K298	Q8K298	Anillin	Anln	NA	NA	NA	NA	NA	NA	NA	NA	NA	NA	NA	NA
Q8K2D3	Q8K2D3	Enhancer of mRNA-decapping protein 3 (YjeF domain-containing protein 1)	Edc3	NA	NA	NA	NA	346207	495378	293029	459167	661952	NA	479592	1.03371e+06
Q8K2F8	Q8K2F8	Protein LSM14 homolog A (Protein FAM61A) (RNA-associated protein 55A) (mRAP55A)	Lsm14a	NA	NA	NA	NA	812901	795586	559327	726401	NA	NA	NA	NA
Q8K2K6-1	Q8K2K6	Arf-GAP domain and FG repeat-containing protein 1 (HIV-1 Rev-binding protein homolog) (Nucleoporin-like protein RIP)	Agfg1	NA	NA	NA	NA	7.46424e+06	1.44204e+07	4.07462e+06	6.35784e+06	17500355	2322188	7.57075e+06	2483440
Q8K2T8	Q8K2T8	RNA polymerase II-associated factor 1 homolog	Paf1	NA	NA	NA	NA	900646	1.35809e+06	467053	645867	103237	138779	NA	141141
Q8K2V1-1	Q8K2V1	Serine/threonine-protein phosphatase 4 regulatory subunit 1	Ppp4r1	NA	NA	NA	NA	NA	NA	NA	NA	2.36499e+06	2252004	2.82064e+06	3.10203e+06
Q8K2Y0-1	Q8K2Y0	ORC ubiquitin ligase 1 (OBI1) (EC 2.3.2.27) (RING finger protein 219)	Obi1	NA	NA	NA	NA	NA	NA	NA	NA	923909	NA	861506	344586
Q8K301	Q8K301	Probable ATP-dependent RNA helicase DDX52 (EC 3.6.4.13) (ATP-dependent RNA helicase ROK1-like) (DEAD box protein 52)	Ddx52	42751.5	125886	56573	95284.1	NA	NA	NA	NA	3.98501e+06	1.207e+06	1.42005e+06	2.13449e+06
Q8K310	Q8K310	Matrin-3	Matr3	NA	NA	NA	NA	9.75406e+07	1.05358e+08	4.71218e+07	6.74861e+07	1.16232e+07	2.06474e+06	1.78434e+07	1.03065e+07
Q8K327	Q8K327	Chromosome alignment-maintaining phosphoprotein 1 (Zinc finger protein 828)	Champ1	NA	NA	NA	NA	1.34971e+08	1.80801e+08	5.84661e+07	9.73567e+07	NA	NA	NA	NA
Q8K363	Q8K363	ATP-dependent RNA helicase DDX18 (EC 3.6.4.13) (DEAD box protein 18)	Ddx18	NA	NA	NA	NA	6.20476e+06	6.18037e+06	3.86059e+06	3121198	1.19572e+06	NA	NA	2266132
Q8K371	Q8K371	Angiomotin-like protein 2	Amotl2	NA	NA	NA	NA	NA	NA	NA	NA	1.29817e+06	712386	1.43145e+06	1.17686e+06
Q8K3A9	Q8K3A9	7SK snRNA methylphosphate capping enzyme (MePCE) (EC 2.1.1.-)	Mepce	NA	NA	NA	NA	337232	257621	197972	221050	NA	NA	NA	NA
Q8K3W3	Q8K3W3	Protein CASC3 (Cancer susceptibility candidate gene 3 protein homolog) (Metastatic lymph node gene 51 protein homolog) (MLN 51 homolog) (Protein barentsz) (Btz) (mBtz)	Casc3	NA	NA	NA	NA	NA	NA	NA	NA	463758	184994	NA	168112
Q8K3Z9	Q8K3Z9	Nuclear envelope pore membrane protein POM 121 (Nucleoporin Nup121) (Pore membrane protein of 121 kDa)	Pom121	NA	NA	NA	NA	3.09317e+07	3.85555e+07	1.83977e+07	2.1452e+07	NA	NA	NA	NA
Q8K411-1	Q8K411	Presequence protease, mitochondrial (EC 3.4.24.-) (Pitrilysin metalloproteinase 1)	Pitrm1	NA	NA	NA	NA	360149	304257	464290	800120	830008	76240.1	710878	1.46757e+06
Q8K482	Q8K482	EMILIN-2 (Basilin) (Elastin microfibril interface-located protein 2) (Elastin microfibril interfacer 2)	Emilin2	NA	NA	NA	NA	NA	NA	NA	NA	NA	NA	731589	NA
Q8K4B0	Q8K4B0	Metastasis-associated protein MTA1	Mta1	NA	NA	NA	NA	1.42115e+07	2.13344e+07	9.54891e+06	1.19357e+07	NA	NA	NA	NA
Q8K4G5	Q8K4G5	Actin-binding LIM protein 1 (abLIM-1) (Actin-binding LIM protein family member 1)	Ablim1	NA	NA	NA	NA	5.419e+06	1.27026e+07	5.52509e+06	6.60174e+06	2.42814e+07	2.09101e+06	6.75699e+06	9.56727e+06
Q8K4L0	Q8K4L0	ATP-dependent RNA helicase DDX54 (EC 3.6.4.13) (DEAD box protein 54)	Ddx54	NA	NA	NA	NA	260227	NA	NA	NA	930557	NA	NA	48188.9
Q8K4L3-3	Q8K4L3	Supervillin (Archvillin) (p205/p250)	Svil	NA	NA	NA	NA	1.82426e+08	2.16273e+08	9.91081e+07	1.3636e+08	4.331e+07	1.11451e+07	7.84046e+07	5.86619e+07
Q8K4P0	Q8K4P0	pre-mRNA 3' end processing protein WDR33 (WD repeat-containing protein 33) (WD repeat-containing protein of 146 kDa)	Wdr33	NA	NA	NA	NA	524520	1.46145e+06	481270	1.91782e+06	NA	NA	NA	NA
Q8K4X7	Q8K4X7	1-acyl-sn-glycerol-3-phosphate acyltransferase delta (EC 2.3.1.51) (1-acylglycerol-3-phosphate O-acyltransferase 4) (1-AGP acyltransferase 4) (1-AGPAT 4) (Lysophosphatidic acid acyltransferase delta) (LPAAT-delta)	Agpat4	NA	NA	NA	NA	NA	NA	NA	NA	367355	59305.1	180979	249070
Q8K4Z5	Q8K4Z5	Splicing factor 3A subunit 1 (SF3a120)	Sf3a1	NA	NA	NA	NA	6.36994e+07	5.83328e+07	3.1114e+07	4.52113e+07	NA	NA	NA	NA
Q8QZS1	Q8QZS1	3-hydroxyisobutyryl-CoA hydrolase, mitochondrial (EC 3.1.2.4) (3-hydroxyisobutyryl-coenzyme A hydrolase) (HIB-CoA hydrolase) (HIBYL-CoA-H)	Hibch	NA	NA	NA	NA	830283	814235	487158	776874	NA	118537	116486	120507
Q8QZT1	Q8QZT1	Acetyl-CoA acetyltransferase, mitochondrial (EC 2.3.1.9) (Acetoacetyl-CoA thiolase)	Acat1	9648539	9.43542e+06	4814795	7.13828e+06	3.08388e+07	5.70212e+07	1.86467e+07	1.96189e+07	2.72136e+07	1.14003e+07	3.98333e+07	1.87803e+07
Q8QZV7	Q8QZV7	Integrator complex subunit 13 (Cell cycle regulator Mat89Bb homolog) (Protein asunder homolog) (Spermatogenesis-associated protein 30)	IntS13	NA	NA	NA	NA	1691786	1.99496e+06	980971	1.95415e+06	NA	NA	NA	NA
Q8R050	Q8R050	Eukaryotic peptide chain release factor GTP-binding subunit ERF3A (Eukaryotic peptide chain release factor subunit 3a) (eRF3a) (G1 to S phase transition protein 1 homolog)	Gspt1	NA	NA	NA	NA	970615	984808	769802	1.10364e+06	NA	NA	NA	NA
Q8R081	Q8R081	Heterogeneous nuclear ribonucleoprotein L (hnRNP L)	Hnrnpl	2.08281e+06	1.86343e+07	1.72061e+07	1.80429e+07	1.19298e+08	1.15032e+08	9.63369e+07	1.13751e+08	3.94197e+07	1.49604e+07	6.52605e+07	6.0961e+07
Q8R0A0	Q8R0A0	General transcription factor IIF subunit 2 (Transcription initiation factor IIF subunit beta) (TFIIF-beta)	Gtf2f2	NA	NA	NA	NA	NA	NA	NA	NA	NA	NA	NA	NA
Q8R0G9	Q8R0G9	Nuclear pore complex protein Nup133 (133 kDa nucleoporin) (Nucleoporin Nup133)	Nup133	NA	NA	NA	NA	1.39138e+06	1.61863e+06	1.02981e+06	1.01773e+06	NA	NA	NA	NA
Q8R0K4	Q8R0K4	Coiled-coil domain-containing protein 137	Ccdc137	NA	NA	NA	NA	NA	586459	242322	637318	NA	NA	NA	NA
Q8R0K9	Q8R0K9	Transcription factor E2F4 (E2F-4)	E2f4	NA	NA	NA	NA	4.16334e+06	5.51787e+06	3.05306e+06	3.51567e+06	NA	NA	NA	NA
Q8R0L9	Q8R0L9	Transcriptional adapter 3 (ADA3 homolog) (mADA3) (Transcriptional adapter 3-like) (ADA3-like protein)	Tada3	NA	NA	NA	NA	NA	NA	NA	NA	1.5003e+06	NA	7.88513e+06	NA
Q8R0X7	Q8R0X7	Sphingosine-1-phosphate lyase 1 (S1PL) (SP-lyase 1) (SPL 1) (mSPL) (EC 4.1.2.27) (Sphingosine-1-phosphate aldolase)	Sgpl1	NA	NA	NA	NA	NA	NA	NA	NA	3.13013e+06	2.0163e+06	3.83285e+06	3.40422e+06
Q8R149	Q8R149	BUD13 homolog	Bud13	NA	NA	NA	NA	2.60691e+06	1.93496e+06	615093	277487	NA	NA	NA	NA
Q8R180	Q8R180	ERO1-like protein alpha (ERO1-L) (ERO1-L-alpha) (EC 1.8.4.-) (Endoplasmic reticulum oxidoreductase alpha) (Endoplasmic reticulum oxidoreductin-1-like protein) (Oxidoreductin-1-L-alpha)	Ero1a	NA	NA	NA	NA	NA	NA	NA	NA	248097	NA	964735	163731
Q8R1B4	Q8R1B4	Eukaryotic translation initiation factor 3 subunit C (eIF3c) (Eukaryotic translation initiation factor 3 subunit 8) (eIF3 p110)	Eif3c	NA	NA	NA	NA	2.51796e+07	3.77643e+07	5.7451e+06	1.87879e+07	2035536	NA	908538	1.62291e+06
Q8R1F1	Q8R1F1	Protein Niban 2 (Meg-3) (Niban-like protein 1) (Protein FAM129B)	Niban2	NA	NA	NA	NA	5.44473e+06	3.53722e+06	2.75343e+06	4.08544e+06	698475	125728	10019329	2.20873e+06
Q8R1M2	Q8R1M2	Histone H2A.J (H2a/j)	H2aj	NA	NA	NA	NA	137683513	2.55717e+08	9.14791e+07	7.53647e+07	NA	NA	NA	NA
Q8R1N0	Q8R1N0	Zinc finger protein 830 (Coiled-coil domain-containing protein 16) (Ovus mutant candidate gene 1 protein)	Znf830	NA	NA	NA	NA	3358178	2.95466e+06	1.85238e+06	2.53612e+06	NA	NA	NA	NA
Q8R1Q8	Q8R1Q8	Cytoplasmic dynein 1 light intermediate chain 1 (Dynein light chain A) (DLC-A) (Dynein light intermediate chain 1, cytosolic)	Dync1li1	NA	NA	NA	NA	517566	716186	271091	306271	NA	NA	NA	NA
Q8R1S4-1	Q8R1S4	Protein MTSS 1 (Metastasis suppressor protein 1) (Missing in metastasis protein)	Mtss1	NA	NA	NA	NA	NA	NA	NA	NA	259519	273408	480507	NA
Q8R2K4-1	Q8R2K4	TAF6-like RNA polymerase II p300/CBP-associated factor-associated factor 65 kDa subunit 6L (TAF6L) (PCAF-associated factor 65-alpha) (PAF65-alpha)	Taf6l	NA	NA	NA	NA	NA	397889	335494	419057	NA	NA	NA	NA
Q8R2M2	Q8R2M2	Deoxynucleotidyltransferase terminal-interacting protein 2	Dnttip2	NA	NA	NA	NA	7.83624e+07	8.97217e+07	3.09832e+07	4.83452e+07	NA	NA	NA	NA
Q8R2Q4	Q8R2Q4	Ribosome-releasing factor 2, mitochondrial (RRF2mt) (Elongation factor G 2, mitochondrial) (EF-G2mt) (mEF-G 2)	Gfm2	NA	NA	NA	NA	NA	NA	NA	NA	NA	NA	NA	NA
Q8R2Q8	Q8R2Q8	Bone marrow stromal antigen 2 (BST-2) (HM1.24 antigen) (CD antigen CD317)	Bst2	NA	NA	NA	NA	205886	490113	257258	345746	NA	NA	NA	NA
Q8R2T8	Q8R2T8	General transcription factor 3C polypeptide 5 (TF3C-epsilon) (Transcription factor IIIC 63 kDa subunit) (TFIIIC 63 kDa subunit) (TFIIIC63) (Transcription factor IIIC subunit epsilon)	Gtf3c5	NA	NA	NA	NA	1117767	1.25146e+06	935163	1.14879e+06	NA	NA	NA	NA
Q8R2Y2-1	Q8R2Y2	Cell surface glycoprotein MUC18 (Gicerin) (Melanoma cell adhesion molecule) (Melanoma-associated antigen MUC18) (CD antigen CD146)	Mcam	NA	NA	NA	NA	6.81781e+06	1.27645e+07	3.31513e+06	3.49354e+06	400558	177355	2.20743e+06	711764
Q8R326	Q8R326	Paraspeckle component 1 (Paraspeckle protein 1) (mPSP1)	Pspc1	NA	NA	NA	NA	6.88902e+07	8.30638e+07	4.16057e+07	5.86877e+07	1.57802e+07	3.62099e+06	2.17203e+07	9.71081e+06
Q8R344	Q8R344	Coiled-coil domain-containing protein 12	Ccdc12	NA	NA	NA	NA	5.62079e+06	4.44171e+06	3.01937e+06	2.93991e+06	3.2799e+07	965233	5.38058e+06	1.52059e+07
Q8R361	Q8R361	Rab11 family-interacting protein 5 (Rab11-FIP5) (Rab11-interacting protein Rip11)	Rab11fip5	NA	NA	NA	NA	4.43754e+07	9.10907e+07	2.28124e+07	3.71547e+07	5.09933e+06	NA	5.54883e+06	3.60465e+06
Q8R368	Q8R368	Dynein axonemal assembly factor 4 (Dyslexia susceptibility 1 candidate gene 1 protein homolog)	Dnaaf4	NA	NA	NA	NA	4.99579e+06	6.6916e+06	2.09074e+06	4268806	NA	NA	NA	NA
Q8R370	Q8R370	Harmonin-binding protein USHBP1 (Usher syndrome type-1C protein-binding protein 1) (USH1C-binding protein 1)	Ushbp1	NA	NA	NA	NA	NA	NA	NA	NA	1.15946e+06	NA	NA	NA
Q8R3B7-1	Q8R3B7	Bromodomain-containing protein 8	Brd8	NA	NA	NA	NA	824496	1.16865e+06	432454	663766	NA	NA	NA	NA
Q8R3C6-1	Q8R3C6	Probable RNA-binding protein 19 (RNA-binding motif protein 19)	Rbm19	NA	NA	NA	NA	2.45261e+06	2.74761e+06	1.10927e+06	834297	NA	NA	NA	NA
Q8R3E3	Q8R3E3	WD repeat domain phosphoinositide-interacting protein 1 (WIPI-1) (WD40 repeat protein interacting with phosphoinositides of 49 kDa) (WIPI 49 kDa)	Wipi1	NA	NA	NA	NA	NA	NA	NA	NA	2.73671e+06	NA	NA	1.58045e+06
Q8R3L2-1	Q8R3L2	Transcription factor 25 (TCF-25) (Nuclear localized protein 1)	Tcf25	NA	NA	NA	NA	NA	NA	NA	NA	1.95326e+06	785849	4.06411e+06	1.14973e+06
Q8R3N1	Q8R3N1	Nucleolar protein 14 (Nucleolar complex protein 14)	Nop14	NA	NA	NA	NA	9.23567e+06	11537116	4.13994e+06	4.42785e+06	NA	NA	NA	NA
Q8R3N6	Q8R3N6	THO complex subunit 1 (Tho1) (Nuclear matrix protein p84)	Thoc1	NA	NA	NA	NA	2.36006e+06	1.16256e+06	1.58984e+06	1.78093e+06	NA	NA	NA	NA
Q8R3V5-1	Q8R3V5	Endophilin-B2 (SH3 domain-containing GRB2-like protein B2)	Sh3glb2	NA	NA	NA	NA	NA	NA	NA	NA	645877	NA	330799	388906
Q8R3Y5	Q8R3Y5	Uncharacterized protein C19orf47 homolog		NA	NA	NA	NA	4.43019e+06	3.26969e+06	2505513	2.93596e+06	1.94207e+06	778499	1.04277e+06	2.18766e+06
Q8R411	Q8R411	Myc target protein 1 (Myc target in myeloid cells protein 1)	Myct1	NA	NA	NA	NA	964280	257961	364969	NA	NA	NA	NA	NA
Q8R4P4	Q8R4P4	Transmembrane channel-like protein 2 (Transmembrane cochlear-expressed protein 2)	Tmc2	NA	NA	NA	NA	5.43171e+07	7.18945e+07	7.06404e+07	9.08005e+07	NA	NA	NA	NA
Q8R4R6	Q8R4R6	Nucleoporin NUP35 (35 kDa nucleoporin) (Mitotic phosphoprotein 44) (MP-44) (Nuclear pore complex protein Nup53) (Nucleoporin NUP53)	Nup35	NA	NA	NA	NA	499797	650216	334942	715977	141391	255598	343809	411608
Q8R4U0	Q8R4U0	Stabilin-2 (Fasciclin, EGF-like, laminin-type EGF-like and link domain-containing scavenger receptor 2) (FEEL-2) [Cleaved into: Short form stabilin-2]	Stab2	NA	8740672	NA	10605020	NA	NA	NA	NA	NA	NA	NA	NA
Q8R4U7	Q8R4U7	Leucine zipper protein 1 (Leucine zipper motif-containing protein)	Luzp1	NA	NA	NA	NA	1.55365e+07	1.85871e+07	9.41729e+06	1.08199e+07	1.45475e+07	3.54485e+06	1.82294e+07	1.33212e+07
Q8R502	Q8R502	Volume-regulated anion channel subunit LRRC8C (Factor for adipocyte differentiation 158) (Leucine-rich repeat-containing protein 8C)	Lrrc8c	NA	NA	NA	NA	216285424	230143168	165875616	220040784	NA	NA	NA	NA
Q8R550-1	Q8R550	SH3 domain-containing kinase-binding protein 1 (Regulator of ubiquitous kinase) (Ruk) (SH3-containing, expressed in tumorigenic astrocytes)	Sh3kbp1	NA	NA	NA	NA	1.20014e+07	17360894	7.80034e+06	9.95044e+06	2.06047e+08	1.14838e+07	7.55717e+07	6.74888e+07
Q8R570	Q8R570	Synaptosomal-associated protein 47 (SNAP-47) (Synaptosomal-associated 47 kDa protein)	Snap47	NA	NA	NA	NA	NA	NA	NA	NA	NA	NA	NA	NA
Q8R5G7	Q8R5G7	Arf-GAP with Rho-GAP domain, ANK repeat and PH domain-containing protein 3 (Centaurin-delta-3) (Cnt-d3) (Dual specificity Rho- and Arf-GTPase-activating protein 1)	Arap3	NA	NA	NA	NA	NA	NA	NA	NA	NA	NA	220979	NA
Q8R5K4	Q8R5K4	Nucleolar protein 6 (Nucleolar RNA-associated protein) (Nrap)	Nol6	NA	NA	NA	NA	1.85234e+06	1.53048e+06	NA	1.44597e+06	1.98398e+06	420058	6.53702e+06	1.63534e+06
Q8VBT0	Q8VBT0	Thioredoxin-related transmembrane protein 1 (Thioredoxin domain-containing protein 1)	Tmx1	156947	322347	266240	383897	1.30247e+06	1.56037e+06	473329	1761831	243973	324633	576006	1.10596e+06
Q8VBT9-1	Q8VBT9	Tether containing UBX domain for GLUT4 (Alveolar soft part sarcoma chromosomal region candidate gene 1 protein homolog)	Aspscr1	NA	NA	NA	NA	668500	856925	447557	433691	NA	NA	NA	NA
Q8VBU8	Q8VBU8	Protein BANP (Btg3-associated nuclear protein) (Scaffold/matrix-associated region-1-binding protein)	Banp	NA	NA	NA	NA	1386205	1.48165e+06	815283	1.04282e+06	NA	NA	NA	NA
Q8VBX6	Q8VBX6	Multiple PDZ domain protein (Multi-PDZ domain protein 1)	Mpdz	NA	NA	NA	NA	4.07172e+06	5.86239e+06	2.35741e+06	3.0347e+06	4.51911e+06	29564.7	5.1883e+06	2.02034e+06
Q8VC70	Q8VC70	RNA-binding motif, single-stranded-interacting protein 2	Rbms2	NA	NA	NA	NA	2.86012e+07	20146080	16223392	1.95897e+07	8.36312e+06	2.14192e+06	3406487	4.37166e+06
Q8VCB1	Q8VCB1	Nucleoporin NDC1 (Transmembrane protein 48)	Ndc1	NA	NA	NA	NA	NA	NA	NA	NA	NA	NA	NA	NA
Q8VCE2	Q8VCE2	GPN-loop GTPase 1 (EC 3.6.5.-) (MBD2-interacting protein) (MBDin) (XPA-binding protein 1)	Gpn1	NA	NA	NA	NA	3.33837e+07	4.27464e+07	2.62046e+07	2.38234e+07	5.17941e+07	1.01925e+07	4339207	1.70227e+07
Q8VCE4	Q8VCE4	Uncharacterized protein C9orf40 homolog		NA	NA	NA	NA	NA	NA	NA	NA	NA	NA	2.24695e+06	NA
Q8VCF0	Q8VCF0	Mitochondrial antiviral-signaling protein (MAVS) (CARD adapter inducing interferon beta) (Cardif) (Interferon beta promoter stimulator protein 1) (IPS-1) (Virus-induced-signaling adapter) (VISA)	Mavs	15761.9	92639.4	60019.5	113630	3.75003e+06	2.64226e+06	808625	1.76442e+06	NA	NA	NA	NA
Q8VCH8	Q8VCH8	UBX domain-containing protein 4 (Erasin) (UBX domain-containing protein 2)	Ubxn4	NA	NA	NA	NA	1.3987e+07	1.66101e+07	7.38795e+06	7.81816e+06	NA	NA	NA	NA
Q8VCM8	Q8VCM8	BOS complex subunit NCLN (Nicalin) (Nicastrin-like protein)	Ncln	NA	NA	NA	NA	NA	NA	NA	NA	NA	NA	947273	NA
Q8VCW8	Q8VCW8	Medium-chain acyl-CoA ligase ACSF2, mitochondrial (EC 6.2.1.2)	Acsf2	NA	NA	NA	NA	NA	NA	NA	NA	3.9395e+06	2.16532e+06	2.02558e+07	4.89825e+06
Q8VD04	Q8VD04	GRIP1-associated protein 1 (GRASP-1) (HCMV-interacting protein) [Cleaved into: GRASP-1 C-terminal chain (30kDa C-terminus form)]	Gripap1	NA	NA	NA	NA	NA	548780	198980	190068	NA	NA	NA	NA
Q8VD75	Q8VD75	Huntingtin-interacting protein 1 (HIP-1) (Huntingtin-interacting protein I) (HIP-I)	Hip1	NA	NA	NA	NA	633921	826865	136847	NA	NA	NA	NA	NA
Q8VDD5	Q8VDD5	Myosin-9 (Cellular myosin heavy chain, type A) (Myosin heavy chain 9) (Myosin heavy chain, non-muscle IIa) (Non-muscle myosin heavy chain A) (NMMHC-A) (Non-muscle myosin heavy chain IIa) (NMMHC II-a) (NMMHC-IIA)	Myh9	392568	2.16828e+06	890374	7.06634e+06	3.16245e+07	4.76957e+07	7.22026e+07	5.50768e+07	5.10831e+06	821288	1.55916e+07	7.13677e+06
Q8VDD8	Q8VDD8	WASH complex subunit 1 (WAS protein family homolog 1)	Washc1	NA	NA	NA	NA	1.52583e+06	1.15365e+06	864106	1.04167e+06	NA	NA	NA	NA
Q8VDD9	Q8VDD9	PH-interacting protein (PHIP) (IRS-1 PH domain-binding protein) (Neuronal differentiation-related protein) (NDRP) (WD repeat-containing protein 11)	Phip	NA	NA	NA	NA	1.34472e+06	1.54675e+06	498899	601660	NA	NA	NA	NA
Q8VDG3	Q8VDG3	Poly(A)-specific ribonuclease PARN (EC 3.1.13.4) (Polyadenylate-specific ribonuclease)	Parn	NA	NA	NA	NA	4.52652e+06	5.15236e+06	1.72698e+06	3.23564e+06	NA	NA	NA	NA
Q8VDJ3	Q8VDJ3	Vigilin (High density lipoprotein-binding protein) (HDL-binding protein)	Hdlbp	NA	NA	NA	NA	2.28051e+08	1.86761e+08	1.45702e+08	1.83407e+08	5.61065e+07	1.04912e+07	5.95732e+07	4.99904e+07
Q8VDL4	Q8VDL4	ADP-dependent glucokinase (ADP-GK) (ADPGK) (EC 2.7.1.147)	Adpgk	NA	NA	NA	NA	379242	7405050	2.17255e+07	27969907	NA	NA	NA	NA
Q8VDM1	Q8VDM1	Zinc finger CCCH-type with G patch domain-containing protein	Zgpat	NA	NA	NA	NA	NA	NA	NA	NA	395479	NA	NA	253557
Q8VDM4	Q8VDM4	26S proteasome non-ATPase regulatory subunit 2 (26S proteasome regulatory subunit RPN1) (26S proteasome regulatory subunit S2) (26S proteasome subunit p97)	Psmd2	NA	NA	NA	NA	6.4156e+06	7.42341e+06	4.29931e+06	5.24991e+06	2558753	NA	4.1272e+06	2.17629e+06
Q8VDM6	Q8VDM6	Heterogeneous nuclear ribonucleoprotein U-like protein 1	Hnrnpul1	NA	NA	NA	NA	1.66197e+06	1171218	1.07329e+06	1.25142e+06	NA	NA	NA	NA
Q8VDN2	Q8VDN2	Sodium/potassium-transporting ATPase subunit alpha-1 (Na(+)/K(+) ATPase alpha-1 subunit) (EC 7.2.2.13) (Sodium pump subunit alpha-1)	Atp1a1	NA	374782	252614	484763	2.98127e+07	3.22407e+07	1.82051e+07	2.28425e+07	3.38673e+07	8.22889e+06	4.10925e+07	2.26549e+07
Q8VDP4	Q8VDP4	Cell cycle and apoptosis regulator protein 2 (Cell division cycle and apoptosis regulator protein 2)	Ccar2	NA	NA	NA	NA	6.38822e+06	5.38938e+06	3.97537e+06	5.38946e+06	NA	NA	NA	NA
Q8VDP6	Q8VDP6	CDP-diacylglycerol--inositol 3-phosphatidyltransferase (EC 2.7.8.11) (Phosphatidylinositol synthase) (PI synthase) (PtdIns synthase)	Cdipt	NA	NA	NA	NA	NA	NA	NA	NA	NA	NA	2138904	NA
Q8VDQ9	Q8VDQ9	Protein KRI1 homolog	Kri1	NA	NA	NA	NA	1.90467e+06	1.16392e+07	1.41381e+06	1.70499e+06	NA	NA	NA	NA
Q8VDR9-1	Q8VDR9	Dedicator of cytokinesis protein 6	Dock6	NA	NA	NA	NA	2.83698e+06	3.24481e+06	2.69831e+06	2.63013e+06	NA	NA	NA	NA
Q8VDW0-1	Q8VDW0	ATP-dependent RNA helicase DDX39A (EC 3.6.4.13) (DEAD box protein 39)	Ddx39a	1.29121e+06	7.3685e+06	6167471	5.89842e+06	5.44373e+07	8.36584e+07	4.47051e+07	5.51501e+07	9.32884e+07	2.8629e+07	2.12747e+08	8.20881e+07
Q8VDZ4	Q8VDZ4	Palmitoyltransferase ZDHHC5 (EC 2.3.1.225) (Zinc finger DHHC domain-containing protein 5) (DHHC-5)	Zdhhc5	NA	NA	NA	NA	1.29177e+06	2.4937e+06	492714	NA	922752	NA	422848	350938
Q8VE47	Q8VE47	Ubiquitin-like modifier-activating enzyme 5 (Ubiquitin-activating enzyme 5) (UFM1-activating enzyme)	Uba5	NA	NA	NA	NA	2.42382e+06	3.81377e+06	4.04467e+06	4.80892e+06	NA	NA	NA	NA
Q8VE65	Q8VE65	Transcription initiation factor TFIID subunit 12 (Transcription initiation factor TFIID 20 kDa subunits) (TAFII-20) (TAFII20)	Taf12	NA	NA	NA	NA	1.49276e+06	1.35525e+06	1.17211e+06	1.53314e+06	NA	NA	NA	NA
Q8VE88	Q8VE88	Protein FAM114A2	Fam114a2	NA	NA	NA	NA	4.15234e+06	4479842	2833433	3.17873e+06	NA	NA	NA	NA
Q8VEB2	Q8VEB2	Protein salvador homolog 1 (45 kDa WW domain protein) (mWW45)	Sav1	NA	NA	NA	NA	NA	NA	NA	NA	3.38803e+06	473360	484272	1.49213e+06
Q8VED5	Q8VED5	Keratin, type II cytoskeletal 79 (Cytokeratin-79) (CK-79) (Keratin-79) (K79) (Type-II keratin Kb38)	Krt79	13576439	6.43536e+06	22506012	10692128	30432208	10873139	35517368	4308049	12437135	17661816	29292776	NA
Q8VEK3	Q8VEK3	Heterogeneous nuclear ribonucleoprotein U (hnRNP U) (Scaffold-attachment factor A) (SAF-A)	Hnrnpu	1.57806e+06	1.32294e+07	9.75914e+06	10617735	5.02133e+08	4.77646e+08	2.63237e+08	3.62041e+08	1.29017e+08	5.3148e+07	1.19201e+08	1.28584e+08
Q8VEM8	Q8VEM8	Phosphate carrier protein, mitochondrial (Phosphate transport protein) (PTP) (Solute carrier family 25 member 3)	Slc25a3	3.56228e+07	5.99874e+07	4.55346e+07	5.56177e+07	2.1515e+08	2.16332e+08	1.46e+08	1.79141e+08	1.37473e+08	8.46989e+07	285267647	1.64801e+08
Q8VH51-1	Q8VH51	RNA-binding protein 39 (Coactivator of activating protein 1 and estrogen receptors) (Coactivator of AP-1 and ERs) (RNA-binding motif protein 39) (RNA-binding region-containing protein 2)	Rbm39	NA	NA	NA	NA	160786	1.27793e+06	NA	112980	NA	NA	NA	NA
Q8VHG2	Q8VHG2	Angiomotin	Amot	NA	NA	NA	NA	NA	774393	399425	313815	NA	NA	NA	NA
Q8VHH5-1	Q8VHH5	Arf-GAP with GTPase, ANK repeat and PH domain-containing protein 3 (AGAP-3) (CRAM-associated GTPase) (CRAG) (Centaurin-gamma-3) (Cnt-g3) (MR1-interacting protein) (MRIP-1)	Agap3	NA	NA	NA	NA	NA	NA	NA	NA	307357	NA	259393	343091
Q8VHR5	Q8VHR5	Transcriptional repressor p66-beta (GATA zinc finger domain-containing protein 2B) (p66/p68)	Gatad2b	NA	NA	NA	NA	3.59414e+06	4.26313e+06	2.80237e+06	3.62001e+06	NA	NA	NA	NA
Q8VHX6-1	Q8VHX6	Filamin-C (FLN-C) (ABP-280-like protein) (ABP-L) (Actin-binding-like protein) (Filamin-2) (Gamma-filamin)	Flnc	NA	NA	NA	NA	1.67012e+07	2.56221e+07	1.07865e+07	9.15231e+06	2.67796e+06	496232	2.33569e+07	1.62567e+06
Q8VI33	Q8VI33	Transcription initiation factor TFIID subunit 9 (RNA polymerase II TBP-associated factor subunit G) (Transcription initiation factor TFIID 31 kDa subunit) (TAFII-31) (TAFII31) (Transcription initiation factor TFIID 32 kDa subunit) (TAFII-32) (TAFII32)	Taf9	NA	NA	NA	NA	1.60724e+08	2.43818e+08	8.78438e+07	1.14295e+08	NA	NA	NA	NA
Q8VI36	Q8VI36	Paxillin	Pxn	NA	NA	NA	NA	2.54452e+07	3.29853e+07	1.60659e+07	1.89296e+07	2.98449e+07	5.77363e+06	1.96795e+07	1.6593e+07
Q8VI93	Q8VI93	2'-5'-oligoadenylate synthase 3 ((2-5')oligo(A) synthase 3) (2-5A synthase 3) (EC 2.7.7.84) (2',5'-oligoadenylate synthetase-like 10)	Oas3	NA	NA	NA	NA	NA	NA	NA	NA	NA	NA	860747	38610.8
Q8VI94	Q8VI94	2'-5'-oligoadenylate synthase-like protein 1 (2',5'-oligoadenylate synthetase-like 9)	Oasl1	506244	4.02005e+06	3.27186e+06	2.41125e+06	3.42588e+07	2.0716e+07	2.17509e+07	2.50758e+07	1.71747e+07	1.75236e+07	133669039	3.46085e+07
Q8VIJ6	Q8VIJ6	Splicing factor, proline- and glutamine-rich (DNA-binding p52/p100 complex, 100 kDa subunit) (Polypyrimidine tract-binding protein-associated-splicing factor) (PSF) (PTB-associated-splicing factor)	Sfpq	NA	853250	NA	2.00748e+06	2.45146e+08	2.49159e+08	1.45583e+08	2.0297e+08	5.44906e+07	1.04807e+07	7.04244e+07	6.0364e+07
Q8VIK5-1	Q8VIK5	Platelet endothelial aggregation receptor 1 (mPEAR1) (Jagged and Delta protein) (Protein Jedi) (Multiple epidermal growth factor-like domains protein 12) (Multiple EGF-like domains protein 12)	Pear1	NA	NA	NA	NA	3.43229e+06	1.05017e+07	2.29452e+06	2.64907e+06	1.30334e+06	50433.3	505132	750531
Q8WTY4	Q8WTY4	Anamorsin (Cytokine-induced apoptosis inhibitor 1) (Fe-S cluster assembly protein DRE2 homolog)	Ciapin1	NA	NA	NA	NA	NA	NA	NA	NA	NA	NA	NA	NA
Q91V01	Q91V01	Lysophospholipid acyltransferase 5 (LPLAT 5) (EC 2.3.1.-) (1-acylglycerophosphocholine O-acyltransferase) (EC 2.3.1.23) (1-acylglycerophosphoethanolamine O-acyltransferase) (EC 2.3.1.n7) (1-acylglycerophosphoserine O-acyltransferase) (EC 2.3.1.n6) (Lysophosphatidylcholine acyltransferase) (LPCAT) (Lyso-PC acyltransferase) (Lysophosphatidylcholine acyltransferase 3) (Lyso-PC acyltransferase 3) (mL…	Lpcat3	NA	NA	NA	NA	NA	NA	NA	NA	1.45566e+06	3.40711e+06	1.49957e+06	865416
Q91V41	Q91V41	Ras-related protein Rab-14	Rab14	NA	NA	NA	NA	5.93722e+06	6535367	4.12684e+06	4.91907e+06	7.88995e+06	280571	1.93067e+07	6.98499e+06
Q91V61	Q91V61	Sideroflexin-3	Sfxn3	NA	NA	NA	NA	4.85292e+06	2.89314e+06	3.05179e+06	6034517	4.9334e+06	967101	3.47077e+06	4.51568e+06
Q91V92	Q91V92	ATP-citrate synthase (EC 2.3.3.8) (ATP-citrate (pro-S-)-lyase) (Citrate cleavage enzyme)	Acly	NA	NA	NA	NA	2.34437e+06	4.01146e+06	1.43315e+06	1.14045e+06	NA	NA	NA	NA
Q91VA6	Q91VA6	Polymerase delta-interacting protein 2	Poldip2	NA	NA	NA	NA	NA	NA	NA	NA	NA	NA	977208	702956
Q91VC3	Q91VC3	Eukaryotic initiation factor 4A-III (eIF-4A-III) (eIF4A-III) (EC 3.6.4.13) (ATP-dependent RNA helicase DDX48) (ATP-dependent RNA helicase eIF4A-3) (DEAD box protein 48) (Eukaryotic translation initiation factor 4A isoform 3) [Cleaved into: Eukaryotic initiation factor 4A-III, N-terminally processed]	Eif4a3	300722	740636	408866	443037	2.11797e+07	3.03672e+07	1.41306e+07	1.69878e+07	2.20327e+07	1.10461e+07	3.72293e+07	1.56346e+07
Q91VE0	Q91VE0	Long-chain fatty acid transport protein 4 (FATP-4) (Fatty acid transport protein 4) (Arachidonate--CoA ligase) (EC 6.2.1.15) (Long-chain-fatty-acid--CoA ligase) (EC 6.2.1.3) (Solute carrier family 27 member 4) (Very long-chain acyl-CoA synthetase 4) (ACSVL4) (EC 6.2.1.-)	Slc27a4	NA	NA	NA	NA	NA	NA	NA	NA	675445	451219	1.13827e+06	805602
Q91VE6	Q91VE6	MKI67 FHA domain-interacting nucleolar phosphoprotein (Nucleolar protein interacting with the FHA domain of pKI-67) (mNIFK)	Nifk	NA	NA	NA	NA	66343246	6.10821e+07	2.87768e+07	4.77655e+07	5401273	NA	1.32786e+06	3.80438e+06
Q91VH2	Q91VH2	Sorting nexin-9	Snx9	NA	NA	NA	NA	1.95887e+07	3.12751e+07	1.37425e+07	1.62004e+07	2.31691e+08	9.20405e+07	3.65671e+08	2.09229e+08
Q91VI7	Q91VI7	Ribonuclease inhibitor (Ribonuclease/angiogenin inhibitor 1)	Rnh1	NA	NA	NA	NA	2.34066e+06	NA	NA	446043	NA	NA	NA	NA
Q91VJ2	Q91VJ2	Caveolae-associated protein 3 (Cavin-3) (Protein kinase C delta-binding protein) (Serum deprivation response factor-related gene product that binds to C-kinase)	Cavin3	NA	NA	NA	NA	9291073	1.27603e+07	5.64594e+06	7269816	NA	NA	NA	NA
Q91VJ5	Q91VJ5	Polyglutamine-binding protein 1 (PQBP-1) (38 kDa nuclear protein containing a WW domain) (Npw38) (Polyglutamine tract-binding protein 1)	Pqbp1	NA	NA	NA	NA	2.93209e+06	1.97159e+06	1.75069e+06	1.61165e+06	NA	NA	NA	NA
Q91VK4	Q91VK4	Integral membrane protein 2C (Transmembrane protein BRI3) [Cleaved into: CT-BRI3]	Itm2c	NA	NA	NA	NA	455005	1.05265e+06	188666	836574	NA	NA	NA	NA
Q91VL9	Q91VL9	Zinc finger and BTB domain-containing protein 1	Zbtb1	NA	NA	NA	NA	NA	NA	NA	NA	4.8874e+06	2.60601e+06	3.57186e+06	3.8122e+06
Q91VM4-1	Q91VM4	Sphingosine-1-phosphate transporter SPNS2 (Protein spinster homolog 2) (Spinster homolog 2) (Spns2)	Spns2	NA	NA	NA	NA	NA	NA	NA	NA	274186	239497	5756388	397289
Q91VM9	Q91VM9	Inorganic pyrophosphatase 2, mitochondrial (EC 3.6.1.1) (Pyrophosphate phospho-hydrolase 2) (PPase 2)	Ppa2	NA	NA	NA	NA	NA	NA	NA	NA	NA	NA	NA	NA
Q91VR2	Q91VR2	ATP synthase subunit gamma, mitochondrial (ATP synthase F1 subunit gamma) (F-ATPase gamma subunit)	Atp5f1c	NA	NA	NA	NA	3.99627e+06	6.12236e+06	3.36446e+06	3.86144e+06	8.51024e+06	1.2606e+07	7.21149e+07	1.98912e+07
Q91VR5	Q91VR5	ATP-dependent RNA helicase DDX1 (EC 3.6.4.13) (DEAD box protein 1)	Ddx1	NA	NA	NA	NA	NA	NA	NA	NA	NA	NA	NA	NA
Q91VW9	Q91VW9	Zinc finger protein with KRAB and SCAN domains 3 (SCAN-KRAB-zinc finger protein) (Zinc finger protein 306) (Zinc finger protein 307) (Zinc finger protein 47 homolog) (Zf47) (Zfp-47)	Zkscan3	NA	NA	NA	NA	NA	NA	NA	NA	487647	NA	NA	NA
Q91VX2	Q91VX2	Ubiquitin-associated protein 2 (UBAP-2) (Protein lingerer homolog 1) (mLig-1) (RNA polymerase II degradation factor Ubap2)	Ubap2	NA	NA	NA	NA	3.54774e+07	3.80811e+07	1.80842e+07	2.37897e+07	1.66994e+06	4.71235e+06	1.09801e+06	1.85483e+06
Q91VY9	Q91VY9	Cytoplasmic 60S subunit biogenesis factor ZNF622 (Zinc finger protein 622)	Znf622	NA	NA	NA	NA	402362	544166	482155	575344	NA	NA	NA	NA
Q91W18-1	Q91W18	Tudor domain-containing protein 3	Tdrd3	NA	NA	NA	NA	516967	337405	203752	NA	NA	NA	NA	NA
Q91W39	Q91W39	Nuclear receptor coactivator 5 (NCoA-5) (Coactivator independent of AF-2) (CIA)	Ncoa5	NA	NA	NA	NA	2.37354e+06	4089100	1.84248e+06	3.08754e+06	2.19742e+06	703038	5.01633e+06	3877472
Q91W50	Q91W50	Cold shock domain-containing protein E1	Csde1	NA	NA	NA	NA	1.60612e+07	2.10885e+07	1.17189e+07	1.60026e+07	4.20556e+06	947748	3.24209e+06	1.22348e+06
Q91W86	Q91W86	Vacuolar protein sorting-associated protein 11 homolog	Vps11	NA	NA	NA	NA	NA	NA	NA	NA	604480	593342	387218	699752
Q91W92	Q91W92	Cdc42 effector protein 1 (Binder of Rho GTPases 5)	Cdc42ep1	NA	NA	NA	NA	6.94755e+06	2.04813e+07	5.13785e+06	1.61142e+07	NA	NA	NA	NA
Q91WF3	Q91WF3	Adenylate cyclase type 4 (EC 4.6.1.1) (ATP pyrophosphate-lyase 4) (Adenylate cyclase type IV) (Adenylyl cyclase 4)	Adcy4	NA	NA	NA	NA	550636	157218	204473	110876	NA	NA	NA	NA
Q91WG2-1	Q91WG2	Rab GTPase-binding effector protein 2 (Rabaptin-5beta)	Rabep2	NA	NA	NA	NA	NA	NA	NA	NA	NA	NA	NA	NA
Q91WJ8	Q91WJ8	Far upstream element-binding protein 1 (FBP) (FUSE-binding protein 1)	Fubp1	NA	NA	NA	NA	351857	1.35947e+06	944023	1.53921e+06	NA	NA	968470	NA
Q91WK2	Q91WK2	Eukaryotic translation initiation factor 3 subunit H (eIF3h) (Eukaryotic translation initiation factor 3 subunit 3) (eIF-3-gamma) (eIF3 p40 subunit)	Eif3h	NA	NA	NA	NA	NA	NA	NA	NA	1.53485e+06	NA	1610589	810511
Q91WL8	Q91WL8	WW domain-containing oxidoreductase (EC 1.1.1.-)	Wwox	NA	NA	NA	NA	1.21964e+06	1.07366e+06	2.10148e+06	899224	NA	NA	NA	NA
Q91WM1	Q91WM1	Spermatid perinuclear RNA-binding protein	Strbp	NA	NA	NA	NA	2.16233e+06	1.9764e+06	1.23647e+06	2.02562e+06	NA	NA	NA	NA
Q91WM3	Q91WM3	U3 small nucleolar RNA-interacting protein 2 (RRP9 homolog) (U3 small nucleolar ribonucleoprotein-associated 55 kDa protein) (U3 snoRNP-associated 55 kDa protein) (U3-55K)	Rrp9	NA	NA	NA	NA	124922	126513	128841	121740	NA	NA	NA	NA
Q91WQ5	Q91WQ5	TAF5-like RNA polymerase II p300/CBP-associated factor-associated factor 65 kDa subunit 5L (TAF5L) (PCAF-associated factor 65 beta) (PAF65-beta)	Taf5l	NA	NA	NA	NA	541241	789179	556055	494130	NA	NA	NA	NA
Q91WR3-1	Q91WR3	Activating signal cointegrator 1 complex subunit 2 (ASC-1 complex subunit p100) (Trip4 complex subunit p100)	Ascc2	NA	NA	NA	NA	NA	NA	NA	NA	468850	NA	167386	394905
Q91WS0	Q91WS0	CDGSH iron-sulfur domain-containing protein 1 (Cysteine transaminase CISD1) (EC 2.6.1.3) (MitoNEET)	Cisd1	NA	NA	NA	NA	2813649	4.23814e+06	1.94753e+06	2.10956e+06	NA	NA	NA	NA
Q91X43-1	Q91X43	SH3 domain-containing protein 19 (Kryn)	Sh3d19	NA	NA	NA	NA	344225	604235	NA	NA	5.14359e+07	2.30596e+06	5.99258e+06	2.60071e+07
Q91X84	Q91X84	CREB-regulated transcription coactivator 3 (Transducer of regulated cAMP response element-binding protein 3) (TORC-3) (Transducer of CREB protein 3)	Crtc3	NA	NA	NA	NA	NA	NA	NA	NA	571283	NA	NA	345794
Q91XE8	Q91XE8	Transmembrane protein 205	Tmem205	NA	NA	NA	NA	NA	NA	NA	NA	NA	203266	1108125	NA
Q91XI1	Q91XI1	tRNA-dihydrouridine(47) synthase [NAD(P)(+)]-like (EC 1.3.1.89) (mRNA-dihydrouridine synthase DUS3L) (EC 1.3.1.-) (tRNA-dihydrouridine synthase 3-like)	Dus3l	NA	NA	NA	NA	NA	575224	464963	NA	NA	NA	NA	NA
Q91YD3	Q91YD3	mRNA-decapping enzyme 1A (EC 3.6.1.62) (MAD homolog 4-interacting transcription coactivator 1) (Smad4-interacting transcriptional co-activator) (Transcription factor SMIF)	Dcp1a	NA	NA	NA	NA	1635073	1.72558e+06	590445	682478	NA	NA	NA	NA
Q91YE5	Q91YE5	Bromodomain adjacent to zinc finger domain protein 2A (Transcription termination factor I-interacting protein 5) (TTF-I-interacting protein 5) (Tip5)	Baz2a	NA	NA	NA	NA	NA	NA	NA	NA	259247	NA	11426497	910037
Q91YE7	Q91YE7	RNA-binding protein 5 (Putative tumor suppressor LUCA15) (RNA-binding motif protein 5)	Rbm5	NA	NA	NA	NA	3.49195e+06	2.49948e+06	1.05567e+06	886260	NA	NA	943477	401111
Q91YH5-1	Q91YH5	Atlastin-3 (EC 3.6.5.-)	Atl3	NA	NA	NA	NA	147358	NA	NA	1.37181e+06	904171	5.613e+06	1.12054e+07	2.99891e+06
Q91YI1	Q91YI1	Autophagy-related protein 13	Atg13	NA	NA	NA	NA	NA	NA	NA	NA	NA	NA	NA	NA
Q91YK2	Q91YK2	Ribosomal RNA processing protein 1 homolog B (RRP1-like protein B)	Rrp1b	NA	NA	NA	NA	3.72826e+06	5.07873e+06	1.96255e+06	2.52807e+06	NA	NA	NA	NA
Q91YM4	Q91YM4	FAST kinase domain-containing protein 4 (Protein TBRG4) (Transforming growth factor beta regulator 4)	Tbrg4	NA	NA	NA	NA	NA	NA	NA	NA	NA	NA	NA	NA
Q91YQ5	Q91YQ5	Dolichyl-diphosphooligosaccharide--protein glycosyltransferase subunit 1 (Dolichyl-diphosphooligosaccharide--protein glycosyltransferase 67 kDa subunit) (Ribophorin I) (RPN-I) (Ribophorin-1)	Rpn1	NA	296324	NA	529416	8.95116e+06	1.244e+07	5.27508e+06	6.6644e+06	3.6717e+06	914568	5.39639e+06	3.63522e+06
Q91YR1	Q91YR1	Twinfilin-1 (Protein A6)	Twf1	NA	NA	NA	NA	918097	1.80201e+06	254021	914544	NA	NA	NA	NA
Q91YR5	Q91YR5	eEF1A lysine and N-terminal methyltransferase (eEF1A-KNMT) (Methyltransferase-like protein 13) [Includes: eEF1A lysine methyltransferase (EC 2.1.1.-); eEF1A N-terminal methyltransferase (EC 2.1.1.-)]	Mettl13	NA	NA	NA	NA	NA	NA	NA	NA	1.82337e+06	NA	NA	2.12179e+06
Q91YR7	Q91YR7	Pre-mRNA-processing factor 6 (PRP6 homolog) (U5 snRNP-associated 102 kDa protein) (U5-102 kDa protein)	Prpf6	NA	NA	NA	NA	4.11952e+06	4.18785e+06	2.42805e+06	2.90207e+06	3.55575e+06	1.24949e+06	8.27086e+06	3.20233e+06
Q91YT0	Q91YT0	NADH dehydrogenase [ubiquinone] flavoprotein 1, mitochondrial (EC 7.1.1.2) (Complex I-51kD) (CI-51kD) (NADH-ubiquinone oxidoreductase 51 kDa subunit)	Ndufv1	NA	NA	NA	NA	NA	NA	NA	NA	570260	401096	NA	574491
Q91YT7	Q91YT7	YTH domain-containing family protein 2	Ythdf2	NA	NA	NA	NA	4.62904e+06	4.22228e+06	3.23384e+06	4.37535e+06	1.92704e+06	279067	1.36162e+06	1744644
Q91YU6	Q91YU6	Leucine zipper putative tumor suppressor 2 (Protein LAPSER1)	Lzts2	NA	NA	NA	NA	NA	NA	NA	NA	1.72228e+07	547619	6.32284e+06	10848842
Q91YU8	Q91YU8	Suppressor of SWI4 1 homolog (Ssf-1) (Peter Pan homolog)	Ppan	NA	NA	NA	NA	5.14862e+06	3.72536e+06	701998	2.6103e+06	NA	NA	NA	NA
Q91Z49	Q91Z49	UAP56-interacting factor (Forty-two-three domain-containing protein 1) (Protein 40-2-3)	Fyttd1	NA	NA	NA	NA	354019	597836	324161	363377	NA	NA	NA	NA
Q91ZA3	Q91ZA3	Propionyl-CoA carboxylase alpha chain, mitochondrial (PCCase subunit alpha) (EC 6.4.1.3) (Propanoyl-CoA:carbon dioxide ligase subunit alpha)	Pcca	3.00568e+10	3.71815e+10	2.88963e+10	3.48436e+10	3.71219e+10	5.21946e+10	2.73903e+10	3.15506e+10	2.8339e+10	2.92817e+10	4.12186e+10	2.94569e+10
Q91ZE0	Q91ZE0	Trimethyllysine dioxygenase, mitochondrial (EC 1.14.11.8) (Epsilon-trimethyllysine 2-oxoglutarate dioxygenase) (TML hydroxylase) (TML-alpha-ketoglutarate dioxygenase) (TML dioxygenase) (TMLD)	Tmlhe	NA	NA	NA	NA	2.73947e+06	5020653	NA	2993154	3.46711e+06	NA	9.62174e+06	3.98684e+06
Q91ZU6	Q91ZU6	Dystonin (Bullous pemphigoid antigen 1) (BPA) (Dystonia musculorum protein) (Hemidesmosomal plaque protein) (Microtubule actin cross-linking factor 2)	Dst	NA	NA	NA	NA	2.56277e+06	7.02092e+06	1.53691e+06	3.64572e+06	NA	NA	NA	NA
Q91ZW3	Q91ZW3	SWI/SNF-related matrix-associated actin-dependent regulator of chromatin subfamily A member 5 (EC 3.6.4.-) (Sucrose nonfermenting protein 2 homolog) (mSnf2h)	Smarca5	217345	284731	208044	422979	3.05584e+07	2.83741e+07	1.68313e+07	2.75302e+07	4.6605e+06	159506	1.14045e+07	3.83882e+06
Q91ZY2	Q91ZY2	Histamine H4 receptor (H4R) (HH4R)	Hrh4	NA	NA	NA	NA	6.66969e+06	3.65595e+06	1.95269e+06	2.76933e+06	NA	NA	NA	NA
Q920B9	Q920B9	FACT complex subunit SPT16 (Chromatin-specific transcription elongation factor 140 kDa subunit) (FACT 140 kDa subunit) (FACTp140) (Facilitates chromatin transcription complex subunit SPT16)	Supt16h	NA	NA	NA	NA	1.04062e+06	1.96236e+06	511049	1.05699e+06	NA	NA	NA	NA
Q921C5-1	Q921C5	Protein bicaudal D homolog 2 (Bic-D 2)	Bicd2	NA	NA	NA	NA	5.73674e+07	8.78271e+07	2.01227e+07	4.08355e+07	3.71764e+07	4.35357e+06	2.04392e+07	1.39619e+07
Q921F2	Q921F2	TAR DNA-binding protein 43 (TDP-43)	Tardbp	1.91483e+06	2.03753e+06	2.14387e+06	2.27664e+06	6.45152e+07	9.72933e+07	5.18192e+07	5.18042e+07	1.26656e+07	2.50471e+06	25159915	1.29921e+07
Q921H8	Q921H8	3-ketoacyl-CoA thiolase A, peroxisomal (EC 2.3.1.16) (Acetyl-CoA C-myristoyltransferase) (EC 2.3.1.155) (Acetyl-CoA acyltransferase A) (EC 2.3.1.9) (Beta-ketothiolase A) (Peroxisomal 3-oxoacyl-CoA thiolase A)	Acaa1a	NA	NA	NA	NA	NA	NA	NA	NA	NA	NA	NA	NA
Q921L3	Q921L3	Calcium load-activated calcium channel (CLAC channel) (GEL complex subunit TMCO1) (Transmembrane and coiled-coil domain-containing protein 1)	Tmco1	NA	NA	NA	NA	NA	NA	NA	NA	NA	NA	NA	NA
Q921M3-1	Q921M3	Splicing factor 3B subunit 3 (Pre-mRNA-splicing factor SF3b 130 kDa subunit) (SF3b130) (Spliceosome-associated protein 130) (SAP 130)	Sf3b3	NA	NA	NA	NA	1.1959e+06	926265	1.02832e+06	698586	884214	NA	7.10589e+06	976572
Q921M4-1	Q921M4	Golgin subfamily A member 2 (130 kDa cis-Golgi matrix protein) (GM130)	Golga2	NA	NA	NA	NA	483850	453735	221924	354125	NA	NA	NA	NA
Q921N6-1	Q921N6	Probable ATP-dependent RNA helicase DDX27 (EC 3.6.4.13) (DEAD box protein 27)	Ddx27	NA	NA	NA	NA	678348	942726	NA	241899	NA	NA	NA	NA
Q921T2-1	Q921T2	Torsin-1A-interacting protein 1 (Lamina-associated polypeptide 1B) (LAP1B)	Tor1aip1	NA	535628	717786	233040	NA	NA	NA	NA	8.47781e+06	134280	1.89864e+07	9.66477e+06
Q921T2-2	Q921T2	Torsin-1A-interacting protein 1 (Lamina-associated polypeptide 1B) (LAP1B)	Tor1aip1	NA	NA	NA	NA	1.57477e+07	2.1899e+07	1.50142e+07	1.64072e+07	NA	NA	NA	NA
Q922B2	Q922B2	Aspartate--tRNA ligase, cytoplasmic (EC 6.1.1.12) (Aspartyl-tRNA synthetase) (AspRS)	Dars1	NA	NA	NA	NA	1.42286e+06	2.38983e+06	1.31822e+06	1.14839e+06	669843	1.24737e+06	354094	611536
Q922B9-1	Q922B9	Protein ITPRID2 (ITPR-interacting domain-containing protein 2) (Ki-ras-induced actin-interacting protein) (Sperm-specific antigen 2 homolog)	Itprid2	NA	NA	NA	NA	7.11773e+07	144326370	2.86882e+07	4.22301e+07	329059	202342	NA	285951
Q922C1	Q922C1	Uncharacterized protein C19orf44 homolog		NA	NA	NA	NA	NA	NA	NA	NA	94273.4	183241	420246	269343
Q922D8	Q922D8	C-1-tetrahydrofolate synthase, cytoplasmic (C1-THF synthase) [Cleaved into: C-1-tetrahydrofolate synthase, cytoplasmic, N-terminally processed] [Includes: Methylenetetrahydrofolate dehydrogenase (EC 1.5.1.5); Methenyltetrahydrofolate cyclohydrolase (EC 3.5.4.9); Formyltetrahydrofolate synthetase (EC 6.3.4.3)]	Mthfd1	NA	NA	NA	NA	844786	531753	163826	147500	NA	NA	NA	NA
Q922F4	Q922F4	Tubulin beta-6 chain	Tubb6	NA	NA	NA	NA	764395	1.83818e+06	663407	648246	4.66641e+06	878172	5.23048e+06	1.31364e+06
Q922H1-1	Q922H1	Protein arginine N-methyltransferase 3	Prmt3	NA	NA	NA	NA	NA	NA	NA	NA	851142	235146	1.70202e+06	485168
Q922J9-1	Q922J9	Fatty acyl-CoA reductase 1 (EC 1.2.1.84)	Far1	NA	NA	NA	NA	NA	NA	NA	NA	1.71235e+06	NA	1.84871e+06	975935
Q922K7	Q922K7	Probable 28S rRNA (cytosine-C(5))-methyltransferase (EC 2.1.1.-) (Nucleolar protein 1) (Nucleolar protein 2 homolog) (Proliferating-cell nucleolar antigen p120) (Proliferation-associated nucleolar protein p120)	Nop2	2.35315e+06	1.4634e+07	1.36235e+06	2.36838e+06	6.26708e+07	7.59317e+07	3.22322e+07	4.27561e+07	2.34818e+07	4.35208e+06	2.37015e+07	1.57948e+07
Q922P9	Q922P9	Cytokine-like nuclear factor N-PAC (NPAC) (Glyoxylate reductase 1 homolog) (Nuclear protein NP60) (Putative oxidoreductase GLYR1)	Glyr1	NA	NA	NA	NA	1.12308e+07	1.3399e+07	8.56221e+06	1.08928e+07	NA	NA	NA	NA
Q922Q1	Q922Q1	Mitochondrial amidoxime reducing component 2 (mARC2) (EC 1.7.-.-) (Molybdenum cofactor sulfurase C-terminal domain-containing protein 2) (MOSC domain-containing protein 2) (Moco sulfurase C-terminal domain-containing protein 2)	Mtarc2	NA	NA	NA	NA	375661	200611	73147	164791	NA	NA	NA	NA
Q922Q4	Q922Q4	Pyrroline-5-carboxylate reductase 2 (P5C reductase 2) (P5CR 2) (EC 1.5.1.2)	Pycr2	NA	NA	NA	NA	3.72694e+06	9334758	3.61765e+06	5014578	1.08499e+06	NA	1172574	735176
Q922Q8	Q922Q8	Leucine-rich repeat-containing protein 59 [Cleaved into: Leucine-rich repeat-containing protein 59, N-terminally processed]	Lrrc59	NA	NA	NA	NA	1.11921e+08	1.42922e+08	7.92396e+07	1.06943e+08	NA	NA	NA	NA
Q922R5-1	Q922R5	Serine/threonine-protein phosphatase 4 regulatory subunit 3B (SMEK homolog 2)	Ppp4r3b	NA	NA	NA	NA	231980	224875	163268	227393	NA	NA	NA	NA
Q922R8	Q922R8	Protein disulfide-isomerase A6 (EC 5.3.4.1) (Thioredoxin domain-containing protein 7)	Pdia6	NA	1929588	1.33757e+06	330417	3.50863e+07	3.62377e+07	1.92804e+07	3.33559e+07	2.99169e+07	1152113	2.77343e+07	3.23937e+07
Q922U1	Q922U1	U4/U6 small nuclear ribonucleoprotein Prp3 (Pre-mRNA-splicing factor 3)	Prpf3	NA	NA	NA	NA	2.08472e+07	1.98222e+07	1.25356e+07	1.77894e+07	1.31921e+07	6.00444e+06	7.72445e+06	1.3216e+07
Q922U2	Q922U2	Keratin, type II cytoskeletal 5 (Cytokeratin-5) (CK-5) (Keratin-5) (K5) (Type-II keratin Kb5)	Krt5	1.01055e+08	7.32008e+07	1.35374e+08	4.91503e+07	2.06415e+08	9.61062e+07	2.75845e+08	3.8966e+07	9.1891e+07	1.63556e+08	5.12823e+08	4.08923e+07
Q922V4	Q922V4	Pleiotropic regulator 1	Plrg1	NA	NA	NA	NA	8.06685e+06	10586832	5.10045e+06	8.20854e+06	194103	122621	NA	247562
Q923A2	Q923A2	Protein Spindly (Coiled-coil domain-containing protein 99) (Spindle apparatus coiled-coil domain-containing protein 1)	Spdl1	NA	NA	NA	NA	NA	NA	NA	NA	NA	NA	NA	NA
Q923D4	Q923D4	Splicing factor 3B subunit 5 (SF3b5) (Pre-mRNA-splicing factor SF3b 10 kDa subunit)	Sf3b5	NA	NA	NA	NA	1.04539e+06	1.38815e+06	503254	1.57483e+06	NA	NA	NA	NA
Q923D5	Q923D5	WW domain-binding protein 11 (WBP-11) (Splicing factor that interacts with PQBP-1 and PP1)	Wbp11	NA	NA	NA	NA	4.47973e+06	6.97576e+06	1.0356e+06	2.45555e+06	NA	NA	NA	NA
Q924A2	Q924A2	Protein capicua homolog	Cic	NA	NA	NA	NA	1.42167e+06	2.25221e+06	819072	950880	NA	NA	NA	NA
Q924H2	Q924H2	Mediator of RNA polymerase II transcription subunit 15 (Mediator complex subunit 15) (Positive cofactor 2 glutamine/Q-rich-associated protein) (PC2 glutamine/Q-rich-associated protein) (mPcqap)	Med15	NA	NA	NA	NA	1.35161e+06	1.54131e+06	891771	1.10567e+06	NA	NA	NA	NA
Q924H7	Q924H7	WW domain-containing adapter protein with coiled-coil	Wac	NA	NA	NA	NA	NA	NA	NA	NA	NA	NA	NA	NA
Q924K8	Q924K8	Metastasis-associated protein MTA3	Mta3	NA	NA	NA	NA	1.22691e+06	982248	1.07619e+06	1.05936e+06	NA	NA	NA	NA
Q924T2	Q924T2	28S ribosomal protein S2, mitochondrial (MRP-S2) (S2mt)	Mrps2	NA	NA	NA	NA	NA	NA	6.98898e+06	8.02475e+06	NA	NA	NA	NA
Q925F2	Q925F2	Endothelial cell-selective adhesion molecule	Esam	97887.8	373518	437111	402837	2.74422e+07	36571823	2.64893e+07	1.7085e+07	1.97832e+06	619744	1.61174e+06	2.14326e+06
Q925I1-1	Q925I1	ATPase family AAA domain-containing protein 3 (AAA-ATPase TOB3)	Atad3	NA	NA	NA	NA	NA	NA	NA	NA	NA	NA	NA	NA
Q925J9-1	Q925J9	Mediator of RNA polymerase II transcription subunit 1 (Mediator complex subunit 1) (Peroxisome proliferator-activated receptor-binding protein) (PBP) (PPAR-binding protein) (Thyroid hormone receptor-associated protein complex 220 kDa component) (Trap220) (Thyroid receptor-interacting protein 2) (TR-interacting protein 2) (TRIP-2)	Med1	NA	NA	NA	NA	1.04385e+07	1.23976e+07	4.25493e+06	1.96204e+07	NA	NA	NA	NA
Q93092	Q93092	Transaldolase (EC 2.2.1.2)	Taldo1	NA	NA	NA	NA	2.35015e+06	4.4562e+06	2.00456e+06	1.84583e+06	NA	NA	NA	NA
Q99020	Q99020	Heterogeneous nuclear ribonucleoprotein A/B (hnRNP A/B) (CArG-binding factor-A) (CBF-A)	Hnrnpab	NA	598330	168042	720421	1.98426e+07	2.20093e+07	1.03423e+07	8.99212e+06	1.02276e+07	1.60634e+08	3.23935e+07	1.86525e+07
Q99J36	Q99J36	THUMP domain-containing protein 1	Thumpd1	NA	NA	NA	NA	579669	676847	211404	406184	NA	NA	NA	NA
Q99J62	Q99J62	Replication factor C subunit 4 (Activator 1 subunit 4)	Rfc4	NA	NA	NA	NA	2.36851e+06	NA	NA	1.82545e+06	NA	NA	NA	NA
Q99J95-1	Q99J95	Cyclin-dependent kinase 9 (EC 2.7.11.22) (EC 2.7.11.23) (Cell division protein kinase 9)	Cdk9	NA	NA	NA	NA	1.17462e+06	1803122	1.0458e+06	995884	NA	NA	NA	NA
Q99JB2	Q99JB2	Stomatin-like protein 2, mitochondrial (SLP-2) (mslp2)	Stoml2	NA	NA	NA	NA	NA	NA	NA	NA	NA	NA	NA	NA
Q99JG7	Q99JG7	TNFAIP3-interacting protein 2 (A20-binding inhibitor of NF-kappa-B activation 2) (ABIN-2)	Tnip2	NA	NA	NA	NA	NA	NA	NA	NA	NA	NA	NA	NA
Q99JI6	Q99JI6	Ras-related protein Rap-1b (EC 3.6.5.2) (GTP-binding protein smg p21B)	Rap1b	8.35477e+06	20582300	22103189	19132707	4.27102e+07	4.09255e+07	3.94605e+07	4.3176e+07	2.65688e+07	3.42957e+07	1.09682e+08	4.29147e+07
Q99JP0	Q99JP0	Mitogen-activated protein kinase kinase kinase kinase 3 (EC 2.7.11.1) (Germinal center kinase-related protein kinase) (GLK) (MAPK/ERK kinase kinase kinase 3) (MEK kinase kinase 3) (MEKKK 3)	Map4k3	NA	NA	NA	NA	NA	NA	NA	NA	NA	357677	569016	536530
Q99JP6-2	Q99JP6	Homer protein homolog 3 (Homer-3)	Homer3	NA	NA	NA	NA	NA	NA	NA	NA	1.67528e+08	7.95167e+07	1.67421e+08	1.0574e+08
Q99JR1	Q99JR1	Sideroflexin-1	Sfxn1	NA	NA	NA	NA	NA	943373	399754	637601	NA	NA	NA	NA
Q99JX7	Q99JX7	Nuclear RNA export factor 1 (Tip-associated protein) (Tip-associating protein) (mRNA export factor TAP)	Nxf1	NA	NA	NA	NA	4.34862e+06	3.62366e+06	2.43378e+06	2.47565e+06	1262666	254405	2773070	748037
Q99JY0	Q99JY0	Trifunctional enzyme subunit beta, mitochondrial (TP-beta) [Includes: 3-ketoacyl-CoA thiolase (EC 2.3.1.155) (EC 2.3.1.16) (Acetyl-CoA acyltransferase) (Beta-ketothiolase)]	Hadhb	NA	NA	NA	NA	NA	3521788	1.81428e+06	2131673	3.57251e+06	563794	16137510	3251055
Q99JY8	Q99JY8	Phospholipid phosphatase 3 (EC 3.1.3.-) (EC 3.1.3.4) (Lipid phosphate phosphohydrolase 3) (PAP2-beta) (Phosphatidate phosphohydrolase type 2b) (Phosphatidic acid phosphatase 2b) (PAP-2b) (PAP2b)	Plpp3	NA	NA	NA	NA	NA	2.21968e+06	370188	1.27377e+06	NA	NA	NA	NA
Q99K28	Q99K28	ADP-ribosylation factor GTPase-activating protein 2 (ARF GAP 2) (GTPase-activating protein ZNF289) (Zinc finger protein 289)	Arfgap2	NA	NA	NA	NA	1.71381e+06	2.31919e+06	1135621	1.57889e+06	2.65425e+06	510508	865252	1.72344e+06
Q99K48	Q99K48	Non-POU domain-containing octamer-binding protein (NonO protein)	Nono	NA	NA	NA	NA	1.71407e+09	2.22681e+09	1.15566e+09	1.33503e+09	1.73698e+09	8.3339e+08	1.18801e+09	1.09031e+09
Q99KF1	Q99KF1	Transmembrane emp24 domain-containing protein 9 (Glycoprotein 25L2) (p24 family protein alpha-2) (p24alpha2)	Tmed9	NA	NA	NA	NA	663937	1.70914e+06	536690	1.02387e+06	NA	NA	NA	NA
Q99KG3	Q99KG3	RNA-binding protein 10 (RNA-binding motif protein 10)	Rbm10	NA	NA	NA	NA	4.30767e+07	5.14306e+07	2.31619e+07	2.62202e+07	NA	NA	NA	NA
Q99KG3-2	Q99KG3	RNA-binding protein 10 (RNA-binding motif protein 10)	Rbm10	NA	NA	NA	NA	NA	NA	NA	NA	6.75934e+07	1.54495e+07	6.48335e+07	6.10484e+07
Q99KH8	Q99KH8	Serine/threonine-protein kinase 24 (EC 2.7.11.1) (Mammalian STE20-like protein kinase 3) (MST-3) (STE20-like kinase MST3) [Cleaved into: Serine/threonine-protein kinase 24 35 kDa subunit (Mammalian STE20-like protein kinase 3 N-terminal) (MST3/N); Serine/threonine-protein kinase 24 12 kDa subunit (Mammalian STE20-like protein kinase 3 C-terminal) (MST3/C)]	Stk24	NA	NA	NA	NA	NA	NA	NA	NA	1.02185e+06	NA	1.39815e+06	347860
Q99KI0	Q99KI0	Aconitate hydratase, mitochondrial (Aconitase) (EC 4.2.1.3) (Citrate hydro-lyase)	Aco2	1.33919e+06	697071	163156	1.63826e+06	5.95688e+06	6.2442e+06	3.58442e+06	3.83006e+06	5.92671e+06	622805	1.4467e+07	7.72064e+06
Q99KK9	Q99KK9	Histidine--tRNA ligase, mitochondrial (EC 6.1.1.21) (Histidine--tRNA ligase-like) (Histidyl-tRNA synthetase) (HisRS)	Hars2	228769	165965	NA	150568	NA	NA	NA	NA	NA	NA	NA	NA
Q99KN9-1	Q99KN9	Clathrin interactor 1 (Enthoprotin) (Epsin-4) (Epsin-related protein) (EpsinR)	Clint1	NA	NA	NA	NA	1.71099e+07	3.11855e+07	7.23558e+06	1.50754e+07	7.37032e+06	NA	5825192	3.3925e+06
Q99KW3-1	Q99KW3	TRIO and F-actin-binding protein (Protein Tara) (Trio-associated repeat on actin)	Triobp	NA	NA	NA	NA	4.81537e+06	8.63841e+06	3.23447e+06	3.15893e+06	5.56071e+06	1.61149e+06	2.86286e+06	4.78278e+06
Q99KY4-1	Q99KY4	Cyclin-G-associated kinase (EC 2.7.11.1)	Gak	NA	NA	NA	NA	1.1268e+06	464689	312730	367433	3.07416e+06	NA	NA	1.57796e+06
Q99L00-1	Q99L00	HAUS augmin-like complex subunit 8 (HEC1/NDC80-interacting centrosome-associated protein 1) (Sarcoma antigen NY-SAR-48 homolog)	Haus8	NA	NA	NA	NA	267884	461493	217315	225491	2.89597e+06	204744	NA	739676
Q99L04	Q99L04	Dehydrogenase/reductase SDR family member 1 (EC 1.1.1.-) (Short chain dehydrogenase/reductase family 19C member 1) (Protein SDR19C1)	Dhrs1	NA	469164	NA	492849	1.7746e+06	1.86254e+06	1.60486e+06	1.56042e+06	NA	279163	1.58368e+06	1.23909e+06
Q99L45	Q99L45	Eukaryotic translation initiation factor 2 subunit 2 (Eukaryotic translation initiation factor 2 subunit beta) (eIF-2-beta)	Eif2s2	NA	NA	NA	NA	1.76078e+06	1.69392e+06	1.07443e+06	1.88013e+06	NA	NA	NA	NA
Q99L47	Q99L47	Hsc70-interacting protein (Hip) (Protein FAM10A1) (Protein ST13 homolog)	St13	NA	NA	NA	NA	705200	879335	769861	834844	NA	NA	NA	NA
Q99LC3	Q99LC3	NADH dehydrogenase [ubiquinone] 1 alpha subcomplex subunit 10, mitochondrial (Complex I-42kD) (CI-42kD) (NADH-ubiquinone oxidoreductase 42 kDa subunit)	Ndufa10	NA	1.46361e+06	890627	774037	1.1602e+06	1.92344e+06	NA	1.29081e+06	1.90183e+06	886692	1.45485e+06	1.33265e+06
Q99LC5	Q99LC5	Electron transfer flavoprotein subunit alpha, mitochondrial (Alpha-ETF)	Etfa	NA	NA	NA	NA	1.7113e+06	2.30907e+06	984229	1.28142e+06	2.04255e+06	986785	7.40992e+06	1.72925e+06
Q99LE6	Q99LE6	ATP-binding cassette sub-family F member 2	Abcf2	NA	NA	NA	NA	520334	708837	273664	912683	579491	NA	3.17713e+06	517250
Q99LF4	Q99LF4	RNA-splicing ligase RtcB homolog (EC 6.5.1.8) (3'-phosphate/5'-hydroxy nucleic acid ligase) (Focal adhesion-associated protein) (FAAP)	Rtcb	NA	NA	NA	NA	1.06703e+06	NA	952541	NA	1.57684e+06	1.25168e+06	961923	790805
Q99LH1	Q99LH1	Nucleolar GTP-binding protein 2	Gnl2	NA	NA	NA	NA	1.63144e+07	1.4312e+07	7.70429e+06	2.56812e+07	649126	202345	375801	284515
Q99LI5	Q99LI5	Zinc finger protein 281	Znf281	NA	NA	NA	NA	1.79623e+06	1.6442e+06	1.15803e+06	1.72321e+06	1.68527e+07	2.21196e+06	1.95961e+07	2.09952e+07
Q99LI9	Q99LI9	Polyribonucleotide 5'-hydroxyl-kinase Clp1 (EC 2.7.1.78) (Polyadenylation factor Clp1) (Polynucleotide kinase Clp1) (Pre-mRNA cleavage complex II protein Clp1)	Clp1	NA	NA	NA	NA	686993	495821	906249	1.07785e+06	NA	NA	NA	NA
Q99LJ0	Q99LJ0	CTTNBP2 N-terminal-like protein	Cttnbp2nl	NA	NA	NA	NA	6.87093e+06	1.11553e+07	4.55539e+06	6.65845e+06	1.24206e+06	NA	NA	1.16508e+06
Q99LP6	Q99LP6	GrpE protein homolog 1, mitochondrial (Mt-GrpE#1)	Grpel1	NA	NA	NA	NA	NA	NA	NA	NA	984021	NA	1.70581e+06	1.07449e+06
Q99M51	Q99M51	Cytoplasmic protein NCK1 (NCK adaptor protein 1) (Nck-1)	Nck1	NA	NA	NA	NA	NA	NA	NA	NA	NA	NA	NA	NA
Q99MD9-1	Q99MD9	Nuclear autoantigenic sperm protein (NASP)	Nasp	NA	NA	NA	NA	1.34404e+06	1.4603e+06	1.13618e+06	1107732	NA	NA	NA	NA
Q99ME2	Q99ME2	WD repeat-containing protein 6 (mWDR6)	Wdr6	NA	NA	NA	NA	NA	NA	NA	NA	7.97048e+06	843346	7.94268e+06	4.46733e+06
Q99ME9	Q99ME9	GTP-binding protein 4 (Chronic renal failure gene protein) (GTP-binding protein NGB) (Nucleolar GTP-binding protein 1)	Gtpbp4	NA	NA	NA	NA	NA	NA	NA	NA	NA	329916	1.25439e+06	NA
Q99MI1	Q99MI1	ELKS/Rab6-interacting/CAST family member 1 (ERC-1) (CAZ-associated structural protein 2) (CAST2) (Rab6-interacting protein 2)	Erc1	NA	NA	NA	NA	616089	822852	310824	NA	3.59501e+06	1.21737e+06	1.36366e+06	1.5515e+06
Q99MJ9	Q99MJ9	ATP-dependent RNA helicase DDX50 (EC 3.6.4.13) (DEAD box protein 50) (Gu-beta) (Nucleolar protein Gu2)	Ddx50	NA	NA	NA	NA	742572	754506	720811	659058	NA	NA	NA	NA
Q99MK8	Q99MK8	Beta-adrenergic receptor kinase 1 (Beta-ARK-1) (EC 2.7.11.15) (G-protein-coupled receptor kinase 2)	Grk2	NA	NA	NA	NA	NA	NA	NA	NA	3.84089e+06	NA	897763	1269919
Q99MN9	Q99MN9	Propionyl-CoA carboxylase beta chain, mitochondrial (PCCase subunit beta) (EC 6.4.1.3) (Propanoyl-CoA:carbon dioxide ligase subunit beta)	Pccb	6.98194e+07	3.57474e+08	3.17462e+08	4.48277e+08	3.17763e+08	2.75737e+08	3.39956e+08	4.38248e+08	1.16395e+08	1.63794e+08	6.21422e+08	3.26035e+08
Q99MR6-1	Q99MR6	Serrate RNA effector molecule homolog (Arsenite-resistance protein 2)	Srrt	NA	NA	NA	NA	2.20255e+06	2166112	889104	1256901	NA	NA	NA	NA
Q99MR8	Q99MR8	Methylcrotonoyl-CoA carboxylase subunit alpha, mitochondrial (MCCase subunit alpha) (EC 6.4.1.4) (3-methylcrotonyl-CoA carboxylase 1) (3-methylcrotonyl-CoA carboxylase biotin-containing subunit) (3-methylcrotonyl-CoA:carbon dioxide ligase subunit alpha)	Mccc1	4.58401e+09	1.05759e+10	9.32532e+09	1.10146e+10	9.5515e+09	1.22769e+10	8.4876e+09	9.66136e+09	7.72117e+09	7.54263e+09	1.72155e+10	9.13307e+09
Q99MU3	Q99MU3	Double-stranded RNA-specific adenosine deaminase (DRADA) (EC 3.5.4.37) (RNA adenosine deaminase 1)	Adar	NA	NA	NA	NA	6.74738e+06	7.35982e+06	4.8403e+06	6.69814e+06	1.51549e+06	128154	2.44753e+06	773648
Q99MZ3	Q99MZ3	Carbohydrate-responsive element-binding protein (ChREBP) (MLX interactor) (MLX-interacting protein-like) (Williams-Beuren syndrome chromosomal region 14 protein homolog)	Mlxipl	NA	NA	NA	NA	4.40552e+06	5555535	NA	4.8137e+06	NA	NA	NA	NA
Q99N85	Q99N85	28S ribosomal protein S18a, mitochondrial (MRP-S18-a) (Mrps18a) (S18mt-a) (28S ribosomal protein S18-3, mitochondrial) (MRP-S18-3)	Mrps18a	NA	NA	NA	NA	1.11388e+06	704726	NA	469064	NA	NA	NA	NA
Q99N87	Q99N87	28S ribosomal protein S5, mitochondrial (MRP-S5) (S5mt)	Mrps5	213287	654515	482566	675213	2.87738e+06	2.8792e+06	1750754	1.72557e+06	1.35205e+06	1.33381e+06	1476836	1.50344e+06
Q99N92	Q99N92	39S ribosomal protein L27, mitochondrial (L27mt) (MRP-L27)	Mrpl27	NA	NA	NA	NA	1.4149e+06	1.18989e+06	650483	880003	2.45942e+06	NA	3824788	1.69341e+06
Q99NB9	Q99NB9	Splicing factor 3B subunit 1 (Pre-mRNA-splicing factor SF3b 155 kDa subunit) (SF3b155) (Spliceosome-associated protein 155) (SAP 155)	Sf3b1	NA	NA	NA	NA	2.81448e+08	2.97234e+08	1.43119e+08	2.16393e+08	3.0516e+06	869681	1.33818e+07	2.94764e+06
Q99NE9-1	Q99NE9	Pre-B-cell leukemia transcription factor 4 (Homeobox protein PBX4)	Pbx4	NA	NA	NA	NA	1.22989e+06	3.28012e+06	1.5964e+06	2.02187e+06	NA	NA	NA	NA
Q99NH0-1	Q99NH0	Ankyrin repeat domain-containing protein 17 (Ankyrin repeat domain-containing protein FOE) (Gene trap ankyrin repeat protein)	Ankrd17	NA	NA	NA	NA	2.16592e+06	2.49977e+06	1713652	2.37786e+06	NA	NA	NA	NA
Q99NH2	Q99NH2	Partitioning defective 3 homolog (PAR-3) (PARD-3) (Atypical PKC isotype-specific-interacting protein) (ASIP) (Ephrin-interacting protein) (PHIP)	Pard3	NA	NA	NA	NA	755208	2.4032e+06	850471	1.03339e+06	NA	NA	NA	NA
Q99NH2-4	Q99NH2	Partitioning defective 3 homolog (PAR-3) (PARD-3) (Atypical PKC isotype-specific-interacting protein) (ASIP) (Ephrin-interacting protein) (PHIP)	Pard3	NA	NA	NA	NA	NA	NA	NA	NA	2.06902e+06	536354	1.4792e+06	2.86651e+06
Q99P72-2	Q99P72	Reticulon-4 (Neurite outgrowth inhibitor) (Nogo protein)	Rtn4	NA	NA	NA	NA	1.46641e+09	2.03878e+09	7.49082e+08	1.11955e+09	1.1247e+07	1.37973e+06	4.63841e+07	1.07847e+07
Q99P88	Q99P88	Nuclear pore complex protein Nup155 (155 kDa nucleoporin) (Nucleoporin Nup155)	Nup155	NA	NA	NA	NA	NA	NA	NA	NA	NA	227804	1.85806e+06	NA
Q99PL5-1	Q99PL5	Ribosome-binding protein 1 (Ribosome receptor protein) (RRp) (mRRp)	Rrbp1	NA	NA	NA	NA	2.00867e+08	2.35457e+08	1.29385e+08	1.59356e+08	234134	153688	NA	293890
Q99PP7	Q99PP7	E3 ubiquitin-protein ligase TRIM33 (EC 2.3.2.27) (Ectodermin homolog) (RING-type E3 ubiquitin transferase TRIM33) (Transcription intermediary factor 1-gamma) (TIF1-gamma) (Tripartite motif-containing protein 33)	Trim33	NA	NA	NA	NA	6.32274e+06	7.38848e+06	7.2975e+06	7.28602e+06	NA	NA	NA	NA
Q99PU8	Q99PU8	ATP-dependent RNA helicase DHX30 (EC 3.6.4.13) (DEAH box protein 30)	Dhx30	NA	NA	NA	NA	499087	597775	309553	NA	NA	NA	840905	NA
Q99PV0	Q99PV0	Pre-mRNA-processing-splicing factor 8 (Splicing factor Prp8)	Prpf8	NA	NA	NA	NA	8.51377e+06	5.11699e+06	2.92956e+06	2.87793e+06	520659	121762	3.02969e+06	826452
Q9CPR4	Q9CPR4	60S ribosomal protein L17	Rpl17	NA	NA	NA	NA	1.31941e+07	8.32134e+06	907402	5.16023e+06	1.36198e+07	2.92882e+06	1.31297e+07	1.11955e+07
Q9CPR5	Q9CPR5	39S ribosomal protein L15, mitochondrial (L15mt) (MRP-L15)	Mrpl15	NA	1.43924e+06	1484215	NA	4.07032e+07	13864407	2.61345e+07	2.73967e+07	4.71964e+06	NA	2.33315e+06	3.57506e+06
Q9CPR7	Q9CPR7	Suppressor of IKBKE 1 (Suppressor of IKK-epsilon)	Sike1	NA	NA	NA	NA	5.20452e+06	7571625	603348	3.00749e+06	NA	NA	NA	NA
Q9CPY1	Q9CPY1	39S ribosomal protein L51, mitochondrial (L51mt) (MRP-L51) (bMRP-64) (bMRP64)	Mrpl51	NA	NA	NA	NA	467043	697904	NA	423757	NA	NA	NA	NA
Q9CQ22	Q9CQ22	Ragulator complex protein LAMTOR1 (Late endosomal/lysosomal adaptor and MAPK and MTOR activator 1) (Lipid raft adaptor protein p18)	Lamtor1	NA	NA	NA	NA	NA	NA	NA	728273	NA	NA	NA	NA
Q9CQ46	Q9CQ46	Dynein regulatory complex protein 8 (EF-hand calcium-binding domain-containing protein 2)	Efcab2	NA	NA	NA	NA	7634399	6.77869e+06	3771207	4780032	3.39758e+06	NA	387265	1464856
Q9CQ48	Q9CQ48	NudC domain-containing protein 2	Nudcd2	96607.9	31580.4	48648.6	77078.5	NA	NA	NA	NA	NA	NA	NA	NA
Q9CQ62	Q9CQ62	2,4-dienoyl-CoA reductase [(3E)-enoyl-CoA-producing], mitochondrial (EC 1.3.1.124) (2,4-dienoyl-CoA reductase [NADPH]) (4-enoyl-CoA reductase [NADPH])	Decr1	NA	NA	NA	NA	513770	302939	286722	485940	973495	597265	1.4569e+06	900742
Q9CQ65	Q9CQ65	S-methyl-5'-thioadenosine phosphorylase (EC 2.4.2.28) (5'-methylthioadenosine phosphorylase) (MTA phosphorylase) (MTAP) (MTAPase)	Mtap	NA	NA	NA	NA	NA	882420	402319	502293	NA	NA	333072	636291
Q9CQB2	Q9CQB2	MAPK regulated corepressor interacting protein 2 (Protein FAM195A)	Mcrip2	NA	NA	NA	NA	1.02329e+06	1.09095e+06	460720	699433	NA	NA	NA	NA
Q9CQC6	Q9CQC6	eIF5-mimic protein 2 (Basic leucine zipper and W2 domain-containing protein 1)	Bzw1	NA	NA	NA	NA	NA	NA	NA	NA	565150	451418	3.00284e+06	330398
Q9CQD1	Q9CQD1	Ras-related protein Rab-5A (EC 3.6.5.2)	Rab5a	NA	NA	NA	NA	419371	788956	156906	345057	214790	NA	NA	NA
Q9CQF3	Q9CQF3	Cleavage and polyadenylation specificity factor subunit 5 (Nucleoside diphosphate-linked moiety X motif 21) (Nudix motif 21) (Nudix hydrolase 21)	Nudt21	NA	NA	NA	NA	6358462	7400170	NA	2.8424e+06	NA	NA	NA	NA
Q9CQG2	Q9CQG2	RNA N6-adenosine-methyltransferase METTL16 (Methyltransferase 10 domain-containing protein) (Methyltransferase-like protein 16) (N6-adenosine-methyltransferase METTL16) (EC 2.1.1.348) (U6 small nuclear RNA (adenine-(43)-N(6))-methyltransferase) (EC 2.1.1.346)	Mettl16	NA	NA	NA	NA	1.75466e+06	2325908	1.19045e+06	1.61356e+06	NA	NA	NA	NA
Q9CQN1	Q9CQN1	Heat shock protein 75 kDa, mitochondrial (HSP 75) (TNFR-associated protein 1) (Tumor necrosis factor type 1 receptor-associated protein) (TRAP-1)	Trap1	NA	NA	NA	NA	1.32377e+07	1.83714e+07	4.56464e+06	6.60386e+06	1.69943e+07	4.39228e+06	2.72882e+07	1.04554e+07
Q9CQQ7	Q9CQQ7	ATP synthase F(0) complex subunit B1, mitochondrial (ATP synthase peripheral stalk-membrane subunit b) (ATP synthase subunit b) (ATPase subunit b)	Atp5pb	1.18649e+06	1.342e+06	1.12146e+06	1.11695e+06	3.51869e+06	4.01273e+06	2.58368e+06	3.28913e+06	3.52086e+06	2.1223e+06	1.08065e+06	3.20192e+06
Q9CQR2	Q9CQR2	40S ribosomal protein S21	Rps21	NA	NA	NA	NA	3.13894e+06	2.26826e+06	2.08315e+06	2.31211e+06	775634	843135	3469566	811826
Q9CQS8	Q9CQS8	Protein transport protein Sec61 subunit beta	Sec61b	2.49348e+06	3.28736e+06	1.32203e+06	2.61107e+06	6.71014e+06	4.53847e+06	3.3288e+06	4.03121e+06	4.6985e+06	2.42593e+06	6.48216e+06	2.10912e+06
Q9CQT2	Q9CQT2	RNA-binding protein 7 (RNA-binding motif protein 7)	Rbm7	NA	NA	NA	NA	NA	NA	NA	NA	NA	NA	NA	NA
Q9CQV8-1	Q9CQV8	14-3-3 protein beta/alpha (Protein kinase C inhibitor protein 1) (KCIP-1) [Cleaved into: 14-3-3 protein beta/alpha, N-terminally processed]	Ywhab	NA	NA	NA	NA	NA	NA	NA	NA	385119	148278	NA	168347
Q9CQW2	Q9CQW2	ADP-ribosylation factor-like protein 8B (EC 3.6.5.2) (ADP-ribosylation factor-like protein 10C) (Novel small G protein indispensable for equal chromosome segregation 1)	Arl8b	NA	NA	NA	NA	2.45684e+06	2.61869e+06	2.09592e+06	2.10153e+06	1.11644e+07	92433.8	9.46952e+06	954253
Q9CQW9	Q9CQW9	Interferon-induced transmembrane protein 3 (Dispanin subfamily A member 2b) (DSPA2b) (Fragilis protein) (Interferon-inducible protein 15) (Mouse ifitm-like protein 1) (Mil-1)	Ifitm3	NA	NA	NA	NA	NA	1.68774e+06	NA	329685	NA	NA	NA	NA
Q9CQX2	Q9CQX2	Cytochrome b5 type B (Cytochrome b5 outer mitochondrial membrane isoform)	Cyb5b	437905	336950	157105	225112	4.16094e+06	4.04324e+06	2338326	3.73654e+06	NA	NA	1.80059e+06	NA
Q9CQZ0	Q9CQZ0	ORM1-like protein 2	Ormdl2	NA	NA	NA	NA	8675110	NA	6.04861e+06	NA	NA	NA	NA	NA
Q9CR29-1	Q9CR29	Coiled-coil domain-containing protein 43	Ccdc43	NA	NA	NA	NA	2.43915e+06	1.71364e+06	1.91109e+06	1.55043e+06	NA	NA	NA	NA
Q9CR47	Q9CR47	Ribosome biogenesis protein NSA2 homolog (L-name-related protein 42) (LNR42) (TGF-beta-inducible nuclear protein 1)	Nsa2	NA	NA	NA	NA	1470680	2.54134e+06	756956	863903	NA	NA	NA	NA
Q9CR51	Q9CR51	V-type proton ATPase subunit G 1 (V-ATPase subunit G 1) (V-ATPase 13 kDa subunit 1) (Vacuolar proton pump subunit G 1)	Atp6v1g1	NA	NA	NA	NA	208459	497389	129743	223400	NA	NA	NA	NA
Q9CR57	Q9CR57	60S ribosomal protein L14	Rpl14	1.97335e+07	22517426	1.39954e+07	1.63221e+07	1.1484e+08	1.05607e+08	7.80731e+07	8.94315e+07	5.81564e+07	1.38458e+07	7.85035e+07	5.75414e+07
Q9CR62	Q9CR62	Mitochondrial 2-oxoglutarate/malate carrier protein (OGCP) (alpha-oxoglutarate carrier) (Solute carrier family 25 member 11) (SLC25A11)	Slc25a11	NA	NA	NA	NA	1.07841e+06	7561976	2444417	4324490	2.81069e+06	NA	1.37089e+07	2.72627e+06
Q9CR67	Q9CR67	Transmembrane protein 33 (Protein DB83)	Tmem33	NA	NA	NA	NA	NA	NA	NA	NA	1.55365e+07	1.14169e+06	3.36368e+07	8.08227e+06
Q9CR68	Q9CR68	Cytochrome b-c1 complex subunit Rieske, mitochondrial (EC 7.1.1.8) (Complex III subunit 5) (Cytochrome b-c1 complex subunit 5) (Rieske iron-sulfur protein) (RISP) (Rieske protein UQCRFS1) (Ubiquinol-cytochrome c reductase iron-sulfur subunit) [Cleaved into: Cytochrome b-c1 complex subunit 9 (Su9) (Subunit 9) (8 kDa subunit 9) (Complex III subunit IX) (Cytochrome b-c1 complex subunit 11) (UQCRFS1 …	Uqcrfs1	NA	NA	NA	NA	6581612	7541819	4.20029e+06	NA	7.64902e+06	3.36057e+06	6.32259e+06	6.23332e+06
Q9CRA8	Q9CRA8	Exosome complex component RRP46 (Exosome component 5) (Ribosomal RNA-processing protein 46)	Exosc5	NA	NA	NA	NA	267537	NA	321460	377502	NA	NA	NA	NA
Q9CRA9-1	Q9CRA9	FGFR1 oncogene partner 2 homolog	Fgfr1op2	NA	NA	NA	NA	2258453	1.97786e+06	329630	NA	NA	NA	NA	NA
Q9CRD0-1	Q9CRD0	OCIA domain-containing protein 1	Ociad1	NA	NA	NA	NA	NA	NA	NA	NA	NA	NA	NA	NA
Q9CS00	Q9CS00	Splicing factor Cactin	Cactin	NA	NA	NA	NA	NA	2915001	NA	NA	1.69851e+06	NA	NA	NA
Q9CSN1	Q9CSN1	SNW domain-containing protein 1 (Nuclear protein SkiP) (Ski-interacting protein)	Snw1	NA	NA	NA	NA	9.04714e+07	1.17758e+08	5.21862e+07	6.41794e+07	1.35419e+08	4.73685e+07	1.11481e+08	8.4016e+07
Q9CT10	Q9CT10	Ran-binding protein 3 (RanBP3)	Ranbp3	NA	NA	NA	NA	1477904	1.99325e+06	1237339	1.56045e+06	NA	NA	NA	NA
Q9CU62	Q9CU62	Structural maintenance of chromosomes protein 1A (SMC protein 1A) (SMC-1-alpha) (SMC-1A) (Chromosome segregation protein SmcB) (Sb1.8)	Smc1a	87273.9	198851	162137	275514	1.44903e+06	1.4435e+06	1.09347e+06	1.16038e+06	425206	325214	528820	564417
Q9CU65	Q9CU65	Zinc finger MYM-type protein 2 (Zinc finger protein 198)	Zmym2	NA	NA	NA	NA	4.2982e+06	3.36711e+06	2.59064e+06	3.24055e+06	NA	NA	NA	NA
Q9CWE0	Q9CWE0	Mitochondrial fission regulator 1-like	Mtfr1l	NA	NA	NA	NA	NA	NA	NA	NA	NA	NA	NA	NA
Q9CWK3	Q9CWK3	CD2 antigen cytoplasmic tail-binding protein 2 (CD2 cytoplasmic domain-binding protein 2) (CD2 tail-binding protein 2)	Cd2bp2	NA	NA	NA	NA	2.89653e+07	1.88924e+07	1.31772e+07	1.6636e+07	1.36023e+06	467465	675696	697890
Q9CWN7	Q9CWN7	CCR4-NOT transcription complex subunit 11	Cnot11	NA	NA	NA	NA	NA	NA	NA	NA	528432	34801.1	1197225	75300.5
Q9CWU5-1	Q9CWU5	KH domain-containing protein 3 (Protein Filia)	Khdc3	89022.8	NA	17319.4	31673.8	NA	NA	NA	NA	NA	NA	NA	NA
Q9CX00	Q9CX00	IST1 homolog (Charged multivesicular body protein 8) (CHMP8)	Ist1	NA	NA	NA	NA	2.67964e+06	2052615	1.56453e+06	2.07624e+06	7.62601e+06	789120	5.26841e+06	2.64371e+06
Q9CX34	Q9CX34	Protein SGT1 homolog (Suppressor of G2 allele of SKP1 homolog)	Sugt1	NA	NA	NA	NA	1.36498e+07	1.63451e+07	8.69718e+06	1.11422e+07	879047	424311	248257	527428
Q9CX56	Q9CX56	26S proteasome non-ATPase regulatory subunit 8 (26S proteasome regulatory subunit RPN12) (26S proteasome regulatory subunit S14)	Psmd8	NA	NA	NA	NA	4.99289e+06	3.44384e+06	2.88626e+06	3.04854e+06	NA	NA	NA	NA
Q9CX86	Q9CX86	Heterogeneous nuclear ribonucleoprotein A0 (hnRNP A0)	Hnrnpa0	NA	NA	NA	NA	1.30798e+07	1.23804e+07	4.80359e+06	5.43511e+06	7554599	3.0214e+06	1.26738e+07	4.92204e+06
Q9CX99	Q9CX99	GRB2-related adapter protein	Grap	NA	NA	NA	NA	NA	NA	NA	NA	NA	NA	4371371	2.36914e+06
Q9CXG3	Q9CXG3	Peptidyl-prolyl cis-trans isomerase-like 4 (PPIase) (EC 5.2.1.8) (Cyclophilin-like protein PPIL4) (Rotamase PPIL4)	Ppil4	NA	NA	NA	NA	NA	NA	NA	NA	NA	NA	NA	NA
Q9CXK8	Q9CXK8	60S ribosome subunit biogenesis protein NIP7 homolog (Nucleolar pre-rRNA processing protein NIP7) (PEachy) (kDa93)	Nip7	NA	NA	NA	NA	6420981	1.11472e+06	NA	NA	8403025	2.10749e+06	NA	NA
Q9CXK9-1	Q9CXK9	RNA-binding protein 33 (Proline-rich protein 8) (RNA-binding motif protein 33)	Rbm33	NA	NA	NA	NA	4.62616e+06	2.50196e+06	2.58115e+06	2.79436e+06	1.18847e+06	169928	1.10247e+06	1.43021e+06
Q9CXT8	Q9CXT8	Mitochondrial-processing peptidase subunit beta (EC 3.4.24.64) (Beta-MPP) (P-52)	Pmpcb	NA	NA	NA	NA	1.11667e+07	1.50997e+07	8.04064e+06	1.04295e+07	2.8198e+06	948907	5.00361e+06	3.90318e+06
Q9CXW3	Q9CXW3	Calcyclin-binding protein (CacyBP) (Siah-interacting protein)	Cacybp	NA	NA	NA	NA	NA	NA	NA	NA	917113	285629	4.03442e+06	494718
Q9CXW4	Q9CXW4	60S ribosomal protein L11	Rpl11	NA	2.51711e+07	1.83925e+07	1.53298e+07	6.88672e+07	8.70364e+07	6.37253e+07	7.71398e+07	3.90876e+07	2.88503e+07	59897074	4.70621e+07
Q9CXY6	Q9CXY6	Interleukin enhancer-binding factor 2 (Nuclear factor of activated T-cells 45 kDa)	Ilf2	NA	NA	NA	NA	1.41492e+06	1.34943e+06	794034	1.69285e+06	NA	NA	NA	NA
Q9CXY9	Q9CXY9	GPI-anchor transamidase (GPI transamidase) (EC 3.-.-.-) (Phosphatidylinositol-glycan biosynthesis class K protein) (PIG-K)	Pigk	NA	NA	NA	NA	NA	NA	NA	NA	970785	NA	1.84473e+06	994851
Q9CY16	Q9CY16	28S ribosomal protein S28, mitochondrial (MRP-S28) (S28mt)	Mrps28	NA	NA	NA	NA	NA	NA	NA	NA	941223	204690	970996	357061
Q9CY27	Q9CY27	Very-long-chain enoyl-CoA reductase (EC 1.3.1.93) (Synaptic glycoprotein SC2) (Trans-2,3-enoyl-CoA reductase) (TER)	Tecr	NA	NA	NA	NA	4.65925e+06	4.5571e+06	1.50112e+06	2.42364e+06	1651211	1.13403e+08	507811	772577
Q9CY57	Q9CY57	Chromatin target of PRMT1 protein (Friend of PRMT1 protein) (Small arginine- and glycine-rich protein) (SRAG)	Chtop	NA	NA	NA	NA	1.03372e+06	906076	347164	157006	NA	NA	NA	NA
Q9CY58	Q9CY58	Plasminogen activator inhibitor 1 RNA-binding protein (PAI1 RNA-binding protein 1) (PAI-RBP1) (SERPINE1 mRNA-binding protein 1)	Serbp1	NA	NA	NA	NA	4.56315e+07	3.72751e+07	2.99991e+07	3.84159e+07	398275	191688	8.99967e+06	909856
Q9CYH6	Q9CYH6	Ribosome biogenesis regulatory protein homolog	Rrs1	NA	NA	NA	NA	1.02535e+06	1.01878e+06	NA	574113	NA	NA	NA	NA
Q9CYN2	Q9CYN2	Signal peptidase complex subunit 2 (Microsomal signal peptidase 25 kDa subunit) (SPase 25 kDa subunit)	Spcs2	NA	NA	NA	NA	NA	NA	NA	NA	NA	NA	2.81347e+06	424298
Q9CYX7	Q9CYX7	RRP15-like protein (Ribosomal RNA-processing protein 15)	Rrp15	NA	NA	NA	NA	1.47422e+07	2.45677e+07	5.53044e+06	8.43282e+06	NA	NA	NA	NA
Q9CYZ2	Q9CYZ2	Tumor protein D54 (Tumor protein D52-like 2)	Tpd52l2	NA	NA	NA	NA	4.54698e+07	8.20359e+07	3.23755e+07	3.66857e+07	373437	NA	NA	NA
Q9CZ13	Q9CZ13	Cytochrome b-c1 complex subunit 1, mitochondrial (Complex III subunit 1) (Core protein I) (Ubiquinol-cytochrome-c reductase complex core protein 1)	Uqcrc1	6.79489e+06	4.45614e+07	2.24675e+07	4.74942e+07	8.31176e+07	9.6227e+07	5.57317e+07	7.76261e+07	7.48624e+07	2.28464e+07	1.9915e+08	9.69361e+07
Q9CZ44-1	Q9CZ44	NSFL1 cofactor p47 (p97 cofactor p47)	Nsfl1c	NA	NA	NA	NA	6.14051e+08	1.84935e+08	8.85651e+07	1.50278e+08	1.05298e+07	932943	5.24694e+06	3.79998e+06
Q9CZD3	Q9CZD3	Glycine--tRNA ligase (EC 6.1.1.14) (Diadenosine tetraphosphate synthetase) (Ap4A synthetase) (EC 2.7.7.-) (Glycyl-tRNA synthetase 1) (GlyRS)	Gars1	NA	NA	NA	NA	3365920	6314056	2.40974e+06	2.79651e+06	4.88217e+06	367977	3.41388e+06	2910351
Q9CZE3	Q9CZE3	Ras-related protein Rab-32	Rab32	NA	NA	NA	NA	NA	NA	NA	NA	287710	162363	2.01674e+06	283596
Q9CZH8	Q9CZH8	Coiled-coil domain-containing protein 77	Ccdc77	NA	NA	NA	NA	NA	NA	NA	NA	930258	NA	NA	565111
Q9CZJ2	Q9CZJ2	Heat shock 70 kDa protein 12B	Hspa12b	NA	NA	NA	NA	1.41321e+07	1.78339e+07	6.59671e+06	1.01683e+07	1.17724e+07	1.6422e+06	1.90673e+07	8.6777e+06
Q9CZM2	Q9CZM2	60S ribosomal protein L15	Rpl15	374759	2.0611e+06	450280	1.74587e+06	2.6298e+07	28030375	2.05144e+07	2.68666e+07	32272793	9.16508e+06	5.44038e+07	3.70469e+07
Q9CZU3	Q9CZU3	Exosome RNA helicase MTR4 (EC 3.6.4.13) (ATP-dependent helicase SKIV2L2) (Superkiller viralicidic activity 2-like 2) (TRAMP-like complex helicase)	Mtrex	NA	NA	NA	NA	2.57027e+06	2.82621e+06	1.19749e+06	838701	NA	NA	NA	NA
Q9CZU6	Q9CZU6	Citrate synthase, mitochondrial (EC 2.3.3.1) (Citrate (Si)-synthase)	Cs	385523	505632	586938	787936	1.60545e+06	3.4351e+06	2.93606e+06	3.70301e+06	NA	NA	5.94206e+06	958981
Q9CZW5	Q9CZW5	Mitochondrial import receptor subunit TOM70 (Mitochondrial precursor proteins import receptor) (Translocase of outer membrane 70 kDa subunit) (Translocase of outer mitochondrial membrane protein 70)	Tomm70	NA	NA	NA	NA	2.47993e+06	3.4781e+06	1.48689e+06	1.54896e+06	6.48309e+06	2.83588e+06	8.07179e+06	4.57533e+06
Q9CZX5	Q9CZX5	PIN2/TERF1-interacting telomerase inhibitor 1 (67-11-3 protein) (LPTS1) (Liver-related putative tumor suppressor) (Pin2-interacting protein X1) (TRF1-interacting protein 1)	Pinx1	NA	NA	NA	NA	2.26352e+06	3.6472e+06	999196	1.10121e+06	NA	NA	NA	NA
Q9CZY3	Q9CZY3	Ubiquitin-conjugating enzyme E2 variant 1 (UEV-1) (CROC-1)	Ube2v1	NA	1.47208e+06	1.26122e+06	1.3205e+06	2.85602e+06	4.24279e+06	1.91089e+06	2082244	NA	1.89056e+06	NA	NA
Q9D051	Q9D051	Pyruvate dehydrogenase E1 component subunit beta, mitochondrial (PDHE1-B) (EC 1.2.4.1)	Pdhb	NA	925252	539403	NA	NA	NA	NA	NA	385032	505267	3.37707e+06	713136
Q9D0D5	Q9D0D5	General transcription factor IIE subunit 1 (General transcription factor IIE 56 kDa subunit) (Transcription initiation factor IIE subunit alpha) (TFIIE-alpha)	Gtf2e1	NA	NA	NA	NA	8278346	4.5073e+06	3.14112e+06	8.04477e+06	93516.6	NA	682549	103576
Q9D0E1	Q9D0E1	Heterogeneous nuclear ribonucleoprotein M (hnRNP M)	Hnrnpm	2332668	2.08351e+07	1.61695e+07	1.84938e+07	2.75536e+08	3.66744e+08	1.73973e+08	2.00844e+08	2.84521e+08	8.01373e+07	2.49961e+08	1.93298e+08
Q9D0F3	Q9D0F3	Protein ERGIC-53 (ER-Golgi intermediate compartment 53 kDa protein) (Lectin mannose-binding 1) (p58)	Lman1	NA	NA	NA	NA	241450	211188	NA	46540	NA	NA	NA	NA
Q9D0F6	Q9D0F6	Replication factor C subunit 5 (Activator 1 36 kDa subunit) (A1 36 kDa subunit) (Activator 1 subunit 5) (Replication factor C 36 kDa subunit) (RF-C 36 kDa subunit) (RFC36)	Rfc5	NA	NA	NA	NA	888456	361713	526100	668652	NA	NA	NA	NA
Q9D0I8	Q9D0I8	mRNA turnover protein 4 homolog (Ribosome assembly factor Mrto4)	Mrto4	NA	NA	NA	NA	NA	NA	NA	NA	290896	85683.6	468550	NA
Q9D0I9	Q9D0I9	Arginine--tRNA ligase, cytoplasmic (EC 6.1.1.19) (Arginyl-tRNA synthetase) (ArgRS)	Rars1	NA	NA	NA	NA	366641	3.89228e+06	2466771	4.07702e+06	1.47704e+07	200644	4.45311e+06	1.59572e+06
Q9D0K2	Q9D0K2	Succinyl-CoA:3-ketoacid coenzyme A transferase 1, mitochondrial (SCOT) (EC 2.8.3.5) (3-oxoacid CoA-transferase 1) (Somatic-type succinyl-CoA:3-oxoacid CoA-transferase) (SCOT-s) (Succinyl-CoA:3-oxoacid CoA transferase)	Oxct1	NA	2.36592e+06	3.35888e+06	1.63468e+06	NA	NA	NA	NA	1.01494e+06	1.16216e+06	4.15495e+06	1.0941e+06
Q9D0L7	Q9D0L7	Armadillo repeat-containing protein 10	Armc10	NA	NA	NA	NA	1069372	NA	825636	1.06697e+06	NA	NA	NA	NA
Q9D0R2	Q9D0R2	Threonine--tRNA ligase 1, cytoplasmic (EC 6.1.1.3) (Threonine--tRNA ligase, cytoplasmic) (Threonyl-tRNA synthetase) (ThrRS) (Threonyl-tRNA synthetase 1)	Tars1	NA	NA	NA	NA	NA	NA	NA	NA	497143	NA	9696146	591318
Q9D0R4	Q9D0R4	Probable ATP-dependent RNA helicase DDX56 (EC 3.6.4.13) (ATP-dependent 61 kDa nucleolar RNA helicase) (DEAD box protein 56)	Ddx56	NA	NA	NA	NA	902778	1.05098e+06	NA	483120	NA	NA	NA	NA
Q9D0R8	Q9D0R8	Protein LSM12	Lsm12	NA	NA	NA	NA	1.03795e+06	977079	702957	990131	NA	NA	NA	NA
Q9D0S9	Q9D0S9	Adenosine 5'-monophosphoramidase HINT2 (EC 3.9.1.-) (HINT-3) (Histidine triad nucleotide-binding protein 2, mitochondrial) (HINT-2)	Hint2	329359	NA	NA	NA	NA	NA	NA	NA	NA	NA	NA	NA
Q9D0T1	Q9D0T1	NHP2-like protein 1 (Fertilization antigen 1) (FA-1) (High mobility group-like nuclear protein 2 homolog 1) (Sperm-specific antigen 1) (U4/U6.U5 small nuclear ribonucleoprotein SNU13) (U4/U6.U5 tri-snRNP 15.5 kDa protein) [Cleaved into: NHP2-like protein 1, N-terminally processed]	Snu13	NA	2.38884e+06	2151262	1.94244e+06	1.41271e+07	1.47596e+07	11866347	1.11025e+07	5.50836e+06	1.28568e+06	11243151	6.78944e+06
Q9D123-1	Q9D123	Insulin-like growth factor-binding protein 3 receptor (IGFBP-3R) (Transmembrane protein 219)	Tmem219	NA	NA	NA	NA	NA	NA	NA	NA	680478	NA	633047	631459
Q9D125	Q9D125	28S ribosomal protein S25, mitochondrial (MRP-S25) (S25mt)	Mrps25	NA	NA	NA	NA	NA	NA	NA	NA	NA	NA	NA	NA
Q9D168	Q9D168	Integrator complex subunit 12 (Int12) (PHD finger protein 22)	Ints12	NA	NA	NA	NA	8.4249e+07	8.32085e+07	4.64817e+07	6.60169e+07	2.31309e+06	2538398	3.95418e+06	3.93292e+06
Q9D172	Q9D172	Glutamine amidotransferase-like class 1 domain-containing protein 3, mitochondrial	Gatd3	NA	153829	557182	493499	NA	1865065	482738	479336	NA	NA	NA	NA
Q9D1B9	Q9D1B9	39S ribosomal protein L28, mitochondrial (L28mt) (MRP-L28)	Mrpl28	NA	NA	NA	NA	NA	NA	NA	NA	505105	NA	907232	215504
Q9D1C8	Q9D1C8	Vacuolar protein sorting-associated protein 28 homolog (Caspase-activated DNase inhibitor that interacts with ASK1) (CIIA) (ESCRT-I complex subunit VPS28)	Vps28	NA	NA	NA	NA	NA	NA	NA	NA	NA	NA	NA	NA
Q9D1E6	Q9D1E6	Tubulin-folding cofactor B (Cytoskeleton-associated protein 1) (Cytoskeleton-associated protein CKAPI) (Tubulin-specific chaperone B)	Tbcb	NA	NA	NA	NA	1.17517e+06	1271109	541427	844068	815475	41832.1	1.85042e+06	563804
Q9D1G1	Q9D1G1	Ras-related protein Rab-1B (EC 3.6.5.2)	Rab1b	NA	NA	NA	NA	752129	691938	437495	603538	687799	NA	1995920	485846
Q9D1H8	Q9D1H8	39S ribosomal protein L53, mitochondrial (L53mt) (MRP-L53)	Mrpl53	NA	NA	NA	NA	446060	522135	294848	289768	390160	NA	NA	309687
Q9D1I6	Q9D1I6	39S ribosomal protein L14, mitochondrial (L14mt) (MRP-L14)	Mrpl14	NA	NA	NA	NA	NA	NA	NA	710747	NA	NA	NA	NA
Q9D1J3	Q9D1J3	SAP domain-containing ribonucleoprotein (Nuclear protein Hcc-1)	Sarnp	NA	NA	NA	NA	3.76994e+06	4.54156e+06	2.39628e+06	3.03958e+06	NA	NA	NA	NA
Q9D1L9	Q9D1L9	Ragulator complex protein LAMTOR5 (Late endosomal/lysosomal adaptor and MAPK and MTOR activator 5)	Lamtor5	NA	NA	NA	NA	2.051e+06	NA	NA	1.40984e+06	NA	NA	NA	NA
Q9D1P4	Q9D1P4	Cysteine and histidine-rich domain-containing protein 1 (CHORD domain-containing protein 1) (CHORD-containing protein 1) (Chp-1) (Protein morgana)	Chordc1	NA	NA	NA	NA	2.58776e+06	3.86065e+06	1.56311e+06	1.74461e+06	598438	NA	302147	599729
Q9D1R9	Q9D1R9	60S ribosomal protein L34	Rpl34	NA	7.56277e+06	3.60333e+06	4.60104e+06	3.41934e+07	3.54564e+07	2.66523e+07	3.31376e+07	2.88687e+07	1.66767e+07	4.13018e+07	3.59826e+07
Q9D2D7-1	Q9D2D7	Zinc finger protein 687	Znf687	NA	NA	NA	NA	1.02523e+06	1.07605e+06	483808	605014	NA	NA	NA	NA
Q9D2G5-1	Q9D2G5	Synaptojanin-2 (EC 3.1.3.36) (Synaptic inositol 1,4,5-trisphosphate 5-phosphatase 2)	Synj2	NA	NA	NA	NA	NA	NA	NA	NA	NA	NA	NA	NA
Q9D2H6-1	Q9D2H6	Transcription factor Sp2	Sp2	NA	NA	NA	NA	1.8201e+06	1.21392e+06	1.05446e+06	1.20656e+06	NA	NA	NA	NA
Q9D2R0	Q9D2R0	Acetoacetyl-CoA synthetase (EC 6.2.1.16)	Aacs	NA	NA	NA	NA	7.56068e+06	9.91354e+06	3866397	5.08386e+06	NA	NA	NA	NA
Q9D2U9	Q9D2U9	H2B.U histone 2 (Histone H2B type 3-A)	H2bu2	NA	NA	NA	NA	1.33149e+06	1.5108e+06	NA	1.52125e+06	NA	NA	NA	NA
Q9D2V8	Q9D2V8	Major facilitator superfamily domain-containing protein 10 (Tetracycline transporter-like protein)	Mfsd10	NA	NA	NA	NA	NA	NA	NA	NA	146483	NA	1.3054e+06	165793
Q9D2Y4-1	Q9D2Y4	Mixed lineage kinase domain-like protein	Mlkl	NA	NA	NA	NA	NA	NA	NA	NA	1.12737e+06	285481	979408	90414.1
Q9D3E6	Q9D3E6	Cohesin subunit SA-1 (SCC3 homolog 1) (Stromal antigen 1)	Stag1	NA	NA	NA	NA	501017	409304	71055.2	NA	NA	NA	NA	NA
Q9D478	Q9D478	Protein BCAP (Basal body centriole-associated protein) (Outer dense fiber protein 2-like)	Odf2l	NA	NA	NA	NA	5242271	5.75645e+06	3.2886e+06	3.64572e+06	NA	NA	NA	NA
Q9D4H2	Q9D4H2	GRIP and coiled-coil domain-containing protein 1 (Golgi coiled-coil protein 1)	Gcc1	NA	NA	NA	NA	NA	NA	NA	NA	803996	NA	226946	419116
Q9D4H4	Q9D4H4	Angiomotin-like protein 1 (junction-enriched and -associated protein) (JEAP)	Amotl1	NA	NA	NA	NA	3374130	5.12179e+06	1.61904e+06	1.63756e+06	3.99134e+07	1.31159e+07	3.15718e+07	3.62642e+07
Q9D4H9	Q9D4H9	PHD finger protein 14	Phf14	NA	44671868	33178260	39997472	1.00634e+06	1.52516e+06	735042	927472	NA	NA	NA	NA
Q9D517	Q9D517	1-acyl-sn-glycerol-3-phosphate acyltransferase gamma (EC 2.3.1.51) (1-acylglycerol-3-phosphate O-acyltransferase 3) (1-AGP acyltransferase 3) (1-AGPAT 3) (Lysophosphatidic acid acyltransferase gamma) (LPAAT-gamma)	Agpat3	NA	NA	NA	NA	NA	NA	NA	NA	2.00781e+06	NA	1.47364e+06	2.47877e+06
Q9D554	Q9D554	Splicing factor 3A subunit 3 (SF3a60) (Spliceosome-associated protein 61) (SAP 61)	Sf3a3	NA	NA	NA	NA	1130964	1.02338e+06	749416	926645	300977	195487	NA	332132
Q9D5P4	Q9D5P4	Adenosine deaminase domain-containing protein 2	Adad2	NA	NA	NA	NA	1.24827e+08	1.61844e+08	3.35326e+07	168901972	NA	NA	NA	NA
Q9D5R2	Q9D5R2	WD repeat-containing protein 20	Wdr20	NA	NA	NA	NA	548650	703665	358223	387933	1.92834e+07	1.55307e+06	2.30237e+07	1.39457e+07
Q9D5T0	Q9D5T0	Outer mitochondrial transmembrane helix translocase (EC 7.4.2.-) (ATPase family AAA domain-containing protein 1) (Thorase)	Atad1	NA	NA	NA	NA	NA	NA	NA	NA	NA	280167	170675	601010
Q9D666-1	Q9D666	SUN domain-containing protein 1 (Protein unc-84 homolog A) (Sad1/unc-84 protein-like 1)	Sun1	NA	NA	NA	NA	424101	366748	528504	463285	NA	NA	NA	NA
Q9D6K5	Q9D6K5	Synaptojanin-2-binding protein (Activin receptor-interacting protein 2) (Activin receptor-interacting protein 4) (Mitochondrial outer membrane protein 25)	Synj2bp	NA	NA	NA	NA	NA	NA	NA	NA	NA	NA	744775	NA
Q9D6K9	Q9D6K9	Ceramide synthase 5 (CerS5) (LAG1 longevity assurance homolog 5) (Sphingoid base N-palmitoyltransferase CERS5) (EC 2.3.1.291) (Sphingosine N-acyltransferase CERS5) (EC 2.3.1.24) (Translocating chain-associating membrane protein homolog 4) (TRAM homolog 4)	Cers5	NA	NA	NA	NA	NA	NA	NA	NA	NA	NA	1.17127e+06	NA
Q9D6M3	Q9D6M3	Mitochondrial glutamate carrier 1 (GC-1) (Glutamate/H(+) symporter 1) (Solute carrier family 25 member 22)	Slc25a22	NA	NA	NA	NA	1.50492e+06	1.63335e+06	850694	1.25111e+06	3.29392e+06	481201	5.04922e+06	2872550
Q9D6R2	Q9D6R2	Isocitrate dehydrogenase [NAD] subunit alpha, mitochondrial (EC 1.1.1.41) (Isocitric dehydrogenase subunit alpha) (NAD(+)-specific ICDH subunit alpha)	Idh3a	294475	641181	337807	504706	617890	5.42052e+06	2.84944e+06	2.76599e+06	720924	576402	2.04087e+06	600834
Q9D6Z1	Q9D6Z1	Nucleolar protein 56 (Nucleolar protein 5A)	Nop56	2.21545e+06	2.48894e+06	765925	1.83547e+06	5.18326e+07	6.18627e+07	3.21923e+07	3.85326e+07	3.71065e+07	6.52682e+06	7.23298e+07	3.01767e+07
Q9D700	Q9D700	Dual specificity protein phosphatase 26 (EC 3.1.3.16) (EC 3.1.3.48) (Dual specificity phosphatase SKRP3)	Dusp26	NA	13302728	11782401	9565536	NA	NA	NA	NA	NA	NA	NA	NA
Q9D706	Q9D706	RNA polymerase II-associated protein 3	Rpap3	NA	NA	NA	NA	2.26492e+06	757490	1.17638e+06	1.88303e+06	NA	NA	NA	NA
Q9D709	Q9D709	Transmembrane protein 79 (Mattrin)	Tmem79	NA	NA	NA	NA	NA	NA	NA	NA	1.9206e+06	5153464	78522736	9307725
Q9D735	Q9D735	Telomerase RNA component interacting RNase (EC 3.1.13.-) (Exoribonuclease Trir)	Trir	NA	NA	NA	NA	2.74582e+06	1.99504e+06	1.53905e+06	2.858e+06	NA	NA	NA	NA
Q9D787	Q9D787	RING-type E3 ubiquitin-protein ligase PPIL2 (EC 2.3.2.27) (CYC4) (Probable inactive peptidyl-prolyl cis-trans isomerase-like 2) (PPIase)	Ppil2	NA	NA	NA	NA	NA	NA	NA	NA	398946	NA	309789	386706
Q9D7G0	Q9D7G0	Ribose-phosphate pyrophosphokinase 1 (EC 2.7.6.1) (Phosphoribosyl pyrophosphate synthase I) (PRS-I)	Prps1	NA	NA	NA	NA	419076	866464	317421	353071	NA	NA	NA	NA
Q9D824-1	Q9D824	Pre-mRNA 3'-end-processing factor FIP1 (FIP1-like 1 protein)	Fip1l1	NA	NA	NA	NA	2.20687e+07	2.81683e+07	1.55596e+07	1.85937e+07	5.84378e+06	160057	6.19684e+06	2.75157e+06
Q9D880	Q9D880	Mitochondrial import inner membrane translocase subunit TIM50	Timm50	NA	NA	NA	NA	1.83172e+07	2.51873e+07	1.13963e+07	1.40764e+07	1.04015e+07	1.87765e+06	30493746	1.34129e+07
Q9D8B3	Q9D8B3	Charged multivesicular body protein 4b (Chromatin-modifying protein 4b) (CHMP4b)	Chmp4b	NA	NA	NA	NA	9630400	9.2979e+06	6.35234e+06	7.26274e+06	4.74226e+06	1.26613e+06	1.88757e+06	3.26063e+06
Q9D8C4	Q9D8C4	Interferon-induced 35 kDa protein homolog (IFP 35) (Ifi-35)	Ifi35	NA	NA	NA	NA	NA	NA	NA	NA	NA	NA	1.16294e+06	NA
Q9D8E6	Q9D8E6	60S ribosomal protein L4	Rpl4	NA	396197	NA	2.14341e+06	8.22198e+07	7.80357e+07	4.0352e+07	5.14275e+07	6.12833e+07	1.15564e+07	5.40062e+07	6.34037e+07
Q9D8N0	Q9D8N0	Elongation factor 1-gamma (EF-1-gamma) (eEF-1B gamma)	Eef1g	5396230	1.43807e+06	979271	1.24462e+06	1.02605e+07	2.25937e+07	1.06512e+07	1.34906e+07	6.49315e+06	688838	1.18069e+07	3.32892e+06
Q9D8S4	Q9D8S4	Oligoribonuclease, mitochondrial (EC 3.1.15.-) (RNA exonuclease 2 homolog) (Small fragment nuclease)	Rexo2	NA	NA	NA	NA	5.27131e+06	NA	3.14198e+06	3.51984e+06	NA	NA	NA	NA
Q9D8T7	Q9D8T7	SRA stem-loop-interacting RNA-binding protein, mitochondrial	Slirp	NA	NA	NA	NA	1971427	2373770	NA	2061307	NA	NA	NA	NA
Q9D8Z1	Q9D8Z1	Activating signal cointegrator 1 complex subunit 1 (ASC-1 complex subunit p50) (Trip4 complex subunit p50)	Ascc1	NA	NA	NA	NA	NA	NA	NA	NA	197321	500308	981582	NA
Q9D903	Q9D903	Probable rRNA-processing protein EBP2	Ebna1bp2	NA	NA	NA	NA	9.24293e+06	2.58142e+07	2.12583e+06	3.0492e+06	NA	NA	NA	NA
Q9D9Z1	Q9D9Z1	Small kinetochore-associated protein (SKAP) (Kinetochore-localized astrin-binding protein) (Kinastrin) (Kinetochore-localized astrin/SPAG5-binding protein) (TRAF4-associated factor 1)	Knstrn	NA	NA	NA	NA	NA	NA	NA	NA	789293	NA	850707	265799
Q9DAW6	Q9DAW6	U4/U6 small nuclear ribonucleoprotein Prp4 (U4/U6 snRNP 60 kDa protein) (WD splicing factor Prp4)	Prpf4	NA	NA	NA	NA	26292872	2.50472e+07	1.27707e+07	1.59996e+07	1.2983e+07	3.10062e+06	1.27024e+07	1.19547e+07
Q9DAW9	Q9DAW9	Calponin-3 (Calponin, acidic isoform)	Cnn3	NA	NA	NA	NA	1.26882e+07	1.73122e+07	1.09807e+07	1.20135e+07	3.06527e+07	1.04224e+07	2.93647e+07	1.45916e+07
Q9DB20	Q9DB20	ATP synthase subunit O, mitochondrial (ATP synthase peripheral stalk subunit OSCP) (Oligomycin sensitivity conferral protein) (OSCP)	Atp5po	NA	4.08416e+06	4723871	3.79871e+06	1.55087e+07	19138191	1.59503e+07	1.83063e+07	1.83827e+06	286159	1.25298e+07	8.29241e+06
Q9DB25	Q9DB25	Dolichyl-phosphate beta-glucosyltransferase (DolP-glucosyltransferase) (EC 2.4.1.117) (Asparagine-linked glycosylation protein 5 homolog)	Alg5	NA	NA	NA	NA	NA	NA	NA	NA	963988	NA	NA	NA
Q9DB43	Q9DB43	Zinc finger protein-like 1	Zfpl1	NA	NA	NA	NA	1.32461e+06	1.6581e+06	1.14168e+06	1.37234e+06	NA	NA	NA	NA
Q9DB77	Q9DB77	Cytochrome b-c1 complex subunit 2, mitochondrial (Complex III subunit 2) (Core protein II) (Ubiquinol-cytochrome-c reductase complex core protein 2)	Uqcrc2	2.14797e+06	1.38133e+06	1.92215e+06	975288	7.97181e+06	8.55801e+06	5.24135e+06	6.63189e+06	1.5231e+07	2.15238e+06	3.42061e+07	1.19284e+07
Q9DB85	Q9DB85	Ribosomal RNA-processing protein 8 (EC 2.1.1.-) (Cerebral protein 1 homolog)	Rrp8	NA	NA	NA	NA	4.23724e+06	3.54293e+06	2.26144e+06	1.55944e+06	NA	NA	NA	NA
Q9DB98	Q9DB98	Leukocyte receptor cluster member 1 homolog	Leng1	NA	NA	NA	NA	NA	NA	NA	NA	556372	NA	NA	78782.9
Q9DBA9	Q9DBA9	General transcription factor IIH subunit 1 (Basic transcription factor 2 62 kDa subunit) (BTF2 p62) (General transcription factor IIH polypeptide 1) (TFIIH basal transcription factor complex p62 subunit)	Gtf2h1	NA	NA	NA	NA	NA	NA	NA	NA	459308	NA	NA	370554
Q9DBC3	Q9DBC3	Cap-specific mRNA (nucleoside-2'-O-)-methyltransferase 1 (EC 2.1.1.57) (Cap methyltransferase 1) (Cap1 2'O-ribose methyltransferase 1) (MTr1) (FtsJ methyltransferase domain-containing protein 2)	Cmtr1	NA	NA	NA	NA	826625	NA	1538294	1504960	NA	NA	NA	NA
Q9DBD5	Q9DBD5	Proline-, glutamic acid- and leucine-rich protein 1 (Modulator of non-genomic activity of estrogen receptor)	Pelp1	NA	NA	NA	NA	3.26897e+06	6.16878e+06	2.16733e+06	2.67366e+06	NA	NA	NA	NA
Q9DBE8	Q9DBE8	Alpha-1,3/1,6-mannosyltransferase ALG2 (EC 2.4.1.132) (EC 2.4.1.257) (Asparagine-linked glycosylation protein 2 homolog) (GDP-Man:Man(1)GlcNAc(2)-PP-Dol alpha-1,3-mannosyltransferase) (GDP-Man:Man(1)GlcNAc(2)-PP-dolichol mannosyltransferase) (GDP-Man:Man(2)GlcNAc(2)-PP-Dol alpha-1,6-mannosyltransferase)	Alg2	NA	NA	NA	NA	NA	NA	NA	NA	NA	NA	NA	578329
Q9DBE9	Q9DBE9	pre-rRNA 2'-O-ribose RNA methyltransferase FTSJ3 (EC 2.1.1.-) (Protein ftsJ homolog 3) (Putative rRNA methyltransferase 3)	Ftsj3	NA	NA	NA	NA	1.43307e+07	2.40016e+07	5.67407e+06	7.44273e+06	1.08464e+06	NA	NA	564542
Q9DBF7-1	Q9DBF7	Pre-mRNA-splicing factor CWC25 homolog (Coiled-coil domain-containing protein 49) (Spliceosome-associated protein homolog CWC25)	Cwc25	NA	NA	NA	NA	117718	1.41568e+06	NA	NA	1.37792e+06	NA	NA	NA
Q9DBG3	Q9DBG3	AP-2 complex subunit beta (AP105B) (Adaptor protein complex AP-2 subunit beta) (Adaptor-related protein complex 2 subunit beta) (Beta-2-adaptin) (Beta-adaptin) (Clathrin assembly protein complex 2 beta large chain) (Plasma membrane adaptor HA2/AP2 adaptin beta subunit)	Ap2b1	NA	NA	NA	NA	1.57145e+06	2553069	909773	977846	5.51445e+06	478202	13436988	3.3818e+06
Q9DBG5	Q9DBG5	Perilipin-3 (Cargo selection protein TIP47) (Mannose-6-phosphate receptor-binding protein 1)	Plin3	NA	NA	NA	NA	11031970	4540744	2.15775e+06	3535268	NA	NA	NA	NA
Q9DBG7	Q9DBG7	Signal recognition particle receptor subunit alpha (SR-alpha) (Docking protein alpha) (DP-alpha)	Srpra	NA	NA	NA	NA	6.10262e+06	7.44589e+06	2.76412e+06	4.73341e+06	NA	NA	1.61341e+06	NA
Q9DBH0	Q9DBH0	NEDD4-like E3 ubiquitin-protein ligase WWP2 (EC 2.3.2.26) (HECT-type E3 ubiquitin transferase WWP2) (WW domain-containing protein 2)	Wwp2	NA	NA	NA	NA	NA	NA	NA	NA	NA	NA	NA	NA
Q9DBJ1	Q9DBJ1	Phosphoglycerate mutase 1 (EC 5.4.2.11) (EC 5.4.2.4) (BPG-dependent PGAM 1) (Phosphoglycerate mutase isozyme B) (PGAM-B)	Pgam1	NA	NA	NA	NA	2679604	5.07673e+06	2.66609e+06	4.92736e+06	NA	NA	9.98345e+06	766270
Q9DBL1	Q9DBL1	Short/branched chain specific acyl-CoA dehydrogenase, mitochondrial (SBCAD) (EC 1.3.8.5) (2-methyl branched chain acyl-CoA dehydrogenase) (2-MEBCAD) (2-methylbutyryl-coenzyme A dehydrogenase) (2-methylbutyryl-CoA dehydrogenase)	Acadsb	NA	NA	NA	NA	NA	NA	NA	NA	2.20142e+06	NA	2.14948e+06	2.61948e+06
Q9DBR0	Q9DBR0	A-kinase anchor protein 8 (AKAP-8) (A-kinase anchor protein 95 kDa) (AKAP 95)	Akap8	NA	NA	NA	NA	2.97908e+06	4.04242e+06	2.10919e+06	1.84575e+06	NA	NA	1.75587e+06	NA
Q9DBR1	Q9DBR1	5'-3' exoribonuclease 2 (EC 3.1.13.-) (Protein Dhm1)	Xrn2	NA	NA	NA	NA	1.97687e+07	22723775	1.29415e+07	1.98717e+07	2.61762e+06	NA	1256287	3.11915e+06
Q9DBR7-1	Q9DBR7	Protein phosphatase 1 regulatory subunit 12A (Myosin phosphatase-targeting subunit 1) (Myosin phosphatase target subunit 1)	Ppp1r12a	NA	NA	NA	NA	7.87913e+06	8.94245e+06	4.98592e+06	7.42258e+06	NA	NA	NA	NA
Q9DBS9	Q9DBS9	Oxysterol-binding protein-related protein 3 (ORP-3) (OSBP-related protein 3)	Osbpl3	NA	NA	NA	NA	1.13383e+06	6808888	NA	NA	NA	NA	NA	NA
Q9DBT5	Q9DBT5	AMP deaminase 2 (EC 3.5.4.6) (AMP deaminase isoform L)	Ampd2	NA	NA	NA	NA	3.76351e+06	4502954	2.37194e+06	1.82515e+06	NA	NA	NA	NA
Q9DBT9	Q9DBT9	Dimethylglycine dehydrogenase, mitochondrial (EC 1.5.8.4) (ME2GLYDH)	Dmgdh	NA	NA	NA	NA	NA	NA	NA	NA	NA	NA	NA	NA
Q9DBY8	Q9DBY8	Nuclear valosin-containing protein-like (NVLp) (Nuclear VCP-like protein)	Nvl	NA	NA	NA	NA	1.6849e+07	1.93328e+07	7.38574e+06	1.05522e+07	NA	NA	NA	NA
Q9DC04-5	Q9DC04	Regulator of G-protein signaling 3 (RGS3) (C2PA)	Rgs3	NA	NA	NA	NA	NA	NA	NA	NA	NA	NA	NA	NA
Q9DC23	Q9DC23	DnaJ homolog subfamily C member 10 (EC 1.8.4.-) (Endoplasmic reticulum DNA J domain-containing protein 5) (ER-resident protein ERdj5) (ERdj5) (Endoplasmic reticulum DnaJ-PDI fusion protein 1) (J domain-containing protein disulfide isomerase-like protein) (J domain-containing PDI-like protein) (JPDI)	Dnajc10	NA	NA	NA	NA	437153	349218	207155	343024	NA	NA	NA	NA
Q9DC51	Q9DC51	Guanine nucleotide-binding protein G(i) subunit alpha-3 (G(i) alpha-3)	Gnai3	NA	NA	NA	NA	955203	858381	657070	626227	1.01747e+06	536691	8.25834e+06	960492
Q9DC70	Q9DC70	NADH dehydrogenase [ubiquinone] iron-sulfur protein 7, mitochondrial (EC 7.1.1.2) (Complex I-20kD) (CI-20kD) (NADH-ubiquinone oxidoreductase 20 kDa subunit)	Ndufs7	NA	NA	NA	NA	391707	227147	142631	230372	NA	NA	NA	NA
Q9DCA2	Q9DCA2	28S ribosomal protein S11, mitochondrial (MRP-S11) (S11mt)	Mrps11	NA	NA	NA	NA	655376	1.08542e+06	377481	578254	1.13021e+06	NA	1.36228e+06	1.04704e+06
Q9DCA5	Q9DCA5	Ribosome biogenesis protein BRX1 homolog (Brix domain-containing protein 2)	Brix1	NA	NA	NA	NA	210389	204011	66476.5	70073.8	NA	NA	1.71112e+06	156697
Q9DCD2	Q9DCD2	Pre-mRNA-splicing factor SYF1 (XPA-binding protein 2)	Xab2	NA	NA	NA	NA	3.05352e+06	2.4797e+06	1.99724e+06	2.18102e+06	NA	NA	NA	NA
Q9DCD5	Q9DCD5	Tight junction-associated protein 1 (Protein incorporated later into tight junctions) (Tight junction protein 4)	Tjap1	NA	NA	NA	NA	6.81742e+06	7.47513e+06	3.60104e+06	5.51506e+06	9.37024e+07	2.46443e+07	3.74048e+07	2.65072e+07
Q9DCE5	Q9DCE5	p21-activated protein kinase-interacting protein 1 (PAK1-interacting protein 1) (Putative PAK inhibitor Skb15)	Pak1ip1	NA	NA	NA	NA	NA	NA	NA	NA	NA	NA	1.07222e+06	NA
Q9DCH4	Q9DCH4	Eukaryotic translation initiation factor 3 subunit F (eIF3f) (Deubiquitinating enzyme eIF3f) (EC 3.4.19.12) (Eukaryotic translation initiation factor 3 subunit 5) (eIF-3-epsilon) (eIF3 p47)	Eif3f	NA	NA	NA	NA	1.15227e+06	1.26317e+06	NA	NA	NA	NA	5.82838e+06	NA
Q9DCL8	Q9DCL8	Protein phosphatase inhibitor 2 (IPP-2)	Ppp1r2	NA	NA	NA	NA	959659	1.29294e+06	9.53877e+06	1.28018e+07	NA	NA	NA	NA
Q9DCL9	Q9DCL9	Bifunctional phosphoribosylaminoimidazole carboxylase/phosphoribosylaminoimidazole succinocarboxamide synthetase (PAICS) [Includes: Phosphoribosylaminoimidazole carboxylase (EC 4.1.1.21) (AIR carboxylase) (AIRC); Phosphoribosylaminoimidazole succinocarboxamide synthetase (EC 6.3.2.6) (SAICAR synthetase)]	Paics	NA	NA	NA	NA	2.11766e+06	5.62685e+06	2.32484e+06	3.65086e+06	NA	NA	NA	NA
Q9DCM0	Q9DCM0	Persulfide dioxygenase ETHE1, mitochondrial (EC 1.13.11.18) (Ethylmalonic encephalopathy protein 1 homolog) (Hepatoma subtracted clone one protein) (Sulfur dioxygenase ETHE1)	Ethe1	NA	3512148	2.80582e+06	3.95017e+06	7179851	9.85134e+06	4.99592e+06	6.37187e+06	5.67307e+06	2.04313e+06	994627	8.23076e+06
Q9DCN2	Q9DCN2	NADH-cytochrome b5 reductase 3 (B5R) (Cytochrome b5 reductase) (EC 1.6.2.2) (Diaphorase-1)	Cyb5r3	10699169	2.51909e+07	1.52023e+07	1.48386e+07	5.12257e+07	3.29519e+07	27086706	3.79626e+07	8.81717e+06	1.196e+06	3.73187e+07	2.21483e+07
Q9DCT8	Q9DCT8	Cysteine-rich protein 2 (CRP-2) (Heart LIM protein)	Crip2	NA	NA	NA	NA	2.61621e+07	4.36703e+07	1.43031e+07	1.45356e+07	2.75649e+07	1.40795e+06	8.14187e+06	1.17427e+07
Q9DCW4	Q9DCW4	Electron transfer flavoprotein subunit beta (Beta-ETF)	Etfb	NA	833972	162642	1.07712e+06	9.705e+06	13070212	7.78224e+06	9.00813e+06	1.98874e+06	1.46814e+06	NA	2.33746e+06
Q9DCX2	Q9DCX2	ATP synthase subunit d, mitochondrial (ATPase subunit d) (ATP synthase peripheral stalk subunit d)	Atp5pd	547502	1.73137e+06	1.72779e+06	1.80613e+06	2.52202e+07	3.09227e+07	1.60305e+07	2.64282e+07	1.72482e+07	8.09883e+06	3.54393e+07	1.98691e+07
Q9EP53	Q9EP53	Hamartin (Tuberous sclerosis 1 protein homolog)	Tsc1	NA	NA	NA	NA	NA	NA	NA	NA	NA	NA	NA	NA
Q9EP71	Q9EP71	Ankycorbin (Ankyrin repeat and coiled-coil structure-containing protein) (Novel retinal pigment epithelial cell protein) (Retinoic acid-induced protein 14) (p125)	Rai14	NA	NA	NA	NA	5.06942e+07	8.116e+07	2.42471e+07	4.06236e+07	2.03301e+06	71692.9	NA	903942
Q9EP97	Q9EP97	Sentrin-specific protease 3 (EC 3.4.22.-) (SUMO-1-specific protease 3) (Sentrin/SUMO-specific protease SENP3) (Smt3-specific isopeptidase 1) (Smt3ip1)	Senp3	NA	NA	NA	NA	300450	NA	119061	137811	2.75379e+06	NA	1.90121e+06	2.99778e+06
Q9EPE9	Q9EPE9	Endoplasmic reticulum transmembrane helix translocase (EC 7.4.2.-) (Endoplasmic reticulum P5A-ATPase)	Atp13a1	115555	91312.4	65040.3	NA	3.90244e+07	6.5872e+07	8.67166e+06	1.91416e+07	NA	NA	NA	NA
Q9EPJ9	Q9EPJ9	ADP-ribosylation factor GTPase-activating protein 1 (ARF GAP 1) (ADP-ribosylation factor 1 GTPase-activating protein) (ARF1 GAP) (ARF1-directed GTPase-activating protein)	Arfgap1	NA	NA	NA	NA	8.35601e+06	8.98795e+06	4.05734e+06	6.23869e+06	4712518	141103	3.3075e+06	1.889e+06
Q9EPK5	Q9EPK5	WW domain-containing transcription regulator protein 1 (Transcriptional coactivator with PDZ-binding motif)	Wwtr1	NA	NA	NA	NA	NA	NA	NA	NA	1.68135e+06	NA	266701	431332
Q9EPL8	Q9EPL8	Importin-7 (Imp7) (Ran-binding protein 7) (RanBP7)	Ipo7	NA	NA	NA	NA	1.19261e+06	NA	1.00525e+06	1.09006e+06	NA	NA	NA	NA
Q9EPQ8	Q9EPQ8	Transcription factor 20 (TCF-20) (Nuclear factor SPBP) (Stromelysin-1 PDGF-responsive element-binding protein) (SPRE-binding protein)	Tcf20	NA	NA	NA	NA	1.56376e+06	2.18026e+06	NA	1487805	NA	NA	NA	NA
Q9EPU0-1	Q9EPU0	Regulator of nonsense transcripts 1 (EC 3.6.4.12) (EC 3.6.4.13) (ATP-dependent helicase RENT1) (Nonsense mRNA reducing factor 1) (NORF1) (Up-frameshift suppressor 1 homolog) (mUpf1)	Upf1	NA	NA	NA	NA	3.41124e+06	3.04741e+06	2.56797e+06	3.27656e+06	3.01051e+07	4.50237e+06	3.49778e+07	1.83187e+07
Q9EQ28	Q9EQ28	DNA polymerase delta subunit 3 (DNA polymerase delta subunit p66)	Pold3	NA	NA	NA	NA	2.08539e+06	1.43708e+06	511578	2.42902e+06	NA	NA	NA	NA
Q9EQ61	Q9EQ61	Pescadillo homolog	Pes1	54303.4	295742	194259	267020	5.35635e+06	3.75369e+06	2.73906e+06	2.92589e+06	NA	685082	980395	999697
Q9EQH3	Q9EQH3	Vacuolar protein sorting-associated protein 35 (Maternal-embryonic 3) (Vesicle protein sorting 35)	Vps35	NA	NA	NA	NA	NA	NA	NA	NA	298728	NA	2.52431e+06	NA
Q9EQM6	Q9EQM6	Microprocessor complex subunit DGCR8 (DiGeorge syndrome critical region 8 homolog) (Gy1)	Dgcr8	NA	NA	NA	NA	2.65909e+06	3.58974e+06	1.64996e+06	3.74116e+06	NA	NA	NA	NA
Q9EQP2	Q9EQP2	EH domain-containing protein 4 (PAST homolog 2) (mPAST2)	Ehd4	NA	NA	NA	NA	2.27711e+06	3.80964e+06	1.72839e+06	1.99049e+06	2.52849e+06	272858	1.34796e+06	1.58939e+06
Q9EQQ9-1	Q9EQQ9	Protein O-GlcNAcase (OGA) (EC 3.2.1.169) (Beta-N-acetylhexosaminidase) (Beta-hexosaminidase) (Bifunctional protein NCOAT) (Meningioma-expressed antigen 5) (N-acetyl-beta-D-glucosaminidase) (N-acetyl-beta-glucosaminidase)	Oga	NA	NA	NA	NA	NA	NA	NA	NA	NA	NA	NA	NA
Q9EQU5	Q9EQU5	Protein SET (Phosphatase 2A inhibitor I2PP2A) (I-2PP2A) (Template-activating factor I) (TAF-I)	Set	NA	NA	NA	NA	2.59916e+06	1.01884e+06	NA	2.00323e+06	NA	NA	NA	NA
Q9ER69	Q9ER69	Pre-mRNA-splicing regulator WTAP (Female-lethal(2)D homolog) (WT1-associated protein) (Wilms tumor 1-associating protein)	Wtap	NA	NA	NA	NA	17412606	2.69192e+07	1.06844e+07	1.40786e+07	NA	NA	NA	NA
Q9ER72	Q9ER72	Cysteine--tRNA ligase, cytoplasmic (EC 6.1.1.16) (Cysteinyl-tRNA synthetase) (CysRS)	Cars1	NA	NA	NA	NA	1.49987e+06	1630959	1.0836e+06	1089153	NA	NA	NA	NA
Q9ER73	Q9ER73	Elongator complex protein 4 (PAX6 neighbor gene protein)	Elp4	NA	NA	NA	NA	NA	NA	NA	NA	237101	NA	NA	NA
Q9ER88-1	Q9ER88	28S ribosomal protein S29, mitochondrial (MRP-S29) (S29mt) (Death-associated protein 3) (DAP-3)	Dap3	NA	NA	NA	NA	799208	1.34355e+06	NA	NA	NA	NA	NA	NA
Q9ERA6	Q9ERA6	Tuftelin-interacting protein 11 (Septin and tuftelin-interacting protein 1) (STIP-1) (Tuftelin-interacting protein 39)	Tfip11	NA	NA	NA	NA	2.41476e+06	5.515e+06	1277384	2574666	1.38202e+07	5.51738e+06	6.93181e+06	7.1271e+06
Q9ERB0	Q9ERB0	Synaptosomal-associated protein 29 (SNAP-29) (Golgi SNARE of 32 kDa) (Gs32) (Soluble 29 kDa NSF attachment protein) (Vesicle-membrane fusion protein SNAP-29)	Snap29	NA	NA	NA	NA	555962	4.33287e+06	2.14018e+06	2.82517e+06	NA	NA	NA	NA
Q9ERD7	Q9ERD7	Tubulin beta-3 chain	Tubb3	NA	NA	NA	NA	NA	NA	NA	NA	NA	NA	NA	NA
Q9ERG0	Q9ERG0	LIM domain and actin-binding protein 1 (Epithelial protein lost in neoplasm) (mEPLIN)	Lima1	NA	202815	27456.9	292079	7.23148e+07	1.00745e+08	4.69603e+07	5.92633e+07	1.39253e+07	3.33896e+06	1.3171e+07	1.35755e+07
Q9ERG2	Q9ERG2	Striatin-3 (Cell cycle autoantigen SG2NA) (S/G2 antigen)	Strn3	NA	NA	NA	NA	6.07049e+07	8.54151e+07	3.41764e+07	4.29447e+07	NA	326198	1.6925e+06	1.1478e+06
Q9ERU9	Q9ERU9	E3 SUMO-protein ligase RanBP2 (EC 2.3.2.-) (Ran-binding protein 2) (RanBP2)	Ranbp2	NA	NA	NA	NA	1.07966e+09	1.40573e+09	7.77677e+08	9.37422e+08	1.79255e+08	7.32743e+07	3.08629e+08	1.71479e+08
Q9ES28-1	Q9ES28	Rho guanine nucleotide exchange factor 7 (Beta-Pix) (PAK-interacting exchange factor beta) (p85SPR)	Arhgef7	NA	NA	NA	NA	9.26294e+06	1.04817e+07	4.57525e+06	3.74109e+06	NA	NA	NA	NA
Q9ES28-3	Q9ES28	Rho guanine nucleotide exchange factor 7 (Beta-Pix) (PAK-interacting exchange factor beta) (p85SPR)	Arhgef7	NA	NA	NA	NA	NA	NA	NA	NA	2.78547e+08	1.61316e+08	3.69573e+08	2.29314e+08
Q9ES28-8	Q9ES28	Rho guanine nucleotide exchange factor 7 (Beta-Pix) (PAK-interacting exchange factor beta) (p85SPR)	Arhgef7	NA	NA	NA	NA	NA	NA	NA	NA	7.36786e+07	1.40257e+06	3.73782e+07	5.94274e+07
Q9ES52-1	Q9ES52	Phosphatidylinositol 3,4,5-trisphosphate 5-phosphatase 1 (EC 3.1.3.86) (Inositol polyphosphate-5-phosphatase D) (EC 3.1.3.56) (Inositol polyphosphate-5-phosphatase of 145 kDa) (SIP-145) (Phosphatidylinositol-4,5-bisphosphate 5-phosphatase) (EC 3.1.3.36) (SH2 domain-containing inositol 5'-phosphatase 1) (SH2 domain-containing inositol phosphatase 1) (SHIP-1) (p150Ship)	Inpp5d	NA	NA	NA	NA	1.02898e+07	1.38151e+07	7.65377e+06	9.79244e+06	1.59581e+06	1.09389e+06	1427818	1196651
Q9ES97-1	Q9ES97	Reticulon-3	Rtn3	NA	NA	NA	NA	NA	NA	NA	375462	1.73992e+06	NA	9.26882e+06	114088
Q9ESD7-1	Q9ESD7	Dysferlin (Dystrophy-associated fer-1-like protein) (Fer-1-like protein 1)	Dysf	NA	1.00802e+06	NA	NA	NA	NA	NA	NA	954045	1.08645e+06	9.15911e+06	2.91817e+06
Q9ESD7-2	Q9ESD7	Dysferlin (Dystrophy-associated fer-1-like protein) (Fer-1-like protein 1)	Dysf	NA	NA	NA	NA	2.80795e+07	2.92861e+07	1.73372e+07	2.36375e+07	NA	NA	NA	NA
Q9ESJ4	Q9ESJ4	NCK-interacting protein with SH3 domain (54 kDa VacA-interacting protein) (VIP54) (90 kDa N-WASP-interacting protein) (90 kDa SH3 protein interacting with Nck) (SH3 adapter protein SPIN90) (WASP-interacting SH3-domain protein) (WISH) (Wiskott-Aldrich syndrome protein-binding protein) (N-WASP-binding protein)	Nckipsd	NA	NA	NA	NA	NA	NA	NA	NA	NA	399088	NA	615265
Q9ESU6	Q9ESU6	Bromodomain-containing protein 4 (Mitotic chromosome-associated protein) (MCAP)	Brd4	NA	NA	NA	NA	1.24635e+06	1.48524e+06	678678	849986	NA	NA	NA	NA
Q9ESV0	Q9ESV0	ATP-dependent RNA helicase DDX24 (EC 3.6.4.13) (DEAD box protein 24)	Ddx24	135235	156466	109979	100864	2.47647e+06	3.0398e+06	1.37633e+06	596609	912390	NA	NA	562770
Q9ESX5	Q9ESX5	H/ACA ribonucleoprotein complex subunit DKC1 (EC 5.4.99.-) (Dyskerin) (Nopp140-associated protein of 57 kDa) (Nucleolar protein NAP57) (Nucleolar protein family A member 4) (snoRNP protein DKC1)	Dkc1	NA	NA	NA	NA	2.79815e+07	4.46845e+07	2.11866e+07	2.21778e+07	NA	NA	NA	NA
Q9ESZ8-1	Q9ESZ8	General transcription factor II-I (GTFII-I) (TFII-I) (Bruton tyrosine kinase-associated protein 135) (BAP-135) (BTK-associated protein 135)	Gtf2i	NA	NA	NA	NA	1.92231e+06	2.00383e+06	1.54922e+06	1.5005e+06	NA	NA	NA	NA
Q9ET54-4	Q9ET54	Palladin	Palld	NA	NA	NA	NA	1.85827e+08	4.31161e+08	1.13022e+08	1.57411e+08	NA	NA	NA	NA
Q9ET54-6	Q9ET54	Palladin	Palld	NA	NA	NA	NA	NA	NA	NA	NA	1.4099e+08	3.48405e+07	5.68336e+07	52721317
Q9JHJ0	Q9JHJ0	Tropomodulin-3 (Ubiquitous tropomodulin) (U-Tmod)	Tmod3	NA	NA	NA	NA	3.35773e+06	4.29143e+06	2.36905e+06	2.78159e+06	NA	NA	NA	NA
Q9JHL0-1	Q9JHL0	Linker for activation of T-cells family member 2 (Linker for activation of B-cells) (Membrane-associated adapter molecule) (Non-T-cell activation linker) (Williams-Beuren syndrome chromosomal region 15 protein homolog)	Lat2	NA	NA	NA	NA	NA	NA	NA	NA	NA	NA	NA	NA
Q9JHL1	Q9JHL1	Na(+)/H(+) exchange regulatory cofactor NHE-RF2 (NHERF-2) (NHE3 kinase A regulatory protein E3KARP) (Octs2) (SRY-interacting protein 1) (SIP-1) (Sodium-hydrogen exchanger regulatory factor 2) (Solute carrier family 9 isoform A3 regulatory factor 2) (Tyrosine kinase activator protein 1) (TKA-1)	Nherf2	NA	710233	126905	1511590	1.23733e+07	1.46447e+07	5.69403e+06	1.162e+07	1.13544e+07	5.82692e+06	1.58956e+07	9.81685e+06
Q9JHQ5	Q9JHQ5	Leucine zipper transcription factor-like protein 1	Lztfl1	NA	NA	NA	NA	225990	419678	248725	324239	NA	NA	NA	NA
Q9JHS4	Q9JHS4	ATP-dependent Clp protease ATP-binding subunit clpX-like, mitochondrial	Clpx	NA	NA	NA	NA	NA	NA	NA	NA	396047	224277	453017	485624
Q9JHS9	Q9JHS9	Spliceosome-associated protein CWC15 homolog (Embryonic development factor 1) (mED1)	Cwc15	NA	NA	NA	NA	NA	NA	NA	NA	955597	NA	NA	NA
Q9JHU4	Q9JHU4	Cytoplasmic dynein 1 heavy chain 1 (Cytoplasmic dynein heavy chain 1) (Dynein heavy chain, cytosolic)	Dync1h1	NA	NA	NA	NA	NA	NA	NA	NA	NA	NA	NA	NA
Q9JHW4	Q9JHW4	Selenocysteine-specific elongation factor (Elongation factor sec) (Eukaryotic elongation factor, selenocysteine-tRNA-specific) (mSelB)	Eefsec	NA	NA	NA	NA	470588	770064	470132	329096	NA	NA	NA	NA
Q9JI10	Q9JI10	Serine/threonine-protein kinase 3 (EC 2.7.11.1) (Mammalian STE20-like protein kinase 2) (MST-2) (STE20-like kinase MST2) [Cleaved into: Serine/threonine-protein kinase 3 36kDa subunit (MST2/N); Serine/threonine-protein kinase 3 20kDa subunit (MST2/C)]	Stk3	NA	NA	NA	NA	933310	NA	827367	1.1626e+06	2.34423e+06	NA	1.67661e+06	1.85959e+06
Q9JI13-1	Q9JI13	Something about silencing protein 10 (Charged amino acid-rich leucine zipper 1) (Crl-1) (Disrupter of silencing SAS10) (UTP3 homolog)	Utp3	NA	NA	NA	NA	8.66581e+06	1.3397e+07	3.47586e+06	5.5777e+06	NA	NA	NA	NA
Q9JI91	Q9JI91	Alpha-actinin-2 (Alpha-actinin skeletal muscle isoform 2) (F-actin cross-linking protein)	Actn2	NA	NA	NA	NA	NA	NA	NA	NA	NA	NA	894266	NA
Q9JIH2	Q9JIH2	Nuclear pore complex protein Nup50 (50 kDa nucleoporin) (Nuclear pore-associated protein 60 kDa-like) (Nucleoporin Nup50)	Nup50	NA	NA	NA	NA	2.98042e+08	4.02573e+08	1.54922e+08	2.27642e+08	6.57994e+06	788209	9.24907e+06	5.30104e+06
Q9JII5	Q9JII5	DAZ-associated protein 1 (Deleted in azoospermia-associated protein 1)	Dazap1	NA	NA	NA	NA	2.95544e+06	1.98925e+06	1.72677e+06	2.09017e+06	1.76059e+06	NA	NA	1.26871e+06
Q9JIK5	Q9JIK5	Nucleolar RNA helicase 2 (EC 3.6.4.13) (DEAD box protein 21) (Gu-alpha) (Nucleolar RNA helicase Gu) (Nucleolar RNA helicase II) (RH II/Gu)	Ddx21	9.2589e+06	1.06955e+07	7.00574e+06	7.75394e+06	2.03472e+08	2.96233e+08	1.18741e+08	1.61877e+08	6.833e+07	3.38287e+07	6.28847e+07	5.15143e+07
Q9JIS8	Q9JIS8	Solute carrier family 12 member 4 (Electroneutral potassium-chloride cotransporter 1) (Erythroid K-Cl cotransporter 1) (mKCC1)	Slc12a4	NA	NA	NA	NA	1.12722e+06	1.79764e+06	769759	1.04966e+06	NA	NA	NA	333267
Q9JIW9	Q9JIW9	Ras-related protein Ral-B (EC 3.6.5.2)	Ralb	NA	NA	NA	NA	1.02879e+07	1.2917e+07	4.80855e+06	8.61892e+06	NA	NA	NA	NA
Q9JIX8	Q9JIX8	Apoptotic chromatin condensation inducer in the nucleus (Acinus)	Acin1	NA	NA	NA	NA	1.46295e+07	6.77168e+07	8.33873e+06	1.28257e+07	NA	NA	NA	NA
Q9JIY2	Q9JIY2	E3 ubiquitin-protein ligase Hakai (EC 2.3.2.27) (Casitas B-lineage lymphoma-transforming sequence-like protein 1) (c-Cbl-like protein 1) (E-cadherin binding protein E7) (RING-type E3 ubiquitin transferase Hakai)	Cbll1	NA	NA	NA	NA	586844	223621	270730	365522	NA	NA	NA	NA
Q9JIZ9	Q9JIZ9	Phospholipid scramblase 3 (PL scramblase 3) (Ca(2+)-dependent phospholipid scramblase 3)	Plscr3	NA	NA	NA	NA	8.02977e+06	8.10525e+06	3.54591e+06	4.0751e+06	10252999	2377156	4.97728e+06	6214665
Q9JJ11	Q9JJ11	Transforming acidic coiled-coil-containing protein 3 (ARNT-interacting protein)	Tacc3	NA	NA	NA	NA	NA	NA	NA	NA	NA	NA	NA	NA
Q9JJ28	Q9JJ28	Protein flightless-1 homolog	Flii	NA	NA	NA	NA	1.38735e+06	NA	1.45246e+06	830165	NA	243280	485840	470891
Q9JJ80	Q9JJ80	Ribosome production factor 2 homolog (Brix domain-containing protein 1) (Ribosome biogenesis protein RPF2 homolog)	Rpf2	NA	NA	NA	NA	4.33977e+06	7961944	4.45081e+06	4.74351e+06	2.87702e+06	516537	5.61276e+06	2.67685e+06
Q9JJ89	Q9JJ89	Coiled-coil domain-containing protein 86 (Cytokine-induced protein with coiled-coil domain) (mCyclon)	Ccdc86	NA	NA	NA	NA	4.73005e+06	4.3922e+06	2.27961e+06	2.46728e+06	NA	NA	NA	NA
Q9JJA9	Q9JJA9	General receptor for phosphoinositides 1-associated scaffold protein (GRP1-associated scaffold protein)	Tamalin	NA	NA	NA	NA	NA	NA	NA	NA	1.45549e+08	5.09384e+07	1.27368e+08	1.01151e+08
Q9JJG0-1	Q9JJG0	Transforming acidic coiled-coil-containing protein 2	Tacc2	NA	NA	NA	NA	2.72244e+06	3102516	NA	NA	NA	NA	NA	NA
Q9JJG0-3	Q9JJG0	Transforming acidic coiled-coil-containing protein 2	Tacc2	NA	NA	NA	NA	NA	NA	NA	NA	9.47819e+06	1.78554e+06	8116291	5.37628e+06
Q9JJI8	Q9JJI8	60S ribosomal protein L38	Rpl38	NA	NA	NA	NA	NA	686319	NA	2.38016e+06	1.00412e+06	202300	6.27416e+06	2.19214e+06
Q9JJU8	Q9JJU8	Adapter Sh3bgrl (SH3 domain-binding glutamic acid-rich-like protein 1)	Sh3bgrl	NA	NA	NA	NA	386538	597674	375050	391497	NA	NA	NA	NA
Q9JK48	Q9JK48	Endophilin-B1 (SH3 domain-containing GRB2-like protein B1)	Sh3glb1	NA	NA	NA	NA	NA	NA	NA	NA	5.67074e+06	557656	2.51063e+06	2.55294e+06
Q9JKF1	Q9JKF1	Ras GTPase-activating-like protein IQGAP1	Iqgap1	NA	NA	NA	NA	4.57945e+06	7.4981e+06	1.91887e+06	3.51792e+06	4.5207e+06	3.11464e+06	4.48886e+06	2.26567e+06
Q9JKP5	Q9JKP5	Muscleblind-like protein 1 (Triplet-expansion RNA-binding protein)	Mbnl1	NA	779947	953215	1016178	5286744	5406374	3638151	4.2513e+06	4585129	600761	NA	2671509
Q9JKX4-1	Q9JKX4	Protein AATF (Apoptosis-antagonizing transcription factor) (Rb-binding protein Che-1) (Traube protein)	Aatf	NA	NA	NA	NA	4.73316e+06	5553140	1.31928e+06	3.7101e+06	NA	NA	NA	NA
Q9JL70	Q9JL70	Fanconi anemia group A protein homolog (Protein FACA)	Fanca	NA	NA	NA	NA	NA	NA	NA	NA	1.10259e+06	535176	NA	860060
Q9JLC6	Q9JLC6	Thyrotroph embryonic factor	Tef	NA	NA	NA	NA	238953	323722	200070	236373	NA	NA	NA	NA
Q9JLI8-1	Q9JLI8	Squamous cell carcinoma antigen recognized by T-cells 3 (SART-3) (mSART-3) (Tumor-rejection antigen SART3)	Sart3	NA	NA	NA	NA	2.74298e+06	3.26489e+06	2.44208e+06	3555835	NA	NA	NA	NA
Q9JLJ0	Q9JLJ0	Lipopolysaccharide-induced tumor necrosis factor-alpha factor homolog (LPS-induced TNF-alpha factor homolog) (Estrogen-enhanced transcript protein) (mEET) (LITAF-like protein) (NEDD4 WW domain-binding protein 3)	Litaf	NA	NA	NA	NA	NA	NA	NA	NA	518776	633077	2938588	954468
Q9JLQ0	Q9JLQ0	CD2-associated protein (Mesenchyme-to-epithelium transition protein with SH3 domains 1) (METS-1)	Cd2ap	NA	NA	NA	NA	2.16597e+07	3.13411e+07	1.03506e+07	1.2938e+07	1.34063e+08	1.74675e+07	103235637	6.61881e+07
Q9JLQ2	Q9JLQ2	ARF GTPase-activating protein GIT2 (ARF GAP GIT2) (Cool-interacting tyrosine-phosphorylated protein 2) (CAT-2) (CAT2) (G protein-coupled receptor kinase-interactor 2) (GRK-interacting protein 2)	Git2	NA	NA	NA	NA	2.54277e+06	3.06728e+06	2.60795e+06	3.0845e+06	9.19012e+07	5.73143e+07	9.96544e+07	9.69215e+07
Q9JLV1	Q9JLV1	BAG family molecular chaperone regulator 3 (BAG-3) (Bcl-2-associated athanogene 3) (Bcl-2-binding protein Bis)	Bag3	NA	NA	NA	NA	NA	NA	NA	NA	1.60739e+06	309166	604776	1.071e+06
Q9JM52	Q9JM52	Misshapen-like kinase 1 (EC 2.7.11.1) (GCK family kinase MiNK) (MAPK/ERK kinase kinase kinase 6) (MEK kinase kinase 6) (MEKKK 6) (Misshapen/NIK-related kinase) (Mitogen-activated protein kinase kinase kinase kinase 6)	Mink1	NA	NA	NA	NA	NA	NA	NA	NA	NA	NA	NA	NA
Q9JM61	Q9JM61	Thrombospondin type-1 domain-containing protein 1 (Transmembrane molecule with thrombospondin module)	Thsd1	NA	NA	NA	NA	1.63997e+06	1.80931e+06	766234	1231102	NA	NA	NA	NA
Q9JMA1	Q9JMA1	Ubiquitin carboxyl-terminal hydrolase 14 (EC 3.4.19.12) (Deubiquitinating enzyme 14) (Ubiquitin thioesterase 14) (Ubiquitin-specific-processing protease 14)	Usp14	NA	NA	NA	NA	NA	NA	NA	NA	749278	224033	309785	423085
[truncated: 142 more rows]

## Sheet: Shank3dE18-BioID2
1) These proteins were detected in the C1, C2 and E groups. They were differentially expressed in the E vs C1 and E vs C2 comparison
		E vs C1						E vs C2
Accession	Gene	C1.Mean (Normalized)	E.Mean (Normalized)	E.C1. log2(Fold Change)	E.C1. Linear.(Fold Change)	E.C1.p_value	FDR	C2.Mean (Normalized)	E.Mean (Normalized)	E.C2. log2(Fold Change)	E.C2. Linear.(Fold Change)	E.C2.p_value	FDR
P10107	Anxa1	21.4129	27.0186	5.60574	48.6961	0.000544846	0.00256856	23.174	28.3012	5.12719	34.9492	0.000192962	0.00130249
Q8VDN2	Atp1a1	19.487	23.0196	3.53268	11.5729	0.00031185	0.00257276	24.2815	24.7495	0.467991	1.38318	0.00304953	0.00735154
Q61656	Ddx5	24.515	27.0473	2.53237	5.7852	0.000400401	0.00264264	26.3879	28.0588	1.67095	3.18423	0.00547153	0.0108626
O88569	Hnrnpa2b1	23.0581	28.2004	5.14234	35.3181	0.000167513	0.00276396	28.3098	29.1251	0.815341	1.75971	0.0471768	0.0486174
Q8VDW0-1	Ddx39a	23.6942	25.3642	1.66995	3.18203	0.000854325	0.00313252	25.5235	26.6335	1.10993	2.15836	0.00462993	0.00976626
Q4ACU6	Shank3	22.1274	37.2478	15.1203	35617.7	0.000155112	0.0051187	27.1928	37.6528	10.46	1408.54	5.99827e-07	4.04883e-05
Q6AW69-1	Cgnl1	20.4614	26.2938	5.83242	56.9815	0.00527102	0.0124246	24.9333	27.6752	2.74187	6.68938	3.08489e-05	0.00034705
Q9Z110-1	Aldh18a1	17.2988	22.8074	5.50859	45.525	0.00611381	0.0126097	23.6053	24.5461	0.940796	1.91959	0.0153024	0.0202531
Q501J6	Ddx17	19.0371	22.7361	3.69905	12.9874	0.0114492	0.0171737	23.7094	24.517	0.807551	1.75024	0.00166671	0.00459197
P35979	Rpl12	21.822	23.9273	2.10525	4.30272	0.0155061	0.0204681	23.3153	25.4668	2.1515	4.44289	0.00579867	0.0111832
P68040	Gnb2-rs1	24.2977	25.2232	0.925553	1.89941	0.0320225	0.0352247	24.8579	26.4722	1.61434	3.06173	0.00465762	0.00967351
2) This protein was significantly differentially expressed in the E vs C1 comparison. It was not detected in the C2 group.
		E vs C1
Accession	Gene	C1.Mean (Normalized)	E.Mean (Normalized)	E.C1. log2(Fold Change)	E.C1. Linear.(Fold Change)	E.C1.p_value	FDR
Q8K301	Ddx52	16.7714	19.7266	2.95519	7.75536	0.0107821	0.0169433
3) These proteins are significantly differentially expressed in the E vs C2 comparison. They were not detected in the C1 group.
		E vs C2
Accession	Gene	C2.Mean (Normalized)	E.Mean (Normalized)	E.C2. log2(Fold Change)	E.C2. Linear.(Fold Change)	E.C2.p_value	FDR
Q8BT07-1	Cep55	18.8192	23.7861	4.96684	31.2728	6.19781e-07	2.78901e-05
Q91VH2	Snx9	23.9255	27.9209	3.99543	15.9494	3.96983e-07	5.35928e-05
Q04736	Yes1	18.626	22.9389	4.31295	19.8759	2.31004e-06	7.7964e-05
Q8BKX1	Baiap2	20.8537	27.9751	7.12144	139.241	5.82625e-06	0.000131091
Q9Z0R6-1	Itsn2	21.9446	27.1773	5.23277	37.603	7.84185e-06	0.000132331
A2AB59-1	Arhgap27	19.9671	26.0773	6.11021	69.0805	4.92503e-06	0.000132976
Q9EPU0-1	Upf1	20.9988	24.4333	3.4345	10.8115	7.16867e-06	0.000138253
Q9QWY8	Asap1	20.2965	24.8117	4.51528	22.8683	2.33973e-05	0.000287149
Q9D4H4	Amotl1	20.7834	25.1363	4.35285	20.4332	2.21164e-05	0.000298572
Q8C2Q3	Rbm14	23.0245	25.2028	2.1783	4.52621	4.89525e-05	0.000508353
Q99LI5	Znf281	19.9896	23.8075	3.81796	14.1033	5.3582e-05	0.000516684
Q8C2E7	Washc5	21.0434	24.715	3.67158	12.7426	6.57457e-05	0.000591711
P61028	Rab8b	19.4172	23.7103	4.29304	19.6035	8.26267e-05	0.000656153
Q9JLQ2	Git2	21.0195	26.7186	5.69902	51.949	8.90717e-05	0.000668038
P17710-1	Hk1	22.4795	24.2405	1.761	3.38934	7.95588e-05	0.000671277
Q60902-1	Eps15l1	23.1486	25.8956	2.74698	6.7131	0.00012184	0.000865703
O70194	Eif3d	23.139	27.1152	3.9762	15.7382	0.00025074	0.00130192
Q8R4U7	Luzp1	23.1676	23.748	0.580402	1.49527	0.00024113	0.0013021
P63085	Mapk1	19.4589	22.5284	3.06952	8.39492	0.000237027	0.00133327
Q9JLQ0	Cd2ap	23.7802	26.2284	2.4482	5.45735	0.000234454	0.00137615
Q62036	Cep131	21.9426	25.8959	3.9533	15.4904	0.000216996	0.00139497
Q62418-2	Dbnl	22.8704	27.5181	4.64765	25.0657	0.000231481	0.00142045
Q6P6L0	Filip1l	20.7176	23.9981	3.28053	9.71712	0.000320941	0.00154739
Q9D5R2	Wdr20	18.4115	23.549	5.1375	35.1999	0.000347263	0.00156268
Q8BH43	Wasf2	19.3057	23.0075	3.7018	13.0122	0.000395185	0.00172097
Q80TE4-1	Sipa1l2	19.3323	23.8646	4.53233	23.1403	0.00042319	0.00178533
Q8CGP2	Hist1h2bp	20.021	28.8805	8.85945	464.472	0.000489857	0.00194502
P46062	Sipa1	24.6634	28.3053	3.64189	12.483	0.000518635	0.00200045
Q8CGF1	Arhgap29	19.2969	22.4844	3.18744	9.10995	0.000754414	0.00268016
Q02248	Ctnnb1	20.6475	23.3831	2.73567	6.6607	0.000739355	0.00269765
Q9D6M3	Slc25a22	19.8683	21.3335	1.46518	2.76099	0.000930822	0.00322208
P63037	Dnaja1	20.2698	22.7278	2.45799	5.49452	0.00101369	0.00333777
Q6NXI6	Rprd2	22.7851	24.4413	1.65616	3.15178	0.000989027	0.00333797
Q60598	Cttn	29.4992	31.7009	2.20169	4.60018	0.00110447	0.00355009
Q6ZQ08-1	Cnot1	22.4902	24.6428	2.15258	4.44623	0.00113437	0.0035614
Q8BFW7-1	Lpp	24.1891	27.3277	3.13862	8.8068	0.00126406	0.00387836
Q8CBW3-1	Abi1	20.5936	24.6689	4.07532	16.8575	0.00140532	0.0041243
Q68FF6	Git1	23.8042	28.1053	4.30108	19.7131	0.00152476	0.00428839
G3X9J0	Sipa1l3	24.8516	26.3808	1.52921	2.88628	0.00151707	0.00435754
P45952	Acadm	21.1105	22.3236	1.21312	2.31838	0.00202406	0.00515563
Q62167	Ddx3x	27.752	29.1543	1.40232	2.64326	0.00201947	0.00524285
Q08509	Eps8	19.6382	24.1242	4.48592	22.4077	0.00194706	0.00525707
P26041	Msn	21.8212	23.5295	1.70836	3.26789	0.0020019	0.00529914
Q7TT50	Cdc42bpb	23.1616	23.6518	0.490257	1.4047	0.00258022	0.00645054
P62192	Psmc1	20.2995	24.0479	3.74848	13.4401	0.00267404	0.00656355
Q9CZW5	Tomm70	20.4584	22.6574	2.19902	4.59167	0.00313447	0.00742374
P63087	Ppp1cc	24.4376	27.1777	2.74008	6.68105	0.0033678	0.00783884
P49710	Hcls1	25.2741	28.0778	2.80375	6.98252	0.00361454	0.00827055
Q8BH04	Pck2	20.3702	22.1301	1.75999	3.38696	0.00367877	0.00827723
Q68FG3	Spty2d1	19.9252	22.1398	2.21458	4.64147	0.00401999	0.0088967
P30999-1	Ctnnd1	25.0748	26.0969	1.0221	2.03087	0.0040964	0.00891959
Q9DCD5	Tjap1	22.0109	25.6065	3.59564	12.0892	0.00516766	0.0104124
Q7TPM1-1	Prrc2b	20.2161	22.7557	2.53964	5.81442	0.00547615	0.0107142
Q922F4	Tubb6	19.3705	21.3861	2.01562	4.04355	0.0058508	0.0111248
P26231	Ctnna1	20.0952	22.5506	2.45549	5.485	0.00702043	0.0128075
Q68FD5	Cltc	22.2914	23.467	1.17553	2.25876	0.00696388	0.0128784
Q9Z0U1	Tjp2	26.9951	27.8039	0.808801	1.75175	0.00732176	0.0131792
P17225	Ptbp1	22.126	24.6944	2.5684	5.93153	0.00784334	0.0132356
[truncated: 309 more rows]

## Sheet: GO_Cellular Component
GO Term	Description	P-value	FDR q-value	Enrichment	N	B	n	b	Genes
[truncated: 10 more rows]
[truncated: 97 more columns]

[truncated: 1 more sheets: Edges]
