# Supplementary material for: Endothelial SHANK3 Controls Tight Junction of Neonatal Blood-Brain Barrier
Source: Research Square preprint supplement (doi:10.21203/rs.3.rs-3938233/v1), 2024-03-19
Supplement: Supplementary file 3 [file c181262be1918b8a8496c157.docx]

**Supplementary Information Table 1.**

**Statistical methods and results**

| **Figure** | **Statistical test** | **n value** | **P value** | **F/t values** |
| --- | --- | --- | --- | --- |
| 1g | Two-tailed unpaired *t*-test | *Tek-Cre* n = 17  *eShank3-KO* n = 12 | *p* = 0.0015 | *t*(27) = 3.543 |
| 1h | Two-tailed unpaired *t*-test | *Tek-Cre* n = 16  *eShank3-KO* n = 14 | *p* = 0.5003 | *t*(28) = 0.6828 |
| 1l | Two-way ANOVA with repeated measures followed by Two-stage linear step-up procedure of Benjamini, Kreiger and Yekutieli (false discovery rate) | *Tek-Cre* n = 14 from 3 mice  *eShank3-KO* n = 14 from 3 mice | 100 pA *p* = 0.0305  200 pA *p* = 0.0138  300 pA *p* = 0.0138  400 pA *p* = 0.0138 | There are effects of group (F(1, 26) = 8.642, *p* = 0.0068), current (F(1.390, 36.14) = 469.1, *p* < 0.0001), and group x current interaction (F(3, 78) = 2.327, *p* = 0.0811). |
| 1m | Two-tailed unpaired *t*-test | *Tek-Cre* n = 14 from 3 mice  *eShank3-KO* n = 14 from 3 mice | *p* = 0.9558 | *t*(26) = 0.05600 |
| 1o | Two-way ANOVA with repeated measures followed by Two-stage linear step-up procedure of Benjamini, Kreiger and Yekutieli (false discovery rate) | *Tek-Cre* n = 8 from 3 mice  *eShank3-KO* n = 10 from 3 mice | 100 pA *p* = 0.7383  200 pA *p* = 0.7614  300 pA *p* = 0.7383  400 pA *p* = 0.7383 | There are effects of group (F(1, 16) = 0.5880, *p* = 0.4544), current (F(1.390, 22.24) = 108.4, *p* < 0.0001), and group x current interaction (F(3, 48) = 0.2342, *p* = 0.8721). |
| 1p | Two-tailed unpaired *t*-test | *Tek-Cre* n = 8 from 3 mice  *eShank3-KO* n = 10 from 3 mice | *p* = 0.5538 | *t*(16) = 0.6047 |
| 1r | Two-tailed unpaired *t*-test | *Tek-Cre* n = 13  *eShank3-KO* n = 10 | *p* = 0.0066 | *t*(21) = 3.012 |
| 1s | Two-tailed unpaired *t*-test | *Tek-Cre* n = 13  *eShank3-KO* n = 10 | *p* = 0.0104 | *t*(21) = 2.815 |
| 1t | Two-tailed unpaired *t*-test | *Tek-Cre* n = 13  *eShank3-KO* n = 7 | *p* = 0.6608 | *t*(18) = 0.4462 |
| 1u | Two-tailed unpaired *t*-test | *Tek-Cre* n = 13  *eShank3-KO* n = 7 | *p* = 0.9138 | *t*(18) = 0.1098 |
| 2b | Two-tailed unpaired *t*-test | *Tek-Cre* n = 5  *eShank3-KO* n = 5 | *p* = 0.4385 | *t*(8) = 0.8152 |
| 2c | Two-tailed unpaired *t*-test | *Tek-Cre* n = 5  *eShank3-KO* n = 5 | *p* = 0.9018 | *t*(8) = 0.1273 |
| 2e | Two-way ANOVA with repeated measures followed by Two-stage linear step-up procedure of Benjamini, Krieger and Yekutieli (false discovery rate) | *Tek-Cre* n = 24 from 5 mice  *eShank3-KO* n = 25 from 5 mice | 100 pA *p* = 0.1734  200 pA *p* = 0.0352  300 pA *p* = 0.0149  400 pA *p* = 0.0086 | There are effects of group (F(1, 47) = 6.834, *p* = 0.0120), current (F(2.018, 94.85) = 347.4, *p* < 0.0001), and group x current interaction (F(3, 141) = 4.137, *p* = 0.0076). |
| 2f | Two-tailed unpaired *t*-test | *Tek-Cre* n = 24 from 5 mice  *eShank3-KO* n = 25 from 5 mice | *p* = 0.4243 | *t*(47) = 0.8061 |
| 2g | Two-way ANOVA with repeated measures followed by Two-stage linear step-up procedure of Benjamini, Krieger and Yekutieli (false discovery rate) | *Tek-Cre* n = 16 from 4 mice  *eShank3-KO* n = 18  from 5 mice | 100 pA *p* = 0.7731  200 pA *p* > 0.9999  300 pA *p* = 0.7998  400 pA *p* = 0.7998 | There are effects of group (F(1, 32) = 0.01864, *p* = 0.8923), current (F(1.679, 53.74) = 246.1, *p* < 0.0001), and group x current interaction (F(3, 96) = 2.439, *p* = 0.0692). |
| 2h | Two-tailed unpaired *t*-test | *Tek-Cre* n = 16 from 4 mice  *eShank3-KO* n = 18 from 5 mice | *p* = 0.5946 | *t*(32) = 0.5376 |
| 2j | Two-way ANOVA followed by Šídák’s multiple comparisons test | *Tek-Cre* n = 15  *eShank3-KO* n = 10 | Empty vs Stimulus  *Tek-Cre* *p =* 0.0135  *eShank3-KO p* = 0.6123  *Tek-Cre* vs *eShank3-KO*  Empty *p* = 0.2245  Stimulus *p* = 0.7608 | There are effects of group (F(1, 23) = 1.493, *p* = 0.2342), stage (F(1, 23) = 6.648, *p* = 0.0168), and group x stage interaction (F(1, 23) = 1.401, *p* = 0.2486). |
| 2k | Two-way ANOVA followed by Šídák’s multiple comparisons test | *Tek-Cre* n = 13  *eShank3-KO* n = 7 | Empty vs Stimulus  *Tek-Cre* *p =* 0.0325  *eShank3-KO p* = 0.0287  *Tek-Cre* vs *eShank3-KO*  Empty *p* = 0.2714  Stimulus *p* = 0.5605 | There are effects of group (F(1, 18) = 1.824, *p* = 0.1935), stage (F(1, 18) = 14.05, *p* = 0.0015), and group x stage interaction (F(1, 18) = 0.3787, *p* = 0.5460). |
| 2l | Two-way ANOVA followed by Šídák’s multiple comparisons test | *Tek-Cre* n = 15  *eShank3-KO* n = 10 | Empty vs Stimulus  *Tek-Cre* *p* <0.0001  *eShank3-KO p* = 0.0005  *Tek-Cre* vs *eShank3-KO*  Empty *p* = 0.7141  Stimulus *p* = 0.9990 | There are effects of group (F(1, 23) = 0.2002, *p* = 0.6588), stage (F(1, 23) = 54.23, *p <* 0.0001), and group x stage interaction (F(1, 23) = 0.4898, *p* = 0.4910). |
| 2m | Two-way ANOVA followed by Šídák’s multiple comparisons test | *Tek-Cre* n = 13  *eShank3-KO* n = 7 | Empty vs Stimulus  *Tek-Cre* *p =* 0.0064  *eShank3-KO p* = 0.0011  *Tek-Cre* vs *eShank3-KO*  Empty *p* = 0.6371  Stimulus *p* = 0.7639 | There are effects of group (F(1, 18) = 0.01393, *p* = 0.9074), stage (F(1, 18) = 29.10, *p <* 0.0001), and group x stage interaction (F(1, 18) = 1.894, *p* = 0.1856). |
| 2o | Two-way ANOVA followed by Šídák’s multiple comparisons test | *Tek-Cre* n = 15  *eShank3-KO* n = 10 | Empty vs Stimulus  *Tek-Cre* *p* <0.0001  *eShank3-KO p* = 0.0018  *Tek-Cre* vs *eShank3-KO*  Empty *p* = 0.9842  Stimulus *p* = 0.0068 | There are effects of group (F(1, 23) = 4.940, *p* = 0.0364), stage (F(1, 23) = 64.66, *p* < 0.0001), and group x stage interaction (F(1, 23) = 4.615, *p* = 0.0425). |
| 2p | Two-way ANOVA followed by Šídák’s multiple comparisons test | *Tek-Cre* n = 13  *eShank3-KO* n = 7 | Empty vs Stimulus  *Tek-Cre* *p <* 0.0001  *eShank3-KO p* = 0.0001  *Tek-Cre* vs *eShank3-KO*  Empty *p* = 0.9557  Stimulus *p* = 0.4325 | There are effects of group (F(1, 18) = 0.3443, *p* = 0.5646), stage (F(1, 18) = 88.53, *p <* 0.0001), and group x stage interaction (F(1, 18) = 1.306, *p* = 0.2680). |
| 4d | Two-tailed unpaired *t*-test | WT n = 3  KO n = 3 | ZO1  *p* <0.0001 | *t*(4) = 57.44 |
| Two-tailed unpaired *t*-test | WT n = 3  KO n = 3 | Claudin5  *p* < 0.0001 | *t*(4) = 147.5 |
| 4h | Two-tailed unpaired *t*-test | *Tek-Cre* n = 3  *eShank3-KO* n = 3 | ZO1  *p* = 0.0130 | *t*(4) = 4.264 |
| Two-tailed unpaired *t*-test | *Tek-Cre* n = 3  *eShank3-KO* n = 3 | Claudin5  *p* = 0.0094 | *t*(4) = 4.691 |
| 4j | Mixed-effects analysis followed by Šídák’s multiple comparisons test | *Tek-Cre* n = 64 from 3 mice  *eShank3-KO* n = 59 from 3 mice | Distance  -25 ~ -4 nm *p* = 0.0681 ~ > 0.9999  -3 nm *p* = 0.0025  -2 nm *p* = 0.0014  -1 nm *p* = 0.0005  0 nm *p* = 0.0002  1 nm *p* = 0.0003  2 nm *p* = 0.0015  3 nm *p* = 0.0082  4 ~ 25 nm *p* = 0.1178 ~ > 0.9999 | There are effects of group (F(1, 121) = 5.036, *p* = 0.0266), distance (F(50, 5821) = 19.12, *p <* 0.0001), and group x distance interaction (F(50, 5821) = 5.349, *p <* 0.0001). |
| 4l | Mixed-effects analysis followed by Šídák’s multiple comparisons test | *Tek-Cre* n = 55 from 3 mice  *eShank3-KO* n = 65 from 3 mice | Distance  -25 ~ -4 nm *p* = 0.9996 ~ > 0.9999  -3 nm *p* = 0.9922  -2 nm *p* = 0.8684  -1 nm *p* = 0.9027  0 nm *p* = 0.8935  1 nm *p* = 0.2835  2 nm *p* = 0.3889  3 nm *p* = 0.9142  4 ~ 25 nm *p* = 0.9787 ~ > 0.9999 | There are effects of group (F(1, 118) = 1.672, *p* = 0.1985), distance (F(50, 5567) = 25.05, *p <* 0.0001), and group x distance interaction (F(50, 5567) = 1.934, *p <* 0.0001). |
| 5c | Two-tailed unpaired *t*-test | WT n = 3  KO n = 3 | Cytoplasm  *p* = 0.0439 | *t*(4) = 2.905 |
| Two-tailed unpaired *t*-test | WT n = 3  KO n = 3 | Nucleus  *p* <0.0001 | *t*(4) = 16.76 |
| 5f | One-way ANOVA followed by Dunnett’s multiple comparisons test | eShank3-WT n = 3  eShank3-KO n = 3  eShank3-KO / 1 μM IWR-1-endo n = 3 | Cytoplasm  KO vs WT *p* = 0.0138  KO vs KO / 1 μM IWR-1-endo *p* = 0.0063 | F(2, 6) = 12.49, *p =* 0.0073 |
| One-way ANOVA followed by Dunnett’s multiple comparisons test | eShank3-WT n = 3  eShank3-KO n = 3  eShank3-KO / 1 μM IWR-1-endo n = 3 | Nucleus  KO vs WT *p* = 0.0020  KO vs KO / 1 μM IWR-1-endo *p* = 0.0034 | F(2, 6) = 20.63, *p =* 0.0020 |
| 5h | One-way ANOVA followed by Dunnett’s multiple comparisons test | eShank3-WT n = 3  eShank3-KO n = 3  eShank3-KO / 1 μM IWR-1-endo n = 3 | ZO1  KO vs WT *p* < 0.0001  KO vs KO / 1 μM IWR-1-endo *p* = 0.0005 | F(2, 6) = 140.3, *p < 0.0001* |
| One-way ANOVA followed by Dunnett’s multiple comparisons test | eShank3-WT n = 3  eShank3-KO n = 3  eShank3-KO / 1 μM IWR-1-endo n = 3 | Claudin5  KO vs WT *p* = 0.0011  KO vs KO / 1 μM IWR-1-endo *p* = 0.0066 | F(2, 6) = 22.83, *p =* 0.0016 |
| 5i | One-way ANOVA followed by Dunnett’s multiple comparisons test | eShank3-WT n = 4  eShank3-KO n = 4  eShank3-KO / 1 μM IWR-1-endo n=4 | KO vs WT *p* < 0.0001  KO vs KO / 1 μM IWR-1-endo *p* < 0.0001 | F(2, 9) = 95.75, *p < 0.0001* |
| 5j | Two-way ANOVA with repeated measures followed by Šídák’s multiple comparisons test | eShank3-WT n = 12  eShank3-KO n = 12  eShank3-KO/ 1 μM IWR-1-endo n = 12 | KO vs WT  Time: 0 h - 5 h  *p =* 0.8429 ~ 0.0564  Time: 5.5 h - 16.5 h  *p =* 0.0240 ~ 0.0465  Time: 17 h - 24.2 h  *p =* 0.0510 ~ 0.0636  Time: 24.2 h - 40.2 h  *p =* 0.0255 ~ 0.0111  Time: 40.7 h - 48.7 h  *p =* 0.0097 ~ 0.001  Time: 49.2 h - 53.7 h  *p =* 0.0008 ~ 0.0001  Time: 54.2 h - 91.2 h  *p =* <0.0001  Time: 91.7 h - 94.7 h  *p =* 0.0001 ~ 0.0002  KO vs KO / 1 μM IWR-1-endo  Time: 0 h - 48.2 h  *p =* 0.9087 ~ 0.0506  Time: 48.7 h - 50.2 h  *p =* 0.0320 ~ 0.0163  Time: 50.7 h - 53.2 h  *p =* 0.0071 ~ 0.001  Time: 53.5 h - 55.7 h  *p =* 0.0007 ~ 0.0001  Time: 56.2 h - 92.6 h  *p =* <0.0001  Time: 93.2 h - 94.7 h  *p =* 0.0001  § represented the P-value at the beginning and ending times of each range, based on the corresponding P-value range. | There are effects of group (F(2, 33) = 39.84, *p <* 0.0001), time (F(1.209, 39.89) = 286.4, *p <* 0.0001), and group x time interaction (F(378, 6237) = 17.02, *p <* 0.0001). |
| One-way ANOVA followed by Dunnett’s multiple comparisons test | eShank3-WT n = 12  eShank3-KO n = 12  eShank3-KO / 1 μM IWR-1-endo n=12 | KO vs WT *p* < 0.0001  KO vs KO / 1 μM IWR-1-endo *p* = 0.0199 | F(2, 33) = 21.68, *p < 0.0001* |
| 5l | One-way ANOVA followed by Dunnett’s multiple comparisons test | eShank3-WT n = 3  eShank3-KO n = 3  eShank3-KO / GSK3βS9A n =3 | Cytoplasm  KO vs WT *p* = 0.0336  KO vs KO / GSK3βS9A *p* = 0.0123 | F(2, 6) = 9.018, *p =* 0.0156 |
| One-way ANOVA followed by Dunnett’s multiple comparisons test | eShank3-WT n = 3  eShank3-KO n = 3  eShank3-KO / GSK3βS9A n =3 | Nucleus  KO vs WT *p* = 0.0009  KO vs KO / GSK3βS9A *p* = 0.0031 | F(2, 6) = 25.69, *p =* 0.0011 |
| 5n | One-way ANOVA followed by Dunnett’s multiple comparisons test | eShank3-WT n = 3  eShank3-KO n = 3  eShank3-KO / GSK3βS9A n =3 | ZO1  KO vs WT *p* < 0.0001  KO vs KO / GSK3βS9A *p* = 0.0053 | F(2, 6) = 61.50, *p =* 0.0001 |
| One-way ANOVA followed by Dunnett’s multiple comparisons test | eShank3-WT n = 3  eShank3-KO n = 3  eShank3-KO / GSK3βS9A n =3 | Claudin5  KO vs WT *p* = 0.0004  KO vs KO / GSK3βS9A *p* = 0.0076 | F(2, 6) = 32.36, *p =* 0.0006 |
| 5o | One-way ANOVA followed by Dunnett’s multiple comparisons test | eShank3-WT n = 4  eShank3-KO n = 4  eShank3-KO/ GSK3βS9A n = 4 | KO vs WT *p* < 0.0001  KO vs KO / GSK3βS9A *p* < 0.0001 | F(2, 9) = 410.8, *p < 0.0001* |
| 5p | Two-way ANOVA with repeated measures followed by Šídák’s multiple comparisons test | eShank3-WT n = 12  eShank3-KO n = 12  eShank3-KO/ GSK3βS9A n = 12 | KO vs WT  Time: 0 h - 3.5 h  *p =* < 0.0001  Time: 4 h - 26.7 h  *p =* 0.1151 ~ 0.1610  Time: 27.2 h - 37.7 h  *p =* 0.0089 ~ 0.0099  Time: 38.2 h - 40.7 h  *p =* 0.0137 ~ 0.0112  Time: 41.2 h - 44.2 h  *p =* 0.0079 ~ 0.0012  Time: 44.7 h - 48.2 h  *p =* 0.0009 ~ 0.0001  Time: 48.7 h - 95.2 h  *p =* < 0.0001  KO vs KO / GSK3βS9A Time: 0 h - 1h  *p =* < 0.0001  Time: 1.5 h - 6 h  *p =* 0.0624 ~ 0.6966  Time: 6.5 h - 8.5 h  *p =* 0.0097 ~ 0.0017  Time: 9 h - 14.5 h  *p =* 0.0003 ~ 0.0001  Time: 15 h - 27.2 h  *p =* <0.0001  Time: 27.7 h  *p =* 0.0003  Time: 28.2 h - 29.7 h  *p =* 0.0013 ~ 0.0074  Time: 30.2 h - 33.7 h  *p =* 0.0136 ~ 0.0498  Time: 34.2 h - 53.2 h  *p =* 0.0644 ~ 0.0543  Time: 53.7 h - 55.2 h  *p =* 0.0366 ~ 0.0185  Time: 55.7 h - 57.7 h  *p =* 0.0093 ~ 0.0011  Time: 58.2 h - 60.2 h  *p =* 0.0007 ~ 0.0001  Time: 60.7 h - 95.2 h  *p =* <0.0001  § represented the P-value at the beginning and ending times of each range, based on the corresponding P-value range. | There are effects of group (F(2, 33) = 60.35, *p <* 0.0001), time (F(3.090, 102.0) = 3145, *p <* 0.0001), and group x time interaction (F(364, 6006) = 122.9, *p <* 0.0001). |
| One-way ANOVA followed by Dunnett’s multiple comparisons test | eShank3-WT n = 12  eShank3-KO n = 12  eShank3-KO/ GSK3βS9A n = 12 | KO vs WT *p* < 0.0001  KO vs KO / GSK3βS9A *p* < 0.0001 | F(2, 33) = 242.3, *p < 0.0001* |
| 5t | Two-way ANOVA followed by Šídák’s multiple comparisons test | Control  *Tek-Cre* n = 9  *eShank3-KO* n = 10  GSK3βS9A  *Tek-Cre* n = 13  *eShank3-KO* n = 10 | Control vs GSK3βS9A  *Tek-Cre* *p =* 0.2624  *eShank3-KO* *p =* 0.0497  *Tek-Cre* vs *eShank3-KO*  Control *p* = 0.0043  GSK3βS9A *p* = 0.8903 | There are effects of group (F(1, 38) = 4.568, *p* = 0.0391), GSK3βS9A (F(1, 38) = 0.3937, *p =*0.5341), and group x GSK3βS9A interaction (F(1, 38) = 7.397, *p* = 0.0098). |
| 5u | Two-way ANOVA followed by Šídák’s multiple comparisons test | Control  *Tek-Cre* n = 11  *eShank3-KO* n = 13  GSK3βS9A  *Tek-Cre* n = 14  *eShank3-KO* n = 11 | Control vs GSK3βS9A  *Tek-Cre* *p =* 0.8837  *eShank3-KO* *p =* 0.4001  *Tek-Cre* vs *eShank3-KO*  Control *p* = 0.4110  GSK3βS9A *p* = 0.8741 | There are effects of group (F(1, 45) = 0.2891, *p* = 0.5934), GSK3βS9A (F(1, 45) = 0.3188, *p =*0.5751), and group x GSK3βS9A interaction (F(1, 45) = 1.411, *p* = 0.2411). |
| Extended Data Fig. 1e | Two-way ANOVA followed by Šídák’s multiple comparisons test | Primary BECs  *Shank3* (a), (a+b), (a+b+c+d+e)  n = 6, 6, 6  bEnd.3 BECs  *Shank3* (a), (a+b), (a+b+c+d+e)  n = 6, 6, 4  Neuron  *Shank3* (a), (a+b), (a+b+c+d+e)  n = 6, 6, 6 | *Shank3* (a)  Neuron vs Primary BECs *p* < 0.0001  Neuron vs bEnd.3 BECs *p* < 0.0001  *Shank3* (a+b)  Neuron vs Primary BECs *p* < 0.0001  Neuron vs bEnd.3 BECs *p* = 0.0008  *Shank3* (a+b+c+d+e)  Neuron vs Primary BECs *p* = 0.9996  Neuron vs bEnd.3 BECs *p* > 0.9999 | There are effects of group (F(2, 43) = 25.36, *p < 0.0001*), *Shank3 isoform* (F(2, 43) = 76.97, *p <* 0.0001), and interaction (F(4, 43) = 6.896, *p* = 0.0002). |
| Extended Data Fig. 3b | Two-tailed unpaired *t*-test | *Ai-14:Tek-Cre* n = 5  *Ai-14:eShank3-KO* n = 4 | *p* = 0.0429 | *t*(7) = 2.468 |
| Extended Data Fig. 3c | Two-tailed unpaired *t*-test | *Ai-14:Tek-Cre* n = 5  *Ai-14:eShank3-KO* n = 4 | *p* = 0.9309 | *t*(7) = 0.08984 |
| Extended Data Fig. 3d | Two-tailed unpaired *t*-test | *Ai-14:Tek-Cre* n = 5  *Ai-14:eShank3-KO* n = 4 | *p* = 0.0025 | *t*(7) = 4.592 |
| Extended Data Fig. 3e | Two-tailed unpaired *t*-test | *Ai-14:Tek-Cre* n = 5  *Ai-14:eShank3-KO* n = 4 | *p* = 0.5938 | *t*(7) = 0.5587 |
| Extended Data Fig. 3g | Two-tailed unpaired *t*-test | *Ai-14:Tek-Cre* n = 5  *Ai-14:eShank3-KO* n = 5 | *p* = 0.0125 | *t*(8) = 3.204 |
| Extended Data Fig. 3h | Two-tailed unpaired *t*-test | *Ai-14:Tek-Cre* n = 5  *Ai-14:eShank3-KO* n = 5 | *p* = 0.6783 | *t*(8) = 0.4303 |
| Extended Data Fig. 3i | Two-tailed unpaired *t*-test | *Ai-14:Tek-Cre* n = 5  *Ai-14:eShank3-KO* n = 5 | *p* = 0.0405 | *t*(8) = 2.441 |
| Extended Data Fig. 3j | Two-tailed unpaired *t*-test | *Ai-14:Tek-Cre* n = 5  *Ai-14:eShank3-KO* n = 5 | *p* = 0.6058 | *t*(8) = 0.5371 |
| Extended Data Fig. 3k | Two-tailed unpaired *t*-test | *Ai-14:Tek-Cre* n = 5  *Ai-14:eShank3-KO* n = 5 | *p* = 0.2287 | *t*(8) = 1.303 |
| Extended Data Fig. 3l | Two-tailed unpaired *t*-test | *Ai-14:Tek-Cre* n = 5  *Ai-14:eShank3-KO* n = 5 | *p* = 0.4315 | *t*(8) = 0.8283 |
| Extended Data Fig. 3m | Two-tailed unpaired *t*-test | *Ai-14:Tek-Cre* n = 5  *Ai-14:eShank3-KO* n = 5 | *p* = 0.2106 | *t*(8) = 1.361 |
| Extended Data Fig. 3n | Two-tailed unpaired *t*-test | *Ai-14:Tek-Cre* n = 5  *Ai-14:eShank3-KO* n = 5 | *p* = 0.7177 | *t*(8) = 0.3746 |
| Extended Data Fig. 3o | Two-tailed unpaired *t*-test | *Ai-14:Tek-Cre* n = 5  *Ai-14:eShank3-KO* n = 5 | *p* = 0.3462 | *t*(8) = 1.001 |
| Extended  Data Fig. 3p | Two-tailed unpaired *t*-test | *Ai-14:Tek-Cre* n = 5  *Ai-14:eShank3-KO* n = 5 | *p* = 0.3506 | *t*(8) = 0.9912 |
| Extended Data Fig. 3q | Two-tailed unpaired *t*-test | *Ai-14:Tek-Cre* n = 5  *Ai-14:eShank3-KO* n = 5 | *p* = 0.7254 | *t*(8) = 0.3639 |
| Extended  Data Fig. 3r | Two-tailed unpaired *t*-test | *Ai-14:Tek-Cre* n = 5  *Ai-14:eShank3-KO* n = 5 | *p* = 0.2806 | *t*(8) = 1.157 |
| Extended Data Fig. 4a | Two-tailed unpaired *t*-test | *Tek-Cre* n = 11  *eShank3-KO* n = 10 | *p* = 0.0360 | *t*(19) = 2.257 |
| Extended Data Fig. 4b | Two-tailed unpaired *t*-test | *Tek-Cre* n = 13  *eShank3-KO* n = 7 | *p* = 0.4492 | *t*(18) = 0.7737 |
| Extended Data Fig. 4c | Two-tailed unpaired *t*-test | *Tek-Cre* n = 11  *eShank3-KO* n = 10 | *p* = 0.0337 | *t*(19) = 2.288 |
| Extended Data Fig. 4d | Two-tailed unpaired *t*-test | *Tek-Cre* n = 13  *eShank3-KO* n = 7 | *p* = 0.3872 | *t*(18) = 0.8863 |
| Extended Data Fig. 4f | Two-tailed unpaired *t*-test | *Tek-Cre* n = 11  *eShank3-KO* n = 10 | *p* = 0.6178 | *t*(19) = 0.5073 |
| Extended Data Fig. 4g | Two-tailed unpaired *t*-test | *Tek-Cre* n = 13  *eShank3-KO* n = 7 | *p* = 0.7953 | *t*(18) = 0.2633 |
| Extended Data Fig. 4h | Two-tailed unpaired *t*-test | *Tek-Cre* n = 11  *eShank3-KO* n = 10 | *p* = 0.5593 | *t*(19) = 0.5944 |
| Extended Data Fig. 4i | Two-tailed unpaired *t*-test | *Tek-Cre* n = 13  *eShank3-KO* n = 7 | *p* = 0.7952 | *t*(18) = 0.2635 |
| Extended Data Fig. 4j | Two-way ANOVA followed by Šídák’s multiple comparisons test | *Tek-Cre* n = 11  *eShank3-KO* n = 10 | Center vs Margin  *Tek-Cre* *p <* 0.0001  *eShank3-KO* *p* < 0.0001  *Tek-Cre* vs *eShank3-KO*  Center *p* = 0.9726  Margin *p* = 0.9726 | There are effects of group (F(1, 19) = 6.069, *p* = 0.0235), place (F(1, 19) = 686.5, *p <* 0.0001), and group x place interaction (F(1, 19) = 0.4424, *p* = 0.8356). |
| Extended Data Fig. 4k | Two-way ANOVA followed by Šídák’s multiple comparisons test | *Tek-Cre* n = 13  *eShank3-KO* n = 7 | Center vs Margin  *Tek-Cre* *p <* 0.0001  *eShank3-KO* *p* < 0.0001  *Tek-Cre* vs *eShank3-KO*  Center *p* = 0.7167  Margin *p* = 0.7167 | There are effects of group (F(1, 18) = 0.00, *p >0.9999*), place (F(1, 18) = 427.6, *p <* 0.0001), and group x place interaction (F(1, 18) = 0.5386, *p* = 0.4725). |
| Extended Data Fig. 4l | Two-tailed unpaired *t*-test | *Tek-Cre* n = 11  *eShank3-KO* n = 10 | *p* = 0.6827 | *t*(19) = 0.4152 |
| Extended Data Fig. 4m | Two-tailed unpaired *t*-test | *Tek-Cre* n = 13  *eShank3-KO* n = 7 | *p* = 0.9866 | *t*(18) = 0.01706 |
| Extended Data Fig. 4o | Two-tailed unpaired *t*-test | *Tek-Cre* n = 11  *eShank3-KO* n = 10 | *p* = 0.1657 | *t*(19) = 1.442 |
| Extended Data Fig. 4p | Two-tailed unpaired *t*-test | *Tek-Cre* n = 13  *eShank3-KO* n = 7 | *p* = 0.9421 | *t*(18) = 0.07359 |
| Extended Data Fig. 4q | Two-tailed unpaired *t*-test | *Tek-Cre* n = 11  *eShank3-KO* n = 10 | *p* = 0.6869 | *t*(19) = 0.4093 |
| Extended Data Fig. 4r | Two-tailed unpaired *t*-test | *Tek-Cre* n = 13  *eShank3-KO* n = 7 | *p* = 0.8890 | *t*(18) = 0.1415 |
| Extended Data Fig. 7b | Two-tailed unpaired *t*-test | WT n = 3  KO n = 3 | ZO2  *p* = 0.7255 | *t*(4) = 0.3768 |
| Two-tailed unpaired *t*-test | WT n = 3  KO n = 3 | Afadin  *p* = 0.0156 | *t*(4) = 4.043 |
| Two-tailed unpaired *t*-test | WT n = 3  KO n = 3 | Cortactin  *p* = 0.0476 | *t*(4) = 2.824 |
| Two-tailed unpaired *t*-test | WT n = 3  KO n = 3 | Cingulin-like protein 1  *p* = 0.0205 | *t*(4) = 3.718 |
| Extended Data Fig. 7d | Two-tailed unpaired *t*-test | *Tek-Cre* n = 3  *eShank3-KO* n = 3 | ZO2  *p* = 0.0417 | *t*(4) = 2.957 |
| Two-tailed unpaired *t*-test | *Tek-Cre* n = 3  *eShank3-KO* n = 3 | Afadin  *p* = 0.4362 | *t*(4) = 0.8642 |
| Two-tailed unpaired *t*-test | *Tek-Cre* n = 3  *eShank3-KO* n = 3 | Cortactin  *p* = 0.0294 | *t*(4) = 3.318 |
| Two-tailed unpaired *t*-test | *Tek-Cre* n = 3  *eShank3-KO* n = 3 | Cingulin-like protein 1  *p* = 0.0413 | *t*(4) = 2.967 |
| Extended Data Fig. 8a | One-way ANOVA followed by Dunnett’s multiple comparisons test | eShank3-WT n = 3  eShank3-KO n = 3  eShank3-KO / 1 μM IWR-1-endo n = 3 | KO vs WT *p* < 0.0001  KO vs KO / 1 μM IWR-1-endo *p* = 0.0046 | F(2, 6) = 54.98, *p =* 0.0001 |
| Extended Data Fig. 8b | One-way ANOVA followed by Dunnett’s multiple comparisons test | eShank3-WT n = 3  eShank3-KO n = 3  eShank3-KO / 1 μM IWR-1-endo n = 3 | KO vs WT *p* < 0.0001  KO vs KO / 1 μM IWR-1-endo *p* < 0.0001 | F(2, 6) = 397.8, *p* < 0.0001 |
| Extended Data Fig. 8d | One-way ANOVA followed by Dunnett’s multiple comparisons test | eShank3-WT n = 3  eShank3-KO n = 3  eShank3-KO/ GSK3βS9A n = 3 | KO vs WT *p* = 0.0005  KO vs KO / GSK3βS9A *p* = 0.0026 | F(2, 6) = 30.35, *p =* 0.0007 |
| Extended Data Fig. 8e | One-way ANOVA followed by Dunnett’s multiple comparisons test | eShank3-WT n = 3  eShank3-KO n = 3  eShank3-KO/ GSK3βS9A n = 3 | KO vs WT *p* = 0.0016  KO vs KO / GSK3βS9A *p* = 0.0003 | F(2, 6) = 35.70, *p =* 0.0005 |
| Extended Data Fig. 9a | Two-tailed unpaired *t*-test | WT n = 6  KO n = 6 | *p* < 0.0001 | *t*(10) = 13.82 |
| Extended Data Fig. 9c | Two-tailed unpaired *t*-test | WT n = 3  KO n = 3 | *p =* 0.0036 | *t*(4) = 6.135 |
| Extended Data Fig. 9e | One-way ANOVA followed by Dunnett’s multiple comparisons test | eShank3-WT n = 3  eShank3-KO n = 3  eShank3-KO/ CEBPα n = 3 | KO vs WT *p* = 0. 003  KO vs KO / C/EBPα  *p* = 0.3501 | F(2, 6) = 15.76, *p =* 0.0041 |
| Extended Data Fig. 9f | One-way ANOVA followed by Dunnett’s multiple comparisons test | eShank3-WT n = 3  eShank3-KO n = 3  eShank3-KO/ C/EBPα n = 3 | KO vs WT *p* = 0.0025  KO vs KO / C/EBPα *p* = 0.0003 | F(2, 6) = 35.86, *p =* 0.0005 |
| Extended Data Fig. 9g | Two-way ANOVA with repeated measures followed by Šídák’s multiple comparisons test | eShank3-WT n = 4  eShank3-KO n = 4  eShank3-KO/ C/EBPα n = 4 | KO vs WT  Time: 0 h - 5.1 h  *p =* 0.9993 ~ 0.3256  Time: 6.1 h  *p =* 0.0173  Time: 7.1 h  *p =* 0.0014  Time: 8.1 h  *p =* 0.0003  Time: 4.1 h - 27.7 h  *p =* <0.0001  Time: 28.7 h - 30.7 h  *p =* 0.0002 ~ 0.0008  Time: 31.7 h - 47.7 h  *p =* 0.0011 ~ 0.0013  Time: 48.7 h - 55.7 h  *p =* 0.0004 ~ 0.0002  Time: 59.7 h - 119.7 h  *p =* <0.0001  KO vs KO / C/EBPα  Time: 0 h - 10.1h  *p =* 0.7048 ~ 0.0577  Time: 11.2 h – 10.1 h  *p =* 0.0459 ~ 0.0433  Time: 11.2 h - 23.1 h  *p =* 0.0580 ~ 0.0798  Time: 23.7 h - 26.7 h  *p =* 0.0268 ~ 0.0279  Time: 27.7 h - 45.7 h  *p =* 0.0510 ~ 0.1082  Time: 46.7 h - 50.7 h  *p =* 0.0471 ~ 0.0129  Time: 51.7 h - 70.7 h  *p =* 0.0091 ~ 0.0045  Time: 71.7 h - 74.7 h  *p =* 0.0106 ~ 0.0478  Time: 75.7 h - 90.7 h  *p =* 0.0655 ~ 0.0616  Time: 91.7 h - 99.7 h  *p =* 0.0412 ~ 0.0101  Time: 100.7 h - 119.7 h  *p =* 0.0079 ~ 0.0017  § represented the P-value at the beginning and ending times of each range, based on the corresponding P-value range. | There are effects of group (F(2, 9) = 154.3, *p <* 0.0001), time (F(2.129, 19.16) = 2302, *p <* 0.0001), and group x time interaction (F(242, 1089) = 200.3, *p <* 0.0001). |
| Extended Data Fig. 9h | One-way ANOVA followed by Dunnett’s multiple comparisons test | eShank3-WT n = 4  eShank3-KO n = 4  eShank3-KO/ C/EBPα n = 4 | KO vs WT *p <* 0.0001  KO vs KO / C/EBPα *p <* 0.0001 | F(2, 9) = 35.86, *p <* 0.0001 |
